# Supplementary material for: Computational screening of single-atom doped In2O3 catalysts for the reverse water gas shift reaction
Source: Royal Society of Chemistry journal article supplement (doi:10.1039/d3cp04352e), 2023-11-29
Supplement: d3cp04352e1.pdf [file d3cp04352e1.pdf]

**Electronic Supplementary Information for**

**Computational Screening of Single-Atom Doped In<sub>2</sub>O<sub>3</sub> Catalysts for the Reverse  
Water Gas Shift Reaction**

Yuchen Wang <sup>a,b</sup> and Shenggang Li <sup>a,b,c\*</sup>

*<sup>a</sup>School of Physical Science and Technology, ShanghaiTech University, Shanghai  
201210, P. R. China*

*<sup>b</sup>CAS Key Laboratory of Low-Carbon Conversion Science and Engineering, Shanghai  
Advanced Research Institute, Chinese Academy of Sciences, Shanghai 201203, P. R.  
China*

*<sup>c</sup>University of Chinese Academy of Sciences, Beijing 100049, P. R. China*

*\*Corresponding author. Tel: +86-021-20350994.*

*E-mail: lisg@sari.ac.cn (S. Li)*

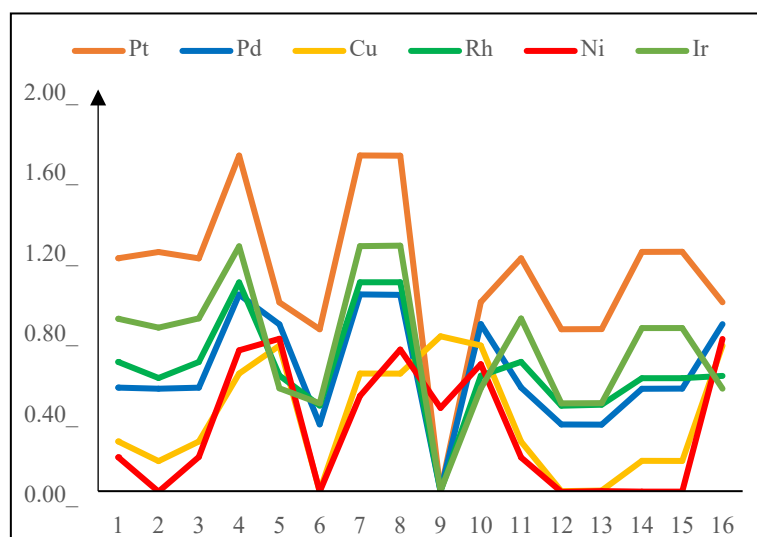

**Figure S1.** Relative energy maps of single-atom metals (Pt, Ir, Pd, Rh, Cu, Ni) doped at 16 sites on c-In<sub>2</sub>O<sub>3</sub>(111) surface.

**Table S1.** Classification of the metal sites (a-f) of M/In<sub>2</sub>O<sub>3</sub>(111).

| Site     | In site | Relative energy(eV) |      |      |      |      |      |
|----------|---------|---------------------|------|------|------|------|------|
|          |         | Pt                  | Pd   | Cu   | Rh   | Ni   | Ir   |
| <b>a</b> | 1,3,11  | 1.16                | 0.52 | 0.25 | 0.64 | 0.17 | 0.86 |
| <b>b</b> | 2,14,15 | 1.19                | 0.51 | 0.15 | 0.56 | 0.47 | 0.81 |
| <b>c</b> | 4,7,8   | 1.67                | 0.98 | 0.59 | 1.04 | 0.70 | 1.22 |
| <b>d</b> | 5,10,16 | 0.94                | 0.83 | 0.72 | 0.58 | 0.76 | 0.51 |
| <b>e</b> | 6,12,13 | 0.81                | 0.30 | 0.00 | 0.43 | 0.00 | 0.44 |
| <b>f</b> | 9       | 0.00                | 0.00 | 0.77 | 0.00 | 0.41 | 0.00 |

**Table S2.** The  $O_V$  formation energy of  $M/In_2O_3(111)$ .

| <b>M-<br/>O<sub>V</sub></b>           | <b>E<sub>f,O<sub>V</sub></sub><br/>/eV</b> | <b>M-<br/>O<sub>V</sub></b>           | <b>E<sub>f,O<sub>V</sub></sub><br/>eV</b> | <b>M-<br/>O<sub>V</sub></b>           | <b>E<sub>f,O<sub>V</sub></sub><br/>eV</b> | <b>M-<br/>O<sub>V</sub></b>           | <b>E<sub>f,O<sub>V</sub></sub><br/>eV</b> | <b>M-<br/>O<sub>V</sub></b>            | <b>E<sub>f,O<sub>V</sub></sub><br/>eV</b> | <b>M-O<sub>V</sub></b>                 | <b>E<sub>f,O<sub>V</sub></sub><br/>/eV</b> |
|---------------------------------------|--------------------------------------------|---------------------------------------|-------------------------------------------|---------------------------------------|-------------------------------------------|---------------------------------------|-------------------------------------------|----------------------------------------|-------------------------------------------|----------------------------------------|--------------------------------------------|
| Pt <sub>9</sub> -<br>O <sub>V4</sub>  | 2.71                                       | Ir <sub>9</sub> -<br>O <sub>V4</sub>  | 3.68                                      | Pd <sub>9</sub> -<br>O <sub>V4</sub>  | 1.99                                      | Rh <sub>9</sub> -<br>O <sub>V4</sub>  | 2.65                                      | Cu <sub>12</sub> -<br>O <sub>V7</sub>  | 1.42                                      | Ni <sub>12</sub> -<br>O <sub>V7</sub>  | 1.79                                       |
| Pt <sub>9</sub> -<br>O <sub>V8</sub>  | 2.70                                       | Ir <sub>9</sub> -<br>O <sub>V8</sub>  | 3.68                                      | Pd <sub>9</sub> -<br>O <sub>V8</sub>  | 1.99                                      | Rh <sub>9</sub> -<br>O <sub>V8</sub>  | 2.65                                      | Cu <sub>12</sub> -<br>O <sub>V10</sub> | 0.66                                      | Ni <sub>12</sub> -<br>O <sub>V10</sub> | 0.78                                       |
| Pt <sub>7</sub> -<br>O <sub>V2</sub>  | 2.16                                       | Ir <sub>7</sub> -<br>O <sub>V2</sub>  | 3.21                                      | Pd <sub>7</sub> -<br>O <sub>V2</sub>  | 2.05                                      | Rh <sub>7</sub> -<br>O <sub>V2</sub>  | 2.31                                      | Cu <sub>7</sub> -<br>O <sub>V2</sub>   | 1.63                                      | Ni <sub>7</sub> -<br>O <sub>V2</sub>   | 1.98                                       |
| Pt <sub>7</sub> -<br>O <sub>V5</sub>  | 1.92                                       | Ir <sub>7</sub> -<br>O <sub>V5</sub>  | 3.01                                      | Pd <sub>7</sub> -<br>O <sub>V5</sub>  | 1.58                                      | Rh <sub>7</sub> -<br>O <sub>V5</sub>  | 2.31                                      | Cu <sub>7</sub> -<br>O <sub>V5</sub>   | 0.72                                      | Ni <sub>7</sub> -<br>O <sub>V5</sub>   | 1.28                                       |
| Pt <sub>7</sub> -<br>O <sub>V6</sub>  | 3.52                                       | Ir <sub>7</sub> -<br>O <sub>V6</sub>  | 3.99                                      | Pd <sub>7</sub> -<br>O <sub>V6</sub>  | 2.77                                      | Rh <sub>7</sub> -<br>O <sub>V6</sub>  | 4.14                                      | Cu <sub>7</sub> -<br>O <sub>V6</sub>   | 2.18                                      | Ni <sub>7</sub> -<br>O <sub>V6</sub>   | 2.86                                       |
| Pt <sub>8</sub> -<br>O <sub>V6</sub>  | 2.73                                       | Ir <sub>8</sub> -<br>O <sub>V6</sub>  | 3.20                                      | Pd <sub>8</sub> -<br>O <sub>V6</sub>  | 2.62                                      | Rh <sub>8</sub> -<br>O <sub>V6</sub>  | 3.72                                      | Cu <sub>8</sub> -<br>O <sub>V6</sub>   | 2.19                                      | Ni <sub>8</sub> -<br>O <sub>V6</sub>   | 2.88                                       |
| Pt <sub>11</sub> -<br>O <sub>V6</sub> | 2.86                                       | Ir <sub>11</sub> -<br>O <sub>V6</sub> | 4.07                                      | Pd <sub>11</sub> -<br>O <sub>V6</sub> | 2.57                                      | Rh <sub>11</sub> -<br>O <sub>V6</sub> | 3.86                                      | Cu <sub>11</sub> -<br>O <sub>V6</sub>  | 2.00                                      | Ni <sub>11</sub> -<br>O <sub>V6</sub>  | 2.79                                       |

**Table S3.** The adsorption energy of  $CO_2$  on  $M_{7/8/11}-O_{V6}$  sites.

| <b>E<sub>ads</sub>/eV</b>                                            | <b>Pt</b> | <b>Ir</b> | <b>Pd</b> | <b>Cu</b> | <b>Rh</b> | <b>Ni</b> |
|----------------------------------------------------------------------|-----------|-----------|-----------|-----------|-----------|-----------|
| E <sub>ads</sub> (M <sub>7</sub> -O <sub>V6</sub> -CO <sub>2</sub> ) | -1.46     | -1.10     | -0.65     | -0.50     | -0.82     | -0.35     |
| E <sub>ads</sub> (M <sub>8</sub> -O <sub>V6</sub> -CO <sub>2</sub> ) | -0.66     | -0.90     | -0.28     | -0.35     | -0.81     | -0.08     |
| E <sub>ads</sub> (M <sub>11</sub> -O <sub>V6</sub> -CO)              | -0.85     | /         | -0.68     | -0.48     | -1.17     | -0.43     |

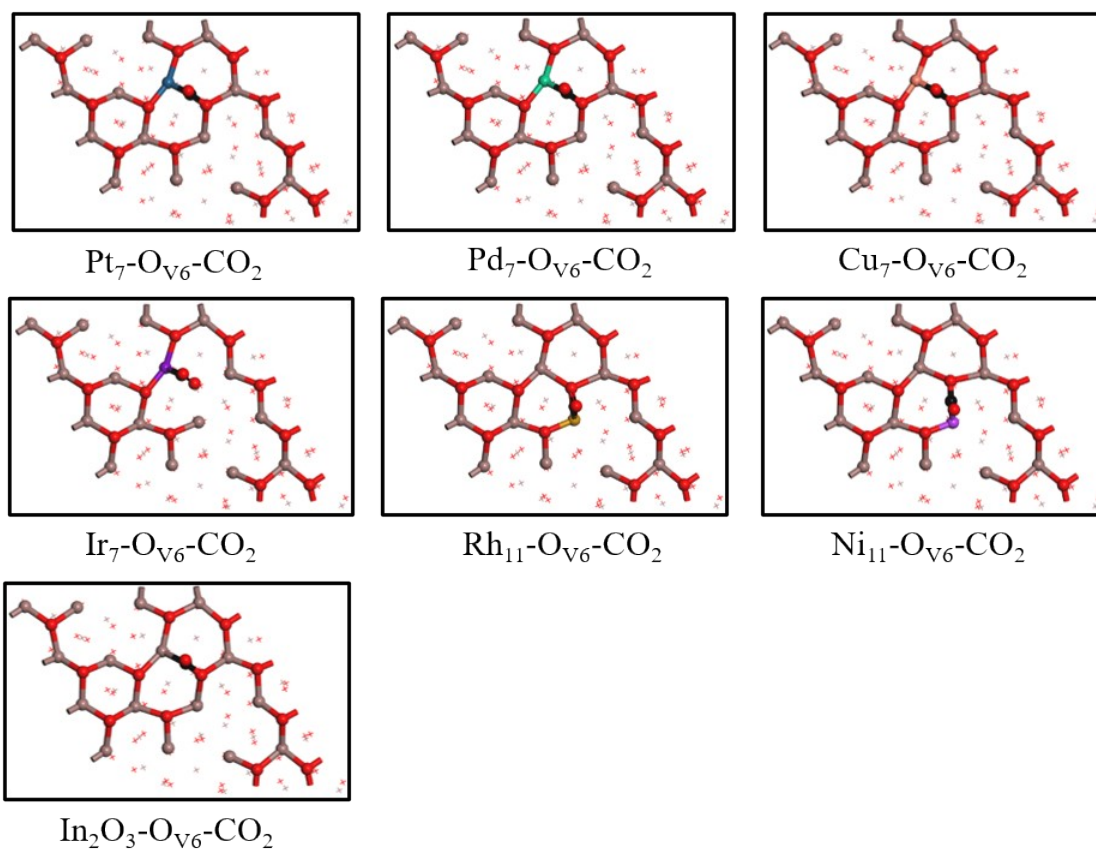

**Figure S2.** Optimized structure for the most stable CO<sub>2</sub> adsorption on M/In<sub>2</sub>O<sub>3</sub>(111) surfaces

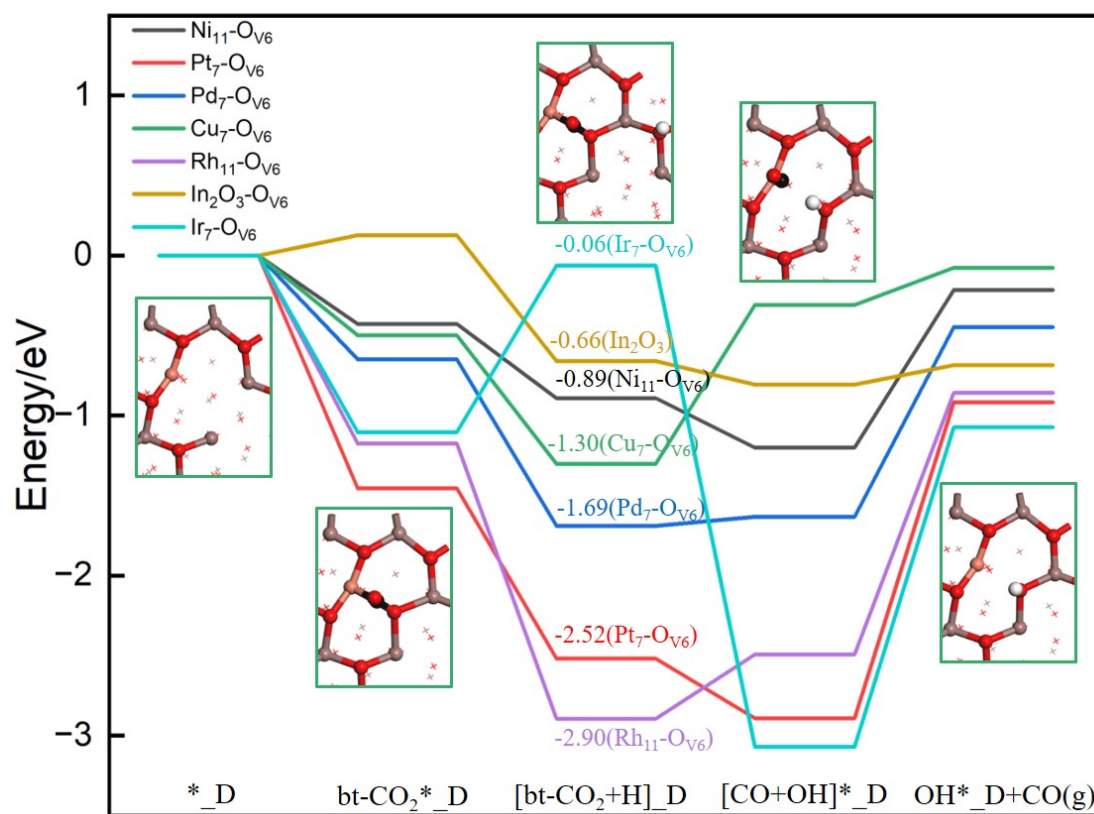

**Figure S3.** Energy profiles for CO<sub>2</sub> hydrogenation to form CO via the indirect dissociation pathway on the M/In<sub>2</sub>O<sub>3</sub> (M = Ni, Pt, Pd, Cu, Rh, Ir.). The structures shown are for the Cu/In<sub>2</sub>O<sub>3</sub> surface.

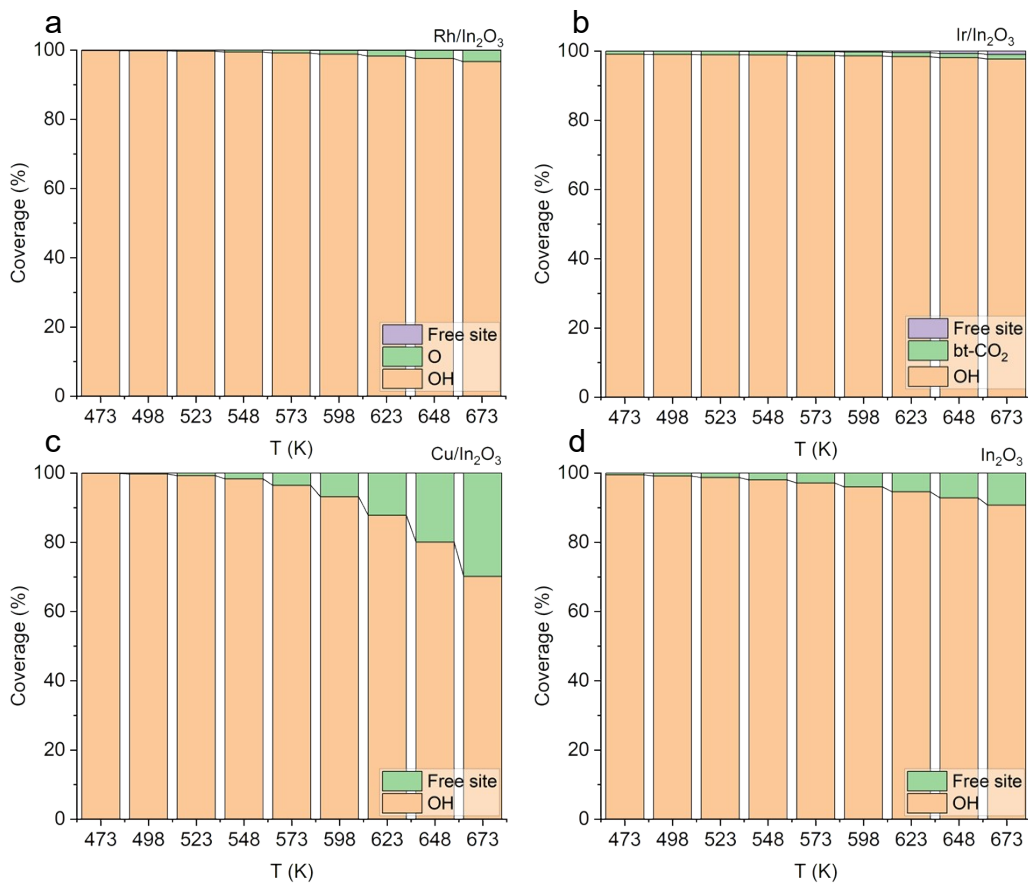

**Figure S4.** Calculated coverages of surface adsorbates. Coverages of the major surface species during the CO<sub>2</sub> hydrogenation reaction on the defective Rh/In<sub>2</sub>O<sub>3</sub> model (a), on the defective Ir/In<sub>2</sub>O<sub>3</sub> model (b), on the defective Cu/In<sub>2</sub>O<sub>3</sub> model (c), and on the defective In<sub>2</sub>O<sub>3</sub> model (d).

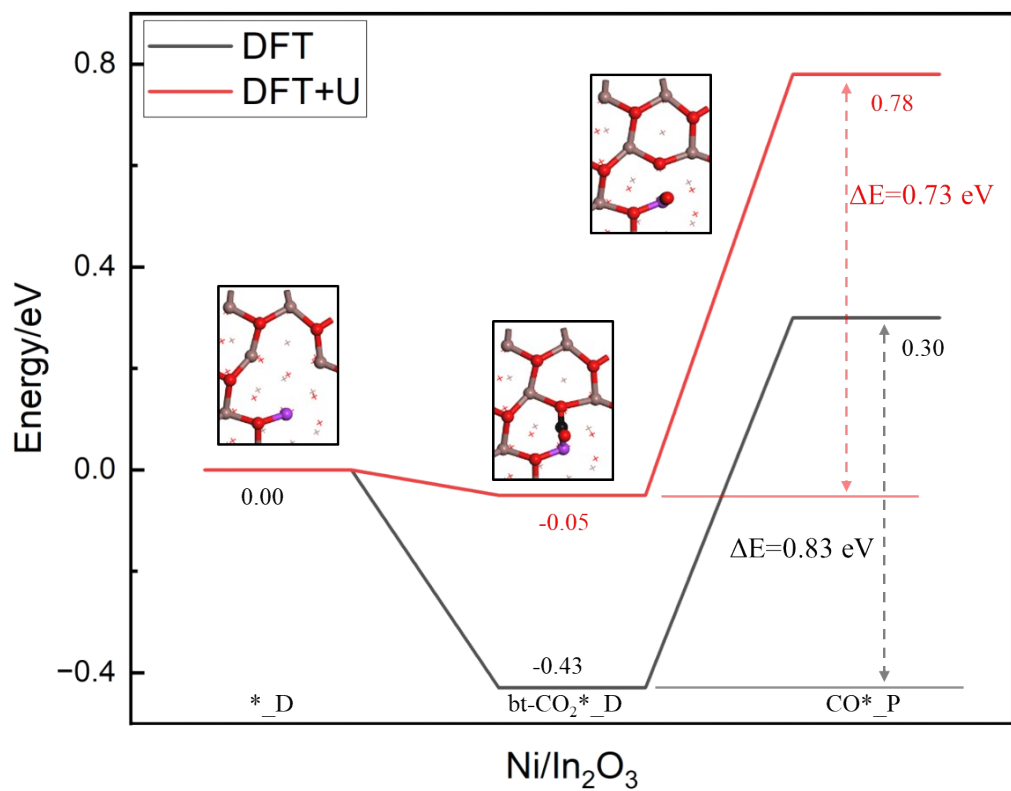

**Figure S5.** CO<sub>2</sub> direct dissociation energies on Ni/In<sub>2</sub>O<sub>3</sub> in the presence or absence of Hubbard  $U$  correction ( $U - J = 2.4$  eV for Ni).

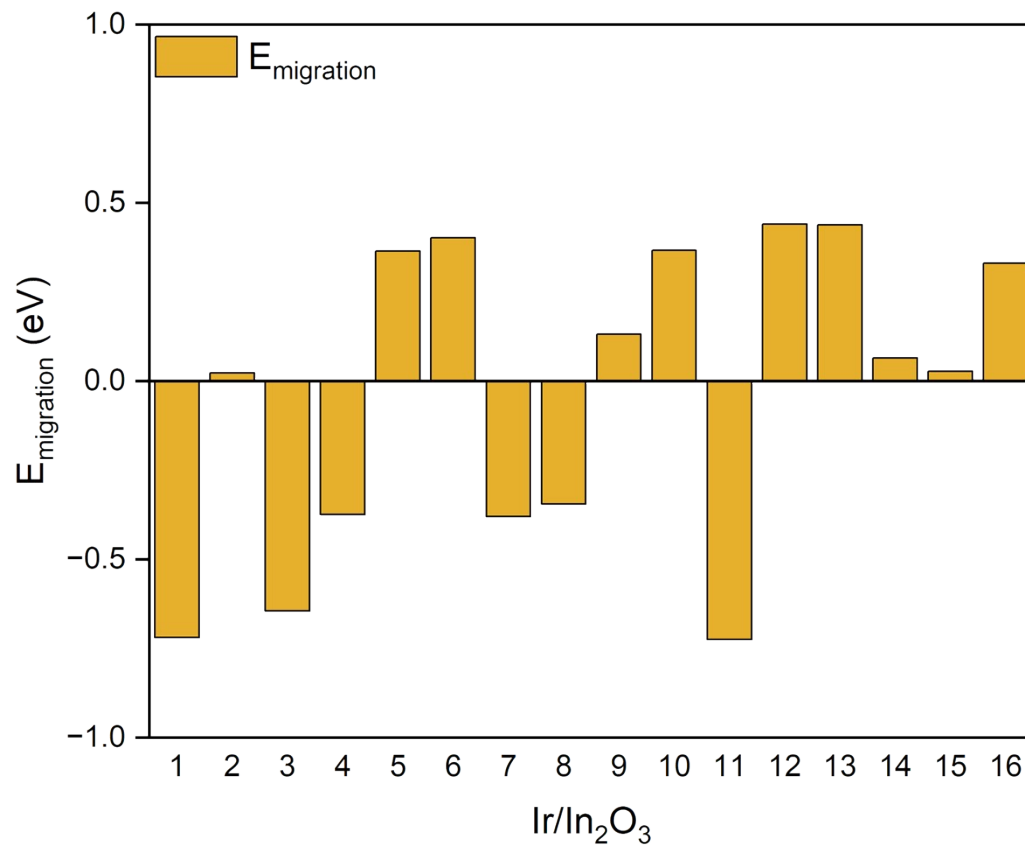

**Figure S6.** The migration energy of Ir atoms at 16 sites on the surface to the subsurface in the Ir/In<sub>2</sub>O<sub>3</sub> model.



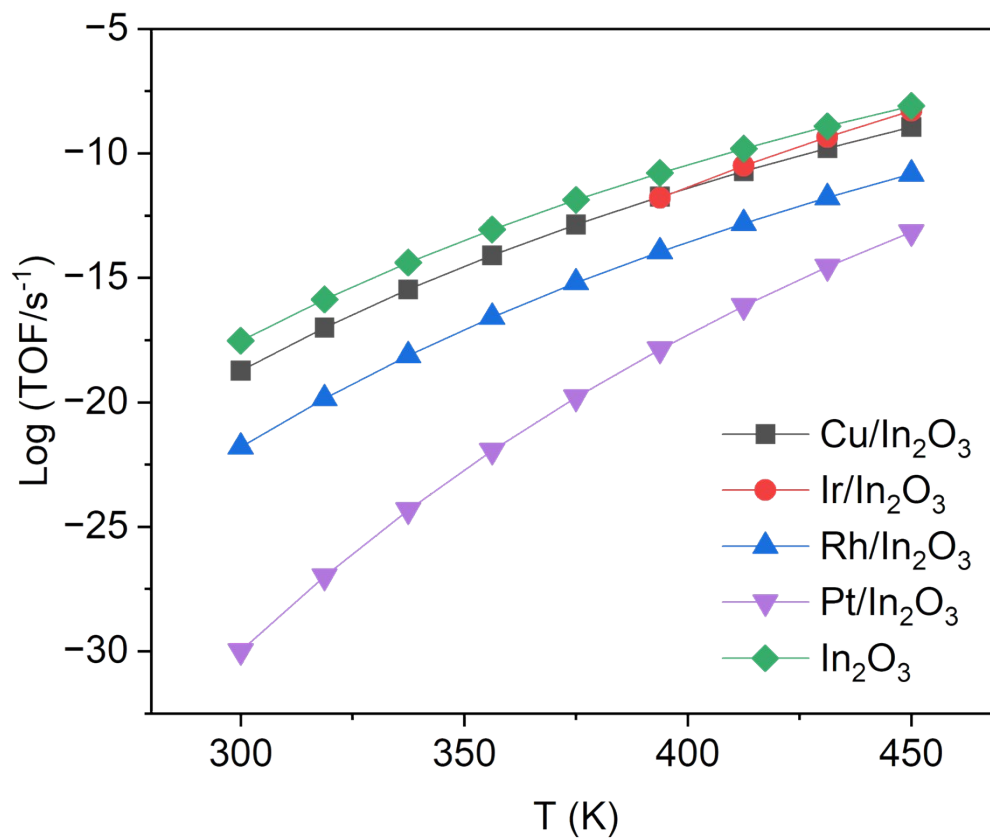

**Figure S7.** Plot of calculated turnover frequencies (TOFs) for CO<sub>2</sub> consumption over the Cu/In<sub>2</sub>O<sub>3</sub>, Ir/In<sub>2</sub>O<sub>3</sub>, Rh/In<sub>2</sub>O<sub>3</sub>, Pt/In<sub>2</sub>O<sub>3</sub>, and In<sub>2</sub>O<sub>3</sub> models between 300-450 K.

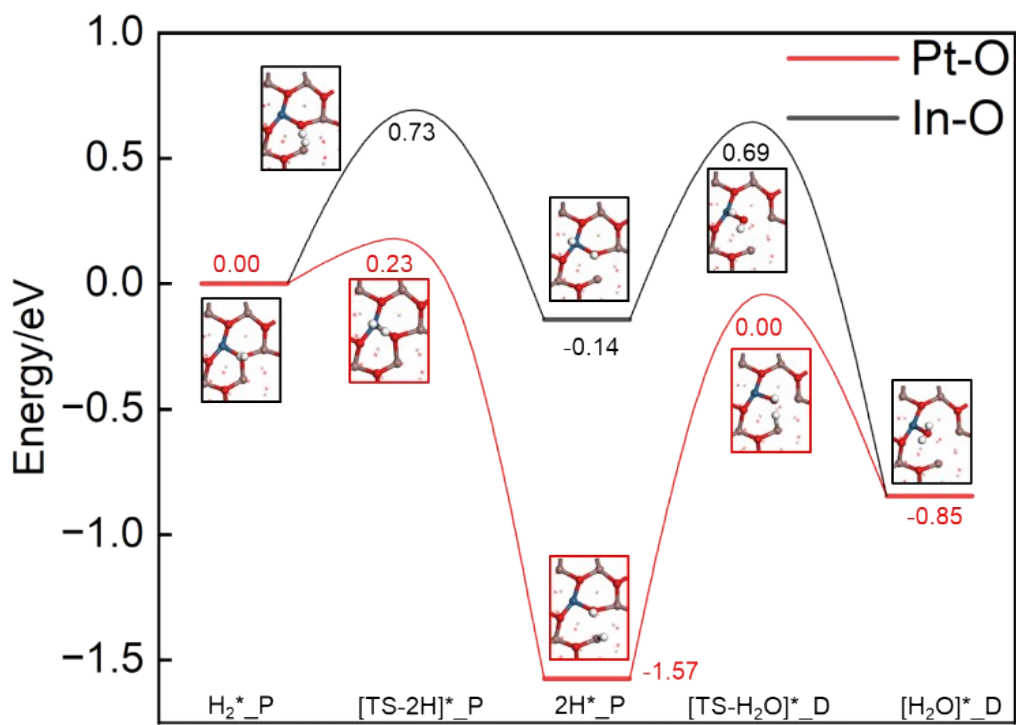

**Figure S8.** Energy profiles for  $O_V$  formation via  $H_2$  reduction on the Pt/ $In_2O_3$  model. The structures with the red border show  $O_V$  formation at the Pt-O site, whereas those with the black border structure show  $O_V$  formation at the In-O site.

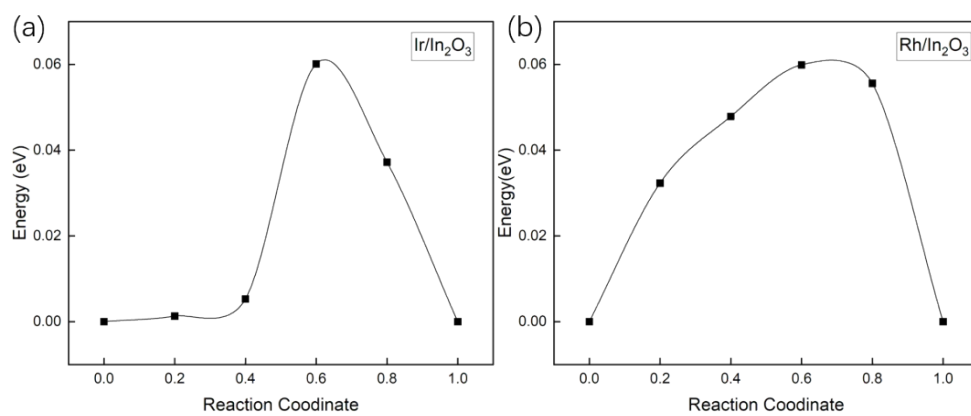

**Figure S9.** Potential energy profiles of the CI-NEB images for the Ir/In<sub>2</sub>O<sub>3</sub> (a) and Rh/In<sub>2</sub>O<sub>3</sub> (b)

models.

**Table S4.** The adsorption energy of CO<sub>2</sub> and CO on M<sub>7</sub>-O<sub>V6</sub> sites.

| E <sub>ads</sub> /eV                                                 | Pt    | Ir    | Pd    | Cu    | Rh    | Ni    | In <sub>2</sub> O <sub>3</sub> |
|----------------------------------------------------------------------|-------|-------|-------|-------|-------|-------|--------------------------------|
| E <sub>ads</sub> (M <sub>7</sub> -O <sub>V6</sub> -CO <sub>2</sub> ) | -1.46 | -1.10 | -0.65 | -0.50 | -0.82 | -0.35 | 0.13                           |
| E <sub>ads</sub> (M <sub>7</sub> -O <sub>V6</sub> -CO)               | -3.07 | -2.29 | -1.79 | -0.71 | -2.12 | -0.79 | -0.11                          |

**Table S5.** Energy data for O<sub>V</sub> formation via H<sub>2</sub> reduction of the M/In<sub>2</sub>O<sub>3</sub> surfaces.

| E/eV                     | Ni/In <sub>2</sub> O <sub>3</sub> | Pt/In <sub>2</sub> O <sub>3</sub> | Pd/In <sub>2</sub> O | Cu/In <sub>2</sub> O <sub>3</sub> | Rh/In <sub>2</sub> O | In <sub>2</sub> O | Ir/In <sub>2</sub> O |
|--------------------------|-----------------------------------|-----------------------------------|----------------------|-----------------------------------|----------------------|-------------------|----------------------|
|                          |                                   |                                   | 3                    |                                   | 3                    | 3                 | 3                    |
| H <sub>2</sub> _P        | 0.00                              | 0.00                              | 0.00                 | 0.00                              | 0.00                 | 0.00              | 0.00                 |
| [TS-2H]*_P               | 0.94                              | 0.73                              | 0.70                 | 0.66                              | 1.05                 | 1.08              | 0.75                 |
| 2H*_P                    | 0.46                              | -0.14                             | -0.21                | -0.30                             | 0.62                 | 0.64              | -0.13                |
| [TS-H <sub>2</sub> O]*_D | 1.17                              | 0.69                              | 0.60                 | 0.34                              | 1.44                 | 1.16              | 0.91                 |
| H <sub>2</sub> O*_D      | -0.88                             | -0.85                             | -1.13                | -1.32                             | 0.45                 | 0.25              | 0.27                 |

**Table S6.** Energy data for the direct dissociation of CO<sub>2</sub> on the M/In<sub>2</sub>O<sub>3</sub> surfaces.

| E/eV                  | Ni/In <sub>2</sub> O | Pt/In <sub>2</sub> O | Pd/In <sub>2</sub> O | Cu/In <sub>2</sub> O | Rh/In <sub>2</sub> O | In <sub>2</sub> O <sub>3</sub> | Ir/In <sub>2</sub> O |
|-----------------------|----------------------|----------------------|----------------------|----------------------|----------------------|--------------------------------|----------------------|
|                       | 3                    | 3                    | 3                    | 3                    | 3                    |                                | 3                    |
| *_D                   | 0.00                 | 0.00                 | 0.00                 | 0.00                 | 0.00                 | 0.00                           | 0.00                 |
| bt-CO <sub>2</sub> _D | -0.43                | -1.46                | -0.65                | -0.50                | -1.17                | 0.13                           | -1.10                |
| [TS-CO-O]*_D          | 0.32                 | -0.48                | 0.67                 | 1.42                 | -1.16                | 0.45                           | -1.02                |
| CO*_P                 | 0.30                 | -1.11                | 0.35                 | 1.31                 | -1.94                | -0.20                          | -2.37                |
| *_P+CO(g)             | 0.83                 | 0.11                 | 0.86                 | 1.45                 | -0.23                | -0.04                          | -0.35                |

**Table S7.** Energy data for the direct dissociation of CO<sub>2</sub> on the M/In<sub>2</sub>O<sub>3</sub> surfaces.

| E/eV                       | Ni/In <sub>2</sub> O | Pt/In <sub>2</sub> O | Pd/In <sub>2</sub> O | Cu/In <sub>2</sub> O | Rh/In <sub>2</sub> O <sub>3</sub> | In <sub>2</sub> O <sub>3</sub> | Ir/In <sub>2</sub> O |
|----------------------------|----------------------|----------------------|----------------------|----------------------|-----------------------------------|--------------------------------|----------------------|
|                            | 3                    | 3                    | 3                    | 3                    |                                   |                                | 3                    |
| *_D                        | 0.00                 | 0.00                 | 0.00                 | 0.00                 | 0.00                              | 0.00                           | 0.00                 |
| bt-CO <sub>2</sub> _D      | -0.43                | -1.46                | -0.65                | -0.50                | -1.17                             | 0.13                           | -1.10                |
| [bt-CO <sub>2</sub> +H]*_D | -2.90                | -2.52                | -1.69                | -1.30                | -2.90                             | -0.66                          | -0.06                |
| [CO+OH]*_D                 | -1.20                | -2.89                | -1.63                | -0.31                | -2.49                             | -0.81                          | -3.07                |
| OH*_D+CO(g)                | -0.22                | -0.92                | -0.45                | -0.08                | -0.86                             | -0.69                          | -1.07                |

**Table S8.** Elementary steps of the RWGS reaction on the M/In<sub>2</sub>O<sub>3</sub> (M = Cu, Ir, Rh) models and the In<sub>2</sub>O<sub>3</sub>(111) surface, where “s” and “t” denote the O<sub>V</sub> and “hydrogen reservoir” sites, respectively.

|     |                                                                                                                                           |
|-----|-------------------------------------------------------------------------------------------------------------------------------------------|
| R1  | CO <sub>2_g</sub> + * <sub>s</sub> -> CO <sub>2_s</sub> #ln-CO2                                                                           |
| R2  | CO <sub>2_g</sub> + * <sub>s</sub> -> O <sub>2</sub> C <sub>s</sub> #bt-CO2                                                               |
| R3  | H <sub>2_g</sub> + 2* <sub>t</sub> <-> H-H <sub>t</sub> + * <sub>t</sub> -> 2H <sub>t</sub>                                               |
| R4  | H <sub>2_g</sub> + O <sub>s</sub> + * <sub>t</sub> <-> OH-H <sub>s</sub> + * <sub>t</sub> -> OH <sub>s</sub> + H <sub>t</sub>             |
| R5  | OH <sub>s</sub> + H <sub>t</sub> <-> H-OH <sub>s</sub> + * <sub>t</sub> -> H <sub>2</sub> O <sub>s</sub> + * <sub>t</sub>                 |
| R6  | H <sub>2</sub> O <sub>s</sub> -> H <sub>2</sub> O <sub>g</sub> + * <sub>s</sub>                                                           |
| R7  | O <sub>s</sub> + H <sub>t</sub> -> OH <sub>s</sub> + * <sub>t</sub>                                                                       |
| R8  | CO <sub>2_s</sub> + * <sub>s</sub> <-> CO-O <sub>s</sub> + * <sub>s</sub> -> CO <sub>s</sub> + O <sub>s</sub>                             |
| R9  | CO <sub>s</sub> -> CO <sub>g</sub> + * <sub>s</sub>                                                                                       |
| R10 | O <sub>2</sub> C <sub>s</sub> + H <sub>t</sub> <-> O <sub>2</sub> C-H <sub>s</sub> + * <sub>t</sub> -> COOH <sub>s</sub> + * <sub>t</sub> |
| R11 | COOH <sub>s</sub> + * <sub>s</sub> <-> CO-OH <sub>s</sub> + * <sub>s</sub> -> CO <sub>s</sub> + OH <sub>s</sub>                           |
| R12 | CO <sub>s</sub> -> CO <sub>g</sub> + * <sub>s</sub>                                                                                       |
| R13 | CO <sub>g</sub> + * <sub>s</sub> -> CO <sub>s</sub>                                                                                       |

**Table S9.** The absorption energies of the [InH-OH]\* and [MH-OH]\* structures.

| E <sub>ads</sub> /eV | Cu    | Ni    | Pt    | Ir    | Pd    | Rh    |
|----------------------|-------|-------|-------|-------|-------|-------|
| [InH-OH]*            | -0.30 | 0.46  | -0.14 | -0.13 | -0.21 | 0.62  |
| [MH-OH]*             | -0.98 | -0.79 | -1.57 | -1.03 | -0.93 | -0.98 |

**Table S10.** The C-O bond lengths for the Rh/In<sub>2</sub>O<sub>3</sub> and Ir/In<sub>2</sub>O<sub>3</sub> models during CO<sub>2</sub> direct dissociation.

| C-O lengths/Å                     | IS   | TS   | FS   |
|-----------------------------------|------|------|------|
| Rh/In <sub>2</sub> O <sub>3</sub> | 1.50 | 1.66 | 2.61 |
| Ir/In <sub>2</sub> O <sub>3</sub> | 1.37 | 1.60 | 2.85 |

**Table S11.** Optimized fractional coordinates of the single-atom metal-doped (M=Pt, Cu, Pd, Ir, Ni, Rh) c-In<sub>2</sub>O<sub>3</sub>(111) surfaces.

**The perfect Pt<sub>7</sub> doped c-In<sub>2</sub>O<sub>3</sub>(111) surface**

O In Pt In

|                     |                     |                     |  |
|---------------------|---------------------|---------------------|--|
| 1.0000000000000000  |                     |                     |  |
| 14.4442996979000000 | 0.0000000000000000  | 0.0000000000000000  |  |
| -7.2221498489000000 | 12.5091304781999995 | 0.0000000000000000  |  |
| 0.0000000000000000  | 0.0000000000000000  | 17.9855003356999994 |  |

|    |    |    |    |
|----|----|----|----|
| O  | In | Pt | In |
| 72 | 27 | 1  | 20 |

Direct

|                    |                    |                    |
|--------------------|--------------------|--------------------|
| 0.8411362534843883 | 0.6134230080661204 | 0.4573599301542578 |
| 0.5156336877726424 | 0.9527096811292104 | 0.2893817490210620 |
| 0.1709475456762715 | 0.2790844420081092 | 0.6194640596796473 |
| 0.7934072485137235 | 0.9613388101064483 | 0.2975170440717287 |
| 0.4713901657165808 | 0.2945197591691818 | 0.6501578078287430 |
| 0.1330121164608386 | 0.6253287486900587 | 0.4697491316995526 |
| 0.3006612426001081 | 0.7316919696045410 | 0.3001114678592239 |
| 0.9785524110449739 | 0.0704500379294203 | 0.6354456649216317 |
| 0.6405996225561799 | 0.4065316345212386 | 0.4679538736304230 |
| 0.5290064502729652 | 0.2100513076186637 | 0.2708455259145048 |
| 0.1832800059019956 | 0.5389426440151237 | 0.6106117711516028 |
| 0.8582375013440690 | 0.8829884193535905 | 0.4408082822835860 |
| 0.8878757324919911 | 0.1299272868766434 | 0.4556135359749201 |
| 0.5479338636598949 | 0.4632769123821602 | 0.2909479508919190 |
| 0.2214636103828916 | 0.7902705474865216 | 0.6206695742660430 |
| 0.5389874430929825 | 0.7320368006057153 | 0.2978471144771434 |
| 0.2066785180238924 | 0.0760585350359662 | 0.6550805834011745 |
| 0.8746533183180367 | 0.4076085718032424 | 0.4694584521842213 |
| 0.7677235383423090 | 0.4687215822163534 | 0.3005405675762426 |
| 0.4330246717869980 | 0.8018487925083401 | 0.6449944741997166 |
| 0.0951076298287629 | 0.1343343344171066 | 0.4640072294620778 |
| 0.2908887453082524 | 0.2192450829315754 | 0.2704719621372916 |
| 0.9581566400834253 | 0.5435542469755896 | 0.6114343010965506 |
| 0.6181365192265318 | 0.8744170574014164 | 0.4406611248081581 |
| 0.3725870041645473 | 0.6585461470398052 | 0.4571770950125815 |
| 0.0375046835743333 | 0.9842531317714355 | 0.2891371934343290 |
| 0.7089777968523762 | 0.3290184214451137 | 0.6212050354287508 |
| 0.7678162286216297 | 0.7070617008189376 | 0.2986849205249744 |
| 0.4240633282915800 | 0.0265630829025267 | 0.6528962285447459 |
| 0.0916705771321147 | 0.3658680233065598 | 0.4691925066413626 |

|                    |                    |                    |
|--------------------|--------------------|--------------------|
| 0.0316273695149578 | 0.1994433414058755 | 0.2992773054023606 |
| 0.6891549371966975 | 0.5256088536782463 | 0.6399510682413433 |
| 0.3651827560021231 | 0.8589636049799866 | 0.4670420512644856 |
| 0.2811864502723702 | 0.9708958032562427 | 0.2696988763027236 |
| 0.9554295936643551 | 0.3157326044622785 | 0.6110844231319721 |
| 0.6250571749657962 | 0.6453248998392801 | 0.4429393288515143 |
| 0.2273395068386200 | 0.3181178204017576 | 0.3787056868998671 |
| 0.8828976187687266 | 0.6489012993792097 | 0.7087854079892484 |
| 0.5581239607123839 | 0.9847139012578107 | 0.5447567802023010 |
| 0.2671742523925608 | 0.9741198978433289 | 0.5312587763823058 |
| 0.9283724608893059 | 0.3063954930227131 | 0.3455136383967335 |
| 0.5989985641663231 | 0.6453468266630557 | 0.7005170599649787 |
| 0.7586880379052018 | 0.1943263106466445 | 0.5349503043015270 |
| 0.4228786944324475 | 0.5293351704937728 | 0.3646630222664553 |
| 0.1007064335871417 | 0.8666542310089969 | 0.6999374118255556 |
| 0.5453286805457359 | 0.7240608067306551 | 0.5608621290206974 |
| 0.2159670408130585 | 0.0589934484559777 | 0.3883278791465021 |
| 0.8698947258692358 | 0.3906532199700196 | 0.7301614190642138 |
| 0.1830255160522925 | 0.8096736460687743 | 0.3795443458088979 |
| 0.8520158352185300 | 0.1366592866848811 | 0.7092524414077206 |
| 0.5119666463152576 | 0.4729909005999053 | 0.5441774154807123 |
| 0.5261527486677208 | 0.1914750752474312 | 0.5308508310395001 |
| 0.1944626860115100 | 0.5225191835982819 | 0.3486627120524754 |
| 0.8630381220038055 | 0.8685215697188057 | 0.7025100942684041 |
| 0.3041810644771222 | 0.4636012536935445 | 0.5342075463670671 |
| 0.9713533094523294 | 0.7932697595359519 | 0.3641516657261745 |
| 0.6329078152421913 | 0.1331578956250848 | 0.7012006792431270 |
| 0.7828160325119013 | 0.7269870056163779 | 0.5590369060456164 |
| 0.4401953225685346 | 0.0548212423399140 | 0.3892142348376506 |
| 0.1095344572461191 | 0.3802616065072875 | 0.7289027671576936 |
| 0.6903651778481306 | 0.2730587310853873 | 0.3799635831479358 |
| 0.3671601988456039 | 0.6100047145060489 | 0.7041655374186803 |
| 0.0296461042035332 | 0.9416915492494008 | 0.5434615849866504 |
| 0.3068151171593232 | 0.2317611627629510 | 0.5304848788303065 |
| 0.9775930238366073 | 0.5718996272080403 | 0.3477105607869456 |
| 0.6366635124017207 | 0.8913107796913189 | 0.6938310244646202 |
| 0.0359021536498389 | 0.7405586676135675 | 0.5351998252819939 |
| 0.7065336370406039 | 0.0773921485163662 | 0.3640310764233678 |
| 0.3650882015910245 | 0.3970090594634780 | 0.7011128785267378 |
| 0.7772776283298789 | 0.9588431819066243 | 0.5563991459009842 |
| 0.4446024601314642 | 0.2845879457525669 | 0.3904092100939641 |
| 0.1177615843507982 | 0.6276533846544106 | 0.7300127825870096 |
| 0.1404504835353303 | 0.1455301423903703 | 0.3319512896869060 |
| 0.8101671426990813 | 0.4826394129514772 | 0.6754365491179882 |

|                    |                    |                    |
|--------------------|--------------------|--------------------|
| 0.5988509051430617 | 0.6239465262800380 | 0.3220817782367367 |
| 0.2565714108623677 | 0.9535378460984730 | 0.6528273386505429 |
| 0.9249130407702888 | 0.2903218335115374 | 0.4950614254435999 |
| 0.4718631787235202 | 0.8124785199748525 | 0.5114296218858746 |
| 0.3544201690386812 | 0.8946487720428371 | 0.3318903755085916 |
| 0.0177105047060473 | 0.2296540878026924 | 0.6742498132097207 |
| 0.8769470680805025 | 0.8754744599566450 | 0.3208167996009353 |
| 0.5452978026313317 | 0.2010400937734123 | 0.6524091059713799 |
| 0.2087690617346148 | 0.5340004650880108 | 0.4939196087838079 |
| 0.6883983431046529 | 0.5601309054939715 | 0.5146981493266325 |
| 0.6052727891149977 | 0.3597137586963542 | 0.3339545004123217 |
| 0.2664225760362763 | 0.6844738647711661 | 0.6747819679218409 |
| 0.6251155811478055 | 0.9014174814319842 | 0.3203943673552783 |
| 0.2988933454787390 | 0.2425686258992032 | 0.6522652039268476 |
| 0.9647980208894273 | 0.5745778937440809 | 0.4952068607438023 |
| 0.9426788441396371 | 0.0310014962889451 | 0.5118678885413089 |
| 0.9308700735156473 | 0.7891870743224815 | 0.4869714259724571 |
| 0.4749778867634379 | 0.3097477637276070 | 0.5071624155203018 |
| 0.1448037871412405 | 0.6456805900446978 | 0.3479996347356851 |
| 0.8049865950956336 | 0.9771094151413517 | 0.6763373583804513 |
| 0.5881204056698243 | 0.1188315366547897 | 0.3257739932658661 |
| 0.2563167434878967 | 0.4485709333338952 | 0.6631979806509187 |
| 0.7118029695676945 | 0.0417618588368997 | 0.4864460506947415 |
| 0.1908898800038726 | 0.0642088533699049 | 0.5039970985899141 |
| 0.8543295554536836 | 0.3993506175927625 | 0.3476673519303750 |
| 0.5153031686064397 | 0.7276711679001187 | 0.6774428769490211 |
| 0.3818929711554063 | 0.3692109663243194 | 0.3262295908177368 |
| 0.0444693929832403 | 0.7047577820099880 | 0.6665291833199063 |
| 0.4580697137973655 | 0.5698668887015005 | 0.4871608378186656 |
| 0.4351422597112926 | 0.0250476695091647 | 0.5054206137437846 |
| 0.1003862953382105 | 0.3549033219505460 | 0.3473936286585347 |
| 0.7710995420418036 | 0.7005011476721351 | 0.6793354837199815 |
| 0.1308465292217053 | 0.9114650367238130 | 0.3250136991237171 |
| 0.7947474154399641 | 0.2414094109703268 | 0.6672435572789839 |
| 0.7002146286453126 | 0.3006514876308181 | 0.5004750555649977 |
| 0.7026732046189490 | 0.8024884765477531 | 0.4999069763109072 |
| 0.1996115797786547 | 0.2986054745310381 | 0.4988559648958290 |
| 0.2002827289852865 | 0.7996203286592041 | 0.5002026088693560 |
| 0.8708591315031438 | 0.1284629780705380 | 0.3344445406685141 |
| 0.5248659476226164 | 0.4767636214086206 | 0.6654318828871265 |
| 0.3723901379724297 | 0.6426871820183059 | 0.3352033683627065 |
| 0.0293648892527142 | 0.9564377627515264 | 0.6647620161622405 |
| 0.3669196396091873 | 0.1332136851373596 | 0.3150775983752768 |
| 0.0314320533597685 | 0.4653300717786492 | 0.6852663688218530 |



0.8570009801449080 0.6293008011696060 0.3358009177187191  
0.5475290854561189 0.9729923030352614 0.6656248080501207

**The perfect Pt<sub>7</sub>-O<sub>V6</sub> surface**

O In Pt In

1.000000000000000  
14.4442996979000000 0.0000000000000000 0.0000000000000000  
-7.2221498489000000 12.5091304781999995 0.0000000000000000  
0.0000000000000000 0.0000000000000000 17.9855003356999994

O In Pt In  
71 27 1 20

Direct

0.8403715498000651 0.6136251742207847 0.4564917501744061  
0.5160447169406837 0.9528957157892695 0.2898417389935328  
0.1703833046008539 0.2782862620143632 0.6189951023902858  
0.7925325614953863 0.9614584639706660 0.2988402465883944  
0.4680140205016773 0.2907296139490607 0.6513890403469696  
0.1334105309048932 0.6257477951262727 0.4693184855448344  
0.3008781790168572 0.7311282986905446 0.3002652101280100  
0.9775693288394462 0.0699144916167744 0.6357941356458799  
0.6411578598228416 0.4078360214505930 0.4698955844618312  
0.5297705075120382 0.2099772997200313 0.2684759365666500  
0.1842173071762490 0.5391127658495156 0.6099762341793875  
0.8574249611667751 0.8822855751928159 0.4414394916273599  
0.8873790589828635 0.1306295616108584 0.4565889147314747  
0.5477531576801490 0.4638950336018270 0.2898171986541628  
0.2162515095010498 0.7890953224039771 0.6190517748414253  
0.5388743155156397 0.7320430910013446 0.2989222819532963  
0.2060934633039028 0.0749309595953506 0.6582337059096326  
0.8744989852830679 0.4073362131513856 0.4692591536068944  
0.7679625317726350 0.4686604040474076 0.2991545988615709  
0.4221189417755936 0.8103838264010508 0.6338133810444189  
0.0946955396787359 0.1338190621753212 0.4629132718310985  
0.2913049849995367 0.2198862823955885 0.2690176498549621  
0.9582899386710128 0.5422557427493836 0.6111500636215695  
0.6163354736443271 0.8727923095344441 0.4431723791390780  
0.3739711463957045 0.6589124774682285 0.4591264965719423  
0.0368431062080352 0.9841460019262880 0.2879766016251569  
0.7068971955449586 0.3329739872032660 0.6226858688983541  
0.7669464670675582 0.7069549689213074 0.2993889689664261  
0.4225713051756765 0.0286742263657979 0.6560190789251792  
0.0916819361993300 0.3653753685588277 0.4689556022027332  
0.0310021079139910 0.1990422770503693 0.2991842524409722  
0.6848172949222309 0.5371381020640881 0.6564410061020719  
0.3651040361385146 0.8602698245636017 0.4635901893421789

|                    |                    |                    |
|--------------------|--------------------|--------------------|
| 0.2814480630253807 | 0.9703745719168579 | 0.2680495808174808 |
| 0.9565518174999496 | 0.3156454144622748 | 0.6119929171495284 |
| 0.6246804566433750 | 0.6463775789173002 | 0.4444051799156220 |
| 0.2273702102745134 | 0.3177425633960184 | 0.3780013722463959 |
| 0.8897818149720006 | 0.6466392129496505 | 0.7106281451849715 |
| 0.5585857335823523 | 0.9886657072436718 | 0.5431756765235360 |
| 0.2678298751438388 | 0.9751527229504616 | 0.5309681798625741 |
| 0.9280848906923563 | 0.3063447343423794 | 0.3443751806783941 |
| 0.7594134624949384 | 0.1965976686090049 | 0.5370923280809240 |
| 0.4237020573073866 | 0.5291749280271113 | 0.3665354336264646 |
| 0.0987619024920070 | 0.8653157043811809 | 0.6996456835805731 |
| 0.5466897129367093 | 0.7213710051434491 | 0.5655435703915210 |
| 0.2161835221702839 | 0.0590846225643089 | 0.3861852476927899 |
| 0.8713093868757007 | 0.3889853252626906 | 0.7308577662810039 |
| 0.1817937740456727 | 0.8094910354605966 | 0.3780106739928870 |
| 0.8526890454681173 | 0.1367104691400216 | 0.7109207889236114 |
| 0.5136558645785255 | 0.4718712231607022 | 0.5455133440214247 |
| 0.5263311863142756 | 0.1920558479887326 | 0.5309526100178654 |
| 0.1951999602818490 | 0.5224497551872780 | 0.3501078325982328 |
| 0.8648666378361034 | 0.8701417998676266 | 0.7045736467562523 |
| 0.3043063433608983 | 0.4622482992800523 | 0.5346678449581744 |
| 0.9711448728605135 | 0.7937102084453292 | 0.3628959119575156 |
| 0.6331001139951199 | 0.1315241761717366 | 0.6996104901381416 |
| 0.7840564311755305 | 0.7253726974735413 | 0.5602608669124132 |
| 0.4399068151090644 | 0.0569858826419933 | 0.3875941596787417 |
| 0.1112364200275305 | 0.3801695827458438 | 0.7293597971871011 |
| 0.6893108199634067 | 0.2738694830446595 | 0.3800388152097498 |
| 0.3705361364476336 | 0.6098833379981953 | 0.7021203186702138 |
| 0.0301935514165406 | 0.9423592290969548 | 0.5432841014938952 |
| 0.3064094651896181 | 0.2305734250796937 | 0.5301293991500057 |
| 0.9771951695541687 | 0.5715274794206148 | 0.3476236048567387 |
| 0.6346846641464734 | 0.8888859592756809 | 0.6932759521275468 |
| 0.0349882813742283 | 0.7399658342125629 | 0.5334221335629107 |
| 0.7058702340137106 | 0.0776547196662104 | 0.3658470468288094 |
| 0.3622048523120304 | 0.3936785557875546 | 0.7034825496149901 |
| 0.7772581202698702 | 0.9592685586157248 | 0.5572004922484405 |
| 0.4457707854664129 | 0.2849457556102050 | 0.3884029372596043 |
| 0.1220938135624288 | 0.6277395386805343 | 0.7295691441798839 |
| 0.1404591993853945 | 0.1455718358962276 | 0.3303283337686416 |
| 0.8119676020408627 | 0.4813270586937061 | 0.6780074562464434 |
| 0.5984632365087287 | 0.6240793164876869 | 0.3226272231879254 |
| 0.2557565589102758 | 0.9526693266646878 | 0.6530563212968029 |
| 0.9255429466173877 | 0.2910984779860853 | 0.4961726035401252 |
| 0.4692871482942056 | 0.8126603681786985 | 0.5142050746119269 |

|                    |                    |                    |
|--------------------|--------------------|--------------------|
| 0.3544303347444346 | 0.8944423274950720 | 0.3317597551427405 |
| 0.0181372951846980 | 0.2293313868323354 | 0.6753132124222400 |
| 0.8764013640678224 | 0.8757166062971203 | 0.3208286086195668 |
| 0.5443902223724439 | 0.1993235501211992 | 0.6528099616276904 |
| 0.2088173097785891 | 0.5337515422752588 | 0.4933173488140807 |
| 0.6881160265367874 | 0.5619460785454823 | 0.5132246686864891 |
| 0.6053160573042747 | 0.3594963282412199 | 0.3306419858749082 |
| 0.2695652974309481 | 0.6868899959311564 | 0.6717137017749358 |
| 0.6243892830048547 | 0.9011007256745580 | 0.3225325436825616 |
| 0.2949639552678819 | 0.2395036611832228 | 0.6521488025404397 |
| 0.9647485755231187 | 0.5744293486804187 | 0.4947130895101058 |
| 0.9427121233642917 | 0.0314400281417770 | 0.5119764435950075 |
| 0.9321760195593223 | 0.7901098273936056 | 0.4853402503453738 |
| 0.4740566034094387 | 0.3079306889302066 | 0.5046549360763877 |
| 0.1446789675793134 | 0.6455305628413780 | 0.3475012488986831 |
| 0.8033327732653531 | 0.9773923955165523 | 0.6769689072871093 |
| 0.5883123967586344 | 0.1192389478007990 | 0.3254702260549648 |
| 0.2566890503208940 | 0.4488833975769773 | 0.6628429003969424 |
| 0.7112335412534951 | 0.0428806007763832 | 0.4875126188026266 |
| 0.1905959958029592 | 0.0633477565285437 | 0.5014775266007451 |
| 0.8539789888649744 | 0.3989930064110866 | 0.3472585074365822 |
| 0.5187246514674341 | 0.7249303393604217 | 0.6779386210533612 |
| 0.3817839871534213 | 0.3696509617327664 | 0.3254878367320712 |
| 0.0489157316323629 | 0.7043631480344245 | 0.6654073938941469 |
| 0.4580795361362925 | 0.5696004954928775 | 0.4891369796541502 |
| 0.4350838947672194 | 0.0259576450741799 | 0.5032356184648984 |
| 0.1000907510671938 | 0.3546913288594709 | 0.3469355865372031 |
| 0.7900894640504161 | 0.7071102819125554 | 0.6792764521319161 |
| 0.1307028097219445 | 0.9113526913731115 | 0.3227692860800896 |
| 0.7949563574604216 | 0.2403300645526786 | 0.6676313867192708 |
| 0.7006015450723472 | 0.3018538907833102 | 0.5010194592554917 |
| 0.7022639212650743 | 0.8032237286543652 | 0.5015754919873753 |
| 0.1991119525148294 | 0.2978710943742829 | 0.4981577040440644 |
| 0.2002952652996015 | 0.8004606950416157 | 0.4986398360338568 |
| 0.8703248111664612 | 0.1287599869933513 | 0.3350792493103861 |
| 0.5182369703189070 | 0.4614887271273028 | 0.6657044178207058 |
| 0.3729203450659319 | 0.6429228189334215 | 0.3365833298288932 |
| 0.0323120954265227 | 0.9595337422856078 | 0.6648721121989470 |
| 0.3670705419673462 | 0.1330642342686253 | 0.3123929648587135 |
| 0.0335110721912509 | 0.4654790172460364 | 0.6855658882973011 |
| 0.8570004014377263 | 0.6292893497268068 | 0.3348418441766502 |
| 0.5428237107477885 | 0.9703501811568760 | 0.6641624359379242 |

### The perfect Pt<sub>7</sub>-O<sub>V6</sub>-bt-CO<sub>2</sub> surface

O In Pt In C O

|                      |                     |                    |    |   |   |
|----------------------|---------------------|--------------------|----|---|---|
| 1.000000000000000    |                     |                    |    |   |   |
| 14.4443000000000001  | 0.000000000000000   | 0.000000000000000  |    |   |   |
| -7.22214999999999965 | 12.5091307398835685 | 0.000000000000000  |    |   |   |
| 0.00000000000000011  | 0.00000000000000019 | 17.985499999999983 |    |   |   |
| O                    | In                  | Pt                 | In | C | O |
| 71                   | 27                  | 1                  | 20 | 1 | 2 |

Direct

|                    |                    |                    |
|--------------------|--------------------|--------------------|
| 0.8408735742006792 | 0.6133663102468976 | 0.4566343692593297 |
| 0.5151695304531070 | 0.9518224307745971 | 0.2906042738183337 |
| 0.1727653870871880 | 0.2797800136071363 | 0.6203793099387559 |
| 0.7923217269901232 | 0.9605068241502124 | 0.2991199469521336 |
| 0.4696344543104434 | 0.2892091636992317 | 0.6610824855320556 |
| 0.1334718478365275 | 0.6263462132968682 | 0.4692703771574824 |
| 0.3007459695422692 | 0.7308324379892378 | 0.3009057037090554 |
| 0.9776717283032823 | 0.0703392547393717 | 0.6363247996110236 |
| 0.6403003520681549 | 0.4056673421539510 | 0.4650414941778020 |
| 0.5295337114673362 | 0.2096967101489888 | 0.2686633109858889 |
| 0.1818316608277755 | 0.5384752661728367 | 0.6089295940551041 |
| 0.8554524355765599 | 0.8812883186647872 | 0.4429764093503405 |
| 0.8869220174672222 | 0.1285640516380136 | 0.4563868565462034 |
| 0.5478537278413322 | 0.4640079681137276 | 0.2906327121612068 |
| 0.2169197214052892 | 0.7910851549695531 | 0.6197062774476469 |
| 0.5389561988537590 | 0.7318857200707249 | 0.3001411171508415 |
| 0.2062305224309927 | 0.0771462267215152 | 0.6567940856868157 |
| 0.8741504952424533 | 0.4071290783742497 | 0.4691410880642830 |
| 0.7685354014781947 | 0.4687109776039098 | 0.2992747454113069 |
| 0.4252918077383733 | 0.8096711113818470 | 0.6351847516388677 |
| 0.0947647967503654 | 0.1345700951958992 | 0.4649341520225295 |
| 0.2901981571680288 | 0.2198978649171389 | 0.2688104059279227 |
| 0.9591889875752779 | 0.5428950993829256 | 0.6100915159936092 |
| 0.6166172153820521 | 0.8725688409101816 | 0.4440409901901349 |
| 0.3732065652137568 | 0.6587792853751367 | 0.4592276174477087 |
| 0.0359959558891336 | 0.9840955420095397 | 0.2896534672991551 |
| 0.7087773245312233 | 0.3276774669243766 | 0.6206090867997395 |
| 0.7664992273828560 | 0.7064482982504571 | 0.3003589039696550 |
| 0.4220713566357212 | 0.0292923745735383 | 0.6549046505160552 |
| 0.0914830360393004 | 0.3646826546322650 | 0.4693643265865403 |
| 0.0308313245960496 | 0.1989975156624212 | 0.2994550756355787 |
| 0.6957094724365589 | 0.5248075951280123 | 0.6366144107949255 |
| 0.3647235920786332 | 0.8598429457571231 | 0.4650909844266568 |
| 0.2805618371178844 | 0.9702985752211081 | 0.2689252888223749 |
| 0.9560796519902163 | 0.3139241280668014 | 0.6111937830507612 |

|                    |                    |                    |
|--------------------|--------------------|--------------------|
| 0.6247225933556575 | 0.6448806005561676 | 0.4460950931204397 |
| 0.2272456941215355 | 0.3173100419335184 | 0.3788203182127525 |
| 0.8884642864731026 | 0.6435933018619124 | 0.7135160152412828 |
| 0.5577583308440447 | 0.9892433562644410 | 0.5430493503609530 |
| 0.2672023002246650 | 0.9753889134536907 | 0.5309842078322443 |
| 0.9280161065435202 | 0.3056746721189751 | 0.3461754357561331 |
| 0.7591573256936099 | 0.1947826325294856 | 0.5351109754296945 |
| 0.4235006244932416 | 0.5289924788843767 | 0.3674892130800058 |
| 0.0982484456071283 | 0.8663120534695403 | 0.6996436288406204 |
| 0.5434367135453643 | 0.7193651981869983 | 0.5683582786538813 |
| 0.2159328790137581 | 0.0598343502897983 | 0.3873502250647769 |
| 0.8718385461356720 | 0.3881956298445586 | 0.7297151760274552 |
| 0.1816663488833027 | 0.8096903361674658 | 0.3785109511052115 |
| 0.8538295310562001 | 0.1370487542860349 | 0.7114249060500412 |
| 0.5131802945907611 | 0.4690658275574496 | 0.5456800637152868 |
| 0.5244570387467464 | 0.1930797086083252 | 0.5312946014953052 |
| 0.1946373629236106 | 0.5220194754963714 | 0.3507847089246849 |
| 0.8623466132327214 | 0.8676572511283441 | 0.7029468783214885 |
| 0.3039734623209589 | 0.4629883904543976 | 0.5346412873086149 |
| 0.9705964058260861 | 0.7934805119022956 | 0.3639924466073915 |
| 0.6333126164458559 | 0.1332804029973267 | 0.7013605677187840 |
| 0.7838724513816187 | 0.7259498047413860 | 0.5612959474203822 |
| 0.4396718510263881 | 0.0567854366084254 | 0.3878372132926034 |
| 0.1125940313582100 | 0.3813995901411611 | 0.7286106346631448 |
| 0.6899253697456554 | 0.2723997061047973 | 0.3790375928088996 |
| 0.3607178547045071 | 0.6147347302519592 | 0.7050621605442918 |
| 0.0298127926855747 | 0.9422241897709863 | 0.5437768348469051 |
| 0.3086141134610361 | 0.2319114723376403 | 0.5314894979974250 |
| 0.9774164708941087 | 0.5716028259523148 | 0.3480922523422199 |
| 0.6337926942880138 | 0.8996067158413560 | 0.6974819890273067 |
| 0.0346949462914130 | 0.7403022160255013 | 0.5340618080209742 |
| 0.7056911063289348 | 0.0765063837943599 | 0.3651953471707882 |
| 0.3707131206807959 | 0.4021039335140061 | 0.6986459324772626 |
| 0.7759875950291619 | 0.9586672861878082 | 0.5590923279605813 |
| 0.4437445668812131 | 0.2835065551241266 | 0.3867494568199403 |
| 0.1182894633079598 | 0.6273429707335602 | 0.7290451275666445 |
| 0.1403488421059854 | 0.1457166483783212 | 0.3312533587485259 |
| 0.8130420201254294 | 0.4790601886440656 | 0.6747145964054956 |
| 0.5981323631521509 | 0.6236101814082947 | 0.3246894314033901 |
| 0.2549893241559646 | 0.9545491885704943 | 0.6529387471276898 |
| 0.9249558945256323 | 0.2899685181041206 | 0.4952674164784872 |
| 0.4696923071110384 | 0.8118058253717514 | 0.5149057196391832 |
| 0.3538970361506332 | 0.8942543812823283 | 0.3325426886716973 |
| 0.0195593385958500 | 0.2302065607545004 | 0.6752505531533788 |

|                    |                    |                    |
|--------------------|--------------------|--------------------|
| 0.8755572322165600 | 0.8749573669365618 | 0.3225280640424425 |
| 0.5462122668526052 | 0.2005577333553497 | 0.6531445541566160 |
| 0.2083788086455708 | 0.5336019289962002 | 0.4929865308883463 |
| 0.6893132587330181 | 0.5587143086714818 | 0.5138845949011747 |
| 0.6056085187645839 | 0.3595656096844398 | 0.3310480957505585 |
| 0.2651678965276599 | 0.6865420010622708 | 0.6713808098801267 |
| 0.6242422403902161 | 0.9005906786904437 | 0.3232885707554413 |
| 0.2986685245104070 | 0.2434860726393332 | 0.6535450850710937 |
| 0.9650581917651422 | 0.5745450204939609 | 0.4941262485914025 |
| 0.9416679790459430 | 0.0303242925922883 | 0.5129825038245445 |
| 0.9305672777122499 | 0.7896128078366373 | 0.4866813113007533 |
| 0.4739109453431207 | 0.3085732190463572 | 0.5016351686774766 |
| 0.1447976891517807 | 0.6457223068816216 | 0.3477907779285858 |
| 0.8029401951546195 | 0.9770887577386584 | 0.6786806892629653 |
| 0.5877615574011469 | 0.1183562028717786 | 0.3251332396867086 |
| 0.2599993235540041 | 0.4527528643588750 | 0.6629681191949544 |
| 0.7108101705337524 | 0.0412864460321764 | 0.4874755428619750 |
| 0.1906085073987076 | 0.0645923815532182 | 0.5031133451102425 |
| 0.8540878679474933 | 0.3987938141901938 | 0.3474427132033970 |
| 0.5108737845680661 | 0.7401240550111142 | 0.6898999159335927 |
| 0.3813015126453539 | 0.3700481228703241 | 0.3250687856191551 |
| 0.0467444192737013 | 0.7044995052914195 | 0.6659477983337683 |
| 0.4591477837569169 | 0.5708817072646557 | 0.4920690971597030 |
| 0.4344891295625553 | 0.0262470408836689 | 0.5034436336361856 |
| 0.1001294946437205 | 0.3542096686378079 | 0.3477491805487199 |
| 0.7887101611267684 | 0.7010856695617215 | 0.6793200757910323 |
| 0.1302312487157652 | 0.9118383489939063 | 0.3242803472259452 |
| 0.7951699959130546 | 0.2390840107242881 | 0.6671438072997687 |
| 0.6997438422342214 | 0.3001171361198398 | 0.4998628013339705 |
| 0.6997390408599780 | 0.8008221377016973 | 0.5051924016776805 |
| 0.1997538897995930 | 0.2984648806676803 | 0.4995038243190063 |
| 0.1998153328780262 | 0.8007314435324364 | 0.4991028334728644 |
| 0.8701219493240008 | 0.1275792681881604 | 0.3352451890004003 |
| 0.5298985987138126 | 0.4607809615521683 | 0.6654587742941157 |
| 0.3730779710133156 | 0.6427388536822172 | 0.3375776870936919 |
| 0.0301898267174748 | 0.9589267384384493 | 0.6652350763766307 |
| 0.3665127113183097 | 0.1331761981968958 | 0.3122267282779952 |
| 0.0335518701215832 | 0.4650489268246649 | 0.6846409108301044 |
| 0.8566940766017946 | 0.6291763910485467 | 0.3353311709274735 |
| 0.5417826956262883 | 0.9746634299668807 | 0.6640360376775225 |
| 0.5785445131779677 | 0.6800501747683586 | 0.7531745164116802 |
| 0.5775498662735213 | 0.6967200411663811 | 0.8195400619339176 |
| 0.6213457181431040 | 0.6237479066488900 | 0.7234553098578385 |

### The perfect Pt<sub>7</sub>-O<sub>V6</sub>-[CO<sub>2</sub>+H]\* surface

O In Pt In C O H

1.000000000000000

14.4443000000000001 0.000000000000000 0.000000000000000

-7.22214999999999965 12.5091307398835685 0.000000000000000

0.00000000000000011 0.0000000000000019 17.985499999999983

O In Pt In C O H

71 27 1 20 1 2 1

Direct

0.8428750299663466 0.6143677278451010 0.4553999433350231

0.5163852885098817 0.9522027441948524 0.2873905737175552

0.1722335422847517 0.2798326639072505 0.6206155960819724

0.7935501396086515 0.9607681932093428 0.2977011379499618

0.4714620799016335 0.2915828543187899 0.6587275947749086

0.1330803024298003 0.6250542482516548 0.4693159292570059

0.3016964120543388 0.7307021778517769 0.2994054604766782

0.9764359980628606 0.0692628693585107 0.6356099075499462

0.6409866575468354 0.4042353792898134 0.4656877067789563

0.5295444250780745 0.2095217385986727 0.2680208156369518

0.1819244881960486 0.5395463434255537 0.6103077831717681

0.8566153127274649 0.8812791986959924 0.4412916853203682

0.8870542962963168 0.1279594301524280 0.4558294049830688

0.5476883247973433 0.4623524381020909 0.2885483854606236

0.2212172903808303 0.7921311156207173 0.6189033251303678

0.5398932946673828 0.7310702626989499 0.2988600699774610

0.2060792041028713 0.0762636184352853 0.6598912144714703

0.8737615622861490 0.4067449513918995 0.4694129211011424

0.7690959555340440 0.4686519073297878 0.2991567586165894

0.4273927859381352 0.8062781377996789 0.6392765229794164

0.0954264506342069 0.1343107478607590 0.4648154502006528

0.2909174933715865 0.2195637792785129 0.2688935855571517

0.9517306325385193 0.5479374443899715 0.6100926645967338

0.6179992155369877 0.8757777372849064 0.4406378374641908

0.3693564568717919 0.6569324818920138 0.4572408845716197

0.0375616761639019 0.9842674971114294 0.2886717471683282

0.7060076792143194 0.3236968885263439 0.6188579135910195

0.7692983308241935 0.7071532024534419 0.2966216246902044

0.4214891281136393 0.0277892645518355 0.6589947122746811

0.0927664391075603 0.3656958126248218 0.4694179698291586

0.0314427040540660 0.1991309724051929 0.2991952016086834

0.7017725419309773 0.5295308217858987 0.6385483771867019

0.3677469540193872 0.8583264018781320 0.4659739880619356

0.2815084781178969 0.9701773159565515 0.2677994988413686

0.9552858597459584 0.3160187242327975 0.6104908115714189

|                    |                    |                    |
|--------------------|--------------------|--------------------|
| 0.6300472718018749 | 0.6407846800025050 | 0.4406605087452733 |
| 0.2277605277587918 | 0.3168179011987131 | 0.3790458952122427 |
| 0.8865991452625147 | 0.6495174000710995 | 0.7220709610314426 |
| 0.5582106857291338 | 0.9866328367237526 | 0.5454539687800771 |
| 0.2691781779858949 | 0.9758133424483407 | 0.5309222006957299 |
| 0.9288401419245449 | 0.3058983623808887 | 0.3474543563823732 |
| 0.7593477687317721 | 0.1935419916151588 | 0.5338267374444464 |
| 0.4244449168196920 | 0.5285831987467521 | 0.3665161700728003 |
| 0.0955018760923719 | 0.8627501604796761 | 0.6971311851533002 |
| 0.5464415219839829 | 0.7162443190377437 | 0.5554308509662857 |
| 0.2168794747598171 | 0.0591876092723693 | 0.3865493838751090 |
| 0.8700302809713488 | 0.3890950417881837 | 0.7287398561254022 |
| 0.1840231887796665 | 0.8096487929869323 | 0.3778311382150686 |
| 0.8533693337885190 | 0.1369548998718452 | 0.7093084620293925 |
| 0.5166055916287231 | 0.4704615908983101 | 0.5466669437226824 |
| 0.5232744464356962 | 0.1902519419891838 | 0.5309175053644510 |
| 0.1944409179192200 | 0.5213526709637651 | 0.3470491951617948 |
| 0.8620869111888382 | 0.8671968793062900 | 0.7033100679039063 |
| 0.3058516565145674 | 0.4632736779689785 | 0.5354646950056298 |
| 0.9724069168430209 | 0.7938042080889831 | 0.3633663972555674 |
| 0.6330189980303622 | 0.1329189562470062 | 0.7013495038205726 |
| 0.7851163093842227 | 0.7256115470906874 | 0.5597872072534030 |
| 0.4408019661808177 | 0.0550262785868419 | 0.3867740271118257 |
| 0.1102953816959096 | 0.3807584848352641 | 0.7286393270426751 |
| 0.6900738743718411 | 0.2721025674460267 | 0.3778292495276195 |
| 0.3548920710138654 | 0.6125897950123086 | 0.7145849855695877 |
| 0.0307908790333301 | 0.9420776484191706 | 0.5429402230492766 |
| 0.3084883915583874 | 0.2308816464858300 | 0.5321299276459096 |
| 0.9782456301374427 | 0.5717232837384958 | 0.3486135326551099 |
| 0.6335625335457367 | 0.8994990114806962 | 0.7043416353378837 |
| 0.0377624907591321 | 0.7415669876261179 | 0.5327286100781660 |
| 0.7068376197677962 | 0.0777816955057485 | 0.3631082794464108 |
| 0.3686567402373778 | 0.4001624684830105 | 0.6998842691506106 |
| 0.7751904968198896 | 0.9563637395408794 | 0.5580356257584770 |
| 0.4445962883762741 | 0.2836812069190117 | 0.3876150895915093 |
| 0.1136916080544474 | 0.6277255785961174 | 0.7272744995718636 |
| 0.1408955383761578 | 0.1456616645137170 | 0.3309885837221511 |
| 0.8064958102999370 | 0.4723412453916228 | 0.6723879279040413 |
| 0.5998175094618198 | 0.6226940622816532 | 0.3216365175789533 |
| 0.2556064591675422 | 0.9550224987424625 | 0.6527628773215339 |
| 0.9253690407708456 | 0.2896997940661133 | 0.4937976456295761 |
| 0.4718010702312884 | 0.8077815004465200 | 0.5172435750376578 |
| 0.3555478537803303 | 0.8937966090497875 | 0.3303332913011405 |
| 0.0188658309056862 | 0.2301456974936608 | 0.6740240964914929 |



|                    |                    |                    |
|--------------------|--------------------|--------------------|
| 0.8768083940892480 | 0.8752005338347789 | 0.3204940414851470 |
| 0.5434636086777124 | 0.1976229245396140 | 0.6531248290905634 |
| 0.2099874699904880 | 0.5339487181591011 | 0.4944454829700609 |
| 0.6906692408348578 | 0.5584278174038126 | 0.5119122188705193 |
| 0.6056941666132507 | 0.3592256725803971 | 0.3306142470690021 |
| 0.2665120050437715 | 0.6866573422692773 | 0.6748268087886768 |
| 0.6249265245818435 | 0.9006794678502830 | 0.3209486721271731 |
| 0.2981828005089158 | 0.2430467331930353 | 0.6539925867430838 |
| 0.9650110436387614 | 0.5746061106234162 | 0.4914103141631377 |
| 0.9413140847058448 | 0.0297688321927200 | 0.5123904188816184 |
| 0.9318226857878465 | 0.7901898405503225 | 0.4854562994762915 |
| 0.4746173002558810 | 0.3084756628469065 | 0.5031115723361225 |
| 0.1461903455307023 | 0.6448345010785066 | 0.3472795002069173 |
| 0.7996953647693201 | 0.9752828392671942 | 0.6778108462479291 |
| 0.5886465466305917 | 0.1180711336485582 | 0.3231904169544956 |
| 0.2607758304449696 | 0.4541223823741860 | 0.6651826933568386 |
| 0.7101166786241342 | 0.0395763749592145 | 0.4865797038037252 |
| 0.1917363342914310 | 0.0642841789289607 | 0.5018257886979718 |
| 0.8544482504175521 | 0.3986150531635586 | 0.3472975793218242 |
| 0.5064714985450615 | 0.7405952935076230 | 0.7058374430600628 |
| 0.3818726978350541 | 0.3696449505233541 | 0.3251068776408969 |
| 0.0521825715898410 | 0.7071604641598213 | 0.6577902144577361 |
| 0.4613318490879316 | 0.5712506922151350 | 0.4898891534921077 |
| 0.4366745274262500 | 0.0239211773480315 | 0.5024364644183680 |
| 0.1012328549763784 | 0.3543651803265013 | 0.3475062933860451 |
| 0.7750398390675083 | 0.7026648546831719 | 0.6775204987798578 |
| 0.1315072678379050 | 0.9114184318856718 | 0.3233103817344634 |
| 0.7934657690695218 | 0.2368923856293974 | 0.6652922873538630 |
| 0.6982977292910457 | 0.2969185200980633 | 0.4983411725469905 |
| 0.6987277651319949 | 0.7988411783684302 | 0.4995577310649072 |
| 0.2006370302417138 | 0.2988730185663742 | 0.4998938872811677 |
| 0.2036360805672967 | 0.8009647237400193 | 0.4977623391771615 |
| 0.8705951894848473 | 0.1274299941611678 | 0.3345836189992218 |
| 0.5291034133102911 | 0.4640000896611705 | 0.6667872108480345 |
| 0.3735621867701586 | 0.6421547658954186 | 0.3367132404104494 |
| 0.0298027150177246 | 0.9589046859606214 | 0.6640613122436020 |
| 0.3672332793313670 | 0.1328585679937393 | 0.3120339238626075 |
| 0.0327680692965495 | 0.4649394360832440 | 0.6846539879193055 |
| 0.8577391644058090 | 0.6297623314982663 | 0.3338583781492429 |
| 0.5414029837206683 | 0.9719290111377190 | 0.6670280463670805 |
| 0.5756461640637995 | 0.6803055566326802 | 0.7663712970821915 |
| 0.5923749656008152 | 0.6872940206186470 | 0.8325018860650882 |
| 0.6146436080089039 | 0.6223777206958635 | 0.7224999207018695 |
| 0.9056677428717544 | 0.6667391137084914 | 0.7740323371035617 |

**The perfect Pt<sub>7</sub>-O<sub>v6</sub>-[CO+OH]\* surface**

O In Pt In C O H

1.00000000000000

14.444300000000001 0.000000000000000 0.000000000000000

-7.2221499999999965 12.5091307398835685 0.000000000000000

0.0000000000000011 0.0000000000000019 17.985499999999983

O In Pt In C O H

71 27 1 20 1 2 1

Direct

0.8432656533264291 0.6133233574550874 0.4546268340540557

0.5158258427420938 0.9517663936611738 0.2881053050252152

0.1736774171675044 0.2818089471259713 0.6204253124509953

0.7934201355231304 0.9604566503521537 0.2972547043539170

0.4694158556177130 0.2894661809127499 0.6663462142732598

0.1339287234906150 0.6249045441251027 0.4682251894165182

0.3022844908776126 0.7318633076165302 0.2993874526260766

0.9765558483597986 0.0695117056800966 0.6356433434678327

0.6396887715154602 0.4035436890304248 0.4602457313359522

0.5289018236584280 0.2083300962404231 0.2675019958040273

0.1863704609604578 0.5414508491252062 0.6107828430388232

0.8556921490187785 0.8811770581808014 0.4414972036002442

0.8870107668150173 0.1277472293271064 0.4556249783812384

0.5474750078022304 0.4622876063292946 0.2867817144034442

0.2189751510999329 0.7922486274676004 0.6208440662601569

0.5399093278980753 0.7312424143701937 0.2977927547416352

0.2061687997489743 0.0784782556682163 0.6550452482632443

0.8738538571992416 0.4067854108322452 0.4673571683476381

0.7695390679875024 0.4689159700270153 0.2976306205504720

0.4309339347099854 0.8052327087512698 0.6410595252770691

0.0951547331727203 0.1350622729263075 0.4656432353320626

0.2892230791912473 0.2186889252853083 0.2673062808913628

0.9605425140554810 0.5424151831506837 0.6078513962412715

0.6184998473169395 0.8756150029162079 0.4406515791343650

0.3696867258551448 0.6569362490182507 0.4557360965139371

0.0371900716619311 0.9840080261920829 0.2892833815093706

0.7085502049887595 0.3271172241546960 0.6174380445845367

0.7693010064878530 0.7068764212687279 0.2964159383958958

0.4218198956266238 0.0291457720700169 0.6538042572198459

0.0930430789569671 0.3670795224890119 0.4682603309018330

0.0313683370052280 0.1988017740668227 0.2990190325823823

0.6981761657284382 0.5229684154804336 0.6275030852364517

0.3667323419244803 0.8573120884928205 0.4689821728656154

0.2808497184723848 0.9699564550317485 0.2685112446619209

0.9564982200150228 0.3146722484113110 0.6092056930520794

|                    |                    |                    |
|--------------------|--------------------|--------------------|
| 0.6291093162988828 | 0.6405015361177185 | 0.4395660820118279 |
| 0.2277484178117298 | 0.3168686912210814 | 0.3783654181390115 |
| 0.8870825139329153 | 0.6428384827582319 | 0.7109414473689363 |
| 0.5581520399186447 | 0.9864814178870178 | 0.5445701137491088 |
| 0.2671270216831134 | 0.9746834761195526 | 0.5302355665916280 |
| 0.9288165123042320 | 0.3055794065942762 | 0.3459968088458896 |
| 0.7587905556701968 | 0.1940389211556642 | 0.5327393617004466 |
| 0.4241183936839436 | 0.5283088618017793 | 0.3644609582004381 |
| 0.0974050775146232 | 0.8669325358630690 | 0.6984319516894336 |
| 0.5451170385153261 | 0.7146439794850246 | 0.5550585409484878 |
| 0.2166341566598419 | 0.0600891717595594 | 0.3874589657154595 |
| 0.8704421723844892 | 0.3880475810832510 | 0.7274814604446770 |
| 0.1843403663201159 | 0.8098622223682749 | 0.3786827457968125 |
| 0.8527481470983054 | 0.1366388822706919 | 0.7083683605851120 |
| 0.5133167005729524 | 0.4668919512565454 | 0.5435065113397984 |
| 0.5228635017988679 | 0.1925841074268095 | 0.5301644924359873 |
| 0.1945616530768031 | 0.5214680849122225 | 0.3436182723332027 |
| 0.8591630966553711 | 0.8657681650598712 | 0.7019212616107495 |
| 0.3059398674776284 | 0.4641131470334814 | 0.5342346296640857 |
| 0.9719559305643863 | 0.7936479942388683 | 0.3637125637804745 |
| 0.6332654447932795 | 0.1365549261987023 | 0.7010592007934245 |
| 0.7840256002008729 | 0.7258654526998934 | 0.5590786946377321 |
| 0.4404907006184078 | 0.0546223401537137 | 0.3877876090621406 |
| 0.1116047885916863 | 0.3814650423065664 | 0.7281246284993502 |
| 0.6906813035167787 | 0.2717292727757435 | 0.3764953883219633 |
| 0.3511843297256084 | 0.6188577300802043 | 0.7210228910177751 |
| 0.0292339084865472 | 0.9415543067000326 | 0.5429692232792296 |
| 0.3096940652473558 | 0.2326188489974098 | 0.5311104831445321 |
| 0.9789682424833982 | 0.5719398173066038 | 0.3461382570088162 |
| 0.6319378983460746 | 0.9075499577449340 | 0.7079787703186128 |
| 0.0362304705631058 | 0.7402185597942254 | 0.5335350780290001 |
| 0.7068351898952220 | 0.0771110950946487 | 0.3628364556333828 |
| 0.3729794700753407 | 0.4061845948408109 | 0.6964199318640600 |
| 0.7736681795587137 | 0.9563840039697890 | 0.5587263025997550 |
| 0.4429560508191109 | 0.2826740235389029 | 0.3840439570794406 |
| 0.1126445785676921 | 0.6265574819770311 | 0.7291246169146547 |
| 0.1405949517048702 | 0.1454626418707308 | 0.3313466139607056 |
| 0.8132589834864256 | 0.4791383209068937 | 0.6704476299388221 |
| 0.5996439435687830 | 0.6225012556416678 | 0.3205378738721307 |
| 0.2544780258310290 | 0.9557379606200174 | 0.6520421285821234 |
| 0.9253129929857626 | 0.2900436837674454 | 0.4931348573894058 |
| 0.4728002395250874 | 0.8070020522309892 | 0.5164037735090150 |
| 0.3551435924381094 | 0.8940197598898108 | 0.3315105224334685 |
| 0.0194474810182150 | 0.2304856723776231 | 0.6733269636827818 |

|                    |                    |                    |
|--------------------|--------------------|--------------------|
| 0.8764937297494589 | 0.8748536176445270 | 0.3211322012169647 |
| 0.5460192083803529 | 0.2021528670448320 | 0.6519660790798361 |
| 0.2106893404264148 | 0.5347399473160580 | 0.4945692570586379 |
| 0.6900177290899581 | 0.5572096504171662 | 0.5091825945553154 |
| 0.6061604471703730 | 0.3592631813751772 | 0.3290762036616281 |
| 0.2627717903619418 | 0.6878335641395432 | 0.6757569296698728 |
| 0.6249751877589929 | 0.9004990932799130 | 0.3210296431951586 |
| 0.2995601101938349 | 0.2459249886527640 | 0.6528391591014203 |
| 0.9660862063367589 | 0.5742005073693668 | 0.4922670441452168 |
| 0.9406235956701158 | 0.0292440008068205 | 0.5126048292699585 |
| 0.9307784136092482 | 0.7890075868909100 | 0.4861958945042852 |
| 0.4736069202096244 | 0.3084997963024410 | 0.4982846433564143 |
| 0.1464786041403487 | 0.6451008030574792 | 0.3466177216778269 |
| 0.7990619308503659 | 0.9748494126548448 | 0.6779071996651940 |
| 0.5881725102126421 | 0.1176104681710450 | 0.3236527862948732 |
| 0.2629603551235983 | 0.4577284618369633 | 0.6657757661824197 |
| 0.7104200382224409 | 0.0400196958048555 | 0.4861682625270836 |
| 0.1909349436302332 | 0.0650038341812473 | 0.5034580108897286 |
| 0.8549593193604084 | 0.3989218635379063 | 0.3458913876814947 |
| 0.4991355957213403 | 0.7543793744891250 | 0.7204011058261749 |
| 0.3809317809677733 | 0.3695250651897183 | 0.3225407259273298 |
| 0.0451226249669669 | 0.7047616557436968 | 0.6641776223512379 |
| 0.4612317426282698 | 0.5707680774362999 | 0.4885142122112294 |
| 0.4351937968485739 | 0.0240708974648707 | 0.5038107804238487 |
| 0.1013404084290885 | 0.3547417126520391 | 0.3465842839615826 |
| 0.7851817376938072 | 0.6981875540958827 | 0.6769830612627276 |
| 0.1312848488783657 | 0.9116381570130612 | 0.3248833324041103 |
| 0.7946320846832404 | 0.2392460137952233 | 0.6647807766374729 |
| 0.6990343122759175 | 0.2989372436216449 | 0.4973056265912407 |
| 0.6982109898142608 | 0.7977882955005325 | 0.5008805280804005 |
| 0.2007384027484183 | 0.2998863437010723 | 0.4994772956285896 |
| 0.2015945819389423 | 0.7996590877373133 | 0.4992850669062139 |
| 0.8706484492051229 | 0.1272141757254661 | 0.3343132593141240 |
| 0.5334237953289120 | 0.4611248490933231 | 0.6639620660117280 |
| 0.3731627527707711 | 0.6418732241037390 | 0.3354396041426081 |
| 0.0282194715517057 | 0.9582749886211809 | 0.6642777465794513 |
| 0.3664004835166083 | 0.1325716511829527 | 0.3112985087316004 |
| 0.0328264632378455 | 0.4649874873091250 | 0.6841290569511492 |
| 0.8585563440063813 | 0.6296701028658509 | 0.3334897574868770 |
| 0.5420041179587942 | 0.9772701121959876 | 0.6648461391004609 |
| 0.5471354513013371 | 0.7216817823090654 | 0.8044868487482739 |
| 0.5744612433376166 | 0.7054017110917526 | 0.8613596795321014 |
| 0.6293915498792675 | 0.6046865375730887 | 0.7325034163174872 |
| 0.6261362225151871 | 0.5999055695770500 | 0.7861426681158058 |

### The perfect Pt<sub>7</sub>-O<sub>V6</sub>-[TS-CO-O]\* surface

| O                   | In | Pt | In | C                   | O                   |
|---------------------|----|----|----|---------------------|---------------------|
| 1.000000000000000   |    |    |    |                     |                     |
| 14.4443000000000001 |    |    |    | 0.000000000000000   | 0.000000000000000   |
| -7.2221500000000001 |    |    |    | 12.5091307398836005 | 0.000000000000000   |
| 0.00000000000000011 |    |    |    | 0.00000000000000019 | 17.9855000000000018 |

| O  | In | Pt | In | C | O |
|----|----|----|----|---|---|
| 71 | 27 | 1  | 20 | 1 | 2 |

#### Direct

|                    |                    |                    |
|--------------------|--------------------|--------------------|
| 0.8418772970123052 | 0.6125950609113229 | 0.4569261243221125 |
| 0.5157168898345188 | 0.9518924104399994 | 0.2889309028393499 |
| 0.1713329976887911 | 0.2789219911799654 | 0.6187701418725998 |
| 0.7932529493838917 | 0.9604614132737099 | 0.2977730781656652 |
| 0.4714588073870705 | 0.2941223074589825 | 0.6555134462716012 |
| 0.1325284420600582 | 0.6249740960766585 | 0.4688097731756056 |
| 0.3010756754924921 | 0.7308094055051473 | 0.2998069967658499 |
| 0.9784697424695690 | 0.0705253853066640 | 0.6348729056361944 |
| 0.6402603282072229 | 0.4052919766949606 | 0.4652584077520012 |
| 0.5290955266892524 | 0.2093161911229480 | 0.2695252262708567 |
| 0.1820783722113827 | 0.5384231728177109 | 0.6092883257894267 |
| 0.8557079326439770 | 0.8811291797169589 | 0.4422506910422108 |
| 0.8872495743846903 | 0.1284794717662159 | 0.4555076551638551 |
| 0.5477460769063582 | 0.4629678644351247 | 0.2900116816251394 |
| 0.2207549616361607 | 0.7909655542216316 | 0.6202345609573929 |
| 0.5393293527730575 | 0.7313532028140197 | 0.2988294238316358 |
| 0.2068092899670920 | 0.0769806575279892 | 0.6560258044279429 |
| 0.8747873282232039 | 0.4069952347619973 | 0.4684839016348348 |
| 0.7680922634785373 | 0.4685545233048567 | 0.2997703964564425 |
| 0.4323581061526122 | 0.8075187940687829 | 0.6450843572604396 |
| 0.0947286166743273 | 0.1336119499162305 | 0.4636720079692489 |
| 0.2905708030411588 | 0.2191744087838015 | 0.2693379702796634 |
| 0.9594000539620460 | 0.5428625074673701 | 0.6106324670260523 |
| 0.6185660549418215 | 0.8751594620099195 | 0.4411772155102962 |
| 0.3699233354703209 | 0.6576337245451269 | 0.4567822268843363 |
| 0.0366962949112301 | 0.9833326339690555 | 0.2895102759446538 |
| 0.7101478602439081 | 0.3274831078183733 | 0.6199214431442236 |
| 0.7678903070791566 | 0.7063533570761799 | 0.2991204373656812 |
| 0.4235999489667087 | 0.0293800899563031 | 0.6544735250040665 |
| 0.0911352861381673 | 0.3647631408514803 | 0.4684128096959816 |
| 0.0310829361809076 | 0.1983966265142321 | 0.2988028460332030 |
| 0.6940978259617264 | 0.5212208370623440 | 0.6350688747120121 |
| 0.3660431793671732 | 0.8585062554578400 | 0.4679151012857977 |
| 0.2808803421401327 | 0.9701031747703058 | 0.2689133236047592 |
| 0.9554282471357355 | 0.3146809107751867 | 0.6106206056083731 |

|                    |                    |                    |
|--------------------|--------------------|--------------------|
| 0.6265916234122700 | 0.6433833656099606 | 0.4435699718327384 |
| 0.2269813409089240 | 0.3171781390945115 | 0.3780862654559732 |
| 0.8858049731579193 | 0.6468799741741144 | 0.7106326949517636 |
| 0.5579868066748923 | 0.9859245725622613 | 0.5448043586064799 |
| 0.2675634907871458 | 0.9745006125826077 | 0.5309547693173254 |
| 0.9280662468247172 | 0.3055622933780370 | 0.3443328508711497 |
| 0.7585287728016139 | 0.1936045486549940 | 0.5340061611764333 |
| 0.4236776270682073 | 0.5289021915593346 | 0.3663407063839881 |
| 0.1003787962660223 | 0.8668480082727449 | 0.6995183644321636 |
| 0.5414935031041540 | 0.7204143964967512 | 0.5604413248256759 |
| 0.2164773961884197 | 0.0589729684473538 | 0.3875865814902716 |
| 0.8711344137013802 | 0.3896286490609670 | 0.7299246728319265 |
| 0.1838111688533476 | 0.8096854637848256 | 0.3789881992098699 |
| 0.8530972110754582 | 0.1367878430660971 | 0.7097719473855849 |
| 0.5123067462240057 | 0.4705967471616689 | 0.5447801551361231 |
| 0.5249072711982987 | 0.1921004101988756 | 0.5308598543177361 |
| 0.1939739629561587 | 0.5213540169847479 | 0.3479800483658932 |
| 0.8636643144309979 | 0.8686268807359898 | 0.7028313235611301 |
| 0.3037259173108369 | 0.4627781272898171 | 0.5336708581203818 |
| 0.9715299610007355 | 0.7931400338184159 | 0.3648368842873182 |
| 0.6334762247203907 | 0.1353598305472552 | 0.7022103465104411 |
| 0.7837398169492652 | 0.7261926538450256 | 0.5600893242916141 |
| 0.4401841248760018 | 0.0544842611422887 | 0.3882692226340075 |
| 0.1113696781072171 | 0.3807913860991795 | 0.7279286622530099 |
| 0.6903491548006631 | 0.2722831813357851 | 0.3788096081359659 |
| 0.3607976691470279 | 0.6123349189525383 | 0.7032820691786272 |
| 0.0300924583888383 | 0.9416876911392377 | 0.5433432278601668 |
| 0.3076164112050121 | 0.2313207091143280 | 0.5306263079914191 |
| 0.9780250157937680 | 0.5715398638494633 | 0.3457279034040976 |
| 0.6369862146477085 | 0.9002883573447645 | 0.6992871912226143 |
| 0.0360085796801380 | 0.7403089424703388 | 0.5348893388023467 |
| 0.7065317951818718 | 0.0771229537387686 | 0.3634644753941915 |
| 0.3664296181889669 | 0.3989962741767275 | 0.6996958509578824 |
| 0.7757495941258572 | 0.9578857580446679 | 0.5580747695850961 |
| 0.4438295384514024 | 0.2834191236943684 | 0.3883497803530552 |
| 0.1174336927313074 | 0.6275328557861385 | 0.7294449573634767 |
| 0.1403736588245707 | 0.1450076654339884 | 0.3313724770130610 |
| 0.8122749013300884 | 0.4809684260018535 | 0.6744951514993851 |
| 0.5988800204496594 | 0.6229766441781656 | 0.3236800581317885 |
| 0.2563170722410315 | 0.9545638436395422 | 0.6526868407163523 |
| 0.9246704834714713 | 0.2894254543970614 | 0.4947271152539113 |
| 0.4721248201091849 | 0.8102986920218856 | 0.5136611556717811 |
| 0.3546223044665652 | 0.8938965947558004 | 0.3313763114245268 |
| 0.0188625655394919 | 0.2299784830446653 | 0.6737924569814377 |

|                    |                    |                    |
|--------------------|--------------------|--------------------|
| 0.8761870377597626 | 0.8745599508701479 | 0.3223401539508999 |
| 0.5464103491150574 | 0.2029549574496720 | 0.6525851923506655 |
| 0.2084023514118555 | 0.5332491131568500 | 0.4928402435605914 |
| 0.6891643749277373 | 0.5585534708128588 | 0.5141301402644705 |
| 0.6054388539673833 | 0.3593519796457893 | 0.3324715005143156 |
| 0.2650749584581135 | 0.6849209940572824 | 0.6731440146476549 |
| 0.6250110964331889 | 0.9006101512575423 | 0.3212546342791971 |
| 0.2991115772154375 | 0.2435260556979653 | 0.6525942560110835 |
| 0.9650458575046968 | 0.5740163402260720 | 0.4948765416853733 |
| 0.9415731288964374 | 0.0294838114611588 | 0.5118133883958020 |
| 0.9299427180305598 | 0.7884807101387296 | 0.4875694441730476 |
| 0.4745580654242045 | 0.3099304043320495 | 0.5041614381473193 |
| 0.1451176885729257 | 0.6451807397401202 | 0.3472466008562040 |
| 0.8054329820869983 | 0.9771873711908251 | 0.6771646639835387 |
| 0.5882027166062367 | 0.1181938937787002 | 0.3248618552431730 |
| 0.2584799862781791 | 0.4504378549763116 | 0.6615294209164816 |
| 0.7111748153721810 | 0.0406233553677930 | 0.4864086434970241 |
| 0.1909320161679608 | 0.0640926036527548 | 0.5032384248635224 |
| 0.8545042495923043 | 0.3989274905320703 | 0.3468232361700120 |
| 0.5134141251202297 | 0.7401734756437508 | 0.7003696253342507 |
| 0.3817034210734748 | 0.3694824846076159 | 0.3255866499290495 |
| 0.0453077719373615 | 0.7048091947114571 | 0.6659950588434614 |
| 0.4599413603090094 | 0.5725283615411844 | 0.4907947371148537 |
| 0.4353463881211321 | 0.0251843713790363 | 0.5043221648785905 |
| 0.0998789448633310 | 0.3539285277867044 | 0.3467280207727815 |
| 0.7769494704359335 | 0.6988082165909757 | 0.6800735131297158 |
| 0.1307337140519224 | 0.9110280569165273 | 0.3248705535285641 |
| 0.7952441400648244 | 0.2405852726972803 | 0.6669437600683105 |
| 0.6998425936867978 | 0.2998919878457318 | 0.4993974626373380 |
| 0.6982860230155253 | 0.7990597995914868 | 0.5035189708183788 |
| 0.1996581654606146 | 0.2980837461821982 | 0.4984015557216138 |
| 0.2006204416865429 | 0.7995672646668373 | 0.4996342767945645 |
| 0.8704508309877059 | 0.1274974072881857 | 0.3342276510971289 |
| 0.5286596211030443 | 0.4712408827420635 | 0.6661916985721683 |
| 0.3727241756950354 | 0.6417644674996635 | 0.3361302731038766 |
| 0.0299011061028367 | 0.9574837838736349 | 0.6646854685057253 |
| 0.3667262203507685 | 0.1327893112780557 | 0.3134710619726214 |
| 0.0326513854972121 | 0.4651513492875424 | 0.6848153974066095 |
| 0.8574773299556557 | 0.6290666922427329 | 0.3355859612370687 |
| 0.5453852136462554 | 0.9769163874977153 | 0.6653228378992211 |
| 0.5441758668487972 | 0.7176027700295698 | 0.7958382294338017 |
| 0.5594067737626366 | 0.7084219694829966 | 0.8577468251437683 |
| 0.6112803002180580 | 0.6323196505007274 | 0.7077950152770361 |

### The perfect Pt<sub>7</sub>-CO\* \_P surface

O In Pt In O C

1.0000000000000000  
14.4443000000000001 0.0000000000000000 0.0000000000000000  
-7.2221499999999965 12.5091307398835685 0.0000000000000000  
0.00000000000000011 0.00000000000000019 17.985499999999983

O In Pt In O C  
71 27 1 20 2 1

Direct

0.8407251048125473 0.6134546582819006 0.4586731581123585  
0.5159039972854985 0.9522710468945849 0.2904255730004789  
0.1701250644375648 0.2765756064840109 0.6185425135945377  
0.7925318248983885 0.9606514450681778 0.2989990731623327  
0.4713917594164043 0.2956383964733323 0.6510408156971662  
0.1329120561257003 0.6257705366917903 0.4699417582297448  
0.3004064471532830 0.7306790546596225 0.3008347128070928  
0.9801307288181889 0.0708925144112422 0.6358105165358436  
0.6401501359457966 0.4070218602792477 0.4688912634877175  
0.5295148808246649 0.2098557896327478 0.2711022629482744  
0.1791773910158737 0.5356331962464075 0.6085881627383033  
0.8572897362875960 0.8822075453895096 0.4425230927112930  
0.8872909160633710 0.1292721595821842 0.4567454644707037  
0.5481275438949936 0.4639365020846407 0.2926159667511234  
0.2242220534463256 0.7909338424687806 0.6199033653491951  
0.5388162931840341 0.7319512586944649 0.2997175046471321  
0.2078104904252930 0.0758160869195095 0.6598221354243395  
0.8747661390365034 0.4070916596223087 0.4699733049168671  
0.7674458965895630 0.4683958088471474 0.3010959879016046  
0.4362845298794621 0.8081575093939886 0.6540578361349734  
0.0943835953082732 0.1322801291509473 0.4624942025297794  
0.2913728044200973 0.2193271589773692 0.2696482573196267  
0.9580657934478668 0.5432542839952894 0.6122502500246215  
0.6174447659442599 0.8725377894353210 0.4438412844840007  
0.3738194363006994 0.6588528071684132 0.4593762538163969  
0.0365612050887090 0.9829388911032817 0.2886139675719036  
0.7097947741420830 0.3305978327990656 0.6220251868403993  
0.7665572956918127 0.7065109596004147 0.3016393143416154  
0.4254612066223815 0.0293744901681840 0.6545047925998113  
0.0898817606778001 0.3628565420285903 0.4688090060730440  
0.0303957005868388 0.1981501308367235 0.2988767173762463  
0.6894125751516684 0.5267428689501226 0.6423220107580009  
0.3659228884741364 0.8592431741828873 0.4680800965565547  
0.2812703938099119 0.9701876041499955 0.2688864395036680  
0.9555272863315537 0.3151387598704042 0.6121947569576023



|                    |                    |                    |
|--------------------|--------------------|--------------------|
| 0.6225557764592421 | 0.6470415144312804 | 0.4472180452866988 |
| 0.2265013452499096 | 0.3169611957756193 | 0.3776502252428380 |
| 0.8847667437257072 | 0.6484773344092557 | 0.7109316337606283 |
| 0.5578633028153789 | 0.9849325003308754 | 0.5465710524077075 |
| 0.2676722501487307 | 0.9745276102176452 | 0.5321902954914833 |
| 0.9273284684901275 | 0.3053429019893233 | 0.3446818084021628 |
| 0.7582626228295727 | 0.1942150245227440 | 0.5369718835280920 |
| 0.4226945516941930 | 0.5288699067914584 | 0.3668062211903222 |
| 0.1020174546367463 | 0.8654411299664868 | 0.7003247861529281 |
| 0.5399484546896259 | 0.7255926750527119 | 0.5708728387657571 |
| 0.2162008340646897 | 0.0585050961612691 | 0.3869202486952852 |
| 0.8711363301377619 | 0.3909205151781928 | 0.7316057835389820 |
| 0.1836384363808282 | 0.8102089401562691 | 0.3796234728572311 |
| 0.8535695361962091 | 0.1373997179548732 | 0.7112888108887027 |
| 0.5112324754798289 | 0.4725337363211927 | 0.5454333861201327 |
| 0.5265770324586182 | 0.1921047336691308 | 0.5318283367781081 |
| 0.1943966633315748 | 0.5219848864010715 | 0.3518927659917090 |
| 0.8657961636773471 | 0.8694624697636749 | 0.7045196615121554 |
| 0.3012263535147190 | 0.4603117337187254 | 0.5326263772507354 |
| 0.9714939162739131 | 0.7931909101306357 | 0.3651225183668330 |
| 0.6345619511802053 | 0.1368753882310222 | 0.7039526999982960 |
| 0.7833707566968848 | 0.7274469850934800 | 0.5606611164034149 |
| 0.4394911985915204 | 0.0544837194772345 | 0.3894087693287032 |
| 0.1118933515290259 | 0.3808392760166732 | 0.7285887053663074 |
| 0.6899518921528541 | 0.2728003823328938 | 0.3810334853592371 |
| 0.3666262391854240 | 0.6078827261531161 | 0.6883164437917345 |
| 0.0310130130747590 | 0.9420966116571806 | 0.5443708684641915 |
| 0.3060087419791155 | 0.2297001342384674 | 0.5309929965281702 |
| 0.9771306624689483 | 0.5715898483830103 | 0.3483860434552311 |
| 0.6423342646102976 | 0.8984213880350768 | 0.6945779012340301 |
| 0.0362248198608333 | 0.7404449475893677 | 0.5362279980542165 |
| 0.7053423565376187 | 0.0760639372847994 | 0.3665977598582721 |
| 0.3642201263955711 | 0.3969611322821557 | 0.7014930756191157 |
| 0.7776926516675228 | 0.9589124328740014 | 0.5584695009921903 |
| 0.4440610072202409 | 0.2838282046824727 | 0.3904440751104307 |
| 0.1202058620372667 | 0.6276994195542899 | 0.7294905159407641 |
| 0.1400722372745714 | 0.1447661526543302 | 0.3302528669431096 |
| 0.8109674658224697 | 0.4826133810419449 | 0.6770722699339349 |
| 0.5981417168486085 | 0.6239674857855936 | 0.3249638696093640 |
| 0.2579753413651341 | 0.9539800304641312 | 0.6539759023035056 |
| 0.9243660690228710 | 0.2895707766086097 | 0.4962798215958571 |
| 0.4718390366313032 | 0.8129427941411919 | 0.5131840377088031 |
| 0.3544123484025617 | 0.8943947990965020 | 0.3316181906194804 |
| 0.0187029796782497 | 0.2298056866354724 | 0.6751433079494253 |

|                    |                    |                    |
|--------------------|--------------------|--------------------|
| 0.8764734787249346 | 0.8752030456233167 | 0.3223912364649464 |
| 0.5463821298473838 | 0.2036173461088400 | 0.6534820483071841 |
| 0.2067199440755677 | 0.5318504959468440 | 0.4917974230261704 |
| 0.6881354152443900 | 0.5602167842774335 | 0.5162597945324924 |
| 0.6050997146479314 | 0.3594449771444724 | 0.3343388893934912 |
| 0.2659030536649869 | 0.6825537171598842 | 0.6709092492192260 |
| 0.6247851651690233 | 0.9008078844957419 | 0.3227044256874366 |
| 0.2984250438791821 | 0.2415054739151866 | 0.6531137656727655 |
| 0.9646926137411872 | 0.5742035353307264 | 0.4959503198776056 |
| 0.9429949827550649 | 0.0304743930926437 | 0.5121547554917441 |
| 0.9314146386399190 | 0.7893918852162962 | 0.4877425913356707 |
| 0.4742010268122894 | 0.3091815880626239 | 0.5069574989308196 |
| 0.1442790346378789 | 0.6457542328460281 | 0.3482079451943547 |
| 0.8105048640437839 | 0.9797331646599798 | 0.6776269242600096 |
| 0.5880901236865270 | 0.1185693454367025 | 0.3268251541141802 |
| 0.2546393188309844 | 0.4451552243274403 | 0.6588600876536661 |
| 0.7118883400474700 | 0.0417650035218373 | 0.4883417641819338 |
| 0.1909720124098447 | 0.0630230607296314 | 0.5022543772028554 |
| 0.8539860696392082 | 0.3987678474537983 | 0.3478875783301646 |
| 0.5213921831556935 | 0.7345163478776945 | 0.6837641165210712 |
| 0.3816645782493795 | 0.3689713393139947 | 0.3264607201157575 |
| 0.0457330225005997 | 0.7042975804487586 | 0.6669071592499642 |
| 0.4561970880976393 | 0.5689631475883598 | 0.4897139516578192 |
| 0.4354197876977468 | 0.0258856392416852 | 0.5055801166053557 |
| 0.0991405131328731 | 0.3536066928083621 | 0.3469676085998981 |
| 0.7759203383346489 | 0.7017875718914858 | 0.6803168663493219 |
| 0.1305558152511858 | 0.9106882230302663 | 0.3241297116370891 |
| 0.7959258542902402 | 0.2422440880299619 | 0.6685853182786544 |
| 0.7005352157060806 | 0.3013162377108605 | 0.5013209665926847 |
| 0.7018032499902495 | 0.8024929403080544 | 0.5038394013359393 |
| 0.1981055238214181 | 0.2957292370224718 | 0.4975862782164310 |
| 0.2003853939153868 | 0.7999862721296145 | 0.5001115810248623 |
| 0.8699643242243109 | 0.1277459990866511 | 0.3352720031906237 |
| 0.5242231974756615 | 0.4745487007379050 | 0.6661314547820159 |
| 0.3726564204603537 | 0.6425742433471049 | 0.3367895083541244 |
| 0.0323746937249012 | 0.9574854946191196 | 0.6658864922755610 |
| 0.3669144353939990 | 0.1328250520458003 | 0.3141710004083912 |
| 0.0320304824648495 | 0.4649765063372252 | 0.6857448902590055 |
| 0.8565854188001097 | 0.6289073424926076 | 0.3367706820632573 |
| 0.5491161139149132 | 0.9787374750508527 | 0.6671407683190266 |
| 0.6027064218119684 | 0.6479376825546482 | 0.6981644813394629 |
| 0.5065519167368945 | 0.7418175058760293 | 0.8510607479549808 |
| 0.5109536764065505 | 0.7397823341639596 | 0.7874603073962139 |

### The perfect Pt<sub>7</sub>-H<sub>2</sub>\*\_P surface

O In Pt In H

|                     |                     |                     |  |  |
|---------------------|---------------------|---------------------|--|--|
| 1.000000000000000   |                     |                     |  |  |
| 14.4442996979000000 | 0.0000000000000000  | 0.0000000000000000  |  |  |
| -7.2221498489000000 | 12.5091304781999995 | 0.0000000000000000  |  |  |
| 0.0000000000000000  | 0.0000000000000000  | 17.9855003356999994 |  |  |

|    |    |    |    |   |
|----|----|----|----|---|
| O  | In | Pt | In | H |
| 72 | 27 | 1  | 20 | 2 |

Direct

|                    |                    |                    |
|--------------------|--------------------|--------------------|
| 0.8413482606868008 | 0.6133044076672224 | 0.4570038970375884 |
| 0.5157580678809153 | 0.9528179226010014 | 0.2887275136538529 |
| 0.1706364687639015 | 0.2790346168261129 | 0.6187003037231246 |
| 0.7934195411327850 | 0.9615950159495359 | 0.2971811473786678 |
| 0.4712062978882336 | 0.2945316473803574 | 0.6488825629758859 |
| 0.1326263316880782 | 0.6253687136803817 | 0.4690854504887395 |
| 0.3006219631921027 | 0.7315601149962287 | 0.2994688329112389 |
| 0.9784245103408313 | 0.0706852545156580 | 0.6347031862214482 |
| 0.6405193547482583 | 0.4064111821348409 | 0.4676116704669935 |
| 0.5292435643238994 | 0.2103457341024373 | 0.2702219406040616 |
| 0.1828568049448499 | 0.5388059587459721 | 0.6098290820481495 |
| 0.8584272204186663 | 0.8832767522720096 | 0.4403895245903516 |
| 0.8879010099753583 | 0.1305826680187924 | 0.4550140962975074 |
| 0.5479203331869265 | 0.4633615408350659 | 0.2905174134287530 |
| 0.2213538374487271 | 0.7903392208888955 | 0.6200960146621277 |
| 0.5390735026655059 | 0.7320832372644432 | 0.2974582625367920 |
| 0.2067653166073871 | 0.0761971326807122 | 0.6566013770961419 |
| 0.8750384308643674 | 0.4073116006818047 | 0.4686867161815215 |
| 0.7675576925713087 | 0.468862224915882  | 0.3002424939177359 |
| 0.4327163424909982 | 0.8018529624232150 | 0.6441488889805971 |
| 0.0948771484863101 | 0.1341312858201325 | 0.4628048718694622 |
| 0.2910925804150614 | 0.2194998921184180 | 0.2695480747681053 |
| 0.9577193070885361 | 0.5432122818438627 | 0.6111383262855573 |
| 0.6181073372423648 | 0.8745510394788654 | 0.4401528023341061 |
| 0.3724415069275983 | 0.6586256816523034 | 0.4566810868682249 |
| 0.0374225456727261 | 0.9839976047407522 | 0.2881360627108387 |
| 0.7089472165013246 | 0.3289988137688053 | 0.6209522565873673 |
| 0.7680752234394115 | 0.7072670768782851 | 0.2984555697484690 |
| 0.4238303319801514 | 0.0266004120285144 | 0.6525748073422886 |
| 0.0909933137340163 | 0.3653884703684724 | 0.4683771141662801 |
| 0.0314617760608979 | 0.1991125951179740 | 0.2985166869187799 |
| 0.6890987851341623 | 0.5256835521459561 | 0.6393565606677141 |
| 0.3650087712072208 | 0.8590300598224526 | 0.4663951702454873 |
| 0.2812469783091552 | 0.9708528494480914 | 0.2685910156737390 |
| 0.9552439004108669 | 0.3158013187165130 | 0.6113351152035349 |

|                    |                    |                    |
|--------------------|--------------------|--------------------|
| 0.6252133970993359 | 0.6453672896151443 | 0.4424810991721841 |
| 0.2271482090074974 | 0.3181305373546962 | 0.3778697719369583 |
| 0.8826261189621193 | 0.6487226432008023 | 0.7086718206262458 |
| 0.5579001606707140 | 0.9848749097619465 | 0.5441591890309811 |
| 0.2670132304724157 | 0.9743245637038582 | 0.5308078075564006 |
| 0.9283406049588536 | 0.3066617138160825 | 0.3425307797437990 |
| 0.5988388357615826 | 0.6453828981891214 | 0.6998365799377998 |
| 0.7585965485286910 | 0.1943035275907528 | 0.5349815054283804 |
| 0.4229548680317053 | 0.5294183476946185 | 0.3643010133439623 |
| 0.1002600196802454 | 0.8663686889965584 | 0.6993535136460726 |
| 0.5452662394209288 | 0.7240278453042861 | 0.5600809669418271 |
| 0.2160676232305852 | 0.0589537599263426 | 0.3870747045093385 |
| 0.8697176344779191 | 0.3907318273285715 | 0.7302793254617973 |
| 0.1831728800895021 | 0.8098634858317261 | 0.3788085226286408 |
| 0.8520416542667734 | 0.1366126436127218 | 0.7093002878852761 |
| 0.5117535744694383 | 0.4728982317470539 | 0.5435058248748909 |
| 0.5262381452127589 | 0.1913170473474687 | 0.5302535072631929 |
| 0.1944070855907941 | 0.5224868569087544 | 0.3487243278914429 |
| 0.8631129232381296 | 0.8687729855285455 | 0.7019512235234640 |
| 0.3037498221208387 | 0.4633912426892535 | 0.5333963759570104 |
| 0.9716310050670461 | 0.7935179346021658 | 0.3639564961033080 |
| 0.6325007903013424 | 0.1330377364877869 | 0.7010500085172037 |
| 0.7830664173848838 | 0.7271999567373485 | 0.5585718548163542 |
| 0.4399518429269944 | 0.0548236800143512 | 0.3883913209701885 |
| 0.1098363361657843 | 0.3804685127824975 | 0.7285161244334825 |
| 0.6903688912408522 | 0.2730871515992550 | 0.3796019232601328 |
| 0.3669012211583551 | 0.6100262412459009 | 0.7035063203799182 |
| 0.0301387004961966 | 0.9422036904259278 | 0.5429742181822975 |
| 0.3061724963629630 | 0.2310219070994882 | 0.5299160433949290 |
| 0.9776112301983713 | 0.5719141544856590 | 0.3464731361030851 |
| 0.6364477217216264 | 0.8914835148551763 | 0.6930912513125606 |
| 0.0358333575363237 | 0.7404713993692885 | 0.5348942692163647 |
| 0.7064038876333526 | 0.0776122490404346 | 0.3636756247194163 |
| 0.3649327541552903 | 0.3970076243846504 | 0.7004079592629474 |
| 0.7772640656056478 | 0.9590967321661358 | 0.5557945003675959 |
| 0.4443777654461253 | 0.2844973224417940 | 0.3899737070726001 |
| 0.1176738481571345 | 0.6276802462438631 | 0.7294877203783752 |
| 0.1404255984026501 | 0.1455255173786670 | 0.3308413093517500 |
| 0.8098565763378200 | 0.4825308873786305 | 0.6753120018228372 |
| 0.5990078635699629 | 0.6240237229797007 | 0.3216698587484830 |
| 0.2563183970553341 | 0.9536120101838512 | 0.6525457363105893 |
| 0.9249024961309277 | 0.2902425644659834 | 0.4955331704847934 |
| 0.4717273399275682 | 0.8125446695805160 | 0.5108368814036320 |
| 0.3544410847944618 | 0.8946478183860387 | 0.3310203854972840 |

|                    |                    |                    |
|--------------------|--------------------|--------------------|
| 0.0177839636152101 | 0.2296691680704802 | 0.6741249853715512 |
| 0.8770351629858205 | 0.8757245324251604 | 0.3203751510019582 |
| 0.5450854216874804 | 0.2009613698448005 | 0.6519044469313562 |
| 0.2083656583669173 | 0.5338111297421606 | 0.4930053157670416 |
| 0.6884604828595816 | 0.5601331865860039 | 0.5142429951670684 |
| 0.6052540422625261 | 0.3598184947420015 | 0.3337252025596116 |
| 0.2661398033588009 | 0.6843445409569227 | 0.6739857007363983 |
| 0.6251546798433588 | 0.9015202091443013 | 0.3199456561787553 |
| 0.2984137557398570 | 0.2423857942615117 | 0.6518158487111535 |
| 0.9646054906688141 | 0.5742652877245479 | 0.4949652490386299 |
| 0.9426813675404982 | 0.0313195920055561 | 0.5111754296616581 |
| 0.9310465605541617 | 0.7893850531316577 | 0.4866614342744763 |
| 0.4746765018288030 | 0.3094861282910280 | 0.5068228193043939 |
| 0.1446961564686954 | 0.6457500029112258 | 0.3472917110045871 |
| 0.8048867873909281 | 0.9772021770825648 | 0.6758276309596698 |
| 0.5881484192937928 | 0.1190059162491872 | 0.3252443428156713 |
| 0.2561761995692857 | 0.4486025247875469 | 0.6623458604504979 |
| 0.7117031564963908 | 0.0419490291711851 | 0.4859959794218715 |
| 0.1907362014854617 | 0.0639777927256965 | 0.5025297259216325 |
| 0.8543114932472814 | 0.3992695917360882 | 0.3467742588324689 |
| 0.5150923401314230 | 0.7277477824664774 | 0.6768220573583512 |
| 0.3818693158193587 | 0.3692842973763747 | 0.3257442077197788 |
| 0.0441646391421091 | 0.7046565412821695 | 0.6660354347853596 |
| 0.4579387027781815 | 0.5698803324274395 | 0.4866858527602118 |
| 0.4349332461478966 | 0.0250853110147922 | 0.5045781496256717 |
| 0.0999433666702789 | 0.3547415427199959 | 0.3464852117093455 |
| 0.7711206657129775 | 0.7006184478554787 | 0.6789692624599838 |
| 0.1308555663214074 | 0.9112942104042295 | 0.3239880409538655 |
| 0.7944690193039610 | 0.2413115543115379 | 0.6675711652627955 |
| 0.7003246267922774 | 0.3006708115174072 | 0.5000894802077994 |
| 0.7026805291683075 | 0.8025535166284411 | 0.4993951768555014 |
| 0.1992993376272643 | 0.2983514565016349 | 0.4980314004246187 |
| 0.2001152686998225 | 0.7996605032897663 | 0.4996113198809923 |
| 0.8706799697918136 | 0.1289515558064358 | 0.3336078788183242 |
| 0.5247334818966325 | 0.4768413122341233 | 0.6647619839773404 |
| 0.3724866309087526 | 0.6427470604246155 | 0.3347480971845429 |
| 0.0295678951145508 | 0.9569230887687202 | 0.6643955621783200 |
| 0.3669948526055709 | 0.1333062039273847 | 0.3140390262924614 |
| 0.0313091644792813 | 0.4653361522407641 | 0.6851842899066831 |
| 0.8573034923781423 | 0.6294990634135568 | 0.3353836609117078 |
| 0.5471749379372811 | 0.9729949452148979 | 0.6651182218620401 |
| 0.6164215754840910 | 0.6489065162892702 | 0.8959419999897931 |
| 0.5923400658415785 | 0.6510953704483031 | 0.8602773437074392 |

**The perfect Pt<sub>7</sub>-[TS-2H]\* surface**

| O                   | In | Pt                  | In | H                   |
|---------------------|----|---------------------|----|---------------------|
| 1.000000000000000   |    |                     |    |                     |
| 14.4442996979000000 |    | 0.0000000000000000  |    | 0.0000000000000000  |
| -7.2221498489000000 |    | 12.5091304781999995 |    | 0.0000000000000000  |
| 0.0000000000000000  |    | 0.0000000000000000  |    | 17.9855003356999994 |

| O  | In | Pt | In | H |
|----|----|----|----|---|
| 72 | 27 | 1  | 20 | 2 |

**Direct**

|                    |                    |                    |
|--------------------|--------------------|--------------------|
| 0.8410252755138586 | 0.6134611821945457 | 0.4580996774027223 |
| 0.5161180224924058 | 0.9530359767679658 | 0.2893421400521849 |
| 0.1688239419680837 | 0.2784672842431062 | 0.6177126675981029 |
| 0.7934449897175959 | 0.9617232281093692 | 0.2978916150051015 |
| 0.4684115580428048 | 0.2898198542037762 | 0.6537542927082510 |
| 0.1329968199642410 | 0.6257248861329631 | 0.4694996911823974 |
| 0.3013241687817336 | 0.7315613709935824 | 0.3005409620685068 |
| 0.9786328916547359 | 0.0712247426418985 | 0.6348924239001299 |
| 0.6402021082365982 | 0.4067570807045540 | 0.4677046699284409 |
| 0.5295785662470902 | 0.2104704483842172 | 0.2701916876095171 |
| 0.1827490166293195 | 0.5390982645725170 | 0.6098507044621116 |
| 0.8577833845625207 | 0.8830174354960921 | 0.4412218430854771 |
| 0.8879393561572763 | 0.1308226478649437 | 0.4558201728703044 |
| 0.5479926857801842 | 0.4636448874716636 | 0.2907614828716716 |
| 0.2218941232731334 | 0.7904229469966262 | 0.6204249535203550 |
| 0.5393012944593932 | 0.7319665005998557 | 0.2990396389859785 |
| 0.2058895474092713 | 0.0753412148423723 | 0.6559365152260574 |
| 0.8748081897148945 | 0.4076918428577689 | 0.4693399501356294 |
| 0.7679759246266905 | 0.4692814072599104 | 0.3005688083263493 |
| 0.4335734476728783 | 0.8047555344225066 | 0.6446762844787554 |
| 0.0947174062371299 | 0.1335551790676913 | 0.4626051088033210 |
| 0.2910422296970085 | 0.2196518783989532 | 0.2696515422272401 |
| 0.9586399098278718 | 0.5439248431002889 | 0.6116687267891309 |
| 0.6181863946730055 | 0.8746813697581564 | 0.4413018021822113 |
| 0.3727214701467791 | 0.6584624481880789 | 0.4582209363471497 |
| 0.0372749440295612 | 0.9839123035015798 | 0.2887627637707308 |
| 0.7088544123836565 | 0.3300670219586398 | 0.6216113307042028 |
| 0.7675282306538850 | 0.7071918485615902 | 0.3000184469166937 |
| 0.4241244550575630 | 0.0271363859773920 | 0.6537189680577973 |
| 0.0907496841818655 | 0.3655232070122422 | 0.4684940515750366 |
| 0.0312466020889327 | 0.1991577447338719 | 0.2989720458895160 |
| 0.6911056005960513 | 0.5282030262596366 | 0.6402655231285900 |
| 0.3655955390516109 | 0.8594831269573545 | 0.4667004819064314 |
| 0.2814343022967779 | 0.9707337826073172 | 0.2689440710430242 |
| 0.9553220470834527 | 0.3166472582748020 | 0.6117392466491064 |

|                    |                    |                    |
|--------------------|--------------------|--------------------|
| 0.6247715296194976 | 0.6442093453046098 | 0.4446863371280138 |
| 0.2269945393457173 | 0.3180254591869365 | 0.3779010002109882 |
| 0.8847780081389343 | 0.6497110491220023 | 0.7097142098291788 |
| 0.5580884482025315 | 0.9858537231052922 | 0.5445755373490792 |
| 0.2675472507611578 | 0.9745298191561169 | 0.5312529578964547 |
| 0.9282402979254526 | 0.3068159202508121 | 0.3432328003808843 |
| 0.6040027426596171 | 0.6561729738201330 | 0.7048092625598521 |
| 0.7585017937153439 | 0.1949011870652657 | 0.5355840207866888 |
| 0.4234199067349403 | 0.5291358434098572 | 0.3663610934883626 |
| 0.1010192665873407 | 0.8667187327959458 | 0.6998698307707096 |
| 0.5449400183383016 | 0.7233341429154958 | 0.5617231632607225 |
| 0.2165425762218543 | 0.0591325360452813 | 0.3873151145870089 |
| 0.8706499515597373 | 0.3917578359509798 | 0.7308539916049137 |
| 0.1834766636559889 | 0.8101531112244658 | 0.3792022390696577 |
| 0.8530994909663340 | 0.1380442053855472 | 0.7101742285594151 |
| 0.5118548189784538 | 0.4710260803115458 | 0.5476710121075005 |
| 0.5256202270940925 | 0.1921893288538619 | 0.5311970090784324 |
| 0.1946591426142642 | 0.5225587251434733 | 0.3492639500378000 |
| 0.8650832567154709 | 0.8707053971136444 | 0.7031052824903323 |
| 0.3031511928864373 | 0.4625628987748514 | 0.5335400835649917 |
| 0.9716095211356529 | 0.7936668669745200 | 0.3646779778840861 |
| 0.6337152244397045 | 0.1344039176801484 | 0.7021044980201210 |
| 0.7835018051626748 | 0.7280971156949377 | 0.5599113729602930 |
| 0.4403082602945173 | 0.0554851049079657 | 0.3886205610690264 |
| 0.1111586117580280 | 0.3813926865634769 | 0.7285219690175363 |
| 0.6902723836558048 | 0.2734215824119636 | 0.3800644750621556 |
| 0.3682571978716711 | 0.6119591920435158 | 0.7022923780039532 |
| 0.0300713242150542 | 0.9422580488572311 | 0.5433078344388168 |
| 0.3063526959463042 | 0.2309052702320674 | 0.5302576769438694 |
| 0.9777693436704998 | 0.5722444695653048 | 0.3476504241509864 |
| 0.6379023727309545 | 0.8954655375453452 | 0.6952191231523749 |
| 0.0363597562440015 | 0.7410050203901932 | 0.5352383139016740 |
| 0.7064921974604060 | 0.0778060650253066 | 0.3644589429031962 |
| 0.3621074874526278 | 0.3945135272677862 | 0.6993459439166525 |
| 0.7770487738611314 | 0.9593176853406176 | 0.5568670065595004 |
| 0.4443540774590894 | 0.2844886141671008 | 0.3894532177222093 |
| 0.1189883658140980 | 0.6282985779529424 | 0.7301364443848820 |
| 0.1404001220085923 | 0.1455180312185765 | 0.3311446755035691 |
| 0.8110620435662459 | 0.4835472914008553 | 0.6759245736417028 |
| 0.5987132757492621 | 0.6236503175448943 | 0.3236393362936242 |
| 0.2567932110144087 | 0.9535922324697234 | 0.6529364178571545 |
| 0.9249033447194118 | 0.2907313903872081 | 0.4960844232470762 |
| 0.4718063293825511 | 0.8125981475255429 | 0.5120285751897568 |
| 0.3547512006508301 | 0.8947690307546050 | 0.3316773615392948 |

|                    |                    |                    |
|--------------------|--------------------|--------------------|
| 0.0182431511982751 | 0.2306387460945942 | 0.6742843461370471 |
| 0.8769175006210891 | 0.8757612906926763 | 0.3213098482802831 |
| 0.5456009103043999 | 0.2007173829442016 | 0.6528895584522284 |
| 0.2083889735939051 | 0.5338006753912209 | 0.4933143878270425 |
| 0.6881007952120435 | 0.5597323138930547 | 0.5162991815876514 |
| 0.6055052733222596 | 0.3600698084475972 | 0.3334355094318878 |
| 0.2672001699457824 | 0.6845698603550912 | 0.6742671290834928 |
| 0.6252252735655446 | 0.9015609494098418 | 0.3209537473947522 |
| 0.2953049997619528 | 0.2410517457032556 | 0.6519172588301848 |
| 0.9649936041438373 | 0.5748033464383265 | 0.4954946565028279 |
| 0.9426356198342513 | 0.0313730817821968 | 0.5118294361069649 |
| 0.9309020579364660 | 0.7893985721201079 | 0.4873699742732544 |
| 0.4741399660106501 | 0.3096882749623449 | 0.5057859261747467 |
| 0.1449923064557007 | 0.6459808786467813 | 0.3478360214890834 |
| 0.8061851268582718 | 0.9787549739228154 | 0.6767007243926768 |
| 0.5884402225523603 | 0.1192902282000668 | 0.3255920525429714 |
| 0.2575281399776952 | 0.4497461704325024 | 0.6618206408791057 |
| 0.7118608853912755 | 0.0423804811192696 | 0.4868171310603798 |
| 0.1907183261185683 | 0.0636365905344010 | 0.5027839624785629 |
| 0.8544133624389529 | 0.3996010232357168 | 0.3474260607454023 |
| 0.5179823236790480 | 0.7344569419181081 | 0.6796961631455379 |
| 0.3817762887790571 | 0.3696364842688581 | 0.3258264599290714 |
| 0.0457573793787533 | 0.7051934106139992 | 0.6666551701982971 |
| 0.4583201361254466 | 0.5691747063812403 | 0.4899126804075356 |
| 0.4353281551499718 | 0.0257897328803736 | 0.5046897426561331 |
| 0.0998089056330869 | 0.3548543630604607 | 0.3467528534847044 |
| 0.7755771217723569 | 0.7030392807227078 | 0.6797747832427679 |
| 0.1309776180450444 | 0.9113662560290084 | 0.3244840840701321 |
| 0.7953538133982797 | 0.2425081141973782 | 0.6683020529980623 |
| 0.7001397472949753 | 0.3012507697745500 | 0.5007474430715365 |
| 0.7023011299210153 | 0.8025114798207826 | 0.5007880164045797 |
| 0.1985720369242335 | 0.2978323381908378 | 0.4979171023532830 |
| 0.2005659848131778 | 0.7998181846193020 | 0.5000556824376269 |
| 0.8707147899385038 | 0.1290422131285933 | 0.3344244875894727 |
| 0.5251693343760250 | 0.4632444364048597 | 0.6704201858069233 |
| 0.3729357251010897 | 0.6425496140156919 | 0.3364607092078749 |
| 0.0302649180451691 | 0.9575304283316864 | 0.6647408052306825 |
| 0.3670497558371260 | 0.1333421510100866 | 0.3137771941302778 |
| 0.0323941941704298 | 0.4660931818278876 | 0.6856852198790124 |
| 0.8570605850616032 | 0.6295738189957270 | 0.3364371496475945 |
| 0.5474740622581857 | 0.9750582689202643 | 0.6655928933862479 |
| 0.5814173004484905 | 0.5869428007708944 | 0.7585536158417411 |
| 0.5674791244154257 | 0.5217948838799636 | 0.7808290649973607 |



### The perfect Pt<sub>7</sub>-2H\* surface

O In Pt In H

|                     |                     |                     |  |  |
|---------------------|---------------------|---------------------|--|--|
| 1.000000000000000   |                     |                     |  |  |
| 14.4442996979000000 | 0.0000000000000000  | 0.0000000000000000  |  |  |
| -7.2221498489000000 | 12.5091304781999995 | 0.0000000000000000  |  |  |
| 0.0000000000000000  | 0.0000000000000000  | 17.9855003356999994 |  |  |

|    |    |    |    |   |
|----|----|----|----|---|
| O  | In | Pt | In | H |
| 72 | 27 | 1  | 20 | 2 |

Direct

|                    |                    |                    |
|--------------------|--------------------|--------------------|
| 0.8408535854746683 | 0.6131251801609975 | 0.4577923347029988 |
| 0.5157860481135039 | 0.9522129285277220 | 0.2879794987944301 |
| 0.1656929515270074 | 0.2767340445005181 | 0.6157611048588789 |
| 0.7923519695154949 | 0.9605548547302726 | 0.2969346867754940 |
| 0.4646869816919426 | 0.2848550656521294 | 0.6453942776717553 |
| 0.1323013812983747 | 0.6247100249677706 | 0.4686113618987507 |
| 0.3015655146686406 | 0.7299576058151463 | 0.3004524863507783 |
| 0.9773067652372366 | 0.0697979969319068 | 0.6340570097753058 |
| 0.6388141175735077 | 0.4059054303360828 | 0.4678406090590984 |
| 0.5287602137514029 | 0.2103758423720728 | 0.2707291628000796 |
| 0.1825359453499124 | 0.5379199653540818 | 0.6089818874401322 |
| 0.8573364667328555 | 0.8827269101311509 | 0.4400221294016600 |
| 0.8867955590052474 | 0.1300387126518251 | 0.4549176344972437 |
| 0.5468597534171087 | 0.4620783108035559 | 0.2916982671965420 |
| 0.2215202511901118 | 0.7895790685857520 | 0.6196199922779124 |
| 0.5386109363367453 | 0.7302449145537225 | 0.2994111916141196 |
| 0.2053294635590034 | 0.0746790671107990 | 0.6554879171080934 |
| 0.8744815415727927 | 0.4072708740046217 | 0.4684760618445656 |
| 0.7662294562092290 | 0.4682018164611517 | 0.3011725705734743 |
| 0.4322080376958692 | 0.8053222791863450 | 0.6439417772981357 |
| 0.0928800428026007 | 0.1317959157766630 | 0.4605098269148398 |
| 0.2909090834199829 | 0.2189662697677107 | 0.2696983341291264 |
| 0.9592115988298858 | 0.5438667720606535 | 0.6111736689940201 |
| 0.6178525659087196 | 0.8742797736149087 | 0.4404082160420445 |
| 0.3723236480789487 | 0.6569153477040494 | 0.4589911361934170 |
| 0.0363395632113287 | 0.9824520209004931 | 0.2870285905399851 |
| 0.7079611894469848 | 0.3300482889741716 | 0.6212017950802317 |
| 0.7664229193718755 | 0.7059712528146290 | 0.3001333220171941 |
| 0.4234626389244852 | 0.0260577159963732 | 0.6535872944743619 |
| 0.0892902011615092 | 0.3644120382895962 | 0.4671688667142570 |
| 0.0297146005416566 | 0.1977094912508210 | 0.2974820248614202 |
| 0.6998646401063244 | 0.5344404489508318 | 0.6367672481659399 |
| 0.3652515246976922 | 0.8582495712393836 | 0.4661840877305221 |
| 0.2809562351800606 | 0.9698211836810110 | 0.2675099674953357 |
| 0.9546129655170139 | 0.3161279813143885 | 0.6109031048080126 |

|                    |                    |                    |
|--------------------|--------------------|--------------------|
| 0.6244276649000031 | 0.6426200607884353 | 0.4455504291605047 |
| 0.2249428054233502 | 0.3167905568162596 | 0.3764816919273172 |
| 0.8893564409428972 | 0.6493881663264072 | 0.7130369270931572 |
| 0.5576422839167968 | 0.9848245711590253 | 0.5439586307156048 |
| 0.2673633196293991 | 0.9739864700024784 | 0.5301891395545266 |
| 0.9270525576718580 | 0.3058459410806471 | 0.3413783215015891 |
| 0.6093438375485718 | 0.6653204052460445 | 0.7094419841396356 |
| 0.7579247629127821 | 0.1943247164410383 | 0.5352121719731611 |
| 0.4232344189036081 | 0.5276931014644881 | 0.3683212381061949 |
| 0.1008945598863173 | 0.8663820704296785 | 0.6987778516496062 |
| 0.5458529621597981 | 0.7235166059542147 | 0.5613140064816863 |
| 0.2151493231954631 | 0.0572096515058255 | 0.3858240366480465 |
| 0.8707623527479833 | 0.3909487551310273 | 0.7300649839511274 |
| 0.1832747234429633 | 0.8091091916024709 | 0.3779441328595885 |
| 0.8522282198629999 | 0.1371478908605716 | 0.7089682639367320 |
| 0.5139681226839321 | 0.4720741644875627 | 0.5535374345714265 |
| 0.5264498769748036 | 0.1901305008228509 | 0.5294533694107013 |
| 0.1942139267944994 | 0.5213661472648397 | 0.3491156489129823 |
| 0.8652791760092856 | 0.8699252675344368 | 0.7031734274395749 |
| 0.3016790818459465 | 0.4604094275049670 | 0.5327356335916938 |
| 0.9712482423234489 | 0.7928908548628435 | 0.3635255151992368 |
| 0.6333907689499373 | 0.1348884960484246 | 0.7019351785817782 |
| 0.7859041003243695 | 0.7312630117667765 | 0.5590631449686623 |
| 0.4390605556678689 | 0.0533128886376953 | 0.3872128260298815 |
| 0.1109345623566952 | 0.3805309460151804 | 0.7276375687630078 |
| 0.6898243584849616 | 0.2722955735880084 | 0.3798937094480801 |
| 0.3676718824608345 | 0.6128282391807008 | 0.7020178256913064 |
| 0.0300486319761758 | 0.9420839415962786 | 0.5423001450655041 |
| 0.3033117731224930 | 0.2297239771947946 | 0.5283168495138660 |
| 0.9773719362367406 | 0.5713234541639807 | 0.3456277352327910 |
| 0.6372007577757079 | 0.8977611975395685 | 0.6955149626670811 |
| 0.0364083865162908 | 0.7407597374399492 | 0.5342356268067212 |
| 0.7055098093803339 | 0.0768536673940062 | 0.3636576448328095 |
| 0.3598297161884055 | 0.3919805207958115 | 0.6977116280423903 |
| 0.7763640509270118 | 0.9586808028684884 | 0.5561281290644733 |
| 0.4428204608084602 | 0.2832311469226445 | 0.3917590932362783 |
| 0.1191171258262759 | 0.6269971852173102 | 0.7299466956145054 |
| 0.1390998114130118 | 0.1441693073171570 | 0.3297334171920200 |
| 0.8120840259920639 | 0.4834612845299848 | 0.6758257731991006 |
| 0.5977001084181585 | 0.6217888809962659 | 0.3247202866358508 |
| 0.2564930446380795 | 0.9533054010013023 | 0.6518087280578884 |
| 0.9239294838519901 | 0.2899605605013242 | 0.4953662688666690 |
| 0.4717563519629885 | 0.8115048733003705 | 0.5112522035498264 |
| 0.3541637144773658 | 0.8934131041712734 | 0.3299516186938926 |

|                    |                    |                    |
|--------------------|--------------------|--------------------|
| 0.0172018046091383 | 0.2299267059680283 | 0.6734067539870482 |
| 0.8760978689063521 | 0.8747950060490032 | 0.3202469494155149 |
| 0.5449748967572204 | 0.1991988833783699 | 0.6512468455771649 |
| 0.2076841983155057 | 0.5324562679863885 | 0.4923529595785194 |
| 0.6881148857108432 | 0.5591156155595323 | 0.5169296142051583 |
| 0.6040139911044778 | 0.3589676676780744 | 0.3356936971618625 |
| 0.2661469347497937 | 0.6831739487393286 | 0.6734271888782327 |
| 0.6242256300715346 | 0.9002265847701492 | 0.3201468962840630 |
| 0.2921480273226565 | 0.2401455940306930 | 0.6497866714963040 |
| 0.9645577226537246 | 0.5742449047264033 | 0.4951312773952808 |
| 0.9417442257291782 | 0.0304784986313548 | 0.5106393501245987 |
| 0.9312781741175314 | 0.7893987881475503 | 0.4860087255738631 |
| 0.4735475914752894 | 0.3097733887708171 | 0.5092335721644007 |
| 0.1445873993180286 | 0.6447830313113421 | 0.3469608367624135 |
| 0.8054950013933138 | 0.9778595619432716 | 0.6755925495711792 |
| 0.5877895077910515 | 0.1185829597017221 | 0.3248444766854910 |
| 0.2577984553043327 | 0.4488358905739973 | 0.6608640661316496 |
| 0.7111566782350013 | 0.0418433439673792 | 0.4860445833111525 |
| 0.1900743183240963 | 0.0628376655223353 | 0.5009975055711317 |
| 0.8535181662330787 | 0.3988098308012496 | 0.3466184236963689 |
| 0.5160691742061174 | 0.7382126307930679 | 0.6809096587567142 |
| 0.3810752728825732 | 0.3681806734350373 | 0.3273045273935291 |
| 0.0474663173097632 | 0.7048088351715862 | 0.6665117023462533 |
| 0.4588321877840595 | 0.5674381982533315 | 0.4929508294894994 |
| 0.4349255167348575 | 0.0245898734648552 | 0.5031643233818310 |
| 0.0982804848531158 | 0.3536264313000019 | 0.3453822582831119 |
| 0.7850080470269901 | 0.7038853828136132 | 0.6770729877648348 |
| 0.1303145256570944 | 0.9099313940927601 | 0.3227029235991409 |
| 0.7947602503215409 | 0.2421997075503895 | 0.6673057807179358 |
| 0.6995541847462858 | 0.3008041661325556 | 0.5002195773915431 |
| 0.7018790751050685 | 0.8020087017413886 | 0.4999510139186307 |
| 0.1963520585695194 | 0.2961751605591764 | 0.4963527158805695 |
| 0.2003266755513723 | 0.7990487563777404 | 0.4988788502095709 |
| 0.8694748344992567 | 0.1279653202516772 | 0.3333702372804994 |
| 0.5289818087810891 | 0.4547525159138050 | 0.6797823369906895 |
| 0.3727874734873184 | 0.6408158210240111 | 0.3375030016526351 |
| 0.0309604917421921 | 0.9580659899304627 | 0.6637415638079606 |
| 0.3663273239972138 | 0.1324401960392071 | 0.3138507592647168 |
| 0.0323968936218823 | 0.4650879801455159 | 0.6849866001848607 |
| 0.8563053031984588 | 0.6285411308635842 | 0.3361312716290548 |
| 0.5471765481298105 | 0.9761477206838980 | 0.6648023461797782 |
| 0.6003022195230228 | 0.6524833302942343 | 0.7626750756163054 |
| 0.5775355312964887 | 0.4670858309913568 | 0.7718046364879080 |

### The perfect Pt<sub>7</sub>-[TS-H<sub>2</sub>O]\* surface

O In Pt In H

|                     |                     |                     |  |  |
|---------------------|---------------------|---------------------|--|--|
| 1.000000000000000   |                     |                     |  |  |
| 14.4442996979000000 | 0.0000000000000000  | 0.0000000000000000  |  |  |
| -7.2221498489000000 | 12.5091304781999995 | 0.0000000000000000  |  |  |
| 0.0000000000000000  | 0.0000000000000000  | 17.9855003356999994 |  |  |

|    |    |    |    |   |
|----|----|----|----|---|
| O  | In | Pt | In | H |
| 72 | 27 | 1  | 20 | 2 |

Direct

|                    |                    |                    |
|--------------------|--------------------|--------------------|
| 0.8463519168660258 | 0.6118051256152116 | 0.4527200771844986 |
| 0.5177644117080421 | 0.9515591212291604 | 0.2874650011699060 |
| 0.1724513060599240 | 0.2802181282775221 | 0.6191199436185654 |
| 0.7942835247264457 | 0.9590366100606371 | 0.2984648394761821 |
| 0.4621185638064557 | 0.2827578388389052 | 0.6613892129057616 |
| 0.1330833072553906 | 0.6223533398373424 | 0.4670882834823836 |
| 0.3032735845181972 | 0.7307038346867497 | 0.2983441491519877 |
| 0.9767179322530394 | 0.0673975003572067 | 0.6365003297148545 |
| 0.6408952028923773 | 0.4041099051539336 | 0.4601456309389280 |
| 0.5297456181865614 | 0.2064855313100102 | 0.2665482041220030 |
| 0.1871105715035719 | 0.5410959349720096 | 0.6097022031752063 |
| 0.8556501457346879 | 0.8766968666525164 | 0.4425258130709012 |
| 0.8868941172777625 | 0.1268944381998168 | 0.4573434808428138 |
| 0.5475676234771407 | 0.4606397633773394 | 0.2847157968608564 |
| 0.2227215236921733 | 0.7901226927130603 | 0.6204105959622305 |
| 0.5404535220719120 | 0.7300372152321649 | 0.2961187677954724 |
| 0.2050824809354997 | 0.0743825178330009 | 0.6522856556957799 |
| 0.8753221518958165 | 0.4067805067368575 | 0.4667371611261140 |
| 0.7696013871076798 | 0.4671855906897093 | 0.2964576290380952 |
| 0.4332231363233965 | 0.8050290374229997 | 0.6415382968621457 |
| 0.0952367964475936 | 0.1321635522821835 | 0.4654289815712499 |
| 0.2902556223957714 | 0.2168994559063261 | 0.2668937489189085 |
| 0.9575583671484748 | 0.5395624255236520 | 0.6106901977154482 |
| 0.6195202996449126 | 0.8753655272643120 | 0.4404284339451928 |
| 0.3702535495696780 | 0.6551745647730193 | 0.4548833011777718 |
| 0.0380203619399484 | 0.9823119891935680 | 0.2889818198729616 |
| 0.7044131503321005 | 0.3414463917571398 | 0.6177608457410556 |
| 0.7713169555582553 | 0.7053334115228757 | 0.2948501369758495 |
| 0.4245995556413260 | 0.0285024614299732 | 0.6554926209323375 |
| 0.0950447581467572 | 0.3663378013143934 | 0.4679663234664429 |
| 0.0316144848637597 | 0.1971249273119128 | 0.2990284713391937 |
| 0.6805993211504393 | 0.5373476545336123 | 0.6890266343202682 |
| 0.3691525990170658 | 0.8562733754779213 | 0.4684142761651844 |
| 0.2821027695838477 | 0.9686488254986398 | 0.2677077316293544 |
| 0.9581343151538704 | 0.3153986105181277 | 0.6089343826564280 |

|                    |                    |                    |
|--------------------|--------------------|--------------------|
| 0.6293860819256915 | 0.6411109266106363 | 0.4355252096737938 |
| 0.2282731780088935 | 0.3149567571854340 | 0.3775238640908066 |
| 0.8940862608069231 | 0.6474933602455384 | 0.7083983778420946 |
| 0.5600239864102908 | 0.9854279998870794 | 0.5458158113067372 |
| 0.2693808676975858 | 0.9731701723331088 | 0.5302007521410350 |
| 0.9294662200253895 | 0.3039736473149995 | 0.3482421866159240 |
| 0.5684290788960515 | 0.6900393257552592 | 0.7936873800955152 |
| 0.7596351453372551 | 0.1965275657611971 | 0.5357326610491282 |
| 0.4250278871675865 | 0.5266500157194014 | 0.3636817182585000 |
| 0.1003705491734949 | 0.8656983039635260 | 0.6987178949489513 |
| 0.5468251980025277 | 0.7125882622380432 | 0.5526956849321458 |
| 0.2179088760472513 | 0.0587136648842296 | 0.3871138170820737 |
| 0.8697938992402915 | 0.3863258073886730 | 0.7289393519661362 |
| 0.1859716309348502 | 0.8086352034931754 | 0.3783943461552176 |
| 0.8539177072371957 | 0.1374664710353346 | 0.7084403613614255 |
| 0.5238312157246526 | 0.4700151467783266 | 0.5458972849870996 |
| 0.5261417695585401 | 0.1920035330423222 | 0.5296072566671954 |
| 0.1956187259542426 | 0.5202030184320433 | 0.3427758207403987 |
| 0.8594623069873292 | 0.8660178404136563 | 0.7036724106179917 |
| 0.3087342905987774 | 0.4622445807939070 | 0.5344992404427928 |
| 0.9737041747140393 | 0.7925297527933135 | 0.3634151341952546 |
| 0.6367582559240047 | 0.1403509165547003 | 0.6991763539977216 |
| 0.7801535518145887 | 0.7121799154330938 | 0.5597549122120565 |
| 0.4415167996016767 | 0.0533971543636961 | 0.3873785094066668 |
| 0.1117014234673693 | 0.3807008275892865 | 0.7278420869276497 |
| 0.6913913905522805 | 0.2718414584939022 | 0.3769248698869712 |
| 0.3564053010085275 | 0.6147085300848019 | 0.7199172522183099 |
| 0.0285093376255102 | 0.9381901473617528 | 0.5432212653215825 |
| 0.3100228136475289 | 0.2322057289636175 | 0.5299488710310799 |
| 0.9801751594976134 | 0.5699814233106969 | 0.3396668326382720 |
| 0.6343269438086857 | 0.9058564594705343 | 0.7111927219349178 |
| 0.0384249687279292 | 0.7383803460640016 | 0.5342229507274169 |
| 0.7077877567089119 | 0.0768455356700992 | 0.3642269877486178 |
| 0.3668385546016154 | 0.4000551738830027 | 0.7008142310798067 |
| 0.7742045164755810 | 0.9538828273353488 | 0.5584922411589499 |
| 0.4452710491311238 | 0.2824467282175884 | 0.3838038447351858 |
| 0.1155059402774367 | 0.6251913088647953 | 0.7296663000015932 |
| 0.1412509843857399 | 0.1436658320580479 | 0.3306024118379259 |
| 0.8114928107771435 | 0.4812302415602153 | 0.6801424050392656 |
| 0.6005342861401133 | 0.6215829091524825 | 0.3164241702691350 |
| 0.2573109946711849 | 0.9535793274836823 | 0.6519917885384361 |
| 0.9269113928683531 | 0.2902014784833027 | 0.4925188291914973 |
| 0.4744172092158752 | 0.8057782089198080 | 0.5155682296352980 |
| 0.3565985027773761 | 0.8928524662783306 | 0.3303487051726570 |

|                    |                    |                    |
|--------------------|--------------------|--------------------|
| 0.0196599963651733 | 0.2295787404450348 | 0.6734837111941894 |
| 0.8774534043458503 | 0.8730074384791483 | 0.3208878972009446 |
| 0.5462936170481859 | 0.2022228255153649 | 0.6512888184181526 |
| 0.2120477994006730 | 0.5337697936479227 | 0.4936475744715237 |
| 0.6902920470858899 | 0.5591058809201922 | 0.5000299929256622 |
| 0.6067208202422776 | 0.3576626719824202 | 0.3264652698330973 |
| 0.2661517924020523 | 0.6853013652573900 | 0.6773699294554748 |
| 0.6256573110539843 | 0.8993870009979271 | 0.3209521393002609 |
| 0.2938780921878078 | 0.2405163745294718 | 0.6519254888523969 |
| 0.9668872599857903 | 0.5717785389678733 | 0.4953442236820135 |
| 0.9413123985510795 | 0.0274100036182142 | 0.5128694339015034 |
| 0.9333283700423660 | 0.7865575998549015 | 0.4853316946623329 |
| 0.4744103497838876 | 0.3061896949150343 | 0.4985497215210238 |
| 0.1469011293709630 | 0.6436744002564875 | 0.3450310077854580 |
| 0.7995298517275192 | 0.9760947119936054 | 0.6772369210309184 |
| 0.5896965270188471 | 0.1171651314772120 | 0.3239251198874750 |
| 0.2615643218033332 | 0.4559892950889077 | 0.6643719052986918 |
| 0.7112214447726352 | 0.0406080687453626 | 0.4870032439957726 |
| 0.1917370760660883 | 0.0624939755078876 | 0.5031113956981860 |
| 0.8560004462410986 | 0.3980641112744123 | 0.3447484882235181 |
| 0.5025469998898864 | 0.7508861973415044 | 0.7115844217571727 |
| 0.3815799799824131 | 0.3678544574043550 | 0.3218458991838002 |
| 0.0504732138392605 | 0.7044488357255748 | 0.6629987642172365 |
| 0.4618599538228988 | 0.5694052790615765 | 0.4868237800455569 |
| 0.4374813935070906 | 0.0229606990367749 | 0.5032891050971229 |
| 0.1022910041458640 | 0.3535740056684198 | 0.3457902169248634 |
| 0.7920137740225079 | 0.7039248219273722 | 0.6789376759940663 |
| 0.1328510142448966 | 0.9103697695699867 | 0.3243041970883996 |
| 0.7972391511433627 | 0.2407909956564026 | 0.6643505846150849 |
| 0.7016785054363212 | 0.3015079260564412 | 0.4979154434224936 |
| 0.6988936273959542 | 0.7968933570086695 | 0.4992713128792538 |
| 0.2010610867536709 | 0.2980510667615646 | 0.4979984052122887 |
| 0.2039213144131743 | 0.7977489365475373 | 0.4985444544080866 |
| 0.8713443568101451 | 0.1258929596860494 | 0.3352447558497453 |
| 0.5214312894471094 | 0.4511608283107104 | 0.6655231131305366 |
| 0.3736392230156634 | 0.6401625380135331 | 0.3341734994137662 |
| 0.0307458031346952 | 0.9571546502667875 | 0.6643355398283812 |
| 0.3674375907004216 | 0.1310743001384637 | 0.3107928724079447 |
| 0.0328486582550469 | 0.4642661128778069 | 0.6838234981600065 |
| 0.8624069328100434 | 0.6287673793974479 | 0.3304442673083461 |
| 0.5459791436129200 | 0.9777958574519171 | 0.6666781331473092 |
| 0.5048261225245930 | 0.6361294771661724 | 0.8194725820339300 |
| 0.6074476296902369 | 0.7475372182637410 | 0.8291316554052965 |

### The perfect Pt<sub>7</sub>-H<sub>2</sub>O\* surface

O In Pt In H

|                     |                     |                     |  |  |
|---------------------|---------------------|---------------------|--|--|
| 1.000000000000000   |                     |                     |  |  |
| 14.4442996979000000 | 0.0000000000000000  | 0.0000000000000000  |  |  |
| -7.2221498489000000 | 12.5091304781999995 | 0.0000000000000000  |  |  |
| 0.0000000000000000  | 0.0000000000000000  | 17.9855003356999994 |  |  |

|    |    |    |    |   |
|----|----|----|----|---|
| O  | In | Pt | In | H |
| 72 | 27 | 1  | 20 | 2 |

Direct

|                    |                    |                    |
|--------------------|--------------------|--------------------|
| 0.8463519168660258 | 0.6118051256152116 | 0.4527200771844986 |
| 0.5177644117080421 | 0.9515591212291604 | 0.2874650011699060 |
| 0.1724513060599240 | 0.2802181282775221 | 0.6191199436185654 |
| 0.7942835247264457 | 0.9590366100606371 | 0.2984648394761821 |
| 0.4621185638064557 | 0.2827578388389052 | 0.6613892129057616 |
| 0.1330833072553906 | 0.6223533398373424 | 0.4670882834823836 |
| 0.3032735845181972 | 0.7307038346867497 | 0.2983441491519877 |
| 0.9767179322530394 | 0.0673975003572067 | 0.6365003297148545 |
| 0.6408952028923773 | 0.4041099051539336 | 0.4601456309389280 |
| 0.5297456181865614 | 0.2064855313100102 | 0.2665482041220030 |
| 0.1871105715035719 | 0.5410959349720096 | 0.6097022031752063 |
| 0.8556501457346879 | 0.8766968666525164 | 0.4425258130709012 |
| 0.8868941172777625 | 0.1268944381998168 | 0.4573434808428138 |
| 0.5475676234771407 | 0.4606397633773394 | 0.2847157968608564 |
| 0.2227215236921733 | 0.7901226927130603 | 0.6204105959622305 |
| 0.5404535220719120 | 0.7300372152321649 | 0.2961187677954724 |
| 0.2050824809354997 | 0.0743825178330009 | 0.6522856556957799 |
| 0.8753221518958165 | 0.4067805067368575 | 0.4667371611261140 |
| 0.7696013871076798 | 0.4671855906897093 | 0.2964576290380952 |
| 0.4332231363233965 | 0.8050290374229997 | 0.6415382968621457 |
| 0.0952367964475936 | 0.1321635522821835 | 0.4654289815712499 |
| 0.2902556223957714 | 0.2168994559063261 | 0.2668937489189085 |
| 0.9575583671484748 | 0.5395624255236520 | 0.6106901977154482 |
| 0.6195202996449126 | 0.8753655272643120 | 0.4404284339451928 |
| 0.3702535495696780 | 0.6551745647730193 | 0.4548833011777718 |
| 0.0380203619399484 | 0.9823119891935680 | 0.2889818198729616 |
| 0.7044131503321005 | 0.3414463917571398 | 0.6177608457410556 |
| 0.7713169555582553 | 0.7053334115228757 | 0.2948501369758495 |
| 0.4245995556413260 | 0.0285024614299732 | 0.6554926209323375 |
| 0.0950447581467572 | 0.3663378013143934 | 0.4679663234664429 |
| 0.0316144848637597 | 0.1971249273119128 | 0.2990284713391937 |
| 0.6805993211504393 | 0.5373476545336123 | 0.6890266343202682 |
| 0.3691525990170658 | 0.8562733754779213 | 0.4684142761651844 |
| 0.2821027695838477 | 0.9686488254986398 | 0.2677077316293544 |
| 0.9581343151538704 | 0.3153986105181277 | 0.6089343826564280 |

|                    |                    |                    |
|--------------------|--------------------|--------------------|
| 0.6293860819256915 | 0.6411109266106363 | 0.4355252096737938 |
| 0.2282731780088935 | 0.3149567571854340 | 0.3775238640908066 |
| 0.8940862608069231 | 0.6474933602455384 | 0.7083983778420946 |
| 0.5600239864102908 | 0.9854279998870794 | 0.5458158113067372 |
| 0.2693808676975858 | 0.9731701723331088 | 0.5302007521410350 |
| 0.9294662200253895 | 0.3039736473149995 | 0.3482421866159240 |
| 0.5684290788960515 | 0.6900393257552592 | 0.7936873800955152 |
| 0.7596351453372551 | 0.1965275657611971 | 0.5357326610491282 |
| 0.4250278871675865 | 0.5266500157194014 | 0.3636817182585000 |
| 0.1003705491734949 | 0.8656983039635260 | 0.6987178949489513 |
| 0.5468251980025277 | 0.7125882622380432 | 0.5526956849321458 |
| 0.2179088760472513 | 0.0587136648842296 | 0.3871138170820737 |
| 0.8697938992402915 | 0.3863258073886730 | 0.7289393519661362 |
| 0.1859716309348502 | 0.8086352034931754 | 0.3783943461552176 |
| 0.8539177072371957 | 0.1374664710353346 | 0.7084403613614255 |
| 0.5238312157246526 | 0.4700151467783266 | 0.5458972849870996 |
| 0.5261417695585401 | 0.1920035330423222 | 0.5296072566671954 |
| 0.1956187259542426 | 0.5202030184320433 | 0.3427758207403987 |
| 0.8594623069873292 | 0.8660178404136563 | 0.7036724106179917 |
| 0.3087342905987774 | 0.4622445807939070 | 0.5344992404427928 |
| 0.9737041747140393 | 0.7925297527933135 | 0.3634151341952546 |
| 0.6367582559240047 | 0.1403509165547003 | 0.6991763539977216 |
| 0.7801535518145887 | 0.7121799154330938 | 0.5597549122120565 |
| 0.4415167996016767 | 0.0533971543636961 | 0.3873785094066668 |
| 0.1117014234673693 | 0.3807008275892865 | 0.7278420869276497 |
| 0.6913913905522805 | 0.2718414584939022 | 0.3769248698869712 |
| 0.3564053010085275 | 0.6147085300848019 | 0.7199172522183099 |
| 0.0285093376255102 | 0.9381901473617528 | 0.5432212653215825 |
| 0.3100228136475289 | 0.2322057289636175 | 0.5299488710310799 |
| 0.9801751594976134 | 0.5699814233106969 | 0.3396668326382720 |
| 0.6343269438086857 | 0.9058564594705343 | 0.7111927219349178 |
| 0.0384249687279292 | 0.7383803460640016 | 0.5342229507274169 |
| 0.7077877567089119 | 0.0768455356700992 | 0.3642269877486178 |
| 0.3668385546016154 | 0.4000551738830027 | 0.7008142310798067 |
| 0.7742045164755810 | 0.9538828273353488 | 0.5584922411589499 |
| 0.4452710491311238 | 0.2824467282175884 | 0.3838038447351858 |
| 0.1155059402774367 | 0.6251913088647953 | 0.7296663000015932 |
| 0.1412509843857399 | 0.1436658320580479 | 0.3306024118379259 |
| 0.8114928107771435 | 0.4812302415602153 | 0.6801424050392656 |
| 0.6005342861401133 | 0.6215829091524825 | 0.3164241702691350 |
| 0.2573109946711849 | 0.9535793274836823 | 0.6519917885384361 |
| 0.9269113928683531 | 0.2902014784833027 | 0.4925188291914973 |
| 0.4744172092158752 | 0.8057782089198080 | 0.5155682296352980 |
| 0.3565985027773761 | 0.8928524662783306 | 0.3303487051726570 |



|                    |                    |                    |
|--------------------|--------------------|--------------------|
| 0.0196599963651733 | 0.2295787404450348 | 0.6734837111941894 |
| 0.8774534043458503 | 0.8730074384791483 | 0.3208878972009446 |
| 0.5462936170481859 | 0.2022228255153649 | 0.6512888184181526 |
| 0.2120477994006730 | 0.5337697936479227 | 0.4936475744715237 |
| 0.6902920470858899 | 0.5591058809201922 | 0.5000299929256622 |
| 0.6067208202422776 | 0.3576626719824202 | 0.3264652698330973 |
| 0.2661517924020523 | 0.6853013652573900 | 0.6773699294554748 |
| 0.6256573110539843 | 0.8993870009979271 | 0.3209521393002609 |
| 0.2938780921878078 | 0.2405163745294718 | 0.6519254888523969 |
| 0.9668872599857903 | 0.5717785389678733 | 0.4953442236820135 |
| 0.9413123985510795 | 0.0274100036182142 | 0.5128694339015034 |
| 0.9333283700423660 | 0.7865575998549015 | 0.4853316946623329 |
| 0.4744103497838876 | 0.3061896949150343 | 0.4985497215210238 |
| 0.1469011293709630 | 0.6436744002564875 | 0.3450310077854580 |
| 0.7995298517275192 | 0.9760947119936054 | 0.6772369210309184 |
| 0.5896965270188471 | 0.1171651314772120 | 0.3239251198874750 |
| 0.2615643218033332 | 0.4559892950889077 | 0.6643719052986918 |
| 0.7112214447726352 | 0.0406080687453626 | 0.4870032439957726 |
| 0.1917370760660883 | 0.0624939755078876 | 0.5031113956981860 |
| 0.8560004462410986 | 0.3980641112744123 | 0.3447484882235181 |
| 0.5025469998898864 | 0.7508861973415044 | 0.7115844217571727 |
| 0.3815799799824131 | 0.3678544574043550 | 0.3218458991838002 |
| 0.0504732138392605 | 0.7044488357255748 | 0.6629987642172365 |
| 0.4618599538228988 | 0.5694052790615765 | 0.4868237800455569 |
| 0.4374813935070906 | 0.0229606990367749 | 0.5032891050971229 |
| 0.1022910041458640 | 0.3535740056684198 | 0.3457902169248634 |
| 0.7920137740225079 | 0.7039248219273722 | 0.6789376759940663 |
| 0.1328510142448966 | 0.9103697695699867 | 0.3243041970883996 |
| 0.7972391511433627 | 0.2407909956564026 | 0.6643505846150849 |
| 0.7016785054363212 | 0.3015079260564412 | 0.4979154434224936 |
| 0.6988936273959542 | 0.7968933570086695 | 0.4992713128792538 |
| 0.2010610867536709 | 0.2980510667615646 | 0.4979984052122887 |
| 0.2039213144131743 | 0.7977489365475373 | 0.4985444544080866 |
| 0.8713443568101451 | 0.1258929596860494 | 0.3352447558497453 |
| 0.5214312894471094 | 0.4511608283107104 | 0.6655231131305366 |
| 0.3736392230156634 | 0.6401625380135331 | 0.3341734994137662 |
| 0.0307458031346952 | 0.9571546502667875 | 0.6643355398283812 |
| 0.3674375907004216 | 0.1310743001384637 | 0.3107928724079447 |
| 0.0328486582550469 | 0.4642661128778069 | 0.6838234981600065 |
| 0.8624069328100434 | 0.6287673793974479 | 0.3304442673083461 |
| 0.5459791436129200 | 0.9777958574519171 | 0.6666781331473092 |
| 0.5048261225245930 | 0.6361294771661724 | 0.8194725820339300 |
| 0.6074476296902369 | 0.7475372182637410 | 0.8291316554052965 |

### The perfect Cu<sub>7</sub> doped c-In<sub>2</sub>O<sub>3</sub>(111) surface

O In Cu In

|                     |                     |                     |  |
|---------------------|---------------------|---------------------|--|
| 1.000000000000000   |                     |                     |  |
| 14.4442996979000000 | 0.0000000000000000  | 0.0000000000000000  |  |
| -7.2221498489000000 | 12.5091304781999995 | 0.0000000000000000  |  |
| 0.0000000000000000  | 0.0000000000000000  | 17.9855003356999994 |  |

|    |    |    |    |
|----|----|----|----|
| O  | In | Cu | In |
| 72 | 27 | 1  | 20 |

Direct

|                    |                    |                    |
|--------------------|--------------------|--------------------|
| 0.8421793646059229 | 0.6129181692896872 | 0.4578895833828244 |
| 0.5160360171215115 | 0.9531378514408553 | 0.2884653295662430 |
| 0.1717280317138216 | 0.2802236796346986 | 0.6198623117496618 |
| 0.7937723747134544 | 0.9616072152029207 | 0.2972691019512579 |
| 0.4705819539734584 | 0.2943519718521002 | 0.6481037770354345 |
| 0.1320777615617709 | 0.6240816018158429 | 0.4692688480324100 |
| 0.3007549573091083 | 0.7320369442655703 | 0.2992285954632518 |
| 0.9776041821064732 | 0.0697811279647835 | 0.6358894285260071 |
| 0.6406843529467752 | 0.4060408972452060 | 0.4692740724722327 |
| 0.5284787656487069 | 0.2096500520155341 | 0.2710154586477116 |
| 0.1834951814911298 | 0.5395573615618589 | 0.6111250177773733 |
| 0.8568919051211425 | 0.8821075019687710 | 0.4413739114045383 |
| 0.8872957039310743 | 0.1292649700041084 | 0.4561231141812545 |
| 0.5472207832826208 | 0.4622086495374259 | 0.2893671378748863 |
| 0.2240169777620167 | 0.7903914220902254 | 0.6214088281230329 |
| 0.5393236798949443 | 0.7318628019315374 | 0.2972597863530880 |
| 0.2067121068447162 | 0.0763751004151936 | 0.6555174265617189 |
| 0.8748968771204143 | 0.4076362630273208 | 0.4695020268227721 |
| 0.7673241956374562 | 0.4690221796696550 | 0.3011950925457720 |
| 0.4375117228480697 | 0.8012258978877708 | 0.6465081512873280 |
| 0.0942765502927678 | 0.1335992228104704 | 0.4648628135640299 |
| 0.2906418078928726 | 0.2187038391053180 | 0.2712711132571028 |
| 0.9582544527384209 | 0.5430526610946957 | 0.6120615673365303 |
| 0.6195138242921737 | 0.8773702058084299 | 0.4391045197466951 |
| 0.3676427021274145 | 0.6568853184103665 | 0.4545784536435197 |
| 0.0375577837755225 | 0.9839293786890642 | 0.2899408103427695 |
| 0.7089465573605582 | 0.3301283882791707 | 0.6216368164278725 |
| 0.7693772123971805 | 0.7074553038676121 | 0.2971734648660703 |
| 0.4240993554013254 | 0.0259366668533085 | 0.6546394087592903 |
| 0.0918257754556842 | 0.3666484169784917 | 0.4687964402797938 |
| 0.0312858429408286 | 0.1989678959107176 | 0.2996146144723288 |
| 0.6865284849497800 | 0.5272118509011056 | 0.6424677974380794 |
| 0.3666121706825763 | 0.8578324382763308 | 0.4686823403309868 |
| 0.2811636510364298 | 0.9708833452398800 | 0.2702726656775060 |
| 0.9553541373270270 | 0.3155151101363406 | 0.6113656889034981 |

|                    |                    |                    |
|--------------------|--------------------|--------------------|
| 0.6283067563468845 | 0.6423254019351122 | 0.4395431466020158 |
| 0.2268986344350452 | 0.3177456580286901 | 0.3788719658966822 |
| 0.8828499592049422 | 0.6500432434045214 | 0.7069628965688658 |
| 0.5585355194523887 | 0.9834795770530036 | 0.5461244404592110 |
| 0.2678140600413302 | 0.9738243762322576 | 0.5317669909502071 |
| 0.9280571921436244 | 0.3062824887271595 | 0.3456725739855431 |
| 0.5967047348703185 | 0.6529804088419400 | 0.6962914053199778 |
| 0.7586241188090668 | 0.1944426155842610 | 0.5350199781062280 |
| 0.4230697858063683 | 0.5294314258128319 | 0.3636984158190457 |
| 0.1009654466665320 | 0.8666334034520149 | 0.6999368767231448 |
| 0.5432110277423365 | 0.7186410120417970 | 0.5525583105020967 |
| 0.2160859571876359 | 0.0587449790536112 | 0.3891653060903766 |
| 0.8701087589721140 | 0.3911045797308672 | 0.7305079043792574 |
| 0.1841002150674544 | 0.8095748727921389 | 0.3800911211792008 |
| 0.8505960790220116 | 0.1353410338556988 | 0.7085948641048264 |
| 0.5116221607182694 | 0.4734241918014460 | 0.5435212234418820 |
| 0.5264150123860936 | 0.1903020758599577 | 0.5310133814200366 |
| 0.1931746060522987 | 0.5216994610648217 | 0.3440729239234614 |
| 0.8623641747028031 | 0.8686243059680226 | 0.7029505388456676 |
| 0.3046134084398676 | 0.4636033090334075 | 0.5339086919672301 |
| 0.9717533178419708 | 0.7935199909886661 | 0.3655235601773504 |
| 0.6328328062626571 | 0.1333460460522352 | 0.7010960262835831 |
| 0.7823786983796499 | 0.7262194698341859 | 0.5585556075955380 |
| 0.4405822144511550 | 0.0539192664679765 | 0.3895915228305568 |
| 0.1106532080568445 | 0.3808603458058534 | 0.7286040003955017 |
| 0.6900992501400296 | 0.2734722377053646 | 0.3799882554017225 |
| 0.3725216627954409 | 0.6164076657005796 | 0.7016809869913041 |
| 0.0291985454419339 | 0.9409536297858242 | 0.5440114845155891 |
| 0.3061531593713511 | 0.2314217482079609 | 0.5303358684270192 |
| 0.9777480116744515 | 0.5720492907929303 | 0.3460044094757576 |
| 0.6314076840167675 | 0.8870398348655293 | 0.6990684025489866 |
| 0.0371492826791173 | 0.7406483785194198 | 0.5360679381550315 |
| 0.7070853652648684 | 0.0787675650600781 | 0.3634217820706191 |
| 0.3653801656876056 | 0.3982933430204701 | 0.7015962659636853 |
| 0.7751897246117808 | 0.9570481071125390 | 0.5572820516233892 |
| 0.4451845433943510 | 0.2851757419094807 | 0.3911951030687225 |
| 0.1195404950632540 | 0.6284567419476561 | 0.7300867414736568 |
| 0.1401137014636241 | 0.1451267527088463 | 0.3329474074197886 |
| 0.8098279618735318 | 0.4833759563797018 | 0.6759185191802501 |
| 0.5994951678403913 | 0.6233199947414179 | 0.3205243905500020 |
| 0.2569545219003956 | 0.9536313078117065 | 0.6532057050482674 |
| 0.9250228644323737 | 0.2901817463590913 | 0.4951435364354702 |
| 0.4730443777074897 | 0.8093022706447315 | 0.5122400640587303 |
| 0.3550164186581851 | 0.8944021895124952 | 0.3317553376648357 |

|                    |                    |                    |
|--------------------|--------------------|--------------------|
| 0.0178219190408656 | 0.2294032255587257 | 0.6740692142559166 |
| 0.8768036554390227 | 0.8754069646658589 | 0.3215081048117130 |
| 0.5446588170876350 | 0.2008489595347710 | 0.6524847798145096 |
| 0.2091349876676460 | 0.5341622550206305 | 0.4945676208577482 |
| 0.6879969785575965 | 0.5600865353951180 | 0.5139849443689429 |
| 0.6048892852626019 | 0.3596235199396048 | 0.3340004066218746 |
| 0.2700470916140736 | 0.6852628064024430 | 0.6758186596211770 |
| 0.6252690063424804 | 0.9016391829761250 | 0.3198018301956670 |
| 0.2991733311987116 | 0.2434080635764358 | 0.6520792468482057 |
| 0.9650427367443158 | 0.5742447637234080 | 0.4960018372560113 |
| 0.9410199010524930 | 0.0294594366134869 | 0.5125462630281198 |
| 0.9305274892068005 | 0.7885054103951700 | 0.4878717830706807 |
| 0.4749875637822579 | 0.3097007768205555 | 0.5085795625011396 |
| 0.1449499984672358 | 0.6452046897110514 | 0.3473503883067215 |
| 0.8007588399893263 | 0.9743725904266465 | 0.6769527728441196 |
| 0.5883700864458181 | 0.1190118744428568 | 0.3256594249141742 |
| 0.2590029949643581 | 0.4520643226584952 | 0.6628149839677406 |
| 0.7112305962888194 | 0.0413052838176298 | 0.4866161823259117 |
| 0.1907133521823467 | 0.0637253086903092 | 0.5047689490599683 |
| 0.8543118082545674 | 0.3995968165063502 | 0.3477113467418949 |
| 0.5162161473130574 | 0.7326828973644569 | 0.6803207842977479 |
| 0.3817666042307705 | 0.3690453512199995 | 0.3266132596323162 |
| 0.0454102911051029 | 0.7046939640930127 | 0.6666151286359823 |
| 0.4592748698824842 | 0.5721696886184695 | 0.4861130788124083 |
| 0.4361029200829735 | 0.0236692269484097 | 0.5058455271028051 |
| 0.1002263904896956 | 0.3549358625391161 | 0.3468007576428816 |
| 0.7694543489367901 | 0.7015645816912642 | 0.6786474851933415 |
| 0.1311020700674948 | 0.9112068547703001 | 0.3260183378436681 |
| 0.7946305785214048 | 0.2417860630498084 | 0.6674405465085202 |
| 0.7001854352559977 | 0.3004228103272867 | 0.5006487666935813 |
| 0.6988715632995451 | 0.7993946164866038 | 0.4989386645221326 |
| 0.1995194316071726 | 0.2986575372015726 | 0.4989677466477075 |
| 0.2014691772913833 | 0.7988375975821385 | 0.5006482040442128 |
| 0.8706358462599650 | 0.1283809026706650 | 0.3346773269838918 |
| 0.5233906478709085 | 0.4837327962336560 | 0.6642769692352557 |
| 0.3716076664751650 | 0.6418581510824901 | 0.3338410777345149 |
| 0.0290930854227982 | 0.9565659431759537 | 0.6651692935542139 |
| 0.3668949461569330 | 0.1330318707859055 | 0.3159889709291611 |
| 0.0321632992487529 | 0.4658124650494477 | 0.6857654478922677 |
| 0.8576300725157906 | 0.6297562709964892 | 0.3360651908963205 |
| 0.5474463809950872 | 0.9719320428466497 | 0.6671456823396489 |

### The perfect Cu<sub>7</sub>-O<sub>V6</sub> surface

O In Cu In

|                     |                     |                     |  |
|---------------------|---------------------|---------------------|--|
| 1.000000000000000   |                     |                     |  |
| 14.4442996979000000 | 0.0000000000000000  | 0.0000000000000000  |  |
| -7.2221498489000000 | 12.5091304781999995 | 0.0000000000000000  |  |
| 0.0000000000000000  | 0.0000000000000000  | 17.9855003356999994 |  |

|    |    |    |    |
|----|----|----|----|
| O  | In | Cu | In |
| 71 | 27 | 1  | 20 |

Direct

|                    |                    |                    |
|--------------------|--------------------|--------------------|
| 0.8433797059630973 | 0.6132783986454262 | 0.4539271393907727 |
| 0.5161448411673965 | 0.9532490515280085 | 0.2892221349588117 |
| 0.1712234054064916 | 0.2802769044681611 | 0.6190781419772307 |
| 0.7927126020174151 | 0.9607945702705813 | 0.3001583711523952 |
| 0.4631147919980025 | 0.2838011819509994 | 0.6580143285642506 |
| 0.1324713028997323 | 0.6248941284657911 | 0.4676554801709008 |
| 0.3012912926833439 | 0.7312946064868915 | 0.2993422743385464 |
| 0.9756988015636082 | 0.0683499691140033 | 0.6371518051701676 |
| 0.6404876905614750 | 0.4061549404665450 | 0.4641977496870719 |
| 0.5294434662242127 | 0.2098797817401136 | 0.2673209653018401 |
| 0.1835849326302297 | 0.5396266854151933 | 0.6083940117987792 |
| 0.8540213051318956 | 0.8780557566836618 | 0.4441537440882550 |
| 0.8860783793337657 | 0.1290897137692823 | 0.4575053000647147 |
| 0.5469819383924296 | 0.4633420598921169 | 0.2878078436513551 |
| 0.2184556698440983 | 0.7902929324911238 | 0.6187025807703257 |
| 0.5388562832089566 | 0.7321572193330040 | 0.2978171326524840 |
| 0.2046193874265066 | 0.0750827978976493 | 0.6556945401641421 |
| 0.8748448592346312 | 0.4078229782605652 | 0.4679132277364112 |
| 0.7679277870011104 | 0.4688148216347527 | 0.2981796400409816 |
| 0.4247959897069739 | 0.8113357788393956 | 0.6325642795426790 |
| 0.0937015242645881 | 0.1332771585234362 | 0.4650805558670869 |
| 0.2903612442713461 | 0.2200171070234353 | 0.2682656487178077 |
| 0.9572831425881753 | 0.5405519307486062 | 0.6111706820831733 |
| 0.6173677362888460 | 0.8750432294367478 | 0.4423242230623320 |
| 0.3710535048017510 | 0.6580422592336750 | 0.4572130825266067 |
| 0.0360359835650664 | 0.9839611298914044 | 0.2891811550347638 |
| 0.7048258063528627 | 0.3392667365393251 | 0.6212371722160486 |
| 0.7683677843455644 | 0.7068457202767299 | 0.2978287599562386 |
| 0.4226470136823525 | 0.0290528283349618 | 0.6576221792643611 |
| 0.0921585718096040 | 0.3658167324462649 | 0.4685304198510583 |
| 0.0302520993961194 | 0.1985301142460295 | 0.2994135009682382 |
| 0.6807916678950089 | 0.5380852138313531 | 0.6889695104210680 |
| 0.3667191136908984 | 0.8603072002536207 | 0.4632702623009796 |
| 0.2810671569967554 | 0.9706026321948386 | 0.2680851216931183 |
| 0.9567986662932266 | 0.3150255221176033 | 0.6112569770948517 |

|                    |                    |                    |
|--------------------|--------------------|--------------------|
| 0.6259563252624707 | 0.6445307090710191 | 0.4397423810615746 |
| 0.2265647975044501 | 0.3166856677585569 | 0.3781248486321901 |
| 0.8947593686844827 | 0.6474444126739369 | 0.7099845541188748 |
| 0.5589126367405378 | 0.9899934142942802 | 0.5432847624950755 |
| 0.2687983610732964 | 0.9758017426960129 | 0.5304806419689775 |
| 0.9278653629370061 | 0.3057933745280424 | 0.3455411931453009 |
| 0.7595735677227758 | 0.1981261245277272 | 0.5370510745521861 |
| 0.4239018748953879 | 0.5290518245790341 | 0.3661674505028230 |
| 0.0985444808116581 | 0.8657578765277583 | 0.6986505570489825 |
| 0.5453467066427482 | 0.7165992657874788 | 0.5606507342764026 |
| 0.2162747870024005 | 0.0601645282054868 | 0.3867041190192405 |
| 0.8716716383705837 | 0.3876574687295323 | 0.7305794198290165 |
| 0.1822554932761993 | 0.8095547892386133 | 0.3777747334479626 |
| 0.8530044790024615 | 0.1368400526504871 | 0.7107116704973224 |
| 0.5222621073360532 | 0.4725873206124835 | 0.5486245861439513 |
| 0.5261629431320781 | 0.1934465169343914 | 0.5308263998931992 |
| 0.1945073370211767 | 0.5217004070496783 | 0.3477155013292004 |
| 0.8601706163135178 | 0.8672810633292716 | 0.7032993995060798 |
| 0.3065925211184774 | 0.4626393321704291 | 0.5341449733172219 |
| 0.9716180270934095 | 0.7942426707696589 | 0.3637063600075350 |
| 0.6347870431655044 | 0.1349999470143665 | 0.6987244339040264 |
| 0.7790568972676526 | 0.7143725765918295 | 0.5617607208300819 |
| 0.4401459214398002 | 0.0577417469598787 | 0.3869956284499831 |
| 0.1131166422868763 | 0.3816520116393501 | 0.7283347774690453 |
| 0.6897785310973903 | 0.2736746764122991 | 0.3788757994886434 |
| 0.3703957960239075 | 0.6190624396613940 | 0.7034251205832881 |
| 0.0285723460986931 | 0.9405320057198283 | 0.5434956228768729 |
| 0.3080217527506873 | 0.2322041741363641 | 0.5303535073006259 |
| 0.9781058945268805 | 0.5712981745244700 | 0.3422505138029205 |
| 0.6279552242414598 | 0.8916359563786120 | 0.7003160608885446 |
| 0.0358642307398747 | 0.7394335420210566 | 0.5335607812982162 |
| 0.7060847231484104 | 0.0783631283402777 | 0.3652517311246391 |
| 0.3648038154287291 | 0.3971138293872882 | 0.7013636787333897 |
| 0.7746354740591722 | 0.9574018496685813 | 0.5588508169094382 |
| 0.4448150766407450 | 0.2849503484503416 | 0.3866408020085274 |
| 0.1217566018513977 | 0.6276955477025478 | 0.7285171698488857 |
| 0.1401509193421927 | 0.1455710036988030 | 0.3306643166722029 |
| 0.8123405852797486 | 0.4814143920593122 | 0.6814739686000388 |
| 0.5982882331502835 | 0.6237926578415423 | 0.3196311980751351 |
| 0.2560280302942617 | 0.9536717523553354 | 0.6524673052579976 |
| 0.9257593212920473 | 0.2911586746564869 | 0.4952409540392300 |
| 0.4705297544410296 | 0.8103065659324697 | 0.5146565327060608 |
| 0.3546947149183535 | 0.8943937604342437 | 0.3316363762090834 |
| 0.0192562857605353 | 0.2298467083393296 | 0.6750730342044876 |

|                    |                    |                    |
|--------------------|--------------------|--------------------|
| 0.8757659759949170 | 0.8747710826679296 | 0.3225688346810598 |
| 0.5447776168440125 | 0.1994813941815706 | 0.6526726645668027 |
| 0.2098323664607968 | 0.5341806199531672 | 0.4927118323558144 |
| 0.6883332440459677 | 0.5613906485803596 | 0.5026591450536056 |
| 0.6053008248587629 | 0.3595784460439081 | 0.3289880251758087 |
| 0.2713269272226710 | 0.6872002742732045 | 0.6725598212083874 |
| 0.6240859746911338 | 0.9011330343708502 | 0.3225999555064329 |
| 0.2927344999368815 | 0.2402785159968374 | 0.6522681665527381 |
| 0.9656800154122649 | 0.5735503714607344 | 0.4955806136455437 |
| 0.9405926820206612 | 0.0295224018466829 | 0.5137213994620198 |
| 0.9315626862283685 | 0.7882805502553950 | 0.4860782931338414 |
| 0.4738338011934194 | 0.3078199321051196 | 0.5021045889659290 |
| 0.1450603914610761 | 0.6453592038799706 | 0.3459642700144338 |
| 0.7962317157314773 | 0.9750843563377376 | 0.6787331432305882 |
| 0.5883279195954048 | 0.1194164820254365 | 0.3246259251748353 |
| 0.2624982775631726 | 0.4572836286194412 | 0.6637371628427153 |
| 0.7103959606381446 | 0.0426859555777498 | 0.4875381654362997 |
| 0.1903704942321492 | 0.0635965430795569 | 0.5024259223039994 |
| 0.8541694551789962 | 0.3992162869996956 | 0.3460141828234453 |
| 0.5095444252497104 | 0.7417164086911620 | 0.6803700419243218 |
| 0.3810372177293521 | 0.3702145793030639 | 0.3245745580254827 |
| 0.0515831283255910 | 0.7047602181626120 | 0.6637315648427663 |
| 0.4607017178753074 | 0.5725066654810289 | 0.4909594648923047 |
| 0.4361204305048678 | 0.0259119789728218 | 0.5023574562976202 |
| 0.0999884627017215 | 0.3545228742166820 | 0.3465879782491431 |
| 0.7935604768097220 | 0.7050568906755528 | 0.6808645893788914 |
| 0.1309756871406011 | 0.9120251138708226 | 0.3236667368536640 |
| 0.7961300429875477 | 0.2405029820256527 | 0.6669222707452528 |
| 0.7010721106809469 | 0.3027152972209208 | 0.5001561552541234 |
| 0.6975726348923632 | 0.7996569039271600 | 0.5030502156603844 |
| 0.1992585761551691 | 0.2985282166340242 | 0.4985019365878435 |
| 0.2019274077944516 | 0.8001911494187249 | 0.4980891534729302 |
| 0.8699156823768153 | 0.1280993381847875 | 0.3356445884152002 |
| 0.5205923703291365 | 0.4515594323953044 | 0.6685533064207345 |
| 0.3727224726104884 | 0.6422811907291249 | 0.3361415854123339 |
| 0.0305770830485685 | 0.9588046616070669 | 0.6648599861005136 |
| 0.3666830642057016 | 0.1334231738211349 | 0.3113969546545840 |
| 0.0347143141654353 | 0.4658232939100231 | 0.6842497702256368 |
| 0.8599489652141735 | 0.6302393245593410 | 0.3320550374785062 |
| 0.5424103670677088 | 0.9720747764264906 | 0.6649383426191293 |

### The perfect Cu<sub>7</sub>-O<sub>v6</sub>-bt-CO<sub>2</sub> surface

O In Cu In C O

|                      |                     |                    |    |   |   |
|----------------------|---------------------|--------------------|----|---|---|
| 1.000000000000000    |                     |                    |    |   |   |
| 14.4443000000000001  | 0.000000000000000   | 0.000000000000000  |    |   |   |
| -7.22214999999999965 | 12.5091307398835685 | 0.000000000000000  |    |   |   |
| 0.00000000000000011  | 0.00000000000000019 | 17.985499999999983 |    |   |   |
| O                    | In                  | Cu                 | In | C | O |
| 71                   | 27                  | 1                  | 20 | 1 | 2 |

Direct

|                    |                    |                    |
|--------------------|--------------------|--------------------|
| 0.8416822988820093 | 0.6124695341441280 | 0.4563736302175781 |
| 0.5153178472823495 | 0.9519124112986005 | 0.2892817540977769 |
| 0.1730160365760656 | 0.2812112293820013 | 0.6205864654772490 |
| 0.7928734735154740 | 0.9606229137855492 | 0.2983871185349438 |
| 0.4675632425757070 | 0.2874387594807195 | 0.6593603285090900 |
| 0.1318544236098676 | 0.6243134608287665 | 0.4686144548952110 |
| 0.3009214965069697 | 0.7311316104871727 | 0.2998072017693164 |
| 0.9761016664181419 | 0.0693889848851530 | 0.6365447380935383 |
| 0.6404362812354540 | 0.4051304169640280 | 0.4659518859886219 |
| 0.5287628352847997 | 0.2087269880577669 | 0.2684067229785905 |
| 0.1832692563005587 | 0.5399475375599017 | 0.6102723091462326 |
| 0.8547246171865415 | 0.8805551152626991 | 0.4425883982847455 |
| 0.8864548426429445 | 0.1283473598007543 | 0.4564368275844003 |
| 0.5469957418768193 | 0.4625855091141166 | 0.2885152299081382 |
| 0.2172887119409996 | 0.7902779705188019 | 0.6205791361016255 |
| 0.5392007082016355 | 0.7312562410315280 | 0.2987508824105118 |
| 0.2050151506774684 | 0.0764582788033035 | 0.6544083075321891 |
| 0.8743208767143076 | 0.4073910185227105 | 0.4686639096657088 |
| 0.7679460506029686 | 0.4686733996599614 | 0.2992461253541031 |
| 0.4273095698996284 | 0.8077825725505695 | 0.6376923834900922 |
| 0.0942934005534240 | 0.1343814569266443 | 0.4658878236394678 |
| 0.2897571023058061 | 0.2189002371982204 | 0.2693457734439577 |
| 0.9583800274078252 | 0.5424677256469136 | 0.6108039600358875 |
| 0.6176170779640323 | 0.8755894131695438 | 0.4413180620595347 |
| 0.3688330579129115 | 0.6573223579326696 | 0.4566372867033558 |
| 0.0364830024388536 | 0.9837978460900589 | 0.2902743312634203 |
| 0.7077389041371464 | 0.3291576501312456 | 0.6205506106314459 |
| 0.7684130058587578 | 0.7066836147555121 | 0.2977353505358684 |
| 0.4214772933496664 | 0.0279631994420729 | 0.6553760593237474 |
| 0.0921627125578483 | 0.3662000618987614 | 0.4689366315407391 |
| 0.0308506831414396 | 0.1986144062781285 | 0.2997432597851542 |
| 0.6919077706164027 | 0.5276693526086103 | 0.6417957625641140 |
| 0.3655169968495454 | 0.8580805752861113 | 0.4665857789304980 |
| 0.2805443308831904 | 0.9698520513494809 | 0.2694704026672102 |
| 0.9559266634477397 | 0.3144820132054791 | 0.6108155839497386 |



|                    |                    |                    |
|--------------------|--------------------|--------------------|
| 0.6279295614400960 | 0.6415856795055747 | 0.4414284248948294 |
| 0.2271023172760759 | 0.3170298610740412 | 0.3789320037035941 |
| 0.8876220306395788 | 0.6444135363585043 | 0.7124230520563390 |
| 0.5581691845846189 | 0.9876152601510543 | 0.5441480594184299 |
| 0.2671113536642428 | 0.9744424162213660 | 0.5307447685860105 |
| 0.9280610318470504 | 0.3057472635753875 | 0.3462206767270783 |
| 0.7590085320014484 | 0.1951361546208760 | 0.5345471706992069 |
| 0.4236379924412041 | 0.5287675456068116 | 0.3659845418245099 |
| 0.0975152196776623 | 0.8665770336818388 | 0.6994653570786546 |
| 0.5438262307577663 | 0.7164350949946160 | 0.5574252088696062 |
| 0.2160563394350996 | 0.0595618466561444 | 0.3882499775643437 |
| 0.8711106277282655 | 0.3879501525236994 | 0.7296892557768091 |
| 0.1824106684665220 | 0.8090000319329637 | 0.3789881276766313 |
| 0.8516559963224809 | 0.1355772297823129 | 0.7096621476535183 |
| 0.5132931770807382 | 0.4686685585560559 | 0.5444428437012755 |
| 0.5242520850287995 | 0.1917313566587203 | 0.5307572878056737 |
| 0.1937914550646301 | 0.5213202889263763 | 0.3459444323401649 |
| 0.8600534540736806 | 0.8669749590538108 | 0.7025990220461757 |
| 0.3052986991604189 | 0.4637091748146965 | 0.5348166205230980 |
| 0.9710191126395407 | 0.7933664721842182 | 0.3646208666293756 |
| 0.6329301664076236 | 0.1327386784346423 | 0.7003152749020277 |
| 0.7830137494631977 | 0.7240543112779103 | 0.5599404571960589 |
| 0.4400505341036396 | 0.0555129212909101 | 0.3881842107792870 |
| 0.1122531381052158 | 0.3811368535201265 | 0.7285426713871100 |
| 0.6897308238968746 | 0.2727418583350034 | 0.3785019538798801 |
| 0.3648348658047253 | 0.6187650156118755 | 0.7076055628292143 |
| 0.0283195284229517 | 0.9411002862194808 | 0.5436326904001986 |
| 0.3083866147962193 | 0.2322156383283476 | 0.5309621146012572 |
| 0.9776768797712699 | 0.5715164959656120 | 0.3447520806834385 |
| 0.6274447028790739 | 0.8922218952587216 | 0.7014280722970637 |
| 0.0351599244085179 | 0.7400350494309338 | 0.5344650368967273 |
| 0.7064936274630154 | 0.0778916432498405 | 0.3637017025185446 |
| 0.3699935133908852 | 0.4014188299504179 | 0.6998217182292451 |
| 0.7740743368692071 | 0.9570290669224866 | 0.5587536581593545 |
| 0.4444319067566159 | 0.2837327771935394 | 0.3865343995777177 |
| 0.1180828819969485 | 0.6274113221984254 | 0.7296947483821974 |
| 0.1401589138731506 | 0.1452871590561965 | 0.3322828616436371 |
| 0.8120861698122656 | 0.4793257357200539 | 0.6755274281341301 |
| 0.5990507175532698 | 0.6228659913823444 | 0.3219881052685695 |
| 0.2545601564429365 | 0.9538050039991995 | 0.6524677227332722 |
| 0.9251765962406160 | 0.2902039031624793 | 0.4946525947133111 |
| 0.4706389580139884 | 0.8085033798337123 | 0.5162534892594237 |
| 0.3543919062816489 | 0.8935662294207114 | 0.3326109601994640 |
| 0.0187578290326979 | 0.2297575635983039 | 0.6746137978562775 |

|                    |                    |                    |
|--------------------|--------------------|--------------------|
| 0.8757070853358426 | 0.8747154218740517 | 0.3221821188315844 |
| 0.5448446611346073 | 0.1988179584905254 | 0.6524547372421251 |
| 0.2092381736233498 | 0.5342777272189957 | 0.4943739743218576 |
| 0.6886984518954868 | 0.5587061032332712 | 0.5123424439317912 |
| 0.6053072764757956 | 0.3590952151075497 | 0.3301241088639836 |
| 0.2680060757320440 | 0.6874731275669153 | 0.6743083753397809 |
| 0.6243456945625370 | 0.9006078017516999 | 0.3217869049354929 |
| 0.2968019992512607 | 0.2429244134793064 | 0.6527546986765645 |
| 0.9648928369235306 | 0.5741293774655379 | 0.4949808205135782 |
| 0.9401412390777378 | 0.0294143114389596 | 0.5133695448701606 |
| 0.9303467021224174 | 0.7888401530823185 | 0.4865590062576105 |
| 0.4736369264738037 | 0.3075210275785769 | 0.5015337901395590 |
| 0.1448706487818550 | 0.6447884015131291 | 0.3469177180828067 |
| 0.7962845020426282 | 0.9736438210373589 | 0.6785708073056461 |
| 0.5878322497142128 | 0.1181044429892624 | 0.3247228906152003 |
| 0.2626684342776150 | 0.4569198730751771 | 0.6646033163911657 |
| 0.7099554386898819 | 0.0408006459425065 | 0.4867991370713429 |
| 0.1901176814972651 | 0.0640846404374577 | 0.5040715146008042 |
| 0.8543239377255631 | 0.3991678353790379 | 0.3469504858621431 |
| 0.5044859676731531 | 0.7437995421591209 | 0.6924693395212214 |
| 0.3810481723434222 | 0.3696447447533390 | 0.3247789510826946 |
| 0.0473200566586292 | 0.7046377761194533 | 0.6660007865948674 |
| 0.4603005760938930 | 0.5723251216897659 | 0.4896924035358952 |
| 0.4349526423715763 | 0.0240235108424852 | 0.5039786917046317 |
| 0.1003169521317369 | 0.3544810237086253 | 0.3471108775724626 |
| 0.7876338677344170 | 0.7021284197517492 | 0.6778548963822174 |
| 0.1306582208144280 | 0.9114108116585643 | 0.3252661688527106 |
| 0.7945115755721276 | 0.2392078130624639 | 0.6662946293789895 |
| 0.6996322512180276 | 0.2998568174796824 | 0.4994273294645479 |
| 0.6970869169904315 | 0.7987023390055188 | 0.5018029756856391 |
| 0.2000160822591369 | 0.2993932809332411 | 0.4996028611881728 |
| 0.2005274795422592 | 0.7992725100193085 | 0.4995376650890137 |
| 0.8701707936437527 | 0.1275631518219918 | 0.3350547914248771 |
| 0.5262173313746346 | 0.4587976738537539 | 0.6636313142652701 |
| 0.3724154495504830 | 0.6419729766427660 | 0.3361433207062334 |
| 0.0286834529371061 | 0.9584842334338799 | 0.6648437300329865 |
| 0.3663050944173862 | 0.1324345034268674 | 0.3128209811470909 |
| 0.0336969353735724 | 0.4653391522295436 | 0.6850987156936607 |
| 0.8577103863694767 | 0.6293498758055518 | 0.3347559417815838 |
| 0.5418275732572601 | 0.9719180733570136 | 0.6653999778139875 |
| 0.5702898943993182 | 0.6838178465335119 | 0.7564369987323978 |
| 0.5679522679367488 | 0.6973695431417641 | 0.8221481026770554 |
| 0.6111893755277664 | 0.6373061596103590 | 0.7167645106020524 |

**The perfect Cu<sub>7</sub>-O<sub>v6</sub>-[CO<sub>2</sub>+H]\* surface**

O In Cu In C O H

1.000000000000000  
 14.4443000000000001 0.0000000000000000 0.0000000000000000  
 -7.2221499999999965 12.5091307398835685 0.0000000000000000  
 0.00000000000000011 0.00000000000000019 17.985499999999983

O In Cu In C O H  
 71 27 1 20 1 2 1

Direct

0.8422812349806891 0.6144361154855315 0.4552854506768138  
 0.5157760098459261 0.9521981083351453 0.2875368627984239  
 0.1724279036559723 0.2800727190547205 0.6210309493171331  
 0.7927978293619423 0.9606851223529828 0.2978854648149061  
 0.4684495363379179 0.2876529544333585 0.6606023968874832  
 0.1318175709928711 0.6246621872924027 0.4693285201923580  
 0.3007369870741231 0.7302884695811561 0.2992466620242246  
 0.9751419633858113 0.0685225750359205 0.6364193076722047  
 0.6409680439464507 0.4048864771231428 0.4666423682478133  
 0.5291554159880647 0.2091980353914116 0.2672527767274153  
 0.1812514589652083 0.5391431756426103 0.6099967848314241  
 0.8550689747260607 0.8803133301826794 0.4421527940630772  
 0.8861894098777310 0.1275602615457487 0.4563061343895943  
 0.5469930290675716 0.4626899080632714 0.2880122642695496  
 0.2210221635864558 0.7917405716669188 0.6185751659188712  
 0.5390328625588349 0.7310752163622468 0.2984036867438307  
 0.2050086645458960 0.0753690024559119 0.6591113785251428  
 0.8733970875968644 0.4070476090843732 0.4697898914124122  
 0.7683670871570861 0.4685048447226322 0.2988195758094717  
 0.4277758621525973 0.8068023682954136 0.6375122653100272  
 0.0947057529639545 0.1340759546321847 0.4655561367283439  
 0.2902918896107005 0.2196174462534448 0.2687219071476284  
 0.9493809165165201 0.5480556870487335 0.6114370941700460  
 0.6173765805283721 0.8753103922484964 0.4406772937426767  
 0.3691240290641873 0.6571521241884075 0.4572161857813976  
 0.0367284126912014 0.9842399109334330 0.2890427887504908  
 0.7048726050687173 0.3252844451332912 0.6198895621676137  
 0.7684272156924395 0.7070475503995426 0.2970433569524973  
 0.4211669320489819 0.0266952201559917 0.6588534479112194  
 0.0924595248600222 0.3653233383634051 0.4698001223401220  
 0.0309270619516506 0.1991597476956649 0.2993459215888984  
 0.6978728230767711 0.5309369574825427 0.6475343663553479  
 0.3670980571038523 0.8586256515355677 0.4648503691810828  
 0.2807598989756482 0.9700487876159539 0.2676906459514532  
 0.9552624048874839 0.3158099539092972 0.6110373082669653

|                    |                    |                    |
|--------------------|--------------------|--------------------|
| 0.6283543587856327 | 0.6415948640415909 | 0.4409915701235795 |
| 0.2273925197658391 | 0.3166754998004946 | 0.3792506914443516 |
| 0.8880424726035645 | 0.6509314207373207 | 0.7240946928509652 |
| 0.5578869941896606 | 0.9873765183863653 | 0.5443137434200077 |
| 0.2685174912146234 | 0.9754826098325786 | 0.5308140961942670 |
| 0.9280731569192991 | 0.3055417319792582 | 0.3486586911190415 |
| 0.7592030198360751 | 0.1943022183023942 | 0.5346673957099162 |
| 0.4240866390530666 | 0.5287089608800074 | 0.3668181804022537 |
| 0.0951029457397471 | 0.8624955201975276 | 0.6976206230298332 |
| 0.5450636502051486 | 0.7165904675568169 | 0.5573989477371295 |
| 0.2165038304588382 | 0.0595375783691972 | 0.3867685644235282 |
| 0.8703171235118747 | 0.3883933356883519 | 0.7297621074044105 |
| 0.1829764373530252 | 0.8093311291372441 | 0.3776623353520049 |
| 0.8523212432380891 | 0.1361574000505822 | 0.7099692997503748 |
| 0.5171320394461080 | 0.4704585230323017 | 0.5467439098502787 |
| 0.5230920849540476 | 0.1904844134526685 | 0.5309990799806806 |
| 0.1940249136023118 | 0.5212628418584855 | 0.3481644736900688 |
| 0.8601340342154601 | 0.8668575080471814 | 0.7045126656845464 |
| 0.3056899952032353 | 0.4634731124643263 | 0.5357387418895949 |
| 0.9717600252353932 | 0.7938234711663932 | 0.3634394228445657 |
| 0.6330512726233933 | 0.1318965941072712 | 0.7008451043222371 |
| 0.7832862116705913 | 0.7230025915456979 | 0.5602643184266695 |
| 0.4400619434658547 | 0.0555157629765710 | 0.3863981252627321 |
| 0.1115805999998288 | 0.3813793638545502 | 0.7286971155108360 |
| 0.6891711314712311 | 0.2724543142389377 | 0.3781401521219008 |
| 0.3634826554010717 | 0.6178973987763636 | 0.7074423487271652 |
| 0.0294531575399624 | 0.9413239379736860 | 0.5434595883989841 |
| 0.3085637828809543 | 0.2312762575837160 | 0.5321166132268890 |
| 0.9773856157071813 | 0.5714248346772597 | 0.3473761381836181 |
| 0.6272718917763018 | 0.8913947075010868 | 0.7014984327515903 |
| 0.0370806849038672 | 0.7412164457497463 | 0.5331099529475142 |
| 0.7061359131607232 | 0.0777501607442766 | 0.3635222725353665 |
| 0.3692021935092523 | 0.4005506182417825 | 0.7004125231476828 |
| 0.7739699406108450 | 0.9561710897898448 | 0.5586532430536340 |
| 0.4449882462741679 | 0.2840130078388716 | 0.3865911027366420 |
| 0.1155777913153670 | 0.6279757178868148 | 0.7271354467385486 |
| 0.1403956119535417 | 0.1456195750113005 | 0.3311015397500920 |
| 0.8056197270217460 | 0.4719965684348463 | 0.6753618014639408 |
| 0.5989726423260626 | 0.6229374080847656 | 0.3213813793349886 |
| 0.2552718737090211 | 0.9545643484465571 | 0.6526653892850056 |
| 0.9251556333161730 | 0.2898150868131243 | 0.4940019524828036 |
| 0.4712183476760732 | 0.8084439713589012 | 0.5159957794720943 |
| 0.3547539033939685 | 0.8935772361213535 | 0.3302306032375085 |
| 0.0187611575133058 | 0.2298366105885455 | 0.6745712543493503 |

|                    |                    |                    |
|--------------------|--------------------|--------------------|
| 0.8759982155762691 | 0.8751813281563205 | 0.3210763303564182 |
| 0.5427675144785213 | 0.1961807506412581 | 0.6531710141367021 |
| 0.2092391023102137 | 0.5337962589027202 | 0.4938764355759522 |
| 0.6895525684191575 | 0.5591625723653675 | 0.5105576618530389 |
| 0.6051708286503132 | 0.3590610818346707 | 0.3290314310383599 |
| 0.2681545605499702 | 0.6867729419579606 | 0.6734360804271147 |
| 0.6242190618502099 | 0.9005734270956600 | 0.3209026334645737 |
| 0.2966476833978633 | 0.2419849356863032 | 0.6540811184045849 |
| 0.9639737155378837 | 0.5743586052544316 | 0.4924743542800856 |
| 0.9404406528150289 | 0.0294231866513895 | 0.5130467946683684 |
| 0.9315893198285131 | 0.7900900043957010 | 0.4852365939090100 |
| 0.4739222843945533 | 0.3075499266846372 | 0.5018095156604168 |
| 0.1451152035299499 | 0.6446101733429571 | 0.3470258878829898 |
| 0.7961521793302078 | 0.9742436416519710 | 0.6784567190620058 |
| 0.5881501608262827 | 0.1181849976022617 | 0.3233077975895670 |
| 0.2620753083525199 | 0.4558314205589784 | 0.6646520790871872 |
| 0.7097370234160328 | 0.0401413165120834 | 0.4864815433221729 |
| 0.1908982963920645 | 0.0640235442957784 | 0.5022012546403102 |
| 0.8538266457346688 | 0.3986120753640215 | 0.3474029746996002 |
| 0.5034913341622683 | 0.7433554552437496 | 0.6930681878145765 |
| 0.3812445459833949 | 0.3698560742942228 | 0.3248411919167647 |
| 0.0528740145111321 | 0.7071313989592412 | 0.6582767747682143 |
| 0.4607466465728702 | 0.5721182029001081 | 0.4904709811591460 |
| 0.4358660407318730 | 0.0241380406344839 | 0.5018827260884600 |
| 0.1006581518621068 | 0.3541657338550639 | 0.3477586711068280 |
| 0.7783520956886657 | 0.7041305443684555 | 0.6774968497128271 |
| 0.1309600869981198 | 0.9116415382431904 | 0.3234597213757678 |
| 0.7934347469263542 | 0.2369289077625046 | 0.6653777108486493 |
| 0.6983463848040572 | 0.2976754497338610 | 0.4988716592386221 |
| 0.6971359929658194 | 0.7988680767704980 | 0.5005881033508168 |
| 0.2002852438372893 | 0.2988355032696212 | 0.5000498612100026 |
| 0.2029184544598346 | 0.8007145348072194 | 0.4974401971703314 |
| 0.8700558843402948 | 0.1272590193900796 | 0.3348721844538302 |
| 0.5266485449027688 | 0.4581885731381941 | 0.6656756346598190 |
| 0.3728642314797366 | 0.6419683538191253 | 0.3365118675891383 |
| 0.0293237630390773 | 0.9589268371701481 | 0.6645095295835095 |
| 0.3666297024300123 | 0.1327456860361903 | 0.3114207323818087 |
| 0.0330558491970450 | 0.4648295391492698 | 0.6852402145897712 |
| 0.8576188206130460 | 0.6297960369811638 | 0.3333201089032828 |
| 0.5414520642658135 | 0.9711473803331354 | 0.6657604040514788 |
| 0.5664864791677662 | 0.6825327787387030 | 0.7574301794620938 |
| 0.5651780069111055 | 0.6944455268576893 | 0.8234340373699003 |
| 0.6076905229618164 | 0.6343043005205827 | 0.7181593780730895 |
| 0.9088605291423905 | 0.6707905335762774 | 0.7755610121911470 |

### The perfect Cu<sub>7</sub>-O<sub>v6</sub>-[COOH]\* surface

O In Cu In C O H

1.000000000000000

14.4443000000000001 0.000000000000000 0.000000000000000

-7.2221499999999965 12.5091307398835685 0.000000000000000

0.00000000000000011 0.00000000000000019 17.985499999999983

O In Cu In C O H

71 27 1 20 1 2 1

Direct

0.8421064932575490 0.6124961697654913 0.4553590473351025

0.5158123223918182 0.9518427569281624 0.2879725403659750

0.1725410958911205 0.2802437102589132 0.6194187870032420

0.7928924046183907 0.9604463365235110 0.2975564655493380

0.4640039908855652 0.2838199037318523 0.6629338550745416

0.1324338591362837 0.6243419011739252 0.4677379158118117

0.3013267548083794 0.7307014614642021 0.2989012312796315

0.9758629324468274 0.0689241609668360 0.6358374862033638

0.6406513653933243 0.4055467558472082 0.4646775715760420

0.5290940976716949 0.2078949917306441 0.2661160088204571

0.1836433677446641 0.5398346801790325 0.6088220781303223

0.8552401204807172 0.8802625801329934 0.4416042590181345

0.8861475797617200 0.1280321369877590 0.4559952414159955

0.5470719003538942 0.4624698524465191 0.2863537312831148

0.2193129747306970 0.7904419822171636 0.6195233630058795

0.5395796050549926 0.7310850135419410 0.2978355643885825

0.2047483910644309 0.0751639946279280 0.6557527097972170

0.8742175271486941 0.4069412292594131 0.4675662572513625

0.7686434505141623 0.4684986765737424 0.2974455538656613

0.4298993175824957 0.8069491002886066 0.6382468240682636

0.0944942122342327 0.1337400380751706 0.4646047480385627

0.2897101494349957 0.2186376190457449 0.2670705249983434

0.9574911463124343 0.5419044759071531 0.6097399974377997

0.6178243785625627 0.8751516872016628 0.4407170320716654

0.3702308921044746 0.6571682335559833 0.4561359121657501

0.0366826854494304 0.9832211354215278 0.2885622295611798

0.7059662246544717 0.3328021397389871 0.6193061027914009

0.7687119776645147 0.7064307521964990 0.2969301793326795

0.4219381236734965 0.0275422151490483 0.6546835045145906

0.0925413095253199 0.3653804750155307 0.4681336148140028

0.0308734099273606 0.1982445193254924 0.2988050306830067

0.6877136623550819 0.5338830180417269 0.6491563758546093

0.3665843733053567 0.8577214618978479 0.4664645739338006

0.2807393633762069 0.9692831784572303 0.2674392419330052

0.9563336132273307 0.3146346962464255 0.6097717196599705

|                    |                    |                    |
|--------------------|--------------------|--------------------|
| 0.6278914155034299 | 0.6414140379146983 | 0.4403838537650991 |
| 0.2275667913693401 | 0.3163380005414326 | 0.3776976549215726 |
| 0.8888273302663655 | 0.6440239134680048 | 0.7121243762539438 |
| 0.5584066208633525 | 0.9873884460150173 | 0.5436266281793508 |
| 0.2674636568299066 | 0.9742749072396696 | 0.5299880931068529 |
| 0.9282145018060333 | 0.3052317054391331 | 0.3459808036009295 |
| 0.7587296293662208 | 0.1957245220266065 | 0.5346282993693025 |
| 0.4240682658076369 | 0.5282135306790343 | 0.3650435902515489 |
| 0.0971539130532949 | 0.8650052042080469 | 0.6979579029271675 |
| 0.5453099810454787 | 0.7154354362160591 | 0.5577562995349677 |
| 0.2166254570435932 | 0.0595022151844358 | 0.3862691291318726 |
| 0.8706170148901443 | 0.3874805236895534 | 0.7286302012797206 |
| 0.1835788704752624 | 0.8093694987493503 | 0.3778733935264668 |
| 0.8518706124208154 | 0.1362678737259858 | 0.7089182330438529 |
| 0.5136056834349055 | 0.4668328320209981 | 0.5434257227889264 |
| 0.5240460795145151 | 0.1918908539867969 | 0.5299092673035392 |
| 0.1944644703784822 | 0.5211575681276052 | 0.3465096455336912 |
| 0.8601772758400338 | 0.8674463810882154 | 0.7032460525052976 |
| 0.3055971426296799 | 0.4630612273793808 | 0.5340976868646982 |
| 0.9717798664914663 | 0.7931719447682666 | 0.3634159833644227 |
| 0.6338160356965900 | 0.1352716470527318 | 0.6995724537465735 |
| 0.7839243372529329 | 0.7232634584909770 | 0.5588937111245573 |
| 0.4399745512487550 | 0.0551068606565742 | 0.3867622823190165 |
| 0.1124231321960917 | 0.3812866777346970 | 0.7274198187472785 |
| 0.6894054370964446 | 0.2727992450419122 | 0.3772576379754574 |
| 0.3646847205453179 | 0.6197682183147222 | 0.7063022517393142 |
| 0.0288339085194282 | 0.9409455410027492 | 0.5429160280244670 |
| 0.3086653151279978 | 0.2310792540050698 | 0.5303897023709609 |
| 0.9780011563752994 | 0.5712218853087855 | 0.3443228893144634 |
| 0.6276563794885642 | 0.8950321056888356 | 0.7009746692006480 |
| 0.0361105024070615 | 0.7397386054989769 | 0.5336460272728041 |
| 0.7062933170452576 | 0.0775337449393287 | 0.3635310111654793 |
| 0.3683316847295598 | 0.4012060543138198 | 0.6994833969697877 |
| 0.7740979058802036 | 0.9564105098613629 | 0.5580889799989044 |
| 0.4448674395877430 | 0.2832043484592487 | 0.3835913224790223 |
| 0.1175834049073902 | 0.6266111877144034 | 0.7284886999143922 |
| 0.1403374187334907 | 0.1448272325510928 | 0.3303367938734542 |
| 0.8117785319440558 | 0.4796118850428157 | 0.6756147385752564 |
| 0.5992491265121563 | 0.6225423400745753 | 0.3206048804822196 |
| 0.2547911493963720 | 0.9534281490321919 | 0.6518254031729454 |
| 0.9253721081884280 | 0.2901101313211548 | 0.4935180973392037 |
| 0.4721278722562446 | 0.8081007457537435 | 0.5154335097959070 |
| 0.3548345555011769 | 0.8934396156259861 | 0.3307888485397283 |
| 0.0187658596125707 | 0.2296582415735885 | 0.6739066439191489 |

|                    |                    |                    |
|--------------------|--------------------|--------------------|
| 0.8760144257478794 | 0.8746115100625168 | 0.3208640153153402 |
| 0.5444207788634068 | 0.1993995793642276 | 0.6517132537818781 |
| 0.2096019468266275 | 0.5337935997859526 | 0.4925801198152288 |
| 0.6885087631373752 | 0.5589712823459148 | 0.5104177800501690 |
| 0.6056478352815863 | 0.3587582739197625 | 0.3268431300728925 |
| 0.2671014060116056 | 0.6868111043606107 | 0.6731580234817314 |
| 0.6244813279725832 | 0.9003535853907263 | 0.3208864467624639 |
| 0.2946492016336839 | 0.2409208723088717 | 0.6524967940112950 |
| 0.9651837193279424 | 0.5737020374805535 | 0.4936100276419332 |
| 0.9405167771140565 | 0.0291626393470011 | 0.5123193743847855 |
| 0.9318314316084815 | 0.7890504140349633 | 0.4850937273161417 |
| 0.4730624819446121 | 0.3063156985832712 | 0.4981036175529984 |
| 0.1453091529059871 | 0.6447226090102250 | 0.3459946803355068 |
| 0.7975540859163531 | 0.9751021542515144 | 0.6774288233563284 |
| 0.5881252520600257 | 0.1179194338903466 | 0.3236102899785704 |
| 0.2615691179691312 | 0.4560655489939527 | 0.6627128925028976 |
| 0.7102419532994728 | 0.0410360538342336 | 0.4862915400194262 |
| 0.1902775305777869 | 0.0632427108160733 | 0.5019546427701949 |
| 0.8544411378608732 | 0.3987064239683980 | 0.3458072107604191 |
| 0.5037956691742558 | 0.7476325235081348 | 0.6952050923404884 |
| 0.3809826995245720 | 0.3694138166068046 | 0.3226004893188401 |
| 0.0479430300556823 | 0.7040010971693946 | 0.6642660010348382 |
| 0.4606091763412509 | 0.5717778875747049 | 0.4889544289834774 |
| 0.4352811625493815 | 0.0239115338208033 | 0.5025751492668975 |
| 0.1006505143255637 | 0.3539764750835834 | 0.3463054203145419 |
| 0.7930694799944054 | 0.7053742000207429 | 0.6762409894239241 |
| 0.1310552843857153 | 0.9109992482336314 | 0.3235797892833706 |
| 0.7948763695859542 | 0.2397439880265676 | 0.6649936988347129 |
| 0.6998615677013605 | 0.3005372347851334 | 0.4983093935242873 |
| 0.6977064452759191 | 0.7986518256226320 | 0.5005547820814273 |
| 0.2003083732713060 | 0.2986312444068212 | 0.4983544755112955 |
| 0.2014399873779431 | 0.7991582776312298 | 0.4983424106184232 |
| 0.8701292475644404 | 0.1271801668714017 | 0.3343084876735014 |
| 0.5220668521499533 | 0.4524797097232227 | 0.6622884123769995 |
| 0.3730727035730805 | 0.6417919290439095 | 0.3353666908566099 |
| 0.0299330126608587 | 0.9591208772220831 | 0.6642327932191935 |
| 0.3663878267557331 | 0.1319864045871178 | 0.3099961193329863 |
| 0.0331958854754187 | 0.4647755452684243 | 0.6839241129038954 |
| 0.8581556659079379 | 0.6291047089268327 | 0.3334904441641180 |
| 0.5425922658269609 | 0.9745573320081479 | 0.6644376077181507 |
| 0.5580172304787943 | 0.7002732881644570 | 0.7747977801455500 |
| 0.5492745380588780 | 0.7146627477178567 | 0.8393056527483893 |
| 0.6113883980433481 | 0.6407785167214098 | 0.7552928977799985 |
| 0.6266944941800913 | 0.6197553894102217 | 0.8037353534507505 |



**The perfect Cu<sub>7</sub>-O<sub>v6</sub>-[TS-COOH]\* surface**

O In Cu In C O H

1.000000000000000

14.4443000000000001 0.000000000000000 0.000000000000000

-7.2221500000000001 12.5091307398836005 0.000000000000000

0.00000000000000011 0.0000000000000019 17.9855000000000018

O In Cu In C O H

71 27 1 20 1 2 1

Direct

0.8451813923663164 0.6127004919854102 0.4526059875410088

0.5175219854329902 0.9524090830182483 0.2877632514716657

0.1719600801476255 0.2789379588078289 0.6181492170148863

0.7942366697525770 0.9604544771907862 0.2977654418944655

0.4654670107194714 0.2854288944821983 0.6591441584068702

0.1338068955325068 0.6243797443012699 0.4671195844553812

0.3029953355131577 0.7308063485812308 0.2988087076799691

0.9762640348062726 0.0676004302263798 0.6362245739986484

0.6417708391062766 0.4055705630458157 0.4630738266278497

0.5306054454624962 0.2085638943257497 0.2664599546006153

0.1860147814407938 0.5394677190244739 0.6076234556078427

0.8561951671898660 0.8791232929211126 0.4418685981531896

0.8870389855932015 0.1277226620282087 0.4562750052143182

0.5484898420286255 0.4625304681365489 0.2865408064032347

0.2216002128405248 0.7912124603503261 0.6182583994211887

0.5407689261053930 0.7314393166075098 0.2969924636923282

0.2068133716984545 0.0757726211128830 0.6574899808363558

0.8756114973096742 0.4070484290937845 0.4668669863845241

0.7696001847651798 0.4679917682895102 0.2966605611630199

0.4309101952838850 0.8080735189484134 0.6364473652414637

0.0950035396879416 0.1327793340874371 0.4637311842880611

0.2918997956693671 0.2193196835478624 0.2669929596153732

0.9583488037375461 0.5404901551985920 0.6095969162664043

0.6193377578453177 0.8755378772283158 0.4405712297994923

0.3722726782354059 0.6574711641971711 0.4562125047309773

0.0378837394069838 0.9835570905086224 0.2876187017808647

0.7067614884996684 0.3367664956654193 0.6193508609699355

0.7703118604837887 0.7065362461404738 0.2960390347476907

0.4238299282150150 0.0285272795580241 0.6548114375355969

0.0936287074256285 0.3651017633715624 0.4677475193029558

0.0318900584103713 0.1983431639114511 0.2981632399757470

0.6871965461049798 0.5386593392615375 0.6743116279750863

0.3686241673327740 0.8585383355134822 0.4656460920404889

0.2828946693572038 0.9699315761958366 0.2668055335377031

0.9575621641447932 0.3142525203887116 0.6095635358565688

|                    |                    |                    |
|--------------------|--------------------|--------------------|
| 0.6289634607559756 | 0.6431439675405034 | 0.4382139905446879 |
| 0.2282298318168356 | 0.3161114974422645 | 0.3770626401644476 |
| 0.8978175559476278 | 0.6458935497455934 | 0.7117626334906345 |
| 0.5604082245880276 | 0.9881115172750149 | 0.5436337881398803 |
| 0.2692750090253302 | 0.9751538044275104 | 0.5296209716297067 |
| 0.9294207222220822 | 0.3051364099382606 | 0.3458245051770375 |
| 0.7601045277818733 | 0.1966030788429095 | 0.5350986940677529 |
| 0.4256161614146475 | 0.5284504696760295 | 0.3651515184681198 |
| 0.0990062190890281 | 0.8650123957252133 | 0.6965034349226780 |
| 0.5477184168240228 | 0.7157299053741026 | 0.5574213197495416 |
| 0.2177851665403402 | 0.0594907169779722 | 0.3850968697695918 |
| 0.8722644079887993 | 0.3866074685708102 | 0.7289160509625556 |
| 0.1848971452841379 | 0.8097668051298169 | 0.3771025192460668 |
| 0.8521022624075146 | 0.1351006966722615 | 0.7082577923204884 |
| 0.5222769158615824 | 0.4715968826496920 | 0.5467255586580619 |
| 0.5264054530768731 | 0.1927239143194925 | 0.5298285332437592 |
| 0.1961713291974398 | 0.5213437431562077 | 0.3475366002056974 |
| 0.8605104789345660 | 0.8661200388875075 | 0.7032215256872688 |
| 0.3077407095369235 | 0.4620843199651527 | 0.5332773936817664 |
| 0.9735993191858093 | 0.7937695110219479 | 0.3620239091260726 |
| 0.6354351873847340 | 0.1359625400850963 | 0.6987078131075912 |
| 0.7845288715984693 | 0.7175107014181390 | 0.5577833102041848 |
| 0.4414881139479772 | 0.0555616237234692 | 0.3865529205696749 |
| 0.1133481469267760 | 0.3806840023292193 | 0.7268179556012649 |
| 0.6910429205702302 | 0.2729042901020801 | 0.3774418550299092 |
| 0.3656224416715194 | 0.6188912787461125 | 0.7054820235511855 |
| 0.0302486441906763 | 0.9407046317767656 | 0.5426349287451132 |
| 0.3092711158387569 | 0.2311690058211141 | 0.5297143892635043 |
| 0.9797768627421101 | 0.5709827448062818 | 0.3415165165120876 |
| 0.6270888513166495 | 0.8931846889330822 | 0.7042507466104923 |
| 0.0377245091408642 | 0.7393633028171945 | 0.5328001334812278 |
| 0.7078096751974745 | 0.0778422420644595 | 0.3635499243900943 |
| 0.3666292506408544 | 0.3991250265534483 | 0.6990808957997674 |
| 0.7749149488017681 | 0.9557766906356043 | 0.5584576909170219 |
| 0.4461115071525272 | 0.2839411297935241 | 0.3851305628164834 |
| 0.1210297577024826 | 0.6263654652908509 | 0.7273202685690736 |
| 0.1416932150759824 | 0.1451522756642747 | 0.3291165233740817 |
| 0.8132679968988596 | 0.4800733111764817 | 0.6791512928365553 |
| 0.6002964660183853 | 0.6230052623825328 | 0.3185662697535239 |
| 0.2569604487782189 | 0.9543961712598501 | 0.6515236185081518 |
| 0.9266388907107944 | 0.2902657571089278 | 0.4932861681943685 |
| 0.4737147001463707 | 0.8084224518339513 | 0.5154397906451195 |
| 0.3565193164692588 | 0.8938176992422824 | 0.3304455764665525 |
| 0.0192603508758041 | 0.2287161097872680 | 0.6737068464082190 |

|                    |                    |                    |
|--------------------|--------------------|--------------------|
| 0.8773673957372431 | 0.8746522580180356 | 0.3203338979415369 |
| 0.5460903481921492 | 0.2005673735815870 | 0.6516591301203073 |
| 0.2114469478564910 | 0.5335759303790519 | 0.4911104353348386 |
| 0.6903145141059640 | 0.5604173519625005 | 0.5031157258452532 |
| 0.6068500560132938 | 0.3588453632378441 | 0.3274454755070715 |
| 0.2694709621286866 | 0.6870788025091028 | 0.6712169259265425 |
| 0.6258104466071481 | 0.9006180082074611 | 0.3207598736343779 |
| 0.2952260289747095 | 0.2408926931623198 | 0.6516847260630243 |
| 0.9667609599320869 | 0.5730703966765707 | 0.4938727122930717 |
| 0.9416652992532994 | 0.0287772969153114 | 0.5124887281437763 |
| 0.9345889765918662 | 0.7891277494802965 | 0.4835037500427611 |
| 0.4749478686067707 | 0.3077414739301719 | 0.5003488576139015 |
| 0.1467250679222310 | 0.6450513620544071 | 0.3452855133059176 |
| 0.7967767817255932 | 0.9735311376663982 | 0.6778245550907663 |
| 0.5897098229463126 | 0.1183813278674999 | 0.3235501867807448 |
| 0.2615335125405059 | 0.4543809861870894 | 0.6615446358734177 |
| 0.7115194019782022 | 0.0415452113908112 | 0.4861888940420167 |
| 0.1916628401230641 | 0.0631987843961456 | 0.5004793101261658 |
| 0.8557023661342358 | 0.3986832266980483 | 0.3449877376540719 |
| 0.5016086551156895 | 0.7483287499550754 | 0.6993801161371079 |
| 0.3825326288696215 | 0.3695832628556782 | 0.3232278337955636 |
| 0.0527908977886380 | 0.7042391747803922 | 0.6625720437611489 |
| 0.4626556935674129 | 0.5720498276957694 | 0.4894882893254975 |
| 0.4373162801076454 | 0.0246719490566719 | 0.5023099971167424 |
| 0.1016999504926925 | 0.3540437943645513 | 0.3457915900913445 |
| 0.8043810028640028 | 0.7070987886162804 | 0.6741160721420811 |
| 0.1327602351147061 | 0.9114792865990836 | 0.3219524928196315 |
| 0.7963570987965407 | 0.2398943389916725 | 0.6646523704126902 |
| 0.7016358797637947 | 0.3014162552063552 | 0.4984425314591058 |
| 0.6989984749326487 | 0.7989306818336943 | 0.5003395906305966 |
| 0.2005581720930792 | 0.2977566610185977 | 0.4974941433255166 |
| 0.2034637999782778 | 0.7997215831857142 | 0.4972586509733652 |
| 0.8714640386450893 | 0.1272509226109074 | 0.3342485454794305 |
| 0.5230237333303666 | 0.4541098821122960 | 0.6672064728811817 |
| 0.3747857335176855 | 0.6420708860042699 | 0.3353792810083179 |
| 0.0329732444069095 | 0.9604160591292420 | 0.6642089317937019 |
| 0.3681652410786029 | 0.1325955299072383 | 0.3102546517700289 |
| 0.0347280047347077 | 0.4645203676514945 | 0.6831997439497293 |
| 0.8609825063330819 | 0.6294266115442668 | 0.3307911852756154 |
| 0.5437466882071093 | 0.9743892323392841 | 0.6645630518166203 |
| 0.5239823112090284 | 0.6883203616491217 | 0.7880858389747994 |
| 0.4949201596660643 | 0.7022810427320603 | 0.8468711719550333 |
| 0.5659988147919668 | 0.6193680272372244 | 0.7785557898639891 |
| 0.6419380814134388 | 0.6644353335925723 | 0.7687042552805802 |

**The perfect Cu<sub>7</sub>-O<sub>v6</sub>-[TS-CO-OH]\* surface**

O In Cu In C O H

1.00000000000000

14.4443000000000001 0.0000000000000000 0.0000000000000000

-7.2221500000000001 12.5091307398836005 0.0000000000000000

0.00000000000000011 0.00000000000000019 17.9855000000000018

O In Cu In C O H

71 27 1 20 1 2 1

Selective dynamics

Direct

|                    |                    |                    |   |   |   |
|--------------------|--------------------|--------------------|---|---|---|
| 0.8413896694033220 | 0.6128279716191148 | 0.4561480421251156 | T | T | T |
| 0.5154339421514923 | 0.9518435635697905 | 0.2883242386420106 | T | T | T |
| 0.1727331904803648 | 0.2811144259753374 | 0.6198480048719024 | T | T | T |
| 0.7927206804699251 | 0.9605496457127359 | 0.2978363892996984 | T | T | T |
| 0.4649336156841086 | 0.2853136051815228 | 0.6636646150072020 | T | T | T |
| 0.1325165314118111 | 0.6249221029801199 | 0.4679541874575954 | T | T | T |
| 0.3009717527506277 | 0.7308270178288985 | 0.2990703148092013 | T | T | T |
| 0.9759195895757541 | 0.0699931733882689 | 0.6354929425422960 | T | T | T |
| 0.6400516242464104 | 0.4056310535129412 | 0.4645883315887003 | T | T | T |
| 0.5289678183150449 | 0.2083566920483355 | 0.2666274197981108 | T | T | T |
| 0.1824823677282582 | 0.5397599974525111 | 0.6087562612603932 | T | T | T |
| 0.8547763091880817 | 0.8804074130824535 | 0.4419948473098147 | T | T | T |
| 0.8860784315219685 | 0.1283803726735149 | 0.4558507515979933 | T | T | T |
| 0.5469818105711675 | 0.4626881892443099 | 0.2869723163196673 | T | T | T |
| 0.2188890468569301 | 0.7910628587870242 | 0.6196933619420891 | T | T | T |
| 0.5393614105590155 | 0.7312264903442495 | 0.2982035263901487 | T | T | T |
| 0.2046433709820339 | 0.0761064135267686 | 0.6561424431904203 | T | T | T |
| 0.8738930767705817 | 0.4069960749594486 | 0.4677298295638094 | T | T | T |
| 0.7684673043741734 | 0.4687832118601690 | 0.2979637256883036 | T | T | T |
| 0.4293698114947538 | 0.8071363617768105 | 0.6383668838011757 | T | T | T |
| 0.0943065203976854 | 0.1341925846926165 | 0.4646933549356003 | T | T | T |
| 0.2895264171737821 | 0.2189213517270981 | 0.2672845622328766 | T | T | T |
| 0.9573017782478600 | 0.5425431586779653 | 0.6094277591995811 | T | T | T |
| 0.6174825299312034 | 0.8751303691899964 | 0.4409811651005832 | T | T | T |
| 0.3700149676546450 | 0.6575019558300171 | 0.4562625566567802 | T | T | T |
| 0.0362986019337791 | 0.9833755098907684 | 0.2889587591943391 | T | T | T |
| 0.7063237385860118 | 0.3315410123804904 | 0.6191871450825244 | T | T | T |
| 0.7681460674757865 | 0.7064961677427750 | 0.2975012994677329 | T | T | T |
| 0.4215542918015270 | 0.0278993374369114 | 0.6546623044332033 | T | T | T |
| 0.0919832001894250 | 0.3654273356628947 | 0.4681695959884202 | T | T | T |
| 0.0306998410110089 | 0.1984340949845552 | 0.2988396976891443 | T | T | T |
| 0.6893937556485233 | 0.5308875972423328 | 0.6435085803074334 | T | T | T |
| 0.3660519276112356 | 0.8580421096817092 | 0.4664670476281030 | T | T | T |
| 0.2803222243051892 | 0.9694694642596353 | 0.2677105017843613 | T | T | T |

|                    |                    |                    |   |   |   |
|--------------------|--------------------|--------------------|---|---|---|
| 0.9558011359428217 | 0.3149054615696207 | 0.6099037220471443 | T | T | T |
| 0.6274308301621651 | 0.6412939863525682 | 0.4413254219124984 | T | T | T |
| 0.2273261202300955 | 0.3166270268397594 | 0.3778958867419362 | T | T | T |
| 0.8871418035292975 | 0.6442994143495521 | 0.7120393207026318 | T | T | T |
| 0.5577510190810552 | 0.9876357557176371 | 0.5434431645998660 | T | T | T |
| 0.2670452508640626 | 0.9747054191459753 | 0.5301388558388378 | T | T | T |
| 0.9279792546330896 | 0.3055243927210448 | 0.3453662931778811 | T | T | T |
| 0.7583359505762858 | 0.1954730411093024 | 0.5343745439336094 | T | T | T |
| 0.4237683744364215 | 0.5284423387711715 | 0.3653207220001985 | T | T | T |
| 0.0968375666751783 | 0.8656634332466487 | 0.6980459988722779 | T | T | T |
| 0.5445296670084102 | 0.7158164966142117 | 0.5584314193235014 | T | T | T |
| 0.2163471583317967 | 0.0597633747257318 | 0.3865224200518815 | T | T | T |
| 0.8702469794565439 | 0.3882975769805263 | 0.7285711496595836 | T | T | T |
| 0.1831524212100378 | 0.8095637499053535 | 0.3780327853937585 | T | T | T |
| 0.8519951395960620 | 0.1371211858166159 | 0.7093203992458448 | T | T | T |
| 0.5123810540019400 | 0.4669460492065228 | 0.5440643420233205 | T | T | T |
| 0.5233132299120606 | 0.1922484099626719 | 0.5301783795939905 | T | T | T |
| 0.1941323532962657 | 0.5213235439870449 | 0.3466981293133694 | T | T | T |
| 0.8603664397357492 | 0.8685382797080292 | 0.7030563297756035 | T | T | T |
| 0.3049925458300483 | 0.4634344296090540 | 0.5340840231781019 | T | T | T |
| 0.9712412102335459 | 0.7933121201452532 | 0.3639782044881879 | T | T | T |
| 0.6332678204652157 | 0.1355015469347611 | 0.6998906816819542 | T | T | T |
| 0.7831187873583698 | 0.7244680605068133 | 0.5598742073942767 | T | T | T |
| 0.4396340578888548 | 0.0553591225400907 | 0.3869210662192157 | T | T | T |
| 0.1118023320210888 | 0.3817928888488347 | 0.7276737770025058 | T | T | T |
| 0.6891719367059417 | 0.2727650254868877 | 0.3775068180518956 | T | T | T |
| 0.3624768822917957 | 0.6196188169079672 | 0.7067042021679990 | T | T | T |
| 0.0287049311320842 | 0.9414992039184084 | 0.5430546168344799 | T | T | T |
| 0.3083285523359463 | 0.2314201168487189 | 0.5307823699351999 | T | T | T |
| 0.9776130672080281 | 0.5715471955247595 | 0.3456398557724116 | T | T | T |
| 0.6280221308424048 | 0.8968837153306742 | 0.7006721617343113 | T | T | T |
| 0.0357636338298441 | 0.7401597592124178 | 0.5337034557327072 | T | T | T |
| 0.7060918620498471 | 0.0776193111212733 | 0.3634703999706679 | T | T | T |
| 0.3691055113876741 | 0.4024788902287881 | 0.6994366091758055 | T | T | T |
| 0.7739175716081071 | 0.9570929912574868 | 0.5581280184653129 | T | T | T |
| 0.4441997616116543 | 0.2832418350330265 | 0.3841001843991350 | T | T | T |
| 0.1163697061280321 | 0.6271522762623103 | 0.7283896532132285 | T | T | T |
| 0.1401537290374837 | 0.1451336454299832 | 0.3305825917767525 | T | T | T |
| 0.8115387043460912 | 0.4799536846087114 | 0.6746430353542135 | T | T | T |
| 0.5988614538301793 | 0.6225955360895190 | 0.3215249041210770 | T | T | T |
| 0.2544091841417661 | 0.9540831710925103 | 0.6520010516904061 | T | T | T |
| 0.9249201572499044 | 0.2901753394080806 | 0.4938320702414206 | T | T | T |
| 0.4716419518310435 | 0.8084533299203952 | 0.5154262282713593 | T | T | T |
| 0.3544224177587904 | 0.8936171433525459 | 0.3310676416781968 | T | T | T |

|                    |                    |                    |   |   |   |
|--------------------|--------------------|--------------------|---|---|---|
| 0.0186280218447146 | 0.2303234062363829 | 0.6740588243811084 | T | T | T |
| 0.8756924950931928 | 0.8746592283120098 | 0.3214413931427774 | T | T | T |
| 0.5442995157070798 | 0.1999488722695260 | 0.6519387410698213 | T | T | T |
| 0.2091697900186039 | 0.5339330171473379 | 0.4927376782562710 | T | T | T |
| 0.6882416926638132 | 0.5586589215710024 | 0.5120441337510977 | T | T | T |
| 0.6054069243509205 | 0.3590665594348131 | 0.3279165943589866 | T | T | T |
| 0.2659026255987711 | 0.6868464212676232 | 0.6731581356147684 | T | T | T |
| 0.6242962535340452 | 0.9004878123832399 | 0.3211951302680416 | T | T | T |
| 0.2954243382786053 | 0.2422185691071205 | 0.6528453322812480 | T | T | T |
| 0.9650354985974475 | 0.5740971521052206 | 0.4933484908129592 | T | T | T |
| 0.9402387523437136 | 0.0295781130650127 | 0.5124420696104375 | T | T | T |
| 0.9308708344174935 | 0.7891736169460173 | 0.4859259296881706 | T | T | T |
| 0.4727409367576055 | 0.3071134817511543 | 0.4986303170008938 | T | T | T |
| 0.1450693042644327 | 0.6449884058781771 | 0.3463541318356319 | T | T | T |
| 0.797622239453113  | 0.9759452496175905 | 0.6776151083341566 | T | T | T |
| 0.5877868699195459 | 0.1180114074984884 | 0.3238241801945139 | T | T | T |
| 0.2612253435152033 | 0.4565735377507097 | 0.6632184634026929 | T | T | T |
| 0.7099340604111315 | 0.0410672769265099 | 0.4863330003397712 | T | T | T |
| 0.1899990256474827 | 0.0637712410416875 | 0.5022178510284205 | T | T | T |
| 0.8541133286979193 | 0.3987722537678618 | 0.3460738827027320 | T | T | T |
| 0.5037570330969929 | 0.7472737164774799 | 0.6940955291759946 | T | T | T |
| 0.3807919624062114 | 0.3696352067108387 | 0.3229569517700274 | T | T | T |
| 0.0466272357973207 | 0.7045012930811961 | 0.6643179514161737 | T | T | T |
| 0.4602911678469274 | 0.5719564362895743 | 0.4894756799736174 | T | T | T |
| 0.4347874498347555 | 0.0243889589778758 | 0.5027573244880420 | T | T | T |
| 0.1003136398715991 | 0.3540966453179731 | 0.3464655170603694 | T | T | T |
| 0.7894668895627971 | 0.7044962496032778 | 0.6775170444779671 | T | T | T |
| 0.1305965097989777 | 0.9111881567578805 | 0.3239912097711676 | T | T | T |
| 0.7944270699896753 | 0.2400877235137542 | 0.6653004561813515 | T | T | T |
| 0.6992873810956426 | 0.3004606252587427 | 0.4984412515255077 | T | T | T |
| 0.6972672586446247 | 0.7987345962284775 | 0.5013606935631955 | T | T | T |
| 0.1999767469492089 | 0.2989695819141769 | 0.4986769617996096 | T | T | T |
| 0.2010280270635844 | 0.7995586597304204 | 0.4985843104609761 | T | T | T |
| 0.8699604075678505 | 0.1274245385910185 | 0.3343431007933020 | T | T | T |
| 0.5238937309252883 | 0.4548152448949980 | 0.6632251360404989 | T | T | T |
| 0.3728383096994837 | 0.6420256283198720 | 0.3356139857013553 | T | T | T |
| 0.0292288573482300 | 0.9594639552316252 | 0.6643861230071311 | T | T | T |
| 0.3661563144220063 | 0.1322497969307822 | 0.3103299767416590 | T | T | T |
| 0.0326870089647864 | 0.4652667395305592 | 0.6838861814581925 | T | T | T |
| 0.8573488853304441 | 0.6292189356829899 | 0.3344009630777099 | T | T | T |
| 0.5424218766764723 | 0.9750744128617437 | 0.6643927438678182 | T | T | T |
| 0.5602790614571503 | 0.7005024113038241 | 0.7726293211284562 | T | T | T |
| 0.5566474776010395 | 0.7079072171610241 | 0.8378634590147475 | T | T | T |
| 0.6212977624556817 | 0.6361309631844765 | 0.7473117881357410 | T | T | T |

0.6357249277023620 0.6153096427642312 0.7959427550757561 T T T

### The perfect Cu<sub>7</sub>-O<sub>v6</sub>-[CO-OH]\* surface

O In Cu In C O H

1.000000000000000

14.4443000000000001 0.000000000000000 0.000000000000000

-7.22214999999999965 12.5091307398835685 0.000000000000000

0.00000000000000011 0.00000000000000019 17.985499999999983

O In Cu In C O H

71 27 1 20 1 2 1

Direct

0.8418392215215736 0.6129833103237905 0.4557235683104807

0.5152451819865785 0.9518067446381472 0.2893119503092559

0.1728487077293446 0.2808097694473794 0.6201484525757103

0.7928297433051054 0.9606303614911520 0.2979911730301225

0.4694923434395707 0.2892659646929315 0.6641621096174923

0.1329626117857084 0.6253272370754931 0.4684122724375243

0.3012319319206807 0.7311857523025962 0.3000188873250906

0.9763788385949876 0.0696206735697800 0.6360128005480016

0.6397322814547152 0.4045591958043651 0.4623740322152918

0.5288855914533365 0.2090077593309794 0.2680998101935237

0.1823951143878571 0.5391328193354985 0.6090872892963777

0.8547533366303197 0.8807234697649956 0.4424313909205405

0.8870064382571616 0.1282825820907909 0.4557140953511752

0.5473110055039666 0.4631633360240157 0.2884036247828578

0.2178865817788326 0.7910357410174617 0.6202526088849908

0.5393722129366163 0.7316484293949385 0.2989121530639938

0.2058745784273756 0.0775430880223335 0.6553143664226143

0.8742004374936432 0.4070053276423167 0.4679273990278289

0.7685751347138333 0.4688911143556498 0.2983812089356956

0.4268031101801601 0.8094722400317670 0.6380370558171321

0.0947122088952485 0.1345688410653784 0.4654116481879047

0.2894576692658677 0.2192867370918853 0.2682280513592039

0.9597993846399078 0.5426039126870190 0.6092481845906966

0.6174059841358701 0.8741884295052292 0.4419775793561345

0.3709025701225528 0.6580452487261257 0.4573486752415779

0.0362465618311788 0.9838646151650282 0.2896779679207545

0.7088700384613098 0.3268532436898924 0.6190009724134145

0.7674648783984356 0.7064969709461960 0.2983215847612169

0.4221869283429938 0.0290754804670634 0.6534840269992866

0.0915605334138536 0.3653572604450931 0.4686855394415617

0.0310123246415775 0.1987551868920131 0.2991927368866615

0.6970441827027605 0.5225237832827936 0.6313337543437086

0.3657331284890126 0.8586001612642026 0.4667694789581037

0.2805276788325329 0.9700379479601261 0.2689253485287417

0.9557117838509538 0.3139294859649328 0.6104776376256387



|                    |                    |                    |
|--------------------|--------------------|--------------------|
| 0.6265841209753792 | 0.6420493767068464 | 0.4428863834459334 |
| 0.2271855766146152 | 0.3169934024164986 | 0.3786466063372242 |
| 0.8877114594038547 | 0.6439565306046990 | 0.7118815829915364 |
| 0.5582076263232557 | 0.9879785191116131 | 0.5435227671163848 |
| 0.2668035196167962 | 0.9745929679629465 | 0.5304674206987555 |
| 0.9281737158711809 | 0.3057833741632635 | 0.3447459841084138 |
| 0.7588124637609956 | 0.1942915771593809 | 0.5334955470851266 |
| 0.4236592550387184 | 0.5288424667992228 | 0.3661490127399557 |
| 0.0980127802288375 | 0.8667797657983939 | 0.6990021750544205 |
| 0.5434538824658193 | 0.7170710689821794 | 0.5619174140272455 |
| 0.2160913907742301 | 0.0598983673291937 | 0.3876206275034131 |
| 0.8711990975329931 | 0.3885335241266722 | 0.7288004863249283 |
| 0.1827913588060147 | 0.8096073066167693 | 0.3785987063024079 |
| 0.8527375995595853 | 0.1365599603383167 | 0.7101641153172483 |
| 0.5128752097447906 | 0.4679157035079577 | 0.5449111600440221 |
| 0.5233610092303411 | 0.1929529750174211 | 0.5306283683445527 |
| 0.1942959773859632 | 0.5216152750776343 | 0.3477979328913039 |
| 0.8599654938006550 | 0.8666589040669848 | 0.7025483051788350 |
| 0.3045980205691869 | 0.4636055735331122 | 0.5341783813544589 |
| 0.9709037335123057 | 0.7934227477266416 | 0.3640481829580245 |
| 0.6330549108250523 | 0.1346872708946238 | 0.7015059691298430 |
| 0.7832555953547148 | 0.7255688045235266 | 0.5602771653233471 |
| 0.4399324488864564 | 0.0557954445761214 | 0.3880386511974168 |
| 0.1121987715427973 | 0.3814591733253380 | 0.7282566093713666 |
| 0.6902275835342266 | 0.2722375379654451 | 0.3776074261468131 |
| 0.3616170911074680 | 0.6190584908257735 | 0.7067517996147220 |
| 0.0289542942740292 | 0.9415588448408538 | 0.5433932385521305 |
| 0.3089808931031439 | 0.2322399478394237 | 0.5313589937526224 |
| 0.9779408793354570 | 0.5718296840223498 | 0.3458892150680818 |
| 0.6298157368321805 | 0.8983519378705748 | 0.7002806317947724 |
| 0.0353383314492116 | 0.7402326217980399 | 0.5338220422217262 |
| 0.7062164615437947 | 0.0770436504265108 | 0.3636934115332553 |
| 0.3707601385511766 | 0.4032518965394082 | 0.6979907802451246 |
| 0.7746657695209853 | 0.9576281234241995 | 0.5584835988482463 |
| 0.4431800833673918 | 0.2832992367797430 | 0.3854070789133024 |
| 0.1167381520377720 | 0.6271887015218353 | 0.7291224192628432 |
| 0.1402283613717047 | 0.1454564782290498 | 0.3316193948257090 |
| 0.8128856680720332 | 0.4793703889343301 | 0.6727013867102740 |
| 0.5984416723124658 | 0.6228356965929380 | 0.3230443014483396 |
| 0.2548513048891984 | 0.9548376591131607 | 0.6522899004364781 |
| 0.9248206872732179 | 0.2897967273750632 | 0.4945294941797325 |
| 0.4712109991329934 | 0.8091952651112929 | 0.5159907728924039 |
| 0.3543678757294497 | 0.8940157963210782 | 0.3324472537875046 |
| 0.0192977334605092 | 0.2300895622216618 | 0.6743483823068162 |

|                    |                    |                    |
|--------------------|--------------------|--------------------|
| 0.8755941472066773 | 0.8747212387657128 | 0.3221980656442875 |
| 0.5459545405767355 | 0.2011979916154191 | 0.6524280736148930 |
| 0.2091149779316723 | 0.5339545826573511 | 0.4931810700358783 |
| 0.6893293246891160 | 0.5576764617309653 | 0.5119208151776634 |
| 0.6055981610051502 | 0.3595313204516192 | 0.3301188053940581 |
| 0.2652353136338484 | 0.6863317635449341 | 0.6731564231092027 |
| 0.6245255424174506 | 0.9006450130829670 | 0.3220987830963958 |
| 0.2988630479582579 | 0.2445587198762411 | 0.6533060640553806 |
| 0.9652599732061024 | 0.5742734748291436 | 0.4935810657394640 |
| 0.9406458512313046 | 0.0294598499948038 | 0.5126963782020716 |
| 0.9298706244929126 | 0.7888717582505809 | 0.4867506209219616 |
| 0.4735991496376816 | 0.3088521286377628 | 0.5000123080111668 |
| 0.1452440618042473 | 0.6453593004999992 | 0.3469761315003104 |
| 0.7991594491332190 | 0.9753465249308888 | 0.6779363809441113 |
| 0.5876446201539318 | 0.1180031219488205 | 0.3245243791940504 |
| 0.2618238472937557 | 0.4557894452994938 | 0.6636360306199559 |
| 0.7104736306165832 | 0.0404775264676806 | 0.4864110224056720 |
| 0.1904914166044491 | 0.0645918309314599 | 0.5036131609249552 |
| 0.8544603801637781 | 0.3990929378682352 | 0.3463605948520313 |
| 0.5044193613941147 | 0.7468265046383932 | 0.6921642563150502 |
| 0.3809056169960121 | 0.3700263536456195 | 0.3239451074486380 |
| 0.0461249351749112 | 0.7045568555526520 | 0.6652678355388222 |
| 0.4606748762284473 | 0.5722233111738422 | 0.4914761684012257 |
| 0.4347839326269876 | 0.0249570585509056 | 0.5039982350088210 |
| 0.1002376329849696 | 0.3542304938152358 | 0.3471782929774673 |
| 0.7850353839692655 | 0.6990114564526257 | 0.6785888378493803 |
| 0.1304627291691973 | 0.9116161033303055 | 0.3248234163336039 |
| 0.7946893420963613 | 0.2393540782325342 | 0.6662663917241850 |
| 0.6991629623763336 | 0.2995140228275961 | 0.4984704386052385 |
| 0.6972984621962548 | 0.7983916612489176 | 0.5035975351242016 |
| 0.2000941331809467 | 0.2991120613102267 | 0.4994687053655067 |
| 0.2006102666841496 | 0.7998518460406214 | 0.4992273617842788 |
| 0.8702632339097993 | 0.1276438694369411 | 0.3345556440792826 |
| 0.5314490472115642 | 0.4611674619258235 | 0.6652495965166216 |
| 0.3730847914066935 | 0.6424363385175794 | 0.3367016926184991 |
| 0.0284093605002956 | 0.9580487402269017 | 0.6647099515618847 |
| 0.3661907268886966 | 0.1328657187762855 | 0.3119707496627419 |
| 0.0332410532248167 | 0.4651003427037628 | 0.6843049976368357 |
| 0.8572651112661501 | 0.6293825400504609 | 0.3345119103856203 |
| 0.5433543674115779 | 0.9756713007064108 | 0.6643363531538158 |
| 0.5253090927823367 | 0.7350042435718682 | 0.8005167077453785 |
| 0.5060824251716449 | 0.7552935732544769 | 0.8582043943098767 |
| 0.6258589976596076 | 0.6098236805248377 | 0.7277365445124784 |
| 0.5931007205492976 | 0.6406859381144633 | 0.7583172217728499 |

**The perfect Cu<sub>7</sub>-O<sub>v6</sub>-[TS-CO-O]\* surface**

| O                   | In | Cu | In | C                   | O                   |
|---------------------|----|----|----|---------------------|---------------------|
| 1.000000000000000   |    |    |    |                     |                     |
| 14.4443000000000001 |    |    |    | 0.000000000000000   | 0.000000000000000   |
| -7.2221500000000001 |    |    |    | 12.5091307398836005 | 0.000000000000000   |
| 0.00000000000000011 |    |    |    | 0.0000000000000019  | 17.9855000000000018 |

| O  | In | Cu | In | C | O |
|----|----|----|----|---|---|
| 71 | 27 | 1  | 20 | 1 | 2 |

**Direct**

|                    |                    |                    |
|--------------------|--------------------|--------------------|
| 0.8401977219606953 | 0.6139176852867856 | 0.4586240085449730 |
| 0.5142589107358621 | 0.9536134594991106 | 0.2889725965749597 |
| 0.1694313653193737 | 0.2810699303133055 | 0.6195022646933347 |
| 0.7920138436381898 | 0.9622127382548490 | 0.2982349442876253 |
| 0.4687239067983606 | 0.2955113245090739 | 0.6486167279619232 |
| 0.1306535717751151 | 0.6253925051828914 | 0.4691170296343588 |
| 0.2989185380167484 | 0.7325893928848867 | 0.2992195225216790 |
| 0.9753936888673452 | 0.0715907955735100 | 0.6350292255188759 |
| 0.6391265294135450 | 0.4070881636315596 | 0.4701700565302836 |
| 0.5272226792484190 | 0.2108131287767231 | 0.2709374712697736 |
| 0.1801064513071747 | 0.5392933212568651 | 0.6104168402660823 |
| 0.8546518331282061 | 0.8822907182840440 | 0.4426185350080011 |
| 0.8852335374609714 | 0.1302984808373184 | 0.4562240231559290 |
| 0.5459477587765955 | 0.4634296614238320 | 0.2905356331675008 |
| 0.2207805918541162 | 0.7912019041550502 | 0.6210041512493273 |
| 0.5377465432517615 | 0.7325270114649026 | 0.2980383928105005 |
| 0.2049909150512919 | 0.0778339052601800 | 0.6572379056308436 |
| 0.8731018086113763 | 0.4076656124872151 | 0.4693637613562311 |
| 0.7657039822029292 | 0.4700003342129264 | 0.3016209314710545 |
| 0.4319739633352970 | 0.8011114958267203 | 0.6433177470615523 |
| 0.0922834586275589 | 0.1345413574640930 | 0.4640305165783908 |
| 0.2893572840713401 | 0.2200906241831781 | 0.2710224532247045 |
| 0.9558903681125661 | 0.5423631868632248 | 0.6113116765325147 |
| 0.6172698422479551 | 0.8774188839357669 | 0.4399366589767638 |
| 0.3663043251845005 | 0.6580855457512939 | 0.4550298741602294 |
| 0.0354290155280093 | 0.9846025073522239 | 0.2900616545818034 |
| 0.7062040196101326 | 0.3304409454955339 | 0.6220078711425023 |
| 0.7675697855801920 | 0.7082818350602886 | 0.2980965794052264 |
| 0.4213236269946594 | 0.0267380255310559 | 0.6551047919486019 |
| 0.0893921078899801 | 0.3669488657990466 | 0.4684949429921132 |
| 0.0294259023732032 | 0.1996053690741330 | 0.2994540743676546 |
| 0.6857466725907714 | 0.5307007807463024 | 0.6448414507323078 |
| 0.3640885234433839 | 0.8589880167456595 | 0.4676286239723493 |
| 0.2793056512815789 | 0.9715429722688111 | 0.2698176854704504 |
| 0.9527776401281627 | 0.3151966975754552 | 0.6118528442734011 |

|                    |                    |                    |
|--------------------|--------------------|--------------------|
| 0.6271416579283565 | 0.6438084053337381 | 0.4412794695462954 |
| 0.2252064456113162 | 0.3188396459741941 | 0.3786872169639934 |
| 0.8853332401661991 | 0.6477971773402311 | 0.7093372123176123 |
| 0.5557790856569070 | 0.9846893390584471 | 0.5456850265353845 |
| 0.2656618237513879 | 0.9750958303435414 | 0.5317183803997938 |
| 0.9261771206859013 | 0.3071233307795450 | 0.3439055990314696 |
| 0.7564938137365635 | 0.1949515482572292 | 0.5355699021543003 |
| 0.4218030310666325 | 0.5304620009814134 | 0.3647394866809030 |
| 0.0979933767330655 | 0.8673253075787507 | 0.6990491359433416 |
| 0.5408459590524660 | 0.7192036771564537 | 0.5540742072537180 |
| 0.2146303760518171 | 0.0598521643271472 | 0.3883847929112407 |
| 0.8678650323657192 | 0.3901887651455854 | 0.7307621496471043 |
| 0.1817513893211148 | 0.8103528233971634 | 0.3795755217077069 |
| 0.8485572810480112 | 0.1354992588095166 | 0.7098321986138273 |
| 0.5101007104075336 | 0.4739119494939368 | 0.5439572053600579 |
| 0.5241408038683967 | 0.1910623676917580 | 0.5312809573859736 |
| 0.1916720161058102 | 0.5225416836979985 | 0.3450459072954963 |
| 0.8626550204366735 | 0.8715515925152343 | 0.7028924522476933 |
| 0.3026820815180837 | 0.4644155814516996 | 0.5339452448715232 |
| 0.9699978566432816 | 0.7945503780678813 | 0.3661408042420513 |
| 0.6300432708563107 | 0.1332898600573975 | 0.7009819961107053 |
| 0.7814877572178202 | 0.7270091243602058 | 0.5614003174059434 |
| 0.4384927673725397 | 0.0551298941484168 | 0.3891960765892750 |
| 0.1082456565380494 | 0.3809901897445194 | 0.7288642177280754 |
| 0.6881204281556828 | 0.2741255683431764 | 0.3803705775858586 |
| 0.3650528866761977 | 0.6159546398897965 | 0.7033866400819332 |
| 0.0282461609915502 | 0.9428897869289621 | 0.5439713719898992 |
| 0.3041609905575090 | 0.2319514826597637 | 0.5304068366110628 |
| 0.9758522204965202 | 0.5728405235347974 | 0.3469243797952694 |
| 0.6274781136634127 | 0.8877909301925733 | 0.6984233712836628 |
| 0.0350316290527019 | 0.7410583123963845 | 0.5359177393416774 |
| 0.7051215083803736 | 0.0793926059534180 | 0.3637544524266510 |
| 0.3625710399721875 | 0.3985302330293177 | 0.7018340603121251 |
| 0.7730690937529677 | 0.9582009927844672 | 0.5576436812889911 |
| 0.4434039518078509 | 0.2856595417583451 | 0.3911398810365780 |
| 0.1166653169064944 | 0.6281515710064661 | 0.7299648770799632 |
| 0.1385334049427470 | 0.1462318689792075 | 0.3324322589979601 |
| 0.8083082972618532 | 0.4822803294845798 | 0.6760408122364169 |
| 0.5981295251107611 | 0.6243845618469710 | 0.3219563371801605 |
| 0.2543323905198107 | 0.9545964770260291 | 0.6532583763654315 |
| 0.9230623415127703 | 0.2906466189088860 | 0.4958947223649902 |
| 0.4703146805030472 | 0.8104274371865534 | 0.5123224966069285 |
| 0.3529999869909623 | 0.8951139351895986 | 0.3317214327806070 |
| 0.0155191090573913 | 0.2297184142782631 | 0.6745974119485251 |

|                    |                    |                    |
|--------------------|--------------------|--------------------|
| 0.8750050448528809 | 0.8761372267054602 | 0.3225488983611814 |
| 0.5421252140042717 | 0.2009303495895886 | 0.6527244172359357 |
| 0.2070434853849610 | 0.5347073421899250 | 0.4941383942554765 |
| 0.6868518184538775 | 0.5611937947098068 | 0.5154917067194731 |
| 0.6033308716571005 | 0.3603940663759898 | 0.3343460186126328 |
| 0.2658841293270208 | 0.6855374078435449 | 0.6750784010507952 |
| 0.6234898749851295 | 0.9022079521710007 | 0.3205477818205852 |
| 0.2961847162298004 | 0.2440759916129787 | 0.6521355129533215 |
| 0.9633113265669504 | 0.5746418471808136 | 0.4955961006222129 |
| 0.9393443310069388 | 0.0309454232384448 | 0.5127780060114152 |
| 0.9289218689100839 | 0.7897061815682144 | 0.4885907416731028 |
| 0.4729664901038443 | 0.3100205904758369 | 0.5081715122674919 |
| 0.1431503956250580 | 0.6460654441108448 | 0.3473756167201292 |
| 0.7970491873991052 | 0.9744632868314738 | 0.6774802857530240 |
| 0.5865402189359011 | 0.1197205730871838 | 0.3257501653351229 |
| 0.2560688016662361 | 0.4524722786656136 | 0.6630572518950731 |
| 0.7088838145381674 | 0.0419233642417145 | 0.4868427971695643 |
| 0.1887778754945781 | 0.0647599183446605 | 0.5036621273193488 |
| 0.8524191899618926 | 0.4000640570094003 | 0.3476950899022187 |
| 0.5063404819463492 | 0.7292107756899976 | 0.6777241039124848 |
| 0.3802758617040884 | 0.3701228387529356 | 0.3269567714250850 |
| 0.0449188402471823 | 0.7052666558244144 | 0.6658334056506662 |
| 0.4574486678773885 | 0.5730155090010366 | 0.4868812586550590 |
| 0.4337959818651773 | 0.0247266761544393 | 0.5053930423322095 |
| 0.0980899039431573 | 0.3556097779545622 | 0.3465463085033196 |
| 0.7777896253562596 | 0.7030467801320217 | 0.6820393022394928 |
| 0.1291415632224715 | 0.9120402911180949 | 0.3255607177070045 |
| 0.7919499926582886 | 0.2409012241259954 | 0.6680225958510786 |
| 0.6983604572911386 | 0.3010896758186724 | 0.5010015724695400 |
| 0.6971422817035843 | 0.8002834899851796 | 0.5010418196705845 |
| 0.1973334959890526 | 0.2994776645818799 | 0.4988129586465513 |
| 0.1992752014724191 | 0.8000697241029382 | 0.5001793766230342 |
| 0.8688180011035569 | 0.1293712881404740 | 0.3347530289780699 |
| 0.5204295099843078 | 0.4793977994329913 | 0.6639765652058982 |
| 0.3701736594417563 | 0.6428549965525410 | 0.3344005520477181 |
| 0.0285031305503593 | 0.9599412177202991 | 0.6651750581079302 |
| 0.3652632538377996 | 0.1338568810902460 | 0.3152501887722732 |
| 0.0296540706778679 | 0.4656589060911103 | 0.6855447199582275 |
| 0.8557944567673308 | 0.6306346404762143 | 0.3368089393488387 |
| 0.5441355243132162 | 0.9715655972866811 | 0.6668434693144827 |
| 0.6634688132140576 | 0.6712978664185317 | 0.7892022586181676 |
| 0.6274321858658978 | 0.6826231148824164 | 0.8435582902597070 |
| 0.5816825729278926 | 0.6524734105491788 | 0.6984192410636166 |

### The perfect Cu<sub>7</sub>-CO\*<sub>P</sub> surface

O In Cu In C O

|                     |                     |                    |    |   |   |
|---------------------|---------------------|--------------------|----|---|---|
| 1.000000000000000   |                     |                    |    |   |   |
| 14.444300000000001  | 0.000000000000000   | 0.000000000000000  |    |   |   |
| -7.2221499999999965 | 12.5091307398835685 | 0.000000000000000  |    |   |   |
| 0.0000000000000011  | 0.0000000000000019  | 17.985499999999983 |    |   |   |
| O                   | In                  | Cu                 | In | C | O |
| 71                  | 27                  | 1                  | 20 | 1 | 2 |

Direct

|                    |                    |                    |
|--------------------|--------------------|--------------------|
| 0.8420158554320208 | 0.6125112808382543 | 0.4574413485560843 |
| 0.5157929122347319 | 0.9526870117358043 | 0.2880778515058146 |
| 0.1711773313645467 | 0.2798442891346799 | 0.6192171816464939 |
| 0.7934582238080122 | 0.9612366590510492 | 0.2969729245713741 |
| 0.4697903313586171 | 0.2933113282314961 | 0.6470134379232135 |
| 0.1317198246103674 | 0.6237207927893443 | 0.4686177122981214 |
| 0.3002831940589856 | 0.7314851459671716 | 0.2983088038637246 |
| 0.9772017177916130 | 0.0696505155517386 | 0.6353052638473321 |
| 0.6403656702667111 | 0.4055278957273797 | 0.4688474645910383 |
| 0.5282938827951879 | 0.2094784990133966 | 0.2708439882883517 |
| 0.1832907036620533 | 0.5394262252151201 | 0.6105325400883626 |
| 0.8569274131445754 | 0.8819366686551693 | 0.4408953070539369 |
| 0.8869792053952730 | 0.1291776704513001 | 0.4557590796433039 |
| 0.5469812101897870 | 0.4616283492905229 | 0.2895002832322403 |
| 0.2237284415843822 | 0.7900982742825983 | 0.6208220533138071 |
| 0.5390648241103787 | 0.7314073480020219 | 0.2968480890904067 |
| 0.2063239290752023 | 0.0759870825488391 | 0.6556961926829873 |
| 0.8749822311565695 | 0.4072497001253364 | 0.4689455838300704 |
| 0.7668311283521815 | 0.4685299724788854 | 0.3011101941829490 |
| 0.4370068047218882 | 0.8003479598731350 | 0.6448312905287963 |
| 0.0937999744967523 | 0.1332429510288557 | 0.4639769901165508 |
| 0.2903862685915020 | 0.2182668783734679 | 0.2707333117787370 |
| 0.9577219602969411 | 0.5427414172713000 | 0.6116427164367726 |
| 0.6192625272905693 | 0.8770093575939136 | 0.4386935726142578 |
| 0.3673013375328887 | 0.6565216609138045 | 0.4538853615696000 |
| 0.0372175006759030 | 0.9833874445707275 | 0.2890285289847596 |
| 0.7084319466032228 | 0.3298785091684637 | 0.6213839010178070 |
| 0.7692391525214469 | 0.7071795408894156 | 0.2966313983888595 |
| 0.4237302990866711 | 0.0253807720928541 | 0.6545268404589689 |
| 0.0913943907881200 | 0.3662490882624059 | 0.4681436732969946 |
| 0.0308109251899244 | 0.1983737001351872 | 0.2989952075425287 |
| 0.6860982877737594 | 0.5269364121089867 | 0.6420879385136544 |
| 0.3661992758981924 | 0.8574124235252465 | 0.4675735518044180 |
| 0.2807818188364311 | 0.9703046833509974 | 0.2695161793095772 |
| 0.9552571216693867 | 0.3155161583229322 | 0.6111263677169149 |

|                    |                    |                    |
|--------------------|--------------------|--------------------|
| 0.6283196639889286 | 0.6421890933648976 | 0.4390318516394819 |
| 0.2264413758200686 | 0.3173996828951375 | 0.3782212897856875 |
| 0.8825989036165222 | 0.6498395557410970 | 0.7065553545272051 |
| 0.5578875588980289 | 0.9829327118433214 | 0.5455159565164740 |
| 0.2675772679571938 | 0.9735929123942122 | 0.5311797553910436 |
| 0.9277281634601199 | 0.3058485399437975 | 0.3445697718471227 |
| 0.7584686608597448 | 0.1941884688889101 | 0.5349404784729967 |
| 0.4227699313206210 | 0.5290503528860920 | 0.3631949136823433 |
| 0.1004006305853062 | 0.8662582111571816 | 0.6993255472392204 |
| 0.5429384655951609 | 0.7182309881141489 | 0.5518025747914866 |
| 0.2155300190659551 | 0.0580891424427740 | 0.3883498500648615 |
| 0.8698836292874232 | 0.3909061948712013 | 0.7300519110838942 |
| 0.1836659254458993 | 0.8090901581356628 | 0.3793641059642653 |
| 0.8504099146232696 | 0.1351081337625440 | 0.7081773906509800 |
| 0.5113166049823585 | 0.4728199925636800 | 0.5427387450432883 |
| 0.5263292139619475 | 0.1895849288491090 | 0.5303808632748745 |
| 0.1928282602660756 | 0.5212708554610594 | 0.3436709312312238 |
| 0.8619395921446119 | 0.8685378379949482 | 0.7025015067902525 |
| 0.3042061957624329 | 0.4632491523884034 | 0.5332724029719909 |
| 0.9715140982349540 | 0.7931546870561534 | 0.3650336590173772 |
| 0.6324682911032450 | 0.1326485505924050 | 0.7005075988160812 |
| 0.7823421903856942 | 0.7259972075830073 | 0.5580032318412229 |
| 0.4399981090253079 | 0.0533783457179829 | 0.3889008005833726 |
| 0.1105193398396900 | 0.3806796784821969 | 0.7281293414742633 |
| 0.6899930246286815 | 0.2729655003259037 | 0.3797938365987845 |
| 0.3720496966033270 | 0.6159072898470842 | 0.7015426834371232 |
| 0.0290908978883125 | 0.9408384259224788 | 0.5435260823462863 |
| 0.3054336649035294 | 0.2307272518497147 | 0.5297454901521537 |
| 0.9774035738201372 | 0.5715718726329081 | 0.3450200934456114 |
| 0.6309303917908251 | 0.8866930490133899 | 0.6981890751912150 |
| 0.0370210662223233 | 0.7403980384196119 | 0.5354994028738721 |
| 0.7066739764183637 | 0.0783657880172220 | 0.3631505230797991 |
| 0.3649473827117197 | 0.3977754308730368 | 0.7007248931549138 |
| 0.7749298368377898 | 0.9567879092126220 | 0.5567172483094498 |
| 0.4444474378018385 | 0.2843521029399400 | 0.3909704149414351 |
| 0.1192967389282668 | 0.6282703462707790 | 0.7295277703614993 |
| 0.1397209169281566 | 0.1446959740141375 | 0.3321009829170191 |
| 0.8094586542365689 | 0.4831141985826770 | 0.6756581198288045 |
| 0.5993194239510941 | 0.6229188599817459 | 0.3200804862999982 |
| 0.2564424624492687 | 0.9532979163838887 | 0.6527175338258532 |
| 0.9247946817086362 | 0.2898853125348403 | 0.4949917071991199 |
| 0.4726412844119853 | 0.8089213111818735 | 0.5112536605957856 |
| 0.3545818485859157 | 0.8938273003762288 | 0.3311216165437274 |
| 0.0175954034435082 | 0.2291724056543142 | 0.6737987300913507 |

|                    |                    |                    |
|--------------------|--------------------|--------------------|
| 0.8765989301610114 | 0.8751200276238179 | 0.3209698535926293 |
| 0.5441567573435974 | 0.1999862040050980 | 0.6519914608846031 |
| 0.2087101552029302 | 0.5338047380995883 | 0.4938923457958749 |
| 0.6877906844712486 | 0.5596797981751426 | 0.5134583570500940 |
| 0.6045771587720981 | 0.3591451271660242 | 0.3342685382736960 |
| 0.2698339176247100 | 0.6849905511062085 | 0.6753816268527114 |
| 0.6250023763934275 | 0.9012179849336970 | 0.3193944329419015 |
| 0.2984844004099230 | 0.2427639010595428 | 0.6514697715792898 |
| 0.9648124474812386 | 0.5739566153887474 | 0.4956461261747999 |
| 0.9408356233150609 | 0.0293726675253483 | 0.5120804822791444 |
| 0.9304134820958585 | 0.7884013511397922 | 0.4873166416988870 |
| 0.4745976291170405 | 0.3088963531452768 | 0.5083441263579329 |
| 0.1445489087849069 | 0.6447613908414085 | 0.3466468995597848 |
| 0.8003582149252713 | 0.9742601292056770 | 0.6764089864078878 |
| 0.5880929812939867 | 0.1186608127729197 | 0.3252522356427752 |
| 0.2587106800935366 | 0.4518502815824531 | 0.6621651983217421 |
| 0.7108760787775669 | 0.0410336233535621 | 0.4862063613413021 |
| 0.1902314964966303 | 0.0632980619866720 | 0.5038067060533610 |
| 0.8541637166119579 | 0.3992076138719483 | 0.3471417757551533 |
| 0.5157371838629177 | 0.7318461968092761 | 0.6781656280382050 |
| 0.3814546789521494 | 0.3685266172964902 | 0.3264249161544056 |
| 0.0451369435416297 | 0.7044613934790364 | 0.6659875509574565 |
| 0.4589232030929742 | 0.5716345271819294 | 0.4854353119840091 |
| 0.4357096268180747 | 0.0231928241967010 | 0.5050577001242328 |
| 0.0996985867852787 | 0.3544910578802357 | 0.3461236452574736 |
| 0.7693620345495303 | 0.7014574736887119 | 0.6781053550635058 |
| 0.1307144285610411 | 0.9107266970295413 | 0.3252317539842031 |
| 0.7943041295815501 | 0.2414605904866752 | 0.6670088635008820 |
| 0.7001421334041539 | 0.3001654721154186 | 0.5003804803691909 |
| 0.6987896072114320 | 0.7991114839004863 | 0.4983743333499183 |
| 0.1990615229185314 | 0.2983170905336571 | 0.4983068754627204 |
| 0.2012640635689135 | 0.7986706145836170 | 0.5000049756350101 |
| 0.8702217417802902 | 0.1280714025920796 | 0.3342522704010865 |
| 0.5230428713981763 | 0.4832726581436005 | 0.6635553730861696 |
| 0.3711915558395032 | 0.6413569733074582 | 0.3331673821749441 |
| 0.0287595036123554 | 0.9564358328556830 | 0.6647455684784435 |
| 0.3665196597517890 | 0.1324920277880508 | 0.3153673176510375 |
| 0.0319404715911627 | 0.4656703456645165 | 0.6852793152278071 |
| 0.8574426014305017 | 0.6293488505099006 | 0.3355593574531825 |
| 0.5468241753159823 | 0.9712210395885924 | 0.6665530846725922 |
| 0.5450102421275584 | 0.7447506488181865 | 0.8847988383740999 |
| 0.4954904568670596 | 0.7843861550628026 | 0.8714072227585440 |
| 0.5962507511009786 | 0.6527326716067672 | 0.6951331906490760 |



### The perfect Cu<sub>7</sub>-H<sub>2</sub>\*\_P surface

O In Cu In H

|                     |                     |                     |  |  |
|---------------------|---------------------|---------------------|--|--|
| 1.000000000000000   |                     |                     |  |  |
| 14.4442996979000000 | 0.0000000000000000  | 0.0000000000000000  |  |  |
| -7.2221498489000000 | 12.5091304781999995 | 0.0000000000000000  |  |  |
| 0.0000000000000000  | 0.0000000000000000  | 17.9855003356999994 |  |  |

|    |    |    |    |   |
|----|----|----|----|---|
| O  | In | Cu | In | H |
| 72 | 27 | 1  | 20 | 2 |

Direct

|                    |                    |                    |
|--------------------|--------------------|--------------------|
| 0.8424327700685662 | 0.6128961494335826 | 0.4574553503984468 |
| 0.5161202177147428 | 0.9531297091234396 | 0.2882273703936684 |
| 0.1718006472841768 | 0.2803968577790722 | 0.6192532042143106 |
| 0.7938853501465767 | 0.9616611445796260 | 0.2970105534964011 |
| 0.4705341116192406 | 0.2942802025208177 | 0.6472872213587086 |
| 0.1319794374763078 | 0.6242491992318001 | 0.4686145271860232 |
| 0.3007836803992857 | 0.7319804580112946 | 0.2986231070195249 |
| 0.9775602850426187 | 0.0701076850673314 | 0.6352799086944155 |
| 0.6408060420530850 | 0.4059050817843795 | 0.4689840320451744 |
| 0.5287523694485883 | 0.2099078307245329 | 0.2708900345798377 |
| 0.1838130838241978 | 0.5399653916839651 | 0.6103846738532007 |
| 0.8570503618914025 | 0.8822604972867707 | 0.4409543743283031 |
| 0.8873213895977592 | 0.1296038852590721 | 0.4556607764914427 |
| 0.5473750160929034 | 0.4621368478149541 | 0.2895018012745992 |
| 0.2241237781399827 | 0.7906784172053730 | 0.6208770016080188 |
| 0.5395334482294079 | 0.7318318084132245 | 0.2970723354067984 |
| 0.2067821163069079 | 0.0765440032140363 | 0.6558000707985986 |
| 0.8752390736977950 | 0.4075596297981302 | 0.4689667754148052 |
| 0.7671912098754977 | 0.4689294906788919 | 0.3010341508692974 |
| 0.4374163300431057 | 0.8012434251410561 | 0.6458536130152869 |
| 0.0942669126174069 | 0.1336882126695133 | 0.4639765475415281 |
| 0.2909854726600644 | 0.2189127284416350 | 0.2707552720452460 |
| 0.9581606370760676 | 0.5431779162952149 | 0.6116369636810103 |
| 0.6195108224496237 | 0.8772953633873554 | 0.4388151264083280 |
| 0.3677950775226936 | 0.6571454087182032 | 0.4541800669499276 |
| 0.0375612100402267 | 0.9838006304056205 | 0.2892257332156085 |
| 0.7088743386824731 | 0.3302012543322802 | 0.6214026746999497 |
| 0.7695942197695693 | 0.7074972032180845 | 0.2967533307558635 |
| 0.4240010138404411 | 0.0260546743401486 | 0.6546951069105690 |
| 0.0916609036219708 | 0.3664938818965532 | 0.4681780264835468 |
| 0.0312635336913030 | 0.1987982044158595 | 0.2990297943585001 |
| 0.6865349717911303 | 0.5274466855080814 | 0.6422244452148008 |
| 0.3665487223228144 | 0.8578960702494829 | 0.4680637621208300 |
| 0.2811899137788882 | 0.9708388128425935 | 0.2695124207144673 |
| 0.9556349298006681 | 0.3157670819459977 | 0.6111903011506835 |

|                    |                    |                    |
|--------------------|--------------------|--------------------|
| 0.6287572618166333 | 0.6424622789047659 | 0.4392679622798227 |
| 0.2268544547537021 | 0.3178084863189825 | 0.3782140035290830 |
| 0.8828663617512291 | 0.6500842407968970 | 0.7066921742398332 |
| 0.5583630331460760 | 0.9834100891824469 | 0.5456676856879393 |
| 0.2678465713684457 | 0.9741182106710118 | 0.5312861182376164 |
| 0.9281117579661479 | 0.3063266819926382 | 0.3442291898312735 |
| 0.5968111798467163 | 0.6533877296922137 | 0.6957948261338567 |
| 0.7588500188368826 | 0.1944345154156010 | 0.5349666434618666 |
| 0.4232119177130907 | 0.5294892889890177 | 0.3635138207626061 |
| 0.1006815662720310 | 0.8666930468182483 | 0.6992086387103645 |
| 0.5431830946881355 | 0.7186078291838863 | 0.5521331721360720 |
| 0.2160684152064239 | 0.0586616631619294 | 0.3883230241697970 |
| 0.8703373376189164 | 0.391305599995236  | 0.7300943001825217 |
| 0.1842480180069885 | 0.8097521531009527 | 0.3795173432889133 |
| 0.8509830424690332 | 0.1356029204676306 | 0.7084266293387229 |
| 0.5117968170572715 | 0.4734817206101865 | 0.5430455408499406 |
| 0.5266130889991345 | 0.1901283489481091 | 0.5306528688137117 |
| 0.1933374954340752 | 0.5217615091015427 | 0.3441711187637563 |
| 0.8624125478101391 | 0.8689942762513928 | 0.7025168309339026 |
| 0.3045385940701970 | 0.4636595879287910 | 0.5332386138025308 |
| 0.9718752412881945 | 0.7935072014642024 | 0.3650896378520136 |
| 0.6329774078958349 | 0.1333277688562283 | 0.7006067943952315 |
| 0.7827811986819120 | 0.7263426522479444 | 0.5581688134943540 |
| 0.4403999132182332 | 0.0538169872393695 | 0.3889855949002499 |
| 0.1110912607083814 | 0.3812928829811547 | 0.7280524195257737 |
| 0.6903818665756072 | 0.2733783110818722 | 0.3798483498051352 |
| 0.3725977981839166 | 0.6165423723306075 | 0.7013440934751717 |
| 0.0294719614540535 | 0.9414083353958322 | 0.5434519797844417 |
| 0.3059790928360350 | 0.2312779987869653 | 0.5297774296907964 |
| 0.9778586028608681 | 0.5720141688001361 | 0.3449030834564786 |
| 0.6312851572846098 | 0.8870527932316082 | 0.6985570582004625 |
| 0.0372131634029122 | 0.7407793545501393 | 0.5355489235062093 |
| 0.7071750310713010 | 0.0787255576362320 | 0.3631292390226004 |
| 0.3653300984863250 | 0.3983735870459215 | 0.7009213199886530 |
| 0.7753029732225499 | 0.9572271836739349 | 0.5568717681885788 |
| 0.4450105203498563 | 0.2849386062965762 | 0.3911034517592686 |
| 0.1196451313068520 | 0.6287115921229648 | 0.7294269706138901 |
| 0.1402021152891653 | 0.1451758859778227 | 0.3321044939381730 |
| 0.8097843203408246 | 0.4834472767331102 | 0.6756958637539231 |
| 0.5997593847545812 | 0.6233068910548684 | 0.3203047403531720 |
| 0.2568640870060628 | 0.9538196378723222 | 0.6527587083588652 |
| 0.9251621150110317 | 0.2902363093105721 | 0.4950347053334829 |
| 0.4730201461857126 | 0.8093628714048825 | 0.5116917787553344 |
| 0.3550023751620718 | 0.8943767626934456 | 0.3311518917433670 |

|                    |                    |                    |
|--------------------|--------------------|--------------------|
| 0.0181932365610049 | 0.2296698197177605 | 0.6737860244828277 |
| 0.8769049339568002 | 0.8754125154025275 | 0.3210641063610745 |
| 0.5445644259558206 | 0.2007200820567762 | 0.6521390298133182 |
| 0.2090452167361175 | 0.5341673338312201 | 0.4937048922067064 |
| 0.6882220916323778 | 0.5600357158135364 | 0.5136838187393538 |
| 0.6049874028666551 | 0.3595696153940726 | 0.3342192581730445 |
| 0.2701450759923691 | 0.6854459858469815 | 0.6753098676977631 |
| 0.6254154161861333 | 0.9016515845931040 | 0.3195257587896241 |
| 0.2990779312662527 | 0.2433893666593894 | 0.6515752708119280 |
| 0.9651140489193435 | 0.5742682220572368 | 0.4956426483469257 |
| 0.9411679990044122 | 0.0297619535244233 | 0.5120123945433075 |
| 0.9307741079908782 | 0.7887713283245728 | 0.4873598939403863 |
| 0.4750683296681763 | 0.3095677434730814 | 0.5084497145516824 |
| 0.1449496695414462 | 0.6453100402576770 | 0.3467897342425422 |
| 0.8007485529275795 | 0.9746593591383086 | 0.6765606912427712 |
| 0.5884445951425450 | 0.1190390594880273 | 0.3254011553103726 |
| 0.2591666639869827 | 0.4523915482735112 | 0.6620603958747093 |
| 0.7112634186556233 | 0.0413814189959820 | 0.4862440716569385 |
| 0.1907333861958246 | 0.0638262137501547 | 0.5038151527721211 |
| 0.8544918808103791 | 0.3996084563872668 | 0.3471845151544163 |
| 0.5162727290312656 | 0.7328337890293548 | 0.6795937491816738 |
| 0.3819337246219920 | 0.3690507263349180 | 0.3264740045015934 |
| 0.0454064065513269 | 0.7048927731055025 | 0.6659458036385079 |
| 0.4593832374709356 | 0.5721918642010516 | 0.4856998506451393 |
| 0.4360703391469462 | 0.0236922327360799 | 0.5052489293908443 |
| 0.1000631356938161 | 0.3548476574652119 | 0.3461666488919735 |
| 0.7697109852024772 | 0.7018610979911549 | 0.6782500214114474 |
| 0.1310993011387139 | 0.9111161059439202 | 0.3252191394862252 |
| 0.7947807068931938 | 0.2419316980594421 | 0.6671778981077949 |
| 0.7003728740229572 | 0.3003988925207056 | 0.5004014818147374 |
| 0.6989646187824328 | 0.7993898392484068 | 0.4986891405543477 |
| 0.1995456747994851 | 0.2986807825732790 | 0.4983493107785939 |
| 0.2015366673501689 | 0.7990598705294270 | 0.5001092599240199 |
| 0.8706952542754062 | 0.1285552899705006 | 0.3341786782962402 |
| 0.5234360057618271 | 0.4841284316571531 | 0.6638093369973871 |
| 0.3718110135050099 | 0.6419900306309478 | 0.3335322984218900 |
| 0.0292416623759186 | 0.9569506431330596 | 0.6646399865697907 |
| 0.3669580378837707 | 0.1330142509583901 | 0.3153715440886587 |
| 0.0323761688636916 | 0.4660837277115379 | 0.6851568602279693 |
| 0.8578038833181456 | 0.6297150982893295 | 0.3356503011211571 |
| 0.5474058243963301 | 0.9719567162435104 | 0.6666484028268147 |
| 0.5897276912817807 | 0.6535901804680645 | 0.8588057790921251 |
| 0.5813281981460795 | 0.6315399964543766 | 0.8968336133130468 |

**The perfect Cu<sub>7</sub>-[TS-2H]\* surface**

| O                   | In | Cu                  | In | H                   |
|---------------------|----|---------------------|----|---------------------|
| 1.000000000000000   |    |                     |    |                     |
| 14.4442996979000000 |    | 0.0000000000000000  |    | 0.0000000000000000  |
| -7.2221498489000000 |    | 12.5091304781999995 |    | 0.0000000000000000  |
| 0.0000000000000000  |    | 0.0000000000000000  |    | 17.9855003356999994 |

| O  | In | Cu | In | H |
|----|----|----|----|---|
| 72 | 27 | 1  | 20 | 2 |

**Direct**

|                    |                    |                    |
|--------------------|--------------------|--------------------|
| 0.8419927928757152 | 0.6137865863218090 | 0.4582011238054740 |
| 0.5160462871786478 | 0.9538739145376901 | 0.2886770296300694 |
| 0.1698748042216418 | 0.2805574585742698 | 0.6183843640805560 |
| 0.7934722638931193 | 0.9624506534208133 | 0.2977054069732121 |
| 0.4686829879671344 | 0.2919832181152953 | 0.6514502548681393 |
| 0.1321843591081051 | 0.6253209399257811 | 0.4693124462347606 |
| 0.3011366245570256 | 0.7326017607959310 | 0.2997609434680625 |
| 0.9773394814542796 | 0.0711444900434487 | 0.6357189331553081 |
| 0.6399472271188918 | 0.4064379717638555 | 0.4681096871843484 |
| 0.5287030392609787 | 0.2105799326792715 | 0.2707293575132743 |
| 0.1843367242435706 | 0.5413770626704416 | 0.6108965236243434 |
| 0.8566142684699881 | 0.8830934912740653 | 0.4416211867080204 |
| 0.8871586958843731 | 0.1307335736215751 | 0.4563836323672893 |
| 0.5471265503581594 | 0.4630772671049940 | 0.2898929447834904 |
| 0.2239211991408742 | 0.7915918818920482 | 0.6214975693828609 |
| 0.5393283477070372 | 0.7324276576542451 | 0.2984597501469899 |
| 0.2056715776396805 | 0.0764724865716741 | 0.6565310593473497 |
| 0.8747230785497596 | 0.4086560066119015 | 0.4695618964112907 |
| 0.7674342890303082 | 0.4699732866286850 | 0.3011213111266022 |
| 0.4375513466006626 | 0.8039029731683285 | 0.6461317883395524 |
| 0.0938185004023516 | 0.1339982868348210 | 0.4637698601823267 |
| 0.2904049366367227 | 0.2198164009339122 | 0.2705061000011827 |
| 0.9589901343251122 | 0.5445710272140388 | 0.6120400608319044 |
| 0.6190982220475266 | 0.8779266213267554 | 0.4399030111842893 |
| 0.3685189542773265 | 0.6579251011534222 | 0.4560174343435892 |
| 0.0370886278820920 | 0.9843481876372963 | 0.2894579002174592 |
| 0.7083402962088111 | 0.3313116589166686 | 0.6218166221662728 |
| 0.7688208009081734 | 0.7081065799407965 | 0.2981190943492371 |
| 0.4239088990298881 | 0.0273403388197589 | 0.6555844861887624 |
| 0.0912641557680149 | 0.3673676797620429 | 0.4685908364072013 |
| 0.0307289007678155 | 0.1996877396249722 | 0.2993778318678975 |
| 0.6891963017644522 | 0.5300752201361003 | 0.6406824726639090 |
| 0.3666578225361105 | 0.8587761231644585 | 0.4687663250635581 |
| 0.2809458313843554 | 0.9712657689748287 | 0.2695656238269883 |
| 0.9554774402314868 | 0.3172802203378009 | 0.6116150848814784 |

|                    |                    |                    |
|--------------------|--------------------|--------------------|
| 0.6276294494508766 | 0.6422542943866321 | 0.4412037244862361 |
| 0.2264230785862406 | 0.3183702942460227 | 0.3784001491616542 |
| 0.8837717305330802 | 0.6511330900910184 | 0.7077559582256937 |
| 0.5583304585469419 | 0.9853184736990928 | 0.5461651933031667 |
| 0.2678281878980462 | 0.9751242137317901 | 0.5318030861207725 |
| 0.9278797590593920 | 0.3073203023497499 | 0.3449101998959239 |
| 0.5981319593861746 | 0.6613429679620711 | 0.7020360359813519 |
| 0.7584955367466987 | 0.1957513010709475 | 0.5354862565099614 |
| 0.4232440335829302 | 0.5298343841130830 | 0.3654086867470613 |
| 0.1006189685483281 | 0.8675132263992901 | 0.6998018283212807 |
| 0.5440034707330247 | 0.7196670902125927 | 0.5544407436253351 |
| 0.2160222262562097 | 0.0595195871672079 | 0.3881184857196110 |
| 0.8707549978801536 | 0.3927255519142324 | 0.7304788009081719 |
| 0.1842611566155535 | 0.8107679577484619 | 0.3799814232001976 |
| 0.8514038873433479 | 0.1372956932722094 | 0.7091616616635595 |
| 0.5113425893163259 | 0.4715202079754415 | 0.5457949017002093 |
| 0.5254760879149578 | 0.1915240319880601 | 0.5313333704599266 |
| 0.1934625543405785 | 0.5226771046944031 | 0.3453654864311801 |
| 0.8630666392726812 | 0.8705856575396551 | 0.7033124945431942 |
| 0.3040893938971524 | 0.4637969415103072 | 0.5337961995385515 |
| 0.9717228374975831 | 0.7943974412012714 | 0.3656154244307706 |
| 0.6334934326840884 | 0.1346538879284597 | 0.7015973380366167 |
| 0.7829050667715094 | 0.7279591624010149 | 0.5590193840570251 |
| 0.4401292009710187 | 0.0548849086387056 | 0.3891786265914760 |
| 0.1119561244456206 | 0.3826317182733808 | 0.7282400909589289 |
| 0.6900965370286393 | 0.2741150532227751 | 0.3800248614433152 |
| 0.3729184314913166 | 0.6188569591677362 | 0.7026057931172422 |
| 0.0293320165413683 | 0.9423962709904304 | 0.5439154010635993 |
| 0.3056815964545522 | 0.2311913350929452 | 0.5303787388078824 |
| 0.9778760169300841 | 0.5731280422859427 | 0.3461628713383921 |
| 0.6317292755001247 | 0.8900903274663324 | 0.6996637413886445 |
| 0.0372506175086062 | 0.7419471070867469 | 0.5358678329973251 |
| 0.7067366818110150 | 0.0794208507615300 | 0.3639286557597326 |
| 0.3628215538674944 | 0.3963629491967844 | 0.7002181857131350 |
| 0.7750869140461346 | 0.9584391417509999 | 0.5576868121629275 |
| 0.4440886795121958 | 0.2849163623568589 | 0.3900983552160229 |
| 0.1201207213791046 | 0.6297920346615036 | 0.7302699849521890 |
| 0.1397470113328337 | 0.1458776714697491 | 0.3320702950729527 |
| 0.8107974298428489 | 0.4848196524472689 | 0.6757534062986396 |
| 0.5991243396493602 | 0.6237449667441338 | 0.3220071712866874 |
| 0.2566826369367297 | 0.9546261093688071 | 0.6532975497992254 |
| 0.9248789022801814 | 0.2914291729215836 | 0.4955736732950973 |
| 0.4729918317372486 | 0.8102424053204842 | 0.5132424386297861 |
| 0.3548858623003604 | 0.8951423270168241 | 0.3316467700047116 |

|                    |                    |                    |
|--------------------|--------------------|--------------------|
| 0.0182672876933354 | 0.2311841514284221 | 0.6740032169760567 |
| 0.8765109676614740 | 0.8762241388178077 | 0.3217403508109933 |
| 0.5448674270522407 | 0.2008950379846166 | 0.6528211361009323 |
| 0.2090291472441597 | 0.5349947890914912 | 0.4944218760509736 |
| 0.6878701156416877 | 0.5601931654046821 | 0.5146956651221343 |
| 0.6049628877775842 | 0.3604174380688895 | 0.3338516377988829 |
| 0.2706114947857080 | 0.6867110404772255 | 0.6760861739029399 |
| 0.6250506075132896 | 0.9022974735084682 | 0.3204847623549357 |
| 0.2951510599331268 | 0.2422825893787735 | 0.6518603568600236 |
| 0.9652231537057824 | 0.5755189527947010 | 0.4959533659862129 |
| 0.9410290654720713 | 0.0308646203000492 | 0.5126310128464017 |
| 0.9305598774740580 | 0.7897503477830470 | 0.4879000964971105 |
| 0.4737882492400591 | 0.3095157202980865 | 0.5066363922663552 |
| 0.1450882816601182 | 0.6462919086151953 | 0.3475429590180803 |
| 0.8014066401614374 | 0.9763740018700930 | 0.6772991456680197 |
| 0.5882380723605609 | 0.1197948621406792 | 0.3256709473347558 |
| 0.2607167197204461 | 0.4543947037242174 | 0.6624478651698108 |
| 0.7110852788142444 | 0.0424577017583193 | 0.4869652039521078 |
| 0.1901302720712083 | 0.0639783479048171 | 0.5035321977471906 |
| 0.8543358662555700 | 0.4006302148152212 | 0.3476983646955937 |
| 0.5177851388930674 | 0.7380224046868116 | 0.6814223831796582 |
| 0.3814407903521354 | 0.3700417668726237 | 0.3263495149478552 |
| 0.0461915754220772 | 0.7060290740580010 | 0.6667490548667319 |
| 0.4596789495924473 | 0.5722711981562222 | 0.4887318061998576 |
| 0.4358482792958034 | 0.0247277385437259 | 0.5053335920784187 |
| 0.0997378456962486 | 0.3557385955081353 | 0.3466641988495046 |
| 0.7725195522689222 | 0.7037686105415043 | 0.6784479846040531 |
| 0.1308202196015288 | 0.9117434448621768 | 0.3254308082781918 |
| 0.7950461266712405 | 0.2433437660590093 | 0.6677842168826502 |
| 0.6999381920626968 | 0.3015401947871376 | 0.5006936729280119 |
| 0.6988819156802156 | 0.8004823651019133 | 0.4996764857856454 |
| 0.1986990469910838 | 0.2990782400434917 | 0.4983870914944952 |
| 0.2015907581657409 | 0.7999266511234289 | 0.5007242652007494 |
| 0.8703094531270374 | 0.1293873895461976 | 0.3348820261497038 |
| 0.5237537625680724 | 0.4675563562732609 | 0.6675142974360314 |
| 0.3720879989703746 | 0.6426440644467144 | 0.3354440892974150 |
| 0.0292186097606699 | 0.9580105332457522 | 0.6652283452582375 |
| 0.3665621775659881 | 0.1336949446943615 | 0.3147036874862640 |
| 0.0331975502769932 | 0.4674471236243175 | 0.6857540654114086 |
| 0.8574487718092307 | 0.6305507027429522 | 0.3363894711287623 |
| 0.5471098883017559 | 0.9738272937044370 | 0.6671988679395338 |
| 0.5806459972420740 | 0.5939126856862457 | 0.7574494845605817 |
| 0.5729868113402190 | 0.5329260739444037 | 0.7802128099039691 |

### The perfect Cu<sub>7</sub>-2H\* surface

O In Cu In H

|                     |                     |                     |  |  |
|---------------------|---------------------|---------------------|--|--|
| 1.000000000000000   |                     |                     |  |  |
| 14.4442996979000000 | 0.0000000000000000  | 0.0000000000000000  |  |  |
| -7.2221498489000000 | 12.5091304781999995 | 0.0000000000000000  |  |  |
| 0.0000000000000000  | 0.0000000000000000  | 17.9855003356999994 |  |  |

|    |    |    |    |   |
|----|----|----|----|---|
| O  | In | Cu | In | H |
| 72 | 27 | 1  | 20 | 2 |

Direct

|                    |                    |                    |
|--------------------|--------------------|--------------------|
| 0.8418416828428583 | 0.6137790938753539 | 0.4581237605032105 |
| 0.5158645526850958 | 0.9532060772298026 | 0.2875904599946147 |
| 0.1657578412056986 | 0.2783112841967070 | 0.6158358794853986 |
| 0.7926611585205113 | 0.9613942080399700 | 0.2967293205341133 |
| 0.4646182891682238 | 0.2868346141711658 | 0.6476051864964987 |
| 0.1321631549707065 | 0.6249034116218608 | 0.4687341350084034 |
| 0.3014696829018259 | 0.7311576974395922 | 0.2997334134688451 |
| 0.9756419233461284 | 0.0693915784785446 | 0.6348733691551908 |
| 0.6387887598479591 | 0.4063152954088249 | 0.4678077438937476 |
| 0.5282624672437821 | 0.2106910000021844 | 0.2707035592221668 |
| 0.1852214489918519 | 0.5409431849736830 | 0.6102665158519911 |
| 0.8560362061507335 | 0.8828306353847949 | 0.4404959042738608 |
| 0.8863180985069136 | 0.1301052945744502 | 0.4554481888516818 |
| 0.5463133858976030 | 0.4620225954474496 | 0.2901406056948119 |
| 0.2238455552128694 | 0.7912831916299270 | 0.6205693330085591 |
| 0.5388903660383223 | 0.7309156132757645 | 0.2988595531125318 |
| 0.2045891511744102 | 0.0757508858034811 | 0.6544380645117180 |
| 0.8741602713492008 | 0.4084163649228068 | 0.4689235706618590 |
| 0.7664166079371932 | 0.4692268381303811 | 0.3012938315450103 |
| 0.4355940818984332 | 0.8058351140514414 | 0.6448596567249998 |
| 0.0923926034456192 | 0.1324574702992164 | 0.4616685415195958 |
| 0.2902457632370973 | 0.2191819393150140 | 0.2702961031670508 |
| 0.9601191202883023 | 0.5449464691539545 | 0.6114261789169618 |
| 0.6189422638491932 | 0.8775411558968097 | 0.4390638913534469 |
| 0.3687535373020809 | 0.6568796805141454 | 0.4566900071192470 |
| 0.0363933202206161 | 0.9832244085176434 | 0.2881805400936358 |
| 0.7077638729302544 | 0.3315699589863911 | 0.6212709636942232 |
| 0.7675573982313422 | 0.7069051266019304 | 0.2987843702919096 |
| 0.4232896438653413 | 0.0270513735256829 | 0.6555729957472186 |
| 0.0901963485000870 | 0.3667314471351497 | 0.4673733818587782 |
| 0.0296233672076663 | 0.1985817588828760 | 0.2979802402499149 |
| 0.6985848250500658 | 0.5357010158505523 | 0.6372621816437920 |
| 0.3664098963922253 | 0.8584798031228175 | 0.4674017309178505 |
| 0.2806380304165577 | 0.9704688354033337 | 0.2684118921004690 |
| 0.9546946961455712 | 0.3169996191270773 | 0.6105302688040278 |

|                    |                    |                    |
|--------------------|--------------------|--------------------|
| 0.6267957944357018 | 0.6405537789764346 | 0.4429033630247273 |
| 0.2248218761090812 | 0.3173961717692157 | 0.3769643466651525 |
| 0.8889412841378833 | 0.6513207517934443 | 0.7115689108971828 |
| 0.5576988229385371 | 0.9851534849485285 | 0.5449113998441918 |
| 0.2679709960530359 | 0.9748688533797905 | 0.5305966927903141 |
| 0.9269692133615417 | 0.3064637317642261 | 0.3438997593271485 |
| 0.6036828459579254 | 0.6758985097578345 | 0.7046658022160974 |
| 0.7578224015244710 | 0.1953761840354522 | 0.5348254374488268 |
| 0.4234299485941538 | 0.5285355603972481 | 0.3674839437465297 |
| 0.1009426334611589 | 0.8676988409368385 | 0.6988251491722243 |
| 0.5443136518374934 | 0.7208259814925518 | 0.5551040986699856 |
| 0.2152488509522769 | 0.0581268743134658 | 0.3870414643866967 |
| 0.8710889065244594 | 0.3921271654425295 | 0.7296850512492646 |
| 0.1838142044203230 | 0.8097044015150628 | 0.3786845344558052 |
| 0.8498833682532775 | 0.1361662948341256 | 0.7075250535359572 |
| 0.5134628482812729 | 0.4721954148673719 | 0.5530725373461072 |
| 0.5256122158474459 | 0.1908258465165130 | 0.5302876712967372 |
| 0.1933612557067521 | 0.5217011319536790 | 0.3456048373895211 |
| 0.8631316927059928 | 0.8699578985053498 | 0.7034403423270309 |
| 0.3029037630988137 | 0.4620508320811199 | 0.5330357923554175 |
| 0.9713940877813441 | 0.7936973563793711 | 0.3646403968153164 |
| 0.6334873195099712 | 0.1358501613550616 | 0.7014842537200496 |
| 0.7853134343530013 | 0.7314268485649780 | 0.5586339176763609 |
| 0.4395015975452351 | 0.0538807797163484 | 0.3876548598381510 |
| 0.1114479564402321 | 0.3817632560386404 | 0.7270984780630173 |
| 0.6895642462218132 | 0.2732912177024396 | 0.3797643543816612 |
| 0.3751685306752486 | 0.6225226471590918 | 0.7019257650801308 |
| 0.0293067202786440 | 0.9422859412832733 | 0.5428105304034505 |
| 0.3036657433612406 | 0.2309223058442497 | 0.5286880119281930 |
| 0.9775567709765806 | 0.5722034035008970 | 0.3455600292480275 |
| 0.6297633269832332 | 0.8928728692485728 | 0.6988623700096486 |
| 0.0375365170460241 | 0.7420212601054937 | 0.5350078382441571 |
| 0.7061541381054427 | 0.0787450381443166 | 0.3629153072712393 |
| 0.3586145825096324 | 0.3935197072499125 | 0.6983363759747259 |
| 0.7742206996753541 | 0.9580311555008409 | 0.5568248730049220 |
| 0.4431217129819131 | 0.2842942851295949 | 0.3915596684240664 |
| 0.1204542663967935 | 0.6289953590286159 | 0.7300301569701454 |
| 0.1388111720350217 | 0.1447232223467677 | 0.3308144869262586 |
| 0.8124627527461720 | 0.4851973980273984 | 0.6755471837332977 |
| 0.5981228860444786 | 0.6219997454232081 | 0.3234905761529723 |
| 0.2565087425793289 | 0.9547377186491872 | 0.6520323536581808 |
| 0.9240536592119015 | 0.2909528834145840 | 0.4944890087001026 |
| 0.4729715714998902 | 0.8100018365856158 | 0.5114785213432577 |
| 0.3544684697320362 | 0.8940187755817978 | 0.3302114718032947 |



|                    |                    |                    |
|--------------------|--------------------|--------------------|
| 0.0166613754734317 | 0.2302592729747782 | 0.6727652558632576 |
| 0.8758298839905578 | 0.8753016384680926 | 0.3208151526931097 |
| 0.5444563932972197 | 0.2004464709994558 | 0.6518570558015788 |
| 0.2087659315994846 | 0.5340841644282444 | 0.4932149630074326 |
| 0.6881090410330608 | 0.5597237699164271 | 0.5162417882289635 |
| 0.6039018361031703 | 0.3597636808666409 | 0.3350960857929703 |
| 0.2696091699081604 | 0.6861348807375544 | 0.6753689078213866 |
| 0.6243956198135018 | 0.9011816424152904 | 0.3195682971795501 |
| 0.2917208976868625 | 0.2416985760083942 | 0.6499707525780218 |
| 0.9651336984796831 | 0.5752973531589566 | 0.4953201190819814 |
| 0.9403168563439438 | 0.0300886092524282 | 0.5113564559515370 |
| 0.9308456476605479 | 0.7898215917156294 | 0.4866337472220905 |
| 0.4734214026076051 | 0.3108368187556937 | 0.5089098354338224 |
| 0.1449172113484873 | 0.6452943530074264 | 0.3468135814423304 |
| 0.8005401570776378 | 0.9754444336036279 | 0.6758612078634454 |
| 0.5879311389398312 | 0.1194170900858668 | 0.3246063988990567 |
| 0.2602906886447240 | 0.4531034908025109 | 0.6607255384719185 |
| 0.7106167529680116 | 0.0423599055845226 | 0.4859411565336604 |
| 0.1897948688004757 | 0.0636651340660034 | 0.5022319494278323 |
| 0.8535276212063931 | 0.3998618336371516 | 0.3470989354009644 |
| 0.5155535754727196 | 0.7439057106315529 | 0.6809831477606157 |
| 0.3809301861024200 | 0.3690407308486247 | 0.3270946572869355 |
| 0.0479877562455728 | 0.7061260290986181 | 0.6663861382268947 |
| 0.4604167635994282 | 0.5705648813597207 | 0.4923112108003231 |
| 0.4356697600992191 | 0.0248607605497744 | 0.5034272539015073 |
| 0.0985466293178912 | 0.3547016448645586 | 0.3454192756779086 |
| 0.7821390965062792 | 0.7045780839892657 | 0.6765616144993455 |
| 0.1304401752879020 | 0.9107330262207231 | 0.3241129147907034 |
| 0.7945244161086685 | 0.2434128763802421 | 0.6663880224354973 |
| 0.6991136448736395 | 0.3014809157359509 | 0.5001752228704133 |
| 0.6986004792198900 | 0.8001634628268185 | 0.4992538743423690 |
| 0.1966285956828602 | 0.2976247674289409 | 0.4966538104729694 |
| 0.2014621057285032 | 0.7995846866336406 | 0.4994082433395532 |
| 0.8695182867811113 | 0.1283590299627373 | 0.3337920694214177 |
| 0.5274593203629460 | 0.4579457702499924 | 0.6782618071598144 |
| 0.3722110919169791 | 0.6410411695882726 | 0.3363588552452937 |
| 0.0296370857463269 | 0.9583524414623027 | 0.6640073234263899 |
| 0.3661088769063018 | 0.1330363235893350 | 0.3144444274702669 |
| 0.0332486762422438 | 0.4666868958708311 | 0.6850776781975485 |
| 0.8567011034756723 | 0.6295867789939896 | 0.3363515331187224 |
| 0.5462690576524614 | 0.9763089466624866 | 0.6656958092610554 |
| 0.5912136676999079 | 0.6590621071845654 | 0.7573504859850114 |
| 0.5757681804847771 | 0.4811996267632131 | 0.7707743547307970 |

**The perfect Pt<sub>7</sub>-[TS-H<sub>2</sub>O]\* surface**

O In Cu In H

|                     |                     |                     |  |  |
|---------------------|---------------------|---------------------|--|--|
| 1.000000000000000   |                     |                     |  |  |
| 14.4442996979000000 | 0.0000000000000000  | 0.0000000000000000  |  |  |
| -7.2221498489000000 | 12.5091304781999995 | 0.0000000000000000  |  |  |
| 0.0000000000000000  | 0.0000000000000000  | 17.9855003356999994 |  |  |

|    |    |    |    |   |
|----|----|----|----|---|
| O  | In | Cu | In | H |
| 72 | 27 | 1  | 20 | 2 |

Direct

|                    |                    |                    |
|--------------------|--------------------|--------------------|
| 0.8413806474620340 | 0.6125932851533947 | 0.4574832186560920 |
| 0.5155240059486882 | 0.9520153462886651 | 0.2880222084792754 |
| 0.1670055507328588 | 0.2778554271957606 | 0.6165990060561115 |
| 0.7923808840796992 | 0.9603469391667372 | 0.2973506885774322 |
| 0.4645491661871581 | 0.2852662495842507 | 0.6566078059230696 |
| 0.1327002992682742 | 0.6239775371090409 | 0.4685501830571325 |
| 0.3014238971291454 | 0.7305935669713587 | 0.2998839110087475 |
| 0.9755434306422028 | 0.0685349111445496 | 0.6350565475694525 |
| 0.6390580084936645 | 0.4049993326629387 | 0.4659025191242544 |
| 0.5283133326830255 | 0.2089879456860737 | 0.2689647713593333 |
| 0.1846238411435820 | 0.5398814681516650 | 0.6105173554262509 |
| 0.8552269824092157 | 0.8810701884806179 | 0.4412183388695136 |
| 0.8862056725300371 | 0.1286939957398301 | 0.4558531291263924 |
| 0.5462900627376311 | 0.4616182430883693 | 0.2888636083779518 |
| 0.2219827836475438 | 0.7899953627101263 | 0.6204089540369934 |
| 0.5388083874451475 | 0.7302664488270579 | 0.2990328814683257 |
| 0.2035778152202345 | 0.0736223287744926 | 0.6543371448521815 |
| 0.8737321966637819 | 0.4072517591538188 | 0.4687184354387900 |
| 0.7672576057855840 | 0.4684013530776676 | 0.2997665661457160 |
| 0.4338916417382511 | 0.8072865175567802 | 0.6415378518577503 |
| 0.0930504542467665 | 0.1321560615979801 | 0.4626960026543629 |
| 0.2893560957795728 | 0.2182727294714975 | 0.2691965457003675 |
| 0.9605926410588339 | 0.5437792680442397 | 0.6105981231009616 |
| 0.6179488421971979 | 0.8755980803970366 | 0.4403090640928315 |
| 0.3691307784400097 | 0.6561109147034376 | 0.4571098978882186 |
| 0.0360773167344392 | 0.9826171615836919 | 0.2887598655294242 |
| 0.7075944208111875 | 0.3302519766384422 | 0.6203802613862273 |
| 0.7672500543880858 | 0.7059648327237124 | 0.2985262319535116 |
| 0.4225933943796561 | 0.0275613473807695 | 0.6556723099851390 |
| 0.0910507590478455 | 0.3661950757801805 | 0.4677623868353494 |
| 0.0298570772691522 | 0.1979830600910916 | 0.2986291936980340 |
| 0.6975071155304016 | 0.5326506812049465 | 0.6385883905459232 |
| 0.3664051467148910 | 0.8577094673527051 | 0.4669756068147217 |
| 0.2803238194068212 | 0.9693380437741389 | 0.2683399560199232 |
| 0.9551975419027443 | 0.3157463121858667 | 0.6103253938983116 |

|                    |                    |                    |
|--------------------|--------------------|--------------------|
| 0.6267490652023266 | 0.6394000712248791 | 0.4429379695350560 |
| 0.2256782917401443 | 0.3164617754508373 | 0.3776941506431608 |
| 0.8895648394773245 | 0.6485766947385065 | 0.7117375447242491 |
| 0.5578322231749090 | 0.9863492505368703 | 0.5442818086186146 |
| 0.2675643540530468 | 0.9737874918784531 | 0.5304971375024319 |
| 0.9271655865030102 | 0.3054299930771122 | 0.3449917925511735 |
| 0.6074135810711608 | 0.6911550348006068 | 0.7223772514148957 |
| 0.7580685681618384 | 0.1947896411039755 | 0.5344882649796689 |
| 0.4233622170958765 | 0.5276706442593433 | 0.3669547359965737 |
| 0.0996099844198616 | 0.8659600134919405 | 0.6989307047319597 |
| 0.5445511436444143 | 0.7178041771526197 | 0.5570445171137328 |
| 0.2155621834046901 | 0.0579092266017043 | 0.3870055878299078 |
| 0.8713706503839554 | 0.3904630465669982 | 0.7291978943242785 |
| 0.1832411761896122 | 0.8087979153314018 | 0.3785865879783115 |
| 0.8513924240955675 | 0.1363558148609317 | 0.7085283123525239 |
| 0.5120998171688481 | 0.4673484814404529 | 0.5495374499196005 |
| 0.5238411933710808 | 0.1911476467270029 | 0.5306319076347848 |
| 0.1935505433268752 | 0.5208597263339905 | 0.3447861647283965 |
| 0.8627488482111555 | 0.8689483438836335 | 0.7039364629604301 |
| 0.3039969489063178 | 0.4616767807870464 | 0.5342466412157819 |
| 0.9709125334267052 | 0.7927302767968061 | 0.3642484358400239 |
| 0.6337231532602744 | 0.1351720231290233 | 0.7011776133956571 |
| 0.7845556091074030 | 0.7283121577798601 | 0.5592653619035405 |
| 0.4395447932915412 | 0.0541012217116807 | 0.3874881784605169 |
| 0.1118506492320852 | 0.3810160344119102 | 0.7278017564576997 |
| 0.6892626209650393 | 0.2722903129758589 | 0.3787680435134300 |
| 0.3723560706028278 | 0.6217318455950276 | 0.7044132541226656 |
| 0.0287142064155823 | 0.9408659948761379 | 0.5428793102407632 |
| 0.3054208553068259 | 0.2297516768857939 | 0.5299046150021708 |
| 0.9774568407853109 | 0.5713451393204332 | 0.3464302820127361 |
| 0.6304472455564257 | 0.8965070519197237 | 0.7015091628569061 |
| 0.0369270796226529 | 0.7406194693246614 | 0.5342161308972558 |
| 0.7059174961673685 | 0.0774476363815896 | 0.3633424347005141 |
| 0.3566069927285105 | 0.3894511774486614 | 0.7013846312798035 |
| 0.7737623884413568 | 0.9567949488852570 | 0.5575387759502588 |
| 0.4430818586072370 | 0.2828974023625201 | 0.3880973309420846 |
| 0.1203580633398061 | 0.6279265378560833 | 0.7299839312997251 |
| 0.1389874598401186 | 0.1441362264110654 | 0.3312402952206189 |
| 0.8134012361613306 | 0.4828715549242616 | 0.6743968246186548 |
| 0.5980322428346828 | 0.6213950581991713 | 0.3233269629459621 |
| 0.2556780969976123 | 0.9530635219213860 | 0.6520870321017530 |
| 0.9243943268745064 | 0.2901900965989300 | 0.4942995219049677 |
| 0.4720327763758544 | 0.8085386372345299 | 0.5139805740034863 |
| 0.3542858935354209 | 0.8932105642870702 | 0.3309964969540540 |

|                    |                    |                    |
|--------------------|--------------------|--------------------|
| 0.0177834004422989 | 0.2299410797835044 | 0.6730437724620874 |
| 0.8754702197542620 | 0.8743455324255109 | 0.3212467983792793 |
| 0.5449273812484428 | 0.1998900849761198 | 0.6521552636783216 |
| 0.2091875488003016 | 0.5333726891903806 | 0.4943858797425292 |
| 0.6881258786770169 | 0.5577133326830533 | 0.5152947772879883 |
| 0.6044001568702170 | 0.3588226114336738 | 0.3319741300248589 |
| 0.2702353772096419 | 0.6860783543006761 | 0.6752360271346323 |
| 0.6239930909202924 | 0.9001088814134903 | 0.3206800868605527 |
| 0.2905140185616783 | 0.2389199190946484 | 0.6512922548431550 |
| 0.9653876395616350 | 0.5743754067403780 | 0.4944273375810616 |
| 0.9402390591450616 | 0.0290901627075374 | 0.5118731983512153 |
| 0.9306532005965703 | 0.7886244919170367 | 0.4863715751716553 |
| 0.4726381213603879 | 0.3085093814390962 | 0.5039287976401067 |
| 0.1449829571952835 | 0.6443098783080444 | 0.3468829063784022 |
| 0.8002193282912541 | 0.9755729949355482 | 0.6764247294530339 |
| 0.5876963743493880 | 0.1181349524416108 | 0.3243161358578153 |
| 0.2622528750261092 | 0.4550074302704326 | 0.6636312103268911 |
| 0.7101543456765445 | 0.0410849826628805 | 0.4862473552671190 |
| 0.1896038114441607 | 0.0625176178001257 | 0.5024502785597078 |
| 0.8536266339737841 | 0.3988503080982207 | 0.3470120998737903 |
| 0.5161759527647981 | 0.7487236922719694 | 0.6851024923589981 |
| 0.3804773098410957 | 0.3685964699506816 | 0.3253351531211155 |
| 0.0488051463792126 | 0.7048132857382824 | 0.6660262134794698 |
| 0.4602651600317998 | 0.5699109260842857 | 0.4917484445206236 |
| 0.4351748449653312 | 0.0241294962629043 | 0.5032328335422088 |
| 0.0992304560249359 | 0.3540453625845409 | 0.3460309728757109 |
| 0.7858469995664721 | 0.7038473383017818 | 0.6768197044590515 |
| 0.1302381522232028 | 0.9101381870799882 | 0.3242593540135029 |
| 0.7948337714385689 | 0.2416793664596121 | 0.6660222494737583 |
| 0.6988798530787954 | 0.3001873698030131 | 0.4994820041734335 |
| 0.6978347120645838 | 0.7985805303646228 | 0.5003949908100880 |
| 0.1977219879942013 | 0.2974600486317545 | 0.4977277854422550 |
| 0.2014244679314043 | 0.7986449073870873 | 0.4993167097166186 |
| 0.8695239013994553 | 0.1272943033367163 | 0.3343434086447697 |
| 0.5228044859749842 | 0.4531644557218532 | 0.6725031959528432 |
| 0.3721440092259492 | 0.6406161110501104 | 0.3365654521493207 |
| 0.0292336141698276 | 0.9573106482704731 | 0.6641843838739877 |
| 0.3658070023353583 | 0.1320200818725996 | 0.3129101626745981 |
| 0.0340268637926377 | 0.4658834462434466 | 0.6848660360812276 |
| 0.8564324790181743 | 0.6286218417543427 | 0.3358396087985442 |
| 0.5442654592531118 | 0.9756589061477375 | 0.6651827172825120 |
| 0.6250800618507293 | 0.7181485469802340 | 0.7732968772775044 |
| 0.5748519091911725 | 0.5700698121599534 | 0.7347819203898543 |

### The perfect Cu<sub>7</sub>-H<sub>2</sub>O\* surface

O In Cu In H

|                     |                     |                     |  |  |
|---------------------|---------------------|---------------------|--|--|
| 1.000000000000000   |                     |                     |  |  |
| 14.4442996979000000 | 0.0000000000000000  | 0.0000000000000000  |  |  |
| -7.2221498489000000 | 12.5091304781999995 | 0.0000000000000000  |  |  |
| 0.0000000000000000  | 0.0000000000000000  | 17.9855003356999994 |  |  |

|    |    |    |    |   |
|----|----|----|----|---|
| O  | In | Cu | In | H |
| 72 | 27 | 1  | 20 | 2 |

Direct

|                    |                    |                    |
|--------------------|--------------------|--------------------|
| 0.8402645459596637 | 0.6121674034952533 | 0.4554677132833677 |
| 0.5148999128604910 | 0.9515089773220440 | 0.2884454354838392 |
| 0.1725528652770516 | 0.2803794962930897 | 0.6189983781180989 |
| 0.7920003000780977 | 0.9598099706561209 | 0.2982725539961686 |
| 0.4611706944827871 | 0.2784958004167338 | 0.6616016926536398 |
| 0.1318357557340497 | 0.6239673895191847 | 0.4676909975836163 |
| 0.2997185309171763 | 0.7299037500041737 | 0.2986930150763254 |
| 0.9766621644881134 | 0.0705890520150494 | 0.6336156116243057 |
| 0.6403868738498155 | 0.4055000303529128 | 0.4663076310572873 |
| 0.5285852640957034 | 0.2077797124965710 | 0.2657939991841047 |
| 0.1821421738746385 | 0.5383688308543534 | 0.6080252791189540 |
| 0.8533229042315285 | 0.8781250143945942 | 0.4426741879937347 |
| 0.8855630416161837 | 0.1280339509644521 | 0.4556813975000290 |
| 0.5462665124141003 | 0.4621706275034005 | 0.2864081259306277 |
| 0.2160354293694292 | 0.7880555969079367 | 0.6185070715710451 |
| 0.5380956889759021 | 0.7305567882305891 | 0.2973693522961290 |
| 0.2036144712991273 | 0.0734872195294623 | 0.6551941418108305 |
| 0.8732737680743088 | 0.4063256033790673 | 0.4680155890125661 |
| 0.7676384556486070 | 0.4680794669227155 | 0.2975504740168771 |
| 0.4232844055820550 | 0.8094040486094617 | 0.6315168369173983 |
| 0.0941046928432007 | 0.1331441932273010 | 0.4636188454694385 |
| 0.2891780160918863 | 0.2182155562041815 | 0.2671500361052608 |
| 0.9555357894934129 | 0.5406000268604069 | 0.6100672513914012 |
| 0.6164381013628742 | 0.8734699266426562 | 0.4408803063066303 |
| 0.3698366797380977 | 0.6565775506158392 | 0.4559635083157390 |
| 0.0353740402889839 | 0.9828143242457927 | 0.2889071367212976 |
| 0.7038860842479105 | 0.3320506667395710 | 0.6214227405810381 |
| 0.7669213151236012 | 0.7056648163110896 | 0.2974350689018567 |
| 0.4212384239710747 | 0.0251491070029307 | 0.6561003227360214 |
| 0.0914943935988766 | 0.3643716310407458 | 0.4679443038955545 |
| 0.0299622209524433 | 0.1978423419206576 | 0.2984968638190039 |
| 0.6834062662849814 | 0.5337866803652263 | 0.6631889301856848 |
| 0.3651061899141246 | 0.8585818457926720 | 0.4626464181211977 |
| 0.2796731074794247 | 0.9685648982884643 | 0.2674239733066066 |
| 0.9556832197138800 | 0.3142021335383594 | 0.6100754874110735 |

|                    |                    |                    |
|--------------------|--------------------|--------------------|
| 0.6255603439492297 | 0.6415755810005076 | 0.4409102269409893 |
| 0.2267034822529334 | 0.3160412224529132 | 0.3773285584572493 |
| 0.8898481432278266 | 0.6446891846772032 | 0.7118558955175089 |
| 0.5582407045977563 | 0.9875558931123811 | 0.5427020957382463 |
| 0.2674542794948512 | 0.9739603491330302 | 0.5300140756299042 |
| 0.9271272262592648 | 0.3049528639277416 | 0.3453081347947130 |
| 0.6653229072284470 | 0.7088246071131028 | 0.7695732506875569 |
| 0.7585488732805024 | 0.1958496815597929 | 0.5351749524641072 |
| 0.4231106246239970 | 0.5277631311766970 | 0.3648727521437645 |
| 0.0969571196495562 | 0.8644455761046161 | 0.6978267813790472 |
| 0.5435006876029153 | 0.7148497891596339 | 0.5594955215498217 |
| 0.2160326449385070 | 0.0589222757879850 | 0.3859542041234896 |
| 0.8704464168144032 | 0.3868672132626556 | 0.7292183154904280 |
| 0.1810617852641232 | 0.8082436113849927 | 0.3775407712373906 |
| 0.8529368474481115 | 0.1365510019928736 | 0.7100717366961821 |
| 0.5146926412856292 | 0.4668017566382894 | 0.5450548918021425 |
| 0.5239865542094631 | 0.1910336557768852 | 0.5301469529837352 |
| 0.1933270708497080 | 0.5205598664122524 | 0.3468127614064001 |
| 0.8643562671773323 | 0.8710298122050695 | 0.7013320035124593 |
| 0.3051200786121578 | 0.4620927052035859 | 0.5334943774009772 |
| 0.9700170807473611 | 0.7927131124555648 | 0.3635303329755298 |
| 0.6335793235831501 | 0.1298069195107788 | 0.6981741195063443 |
| 0.7798890581075737 | 0.7190481494599821 | 0.5620631951216267 |
| 0.4393470752513460 | 0.0561729465721185 | 0.3865008176459702 |
| 0.1122158228599061 | 0.3808019100809142 | 0.7275324026148130 |
| 0.6881027627845742 | 0.2726320705451344 | 0.3779962229979972 |
| 0.3674494618428172 | 0.6168223921499049 | 0.7038749161621590 |
| 0.0283977946327969 | 0.9405354824027596 | 0.5420231201193726 |
| 0.3077916680129156 | 0.2303911168969384 | 0.5299835484331806 |
| 0.9763626726374689 | 0.5705355783443771 | 0.3457808635480553 |
| 0.6295280753831007 | 0.8853870309884243 | 0.7011148435957834 |
| 0.0344117375741911 | 0.7386696548635551 | 0.5329699573239584 |
| 0.7054701597317231 | 0.0772006160376068 | 0.3636154805378041 |
| 0.3666804128800632 | 0.3973377298420394 | 0.7007691960610661 |
| 0.7734851991506267 | 0.9568276222203995 | 0.5572014945731658 |
| 0.4447427413906438 | 0.2834429790922341 | 0.3840169962187944 |
| 0.1191316834580885 | 0.6261757699110386 | 0.7281209492096096 |
| 0.1395255109243571 | 0.1444475055968611 | 0.3303643721280911 |
| 0.8106099556198070 | 0.4794382998033222 | 0.6780941021998390 |
| 0.5976340470315028 | 0.6221809484364088 | 0.3205497987291573 |
| 0.2545900968281583 | 0.9514175596363262 | 0.6520300253071007 |
| 0.9247442782730892 | 0.2898275313699387 | 0.4939963922977036 |
| 0.4693760395329297 | 0.8088878549352078 | 0.5129696449206621 |
| 0.3535954517389394 | 0.8929122925370243 | 0.3312512184504863 |

|                    |                    |                    |
|--------------------|--------------------|--------------------|
| 0.0190250664808052 | 0.2298670866632403 | 0.6736742856510256 |
| 0.8748333309821306 | 0.8737193745014570 | 0.3215926452796377 |
| 0.5430265929309380 | 0.1945966473174955 | 0.6520883908226829 |
| 0.2085356563941560 | 0.5329443148439436 | 0.4923651176503349 |
| 0.6870957083778580 | 0.5595608368810753 | 0.5095497084129926 |
| 0.6046735453970807 | 0.3582024413196223 | 0.3265632853039460 |
| 0.2688478429891453 | 0.6857435801594211 | 0.6720749561441766 |
| 0.6233697248310442 | 0.8997130617512151 | 0.3211232747941558 |
| 0.2924714954284174 | 0.2385467590396170 | 0.6522059989886536 |
| 0.9642264208633665 | 0.5731117377157618 | 0.4939025550203271 |
| 0.9403028903825815 | 0.0292219325268668 | 0.5116571322958533 |
| 0.9297463238263733 | 0.7875932133564555 | 0.4860873679581011 |
| 0.4725584760822437 | 0.3051488844353986 | 0.4987684400052129 |
| 0.1438934338757901 | 0.6441904797405210 | 0.3461718639267111 |
| 0.7989111895756367 | 0.9766611153134686 | 0.6760459774440145 |
| 0.5872735502194787 | 0.1177868653696840 | 0.3238621801820311 |
| 0.2616956837862231 | 0.4558193173548143 | 0.6630318430545805 |
| 0.7094848557399376 | 0.0411019590788354 | 0.4859350897160531 |
| 0.1898303041063436 | 0.0623422004631773 | 0.5015583045173001 |
| 0.8529906050978605 | 0.3979976024407614 | 0.3463131462741357 |
| 0.5054869553232346 | 0.7358574008025806 | 0.6750657600695373 |
| 0.3802451836007750 | 0.3689254491558399 | 0.3227311078310009 |
| 0.0479552101900994 | 0.7032083749096578 | 0.6641650126730039 |
| 0.4592548479733320 | 0.5706363696042489 | 0.4892063367768735 |
| 0.4347598291580309 | 0.0236286609685909 | 0.5021930765193402 |
| 0.0994718257439460 | 0.3534065999677256 | 0.3461321784935689 |
| 0.7911427556786071 | 0.7056783966133876 | 0.6819119525392571 |
| 0.1296963211274975 | 0.9103536173700721 | 0.3234601969314266 |
| 0.7945996718912344 | 0.2390275654892063 | 0.6657621624762343 |
| 0.6993812222686486 | 0.3004218219860860 | 0.4996039305226671 |
| 0.6967783257433602 | 0.7983043566002972 | 0.5020261812833844 |
| 0.1995048151762092 | 0.2978364348772253 | 0.4979671906662655 |
| 0.2001995608246539 | 0.7987230499208136 | 0.4980331380277133 |
| 0.8693249211675025 | 0.1270556815441686 | 0.3341288786367420 |
| 0.5193569741492745 | 0.4458302868439126 | 0.6635201339932943 |
| 0.3716807801461218 | 0.6411608317045974 | 0.3350579746862472 |
| 0.0302324960707572 | 0.9590274902464677 | 0.6633112054505463 |
| 0.3656894669668189 | 0.1314402342438489 | 0.3099506344805205 |
| 0.0331865853370398 | 0.4647006833607960 | 0.6834396201639683 |
| 0.8568728765662080 | 0.6286689670537053 | 0.3337419763486639 |
| 0.5425108163201647 | 0.9677431429306171 | 0.6644817989846056 |
| 0.6543074756419677 | 0.7700053102728039 | 0.7615930170398936 |
| 0.5979268981847954 | 0.6515249723280963 | 0.7883213246782067 |

### The perfect Pd<sub>7</sub> doped c-In<sub>2</sub>O<sub>3</sub>(111) surface

O In Pd In

|                     |                     |                     |  |
|---------------------|---------------------|---------------------|--|
| 1.000000000000000   |                     |                     |  |
| 14.4442996979000000 | 0.0000000000000000  | 0.0000000000000000  |  |
| -7.2221498489000000 | 12.5091304781999995 | 0.0000000000000000  |  |
| 0.0000000000000000  | 0.0000000000000000  | 17.9855003356999994 |  |

|    |    |    |    |
|----|----|----|----|
| O  | In | Pd | In |
| 72 | 27 | 1  | 20 |

Direct

|                    |                    |                    |
|--------------------|--------------------|--------------------|
| 0.8414496840590873 | 0.6131472363712041 | 0.4571065592595657 |
| 0.5153198917402106 | 0.9524954601784594 | 0.2893502256114996 |
| 0.1714568606888001 | 0.2797771785224225 | 0.6197908097901589 |
| 0.7931230016350016 | 0.9610678079259036 | 0.2974206160171586 |
| 0.4715561202749758 | 0.2945242358594947 | 0.6502220458335954 |
| 0.1325581323348055 | 0.6250003898321436 | 0.4692060591724548 |
| 0.3007454752717000 | 0.7320709930644462 | 0.2999087513378489 |
| 0.9783920922956295 | 0.0706016628741591 | 0.6357564206947554 |
| 0.6406582951578041 | 0.4061968335957773 | 0.4673667963276326 |
| 0.5284948863008202 | 0.2095669005723362 | 0.2709258714228017 |
| 0.1820875357981748 | 0.5389620573590455 | 0.6101532269378515 |
| 0.8574652396135698 | 0.8825149378959364 | 0.4409433729697823 |
| 0.8875286098829963 | 0.1292887139941218 | 0.4557227705421759 |
| 0.5476744021749367 | 0.4628949075525385 | 0.2901896260245431 |
| 0.2214721299374002 | 0.7899642893304444 | 0.6208693689312590 |
| 0.5390307834452365 | 0.7319486509725033 | 0.2975789594129067 |
| 0.2067330027965862 | 0.0762801666514730 | 0.6537490691945637 |
| 0.8746889799556745 | 0.4077412576085633 | 0.4691757033777401 |
| 0.7677073305439664 | 0.4687405089259907 | 0.3002988717822117 |
| 0.4339685161668693 | 0.8030607071841958 | 0.6448467784169549 |
| 0.0948603247448810 | 0.1344544021398895 | 0.4647938314791429 |
| 0.2903942775792296 | 0.2189415080227836 | 0.2707671691298708 |
| 0.9581236430154595 | 0.5436574135595545 | 0.6111607142961958 |
| 0.6179919941493602 | 0.8746850943260960 | 0.4406160739634160 |
| 0.3708937486011245 | 0.6581170946907086 | 0.4563256942115484 |
| 0.0372690599400331 | 0.9844013140066858 | 0.2897657836083568 |
| 0.7093944108683017 | 0.3291049061612832 | 0.6207602575712615 |
| 0.7681110485247682 | 0.7069696051204485 | 0.2980179444787331 |
| 0.4242309404038303 | 0.0270604204005749 | 0.6526158927628039 |
| 0.0916789914122363 | 0.3661072880686372 | 0.4689652281121713 |
| 0.0313503254293006 | 0.1992812138200663 | 0.2995115543235707 |
| 0.6895607306049764 | 0.5248166709063200 | 0.6389343213198974 |
| 0.3657212885842114 | 0.8585880736000048 | 0.4677067724681159 |
| 0.2810309274039954 | 0.9710092975313829 | 0.2703612854005742 |
| 0.9553896069290737 | 0.3156667371647141 | 0.6107162291624841 |



|                    |                    |                    |
|--------------------|--------------------|--------------------|
| 0.6261258070207288 | 0.6441224138846549 | 0.4417565834139598 |
| 0.2272849768899824 | 0.3180921085549295 | 0.3789512834200188 |
| 0.8833173118123232 | 0.6494784308203646 | 0.7083047634091070 |
| 0.5584929028604722 | 0.9845733728259026 | 0.5451856288031032 |
| 0.2671656930273477 | 0.9737644009926667 | 0.5312063625190554 |
| 0.9281457983831161 | 0.3061434927594707 | 0.3459267810829057 |
| 0.6008451562902586 | 0.6448458652301097 | 0.7006522167762879 |
| 0.7587389511871813 | 0.1942431093524113 | 0.5344727587278405 |
| 0.4230034549419185 | 0.5294199951718320 | 0.3643292816812975 |
| 0.1011117218350960 | 0.8672026101236592 | 0.7000009732649778 |
| 0.5436742158758766 | 0.7202369995170729 | 0.5577086344514814 |
| 0.2157843553664917 | 0.0591832863586431 | 0.3891083647494924 |
| 0.8700694702135271 | 0.3912501888914030 | 0.7298890684834306 |
| 0.1831619665076580 | 0.8097253592656607 | 0.3798024601472179 |
| 0.8529731661645105 | 0.1378564689087657 | 0.7098895415768499 |
| 0.5119043295743734 | 0.4725004239748074 | 0.5438377105968724 |
| 0.5261948759252371 | 0.1914533958522141 | 0.5306542694774735 |
| 0.1940229047226954 | 0.5222610678980645 | 0.3468109973860364 |
| 0.8630496314248290 | 0.8688438009841680 | 0.7025703577403990 |
| 0.3042951694834822 | 0.4637927700861780 | 0.5340517612980650 |
| 0.9712400248302210 | 0.7931506700880760 | 0.3642776780830458 |
| 0.6330334377137129 | 0.1338846945085075 | 0.7012834982629530 |
| 0.7827391350106127 | 0.7266092476049825 | 0.5588089166871356 |
| 0.4402584880478769 | 0.0546368576985829 | 0.3897559782346277 |
| 0.1096098855514422 | 0.3807702254251154 | 0.7287893746039159 |
| 0.6904021004705065 | 0.2729992663641219 | 0.3795790583574065 |
| 0.3648102874343614 | 0.6102093394114982 | 0.7038523282263706 |
| 0.0291477740611932 | 0.9413607099048439 | 0.5435700815595402 |
| 0.3071221251739516 | 0.2321730312533589 | 0.5304536592168244 |
| 0.9777067918244700 | 0.5719044499991233 | 0.3465896207693776 |
| 0.6373906163619552 | 0.8946374961031255 | 0.6971145169409847 |
| 0.0361340305462505 | 0.7407566856635804 | 0.5350196719102470 |
| 0.7064148276213508 | 0.0772793601545581 | 0.3638949957836969 |
| 0.3656585099143046 | 0.3973381576487968 | 0.7011274905996870 |
| 0.7765665920520100 | 0.9579884470630294 | 0.5570206381018383 |
| 0.4446307878258267 | 0.2847490211261628 | 0.3902107503765049 |
| 0.1179499756857681 | 0.6278860033229237 | 0.7298980534411010 |
| 0.1402338344791539 | 0.1455468418182551 | 0.3329459906279131 |
| 0.8102303405948583 | 0.4829034272517335 | 0.6749927767037162 |
| 0.5989452387646089 | 0.6236161311156403 | 0.3215664255215296 |
| 0.2567554166634798 | 0.9534094443770902 | 0.6526754169012821 |
| 0.9248322898433912 | 0.2901968515229911 | 0.4947348280903364 |
| 0.4716188721611377 | 0.8109607692919258 | 0.5129670385783095 |
| 0.3544391851001699 | 0.8946548435334640 | 0.3326960639008269 |

|                    |                    |                    |
|--------------------|--------------------|--------------------|
| 0.0180971140065188 | 0.2302351926104197 | 0.6743254717339658 |
| 0.8766288782536532 | 0.8752822433342130 | 0.3210823359170326 |
| 0.5458211459966053 | 0.2016033932685445 | 0.6523016997003224 |
| 0.2087656962648582 | 0.5341605537556873 | 0.4942154346856180 |
| 0.6884566441463216 | 0.5596509934968810 | 0.5144175542847771 |
| 0.6052462852768310 | 0.3596117108076459 | 0.3337728883195450 |
| 0.2674635636937073 | 0.6843853089987609 | 0.6750532125949854 |
| 0.6247762850580286 | 0.9012319231397511 | 0.3206244470970658 |
| 0.2992461352238168 | 0.2430735573505220 | 0.6522364243576760 |
| 0.9649274403752887 | 0.5746586237432446 | 0.4951397792507010 |
| 0.9419872743611519 | 0.0304385046356847 | 0.5123256788683775 |
| 0.9304602629715051 | 0.7889508954508891 | 0.4871074403277121 |
| 0.4750683562834502 | 0.3097229986321133 | 0.5069852508006591 |
| 0.1448856427302692 | 0.6457232725372093 | 0.3476127381061184 |
| 0.8044879071602745 | 0.9775876815894973 | 0.6772826701112573 |
| 0.5877968002957666 | 0.1185401339606709 | 0.3259486525087552 |
| 0.2571275662847218 | 0.4499335438712635 | 0.6636212444760196 |
| 0.7113997031640567 | 0.0410855632412339 | 0.4866974689887724 |
| 0.1908343582472193 | 0.0643263241353164 | 0.5050404724582592 |
| 0.8543449689597701 | 0.3993804735821646 | 0.3475244060210597 |
| 0.5167508738798279 | 0.7292519878045234 | 0.6786823179670500 |
| 0.3817262153030632 | 0.3692026972237599 | 0.3261304956194194 |
| 0.0448401366413861 | 0.7048461744127531 | 0.6664835824159316 |
| 0.4584919860244515 | 0.5703673533644910 | 0.4871240915194762 |
| 0.4355473097665226 | 0.0245830243023342 | 0.5061660557280496 |
| 0.1004515778165919 | 0.3549892282093251 | 0.3472868033392123 |
| 0.7708650827250368 | 0.7004558614993935 | 0.6793325447892790 |
| 0.1308033672235836 | 0.9117151617590045 | 0.3257329535610060 |
| 0.7950158665775682 | 0.2417320480274095 | 0.6671767787599864 |
| 0.7001857739495435 | 0.3004364967856838 | 0.5001768470658335 |
| 0.7010635220263377 | 0.8010457577134020 | 0.5001444174761792 |
| 0.1997622876173175 | 0.2990156573427787 | 0.4991679456992457 |
| 0.2005836148577295 | 0.7993815875075476 | 0.5003642354135062 |
| 0.8705724917462093 | 0.1280740004009554 | 0.3346211702901023 |
| 0.5254745187679331 | 0.4776493791129298 | 0.6653077195969143 |
| 0.3721710543750835 | 0.6426548872353151 | 0.3349330396400157 |
| 0.0288942875445949 | 0.9561794641270742 | 0.6648638240426621 |
| 0.3666499782824368 | 0.1331614841324435 | 0.3156660171240032 |
| 0.0316405170090939 | 0.4658111020349946 | 0.6847930479080605 |
| 0.8571267687292962 | 0.6292986427553335 | 0.3355828019522579 |
| 0.5481361988778339 | 0.9732076676120961 | 0.6663827206524839 |

### The perfect Pd<sub>7</sub>-O<sub>V6</sub> surface

O In Pd In

|                     |                     |                     |  |
|---------------------|---------------------|---------------------|--|
| 1.000000000000000   |                     |                     |  |
| 14.4442996979000000 | 0.0000000000000000  | 0.0000000000000000  |  |
| -7.2221498489000000 | 12.5091304781999995 | 0.0000000000000000  |  |
| 0.0000000000000000  | 0.0000000000000000  | 17.9855003356999994 |  |

|    |    |    |    |
|----|----|----|----|
| O  | In | Pd | In |
| 71 | 27 | 1  | 20 |

Direct

|                    |                    |                    |
|--------------------|--------------------|--------------------|
| 0.8443920444693436 | 0.6132218810735329 | 0.4537082665313295 |
| 0.5165044612600344 | 0.9529523409607829 | 0.2882046890772406 |
| 0.1710597854597324 | 0.2808156436460987 | 0.6191047227891339 |
| 0.7930846360119497 | 0.9609901799542456 | 0.2992877637273895 |
| 0.4623188105716035 | 0.2842179357795486 | 0.6584371778025704 |
| 0.1328615430405683 | 0.6246881861065289 | 0.4679037015370818 |
| 0.3017174254822422 | 0.7314807780193376 | 0.2988420360130019 |
| 0.9760924496216750 | 0.0693601590068568 | 0.6363594922038096 |
| 0.6402997615411482 | 0.4053719571823184 | 0.4632029490237568 |
| 0.5289951504868465 | 0.2086292863797967 | 0.2672553204170762 |
| 0.1842284223399401 | 0.5406118320384266 | 0.6091084478076495 |
| 0.8552903650874093 | 0.8789879144459237 | 0.4430079009774073 |
| 0.8859828367285316 | 0.1287007931469469 | 0.4572421951057719 |
| 0.5470320569386113 | 0.4626792536354171 | 0.2866475949476988 |
| 0.2214863052644255 | 0.7912800016935371 | 0.6202174036654868 |
| 0.5395459033723971 | 0.7319711648549917 | 0.2971067556290130 |
| 0.2049877495167817 | 0.0757651307604354 | 0.6589197705773723 |
| 0.8745551382763428 | 0.4069794523614577 | 0.4673810915709040 |
| 0.7684126268227738 | 0.4687848472362953 | 0.2978380205821809 |
| 0.4287473533956928 | 0.8074460935000958 | 0.6407355058146647 |
| 0.0941482636279556 | 0.1334203505134710 | 0.4645699856486224 |
| 0.2899906136538822 | 0.2192987635634064 | 0.2672614927208375 |
| 0.9564218597506295 | 0.5404490953049869 | 0.6102334029312917 |
| 0.6181886046627422 | 0.8759463319155276 | 0.4415219889305657 |
| 0.3702856072190389 | 0.6573462563430792 | 0.4561183136806894 |
| 0.0366411378106760 | 0.9834752852531465 | 0.2885315575289226 |
| 0.7048274203373549 | 0.3392004161808119 | 0.6196238208598993 |
| 0.7697255490412966 | 0.7071151444899766 | 0.2964510437305194 |
| 0.4232750954841999 | 0.0287999042431637 | 0.6568650141548824 |
| 0.0926378046595933 | 0.3661916255152919 | 0.4683460195549944 |
| 0.0304359652051346 | 0.1984728800725403 | 0.2991660019404823 |
| 0.6809654397042026 | 0.5391819020397948 | 0.6821067402297808 |
| 0.3678680156506757 | 0.8580614238213807 | 0.4678836529402087 |
| 0.2812382855039857 | 0.9700512445358100 | 0.2673605950992664 |
| 0.9563112101889852 | 0.3157741588113794 | 0.6104769381592421 |

|                    |                    |                    |
|--------------------|--------------------|--------------------|
| 0.6280390494583296 | 0.6434904383311661 | 0.4377979676715490 |
| 0.2270846740155251 | 0.3165942687599755 | 0.3777160555803128 |
| 0.8935238560829786 | 0.6472085247049649 | 0.7099054464818045 |
| 0.5585378911535624 | 0.9865781123490859 | 0.5461976370545643 |
| 0.2686274990581948 | 0.9755317759110678 | 0.5310821939433930 |
| 0.9281481668430158 | 0.3055903067703116 | 0.3452582545452170 |
| 0.7584696341480215 | 0.1967215771737748 | 0.5366313152739690 |
| 0.4242082428429438 | 0.5287846180661445 | 0.3647554188203396 |
| 0.0980988227281831 | 0.8654899488660306 | 0.6976677653770417 |
| 0.5458074380337278 | 0.7146575028756770 | 0.5560913006464739 |
| 0.2167739138495231 | 0.0599485270311470 | 0.3858246657293368 |
| 0.8699482367259878 | 0.3878815937436785 | 0.7301197730887768 |
| 0.1848007285940337 | 0.8104361206129838 | 0.3784860704219758 |
| 0.8529290243219575 | 0.1380802823584561 | 0.7098789978166098 |
| 0.5208137308489137 | 0.4710444189710318 | 0.5458342027921534 |
| 0.5256310604533234 | 0.1924390007369769 | 0.5303057403475060 |
| 0.1948551775480914 | 0.5217131978426551 | 0.3464565019186821 |
| 0.8605530469561119 | 0.8684196346556449 | 0.7034055429060759 |
| 0.3067966775386672 | 0.4630346590221716 | 0.5343457529208477 |
| 0.9727802157135549 | 0.7941123749380478 | 0.3636534226585872 |
| 0.6350761469365545 | 0.1393811211301887 | 0.7005938206983392 |
| 0.7811832811273643 | 0.7159360716489245 | 0.5600351023540626 |
| 0.4398277545372616 | 0.0550537035256148 | 0.3874507025883432 |
| 0.1112278016544929 | 0.3816968478007609 | 0.7282077045591692 |
| 0.6897926118859228 | 0.2732034985932556 | 0.3779758342563116 |
| 0.3576266636577405 | 0.6153895242866309 | 0.7149980761788141 |
| 0.0293789103097314 | 0.9410925708262231 | 0.5433963813413627 |
| 0.3075729318356217 | 0.2312158584422578 | 0.5305520451118138 |
| 0.9786900343105233 | 0.5714032012031935 | 0.3430642238737516 |
| 0.6326188351249686 | 0.9031121951305854 | 0.7070949903800628 |
| 0.0372375364116635 | 0.7396649490865944 | 0.5340650168709178 |
| 0.7061120500910221 | 0.0781570516549007 | 0.3651885854376657 |
| 0.3652268540589174 | 0.3995273359287820 | 0.7004872303838428 |
| 0.7741625460048681 | 0.9561583098380418 | 0.5588377638667856 |
| 0.4442832403622296 | 0.2839440662047981 | 0.3852984609411528 |
| 0.1152556948625255 | 0.6261898467130839 | 0.7294203099315608 |
| 0.1400739892307934 | 0.1452662239490783 | 0.3298683395165990 |
| 0.8113009774943517 | 0.4815915888624800 | 0.6799792831838163 |
| 0.5993719441159131 | 0.6235580670763318 | 0.3182892741295718 |
| 0.2560536545722035 | 0.9546404064725028 | 0.6529518152590368 |
| 0.9256066867348448 | 0.2906740802672242 | 0.4944856855550829 |
| 0.4728072603270627 | 0.8075985792380180 | 0.5163516917339714 |
| 0.3552427424041750 | 0.8942146183114659 | 0.3305510442844243 |
| 0.0186524642126176 | 0.2305208037866830 | 0.6744772598430296 |

|                    |                    |                    |
|--------------------|--------------------|--------------------|
| 0.8763588366528910 | 0.8749827931283398 | 0.3214357466992041 |
| 0.5448925062570866 | 0.2014370101740139 | 0.6521426160871320 |
| 0.2103381809776251 | 0.5343435060055902 | 0.4929956512238747 |
| 0.6890189969810822 | 0.5608215901777281 | 0.5024230836226691 |
| 0.6054692614738213 | 0.3592135875066098 | 0.3281506702914260 |
| 0.2648489518066592 | 0.6852517019325387 | 0.6761927667835462 |
| 0.6245384544937339 | 0.9010879212489800 | 0.3219523932382632 |
| 0.2923909054342978 | 0.2406513344221516 | 0.6525930935826647 |
| 0.9658279743273693 | 0.5731189352346159 | 0.4945289669078556 |
| 0.9407743773428824 | 0.0294403996043052 | 0.5129083159582412 |
| 0.9329649003357753 | 0.7888720030210359 | 0.4855761862538646 |
| 0.4731396802209269 | 0.3066654143203937 | 0.5004465192204393 |
| 0.1458499169042953 | 0.6453680398475777 | 0.3461216611540788 |
| 0.7989717757692150 | 0.9772648364938025 | 0.6780305668506450 |
| 0.5882889902424417 | 0.1186081979609265 | 0.3245078565045917 |
| 0.2600527976699281 | 0.4559963114375315 | 0.6638278443858696 |
| 0.7101822048971181 | 0.0416639478485157 | 0.4876376306397538 |
| 0.1906552820617702 | 0.0632936871069172 | 0.5012310303691222 |
| 0.8544302428036217 | 0.3989960976274759 | 0.3454908707787790 |
| 0.5031860993884537 | 0.7474999891592048 | 0.7046482517072301 |
| 0.3808856443492021 | 0.3696907138958046 | 0.3231946775037979 |
| 0.0494753909549574 | 0.7049132275119022 | 0.6627701873025705 |
| 0.4607462918766337 | 0.5714178509802724 | 0.4883322165497487 |
| 0.4363258358594960 | 0.0242364680319690 | 0.5033176108737314 |
| 0.1004816118276921 | 0.3546296873204342 | 0.3462511717568877 |
| 0.7947740494026088 | 0.7065585603826876 | 0.6787870743411538 |
| 0.1315086769071755 | 0.9113883181716218 | 0.3233530457272150 |
| 0.7956674567743846 | 0.2414570098939158 | 0.6662313214414096 |
| 0.7008259860236659 | 0.3019868121853865 | 0.4990579790247090 |
| 0.6982113677407349 | 0.7988836271985674 | 0.5010046574574283 |
| 0.1997102136318237 | 0.2987288423013630 | 0.4981607087922454 |
| 0.2028778591034352 | 0.7996443721030276 | 0.4988991464665670 |
| 0.8699383294446500 | 0.1280575733411974 | 0.3352455751558247 |
| 0.5198325706913014 | 0.4520523133324751 | 0.6654456509705031 |
| 0.3731644136843773 | 0.6422868286470395 | 0.3352662803043301 |
| 0.0312017105874998 | 0.9600123983236123 | 0.6648513234909145 |
| 0.3665151838100139 | 0.1327294667191651 | 0.3105656265270780 |
| 0.0322072354669529 | 0.4651015804874267 | 0.6841889106920306 |
| 0.8604507985123845 | 0.6302440226943433 | 0.3317952309035799 |
| 0.5448238029435954 | 0.9773860271346120 | 0.6671778002735709 |

### The perfect Pd<sub>7</sub>-O<sub>V6</sub>-bt-CO<sub>2</sub> surface

O In Pd In C O

1.000000000000000

14.4443000000000001 0.000000000000000 0.000000000000000

-7.22214999999999965 12.5091307398835685 0.000000000000000

0.00000000000000011 0.00000000000000019 17.9854999999999983

O In Pd In C O

71 27 1 20 1 2

Direct

0.8405070674839791 0.6129598909181095 0.4563900594564816

0.5145429238776309 0.9516204232449341 0.2903107519484127

0.1725512312905751 0.2804985353675243 0.6206411356666142

0.7917960311039446 0.9603163488177953 0.2988054400984573

0.4684311832638623 0.2883624926258793 0.6609682300823817

0.1323441135873473 0.6255983837574515 0.4688712566345813

0.3002342678929428 0.7307840526497444 0.3005798534814174

0.9766634454308351 0.0703458257996802 0.6364499894638679

0.6398426629687299 0.4053740294611419 0.4650588415423022

0.5286287764774549 0.2090824584655072 0.2684914474298409

0.1812803203550791 0.5390677347618725 0.6089715204177929

0.8545544262410268 0.8808262307074463 0.4427146560746263

0.8861314261435931 0.1282350704663647 0.4563826503000295

0.5468962008380480 0.4633742330834699 0.2896153797167959

0.2159578404174486 0.7905834923185291 0.6199793706100553

0.5384629883687425 0.7315537115343143 0.2996924229538122

0.2053136765294236 0.0770228182357887 0.6556528233518454

0.8737604572664726 0.4071552608744390 0.4688376715731390

0.7677660475388632 0.4684734081540471 0.2990211886612134

0.4242859609433344 0.8101325219810992 0.6357143386562956

0.0941284210170934 0.1345874247580074 0.4655381210808999

0.2893985895933928 0.2193485833764088 0.2689365303746952

0.9582225554904138 0.5429476132415447 0.6101584351301642

0.6161782204099605 0.8732359159712041 0.4433559483388259

0.3713510072712612 0.6583926433588756 0.4584479336439451

0.0355253870069089 0.9838549574857425 0.2898563549384277

0.7080464991726013 0.3284544091150532 0.6203428999247410

0.7663747242352944 0.7062277744044710 0.2993367696875856

0.4213932194909716 0.0291897077072207 0.6546712161315341

0.0911027043295488 0.3649566737462268 0.4692126668911055

0.0302128504902102 0.1986311542051768 0.2995911619322739

0.6940925821054432 0.5260269957648431 0.6379199976001846

0.3645575830123506 0.8591770107138863 0.4655644366815674

0.2800561811074556 0.9700265221579092 0.2693100328628480

0.9555247780087526 0.3143550500550945 0.6109890170810541

|                    |                    |                    |
|--------------------|--------------------|--------------------|
| 0.6253922746660660 | 0.6435080661960206 | 0.4444047197976154 |
| 0.2266354682981447 | 0.3170333170305032 | 0.3788502376351828 |
| 0.8878231884724950 | 0.6438304141016385 | 0.7133450843676118 |
| 0.5575820384682063 | 0.9887175913424974 | 0.5434774287154296 |
| 0.2665610620012648 | 0.9749874659075137 | 0.5308093612138707 |
| 0.9274212478572817 | 0.3054820993456427 | 0.3460086768068295 |
| 0.7586176252117488 | 0.1948345838477103 | 0.5348562496198792 |
| 0.4230223157584384 | 0.5288290917839664 | 0.3669833153091008 |
| 0.0974734599484726 | 0.8665668757285611 | 0.6995829436612014 |
| 0.5432320272327111 | 0.7173305709958995 | 0.5643895254215890 |
| 0.2152276500124446 | 0.0596542766010924 | 0.3877583845006969 |
| 0.8711465640887848 | 0.3884883459088525 | 0.7296830679142970 |
| 0.1812433727123029 | 0.8092973862329237 | 0.3786706328903214 |
| 0.8538569709341017 | 0.1380937991842909 | 0.7115172808837632 |
| 0.5126919316420246 | 0.4686089309840436 | 0.5450887835362351 |
| 0.5239134589295151 | 0.1927076001475928 | 0.5309749324610510 |
| 0.1938108754382686 | 0.5216131949406674 | 0.3493703340451968 |
| 0.8613003333719539 | 0.8677580570225836 | 0.7028145432979359 |
| 0.3039183822861629 | 0.4632734380111317 | 0.5346659461887249 |
| 0.9700240546818905 | 0.7931987052717471 | 0.3639098010443189 |
| 0.6327887059615502 | 0.1336440830144826 | 0.7010389751060827 |
| 0.7832293798170763 | 0.7253456417650611 | 0.5607271875904406 |
| 0.4393083711013523 | 0.0563987424830093 | 0.3881604435725179 |
| 0.1116952628967141 | 0.3815021816475904 | 0.7287291635599803 |
| 0.6893257627618901 | 0.2723842882860547 | 0.3786978729586091 |
| 0.3585742822656457 | 0.6138588688259203 | 0.7075366169105115 |
| 0.0285527026072674 | 0.9417725741400490 | 0.5437079204140922 |
| 0.3082201086421351 | 0.2321186953867175 | 0.5313177171523095 |
| 0.9768813766266483 | 0.5713861133523177 | 0.3468441750678359 |
| 0.6340164139467495 | 0.9018846343287681 | 0.7005538430619396 |
| 0.0342282280915103 | 0.7402031821303273 | 0.5338788078093827 |
| 0.7053111066321003 | 0.0766843932738698 | 0.3647627799487523 |
| 0.3703537150603967 | 0.4020456310153733 | 0.6988985195016996 |
| 0.7749127840276012 | 0.9579630750365669 | 0.5590505032632448 |
| 0.4434378630991503 | 0.2835345516966524 | 0.3864110602672543 |
| 0.1175920184954233 | 0.6274013672641514 | 0.7292215388066194 |
| 0.1396908999828836 | 0.1454268410620821 | 0.3316342352645750 |
| 0.8121943059092969 | 0.4792156146832778 | 0.6748144012692652 |
| 0.5977310656433760 | 0.6231089769454814 | 0.3238116636556551 |
| 0.2543549327966662 | 0.9542125241254057 | 0.6526733045989775 |
| 0.9244487402090299 | 0.2899006258607535 | 0.4951312846700501 |
| 0.4693002270201659 | 0.8102841659555009 | 0.5162906076605074 |
| 0.3535094934833641 | 0.8938496724203853 | 0.3329886334032207 |
| 0.0190965125838169 | 0.2306029662241808 | 0.6751481605046566 |

|                    |                    |                    |
|--------------------|--------------------|--------------------|
| 0.8749032169788785 | 0.8746275393129642 | 0.3222657052806335 |
| 0.5454202824836778 | 0.2001345332470230 | 0.6527942181685170 |
| 0.2081358091621481 | 0.5337747070897417 | 0.4933346560475474 |
| 0.6886144372042909 | 0.5585433738110480 | 0.5132650455880939 |
| 0.6049487089664025 | 0.3592624787796674 | 0.3304512538396795 |
| 0.2658495432659558 | 0.6868292612230986 | 0.6724728351793504 |
| 0.6235820594432915 | 0.9003749904596434 | 0.3230455533311994 |
| 0.2977302543452215 | 0.2434212232383771 | 0.6533033750291877 |
| 0.9645084055038406 | 0.5743971804120946 | 0.4942417699640052 |
| 0.9404826673842017 | 0.0298145032341544 | 0.5130774401233087 |
| 0.9299717607004543 | 0.7893424853167003 | 0.4864094885769993 |
| 0.4733187906729859 | 0.3080604837476231 | 0.5012230126781509 |
| 0.1442098515494239 | 0.6452672853403542 | 0.3474448421490863 |
| 0.8011936158000847 | 0.9775054113725261 | 0.6788609562984553 |
| 0.5871346322971525 | 0.1180368159429852 | 0.3250628211490605 |
| 0.2600105227569832 | 0.4541491937234560 | 0.6637365425099645 |
| 0.7099128721634074 | 0.0408577877406744 | 0.4873739390060989 |
| 0.1898927967847562 | 0.0644362701010735 | 0.5036044795555644 |
| 0.8536073508736558 | 0.3987268560811980 | 0.3471859964715210 |
| 0.5102434597573866 | 0.7408768392274810 | 0.6919355120707200 |
| 0.3805610414930936 | 0.3698479743256989 | 0.3248012175959764 |
| 0.0465842926763164 | 0.7046294125430969 | 0.6659630093785303 |
| 0.4592212720451982 | 0.5715934280609921 | 0.4915239238034690 |
| 0.4341688795060415 | 0.0252906716504227 | 0.5038822508242637 |
| 0.0995607696553832 | 0.3540705302020769 | 0.3476116857851483 |
| 0.7889861037608179 | 0.7020078780480468 | 0.6785284796534535 |
| 0.1297642535147128 | 0.9115680814480435 | 0.3246354022161272 |
| 0.7945883927587857 | 0.2393853130525822 | 0.6671519234528591 |
| 0.6992371702516401 | 0.2999336569337003 | 0.4995873610702999 |
| 0.6980577557912849 | 0.7998195258703582 | 0.5041845955730305 |
| 0.1994667929716578 | 0.2988904814933247 | 0.4996316151955276 |
| 0.1995964510746509 | 0.8001210534217694 | 0.4992608409968879 |
| 0.8694829197508601 | 0.1273323720262472 | 0.3351915317251791 |
| 0.5282311412758680 | 0.4595819572046466 | 0.6645482360919471 |
| 0.3723684134228337 | 0.6424897474617325 | 0.3372517437981043 |
| 0.0292545764658423 | 0.9590037564266914 | 0.6650879373062397 |
| 0.3658311388444614 | 0.1327515127770610 | 0.3124664613542506 |
| 0.0331547749523566 | 0.4654448172123569 | 0.6846399283182648 |
| 0.8563059724800357 | 0.6289598678402869 | 0.3350069696738503 |
| 0.5414442790416253 | 0.9738997848775977 | 0.6646539087595745 |
| 0.5788186337061901 | 0.6816132992418311 | 0.7558123405755254 |
| 0.5788922317180895 | 0.7012194818385293 | 0.8212845309366630 |
| 0.6190267923129509 | 0.6271435958453371 | 0.7228734471488323 |



### The perfect Pd<sub>7</sub>-O<sub>V6</sub>-[CO<sub>2</sub>+H]\* surface

O In Pd In C O H

1.000000000000000

14.4443000000000001 0.000000000000000 0.000000000000000

-7.22214999999999965 12.5091307398835685 0.000000000000000

0.00000000000000011 0.00000000000000019 17.985499999999983

O In Pd In C O H

71 27 1 20 1 2 1

Direct

0.8417824627857632 0.6146437140838655 0.4555388908288135

0.5150358791033571 0.9521968561879379 0.2878461960056523

0.1718278772547234 0.2802303277495399 0.6210498019561840

0.7922977644134896 0.9607806168632054 0.2978421147210859

0.4700653199033450 0.2903251645255287 0.6607073217687853

0.1317126479464415 0.6251263651291205 0.4691317339093878

0.3002494012104379 0.7306062526995240 0.2995447873513011

0.9755462500843058 0.0694369561374444 0.6362884106371252

0.6403318909090868 0.4048647802284306 0.4661738938060070

0.5285379448094946 0.2095553850453897 0.2677872321826880

0.1800753110312650 0.5391169389299965 0.6095356928006544

0.8551555098698740 0.8808695110707985 0.4418174648214706

0.8860024094118850 0.1280151243603745 0.4558196898658713

0.5464986460147632 0.4627437936343927 0.2882812465964922

0.2201266818237806 0.7918966342995645 0.6185785781142540

0.5387433047998241 0.7313174890478840 0.2987640640056538

0.2052104380570620 0.0762283459418735 0.6595586739458305

0.8731447671470695 0.4071691952671597 0.4694264326911750

0.7678268978157448 0.4688217177639155 0.2990547675072432

0.4259841207794651 0.8072536479491805 0.6374888150649943

0.0942691652717888 0.1345515140650906 0.4656940157334798

0.2897441774107574 0.2197222787423380 0.2688230532577458

0.9500484798072806 0.5481719231259046 0.6106039803225074

0.6170650390766595 0.8754147099582935 0.4410006283526229

0.3688263756305984 0.6573855856356532 0.4573041396618501

0.0361735478692315 0.9843609009990404 0.2889202302469346

0.7053547765548041 0.3243636983126530 0.6193577004675336

0.7677411668539348 0.7071642011755259 0.2969045228246710

0.4208006847804445 0.0276482165260462 0.6575031799041158

0.0914828655248436 0.3653890878730811 0.4695145871750231

0.0303707241070619 0.1990650048709465 0.2994009199176021

0.7002036301210511 0.5297035343574112 0.6407505301594315

0.3666039777847309 0.8588279949289557 0.4651947753615808

0.2803070133677137 0.9703820102359572 0.2681108788029205

0.9544338555762133 0.3160952326126958 0.6108841725598465

|                    |                    |                    |
|--------------------|--------------------|--------------------|
| 0.6283058205408557 | 0.6412078340912353 | 0.4413334181062285 |
| 0.2266593057375431 | 0.3167646860760231 | 0.3792400320168558 |
| 0.8861145119829031 | 0.6488599106275240 | 0.7234675891225717 |
| 0.5575872223171958 | 0.9874053821151988 | 0.5443916759198048 |
| 0.2677663768843732 | 0.9757450410828500 | 0.5307239253850533 |
| 0.9275348527840725 | 0.3059294881591982 | 0.3468588509275532 |
| 0.7586398119893613 | 0.1941276301770115 | 0.5338758343486451 |
| 0.4234295028472446 | 0.5288385713387065 | 0.3665778937747550 |
| 0.0948476954284312 | 0.8628132599190866 | 0.6973182907998933 |
| 0.5450766730543951 | 0.7163233571007417 | 0.5572867092692698 |
| 0.2155023402158370 | 0.0596160104053251 | 0.3868167603003190 |
| 0.8697231948297625 | 0.3891804798956524 | 0.7295261249925787 |
| 0.1822636113132341 | 0.8095227854475295 | 0.3777371265859457 |
| 0.8536653095489644 | 0.1382181307705841 | 0.7104367925860254 |
| 0.5159217372562717 | 0.4704001135244999 | 0.5469806983150750 |
| 0.5225993303231012 | 0.1910441188600472 | 0.5308879397736715 |
| 0.1934232811041190 | 0.5213222962737758 | 0.3477380703609501 |
| 0.8614446181130263 | 0.8674228807566241 | 0.7036840959271096 |
| 0.3048634097969648 | 0.4635420578283893 | 0.5352196340095694 |
| 0.9709826733685983 | 0.7938496239184364 | 0.3633498001187224 |
| 0.6320972763863162 | 0.1327073509063784 | 0.7007977462024425 |
| 0.7839181591384202 | 0.7249517455688073 | 0.5603895782438597 |
| 0.4396382108130727 | 0.0557812412522727 | 0.3869108932700526 |
| 0.1095827731558216 | 0.3808629137417105 | 0.7290673931126123 |
| 0.6888748588482213 | 0.2725505993671879 | 0.3780205601488658 |
| 0.3526789295568878 | 0.6112885276585911 | 0.7143281202712876 |
| 0.0293278724591418 | 0.9418930863947121 | 0.5433151515553467 |
| 0.3080744844984830 | 0.2313089351123344 | 0.5323663631287073 |
| 0.9768250082854407 | 0.5717593944981432 | 0.3479235136921383 |
| 0.6342488374794725 | 0.9022510115752849 | 0.7047383709048892 |
| 0.0366506364106388 | 0.7416518676544391 | 0.5328897961524244 |
| 0.7056594728842346 | 0.0778246019674992 | 0.3631278757540132 |
| 0.3683185462388117 | 0.4004050873739655 | 0.6998985751013462 |
| 0.7744652462386683 | 0.9568440564189845 | 0.5584338372389008 |
| 0.4438954455148696 | 0.2842128778554665 | 0.3870920134069085 |
| 0.1138150078856835 | 0.6278967705859895 | 0.7271242224061559 |
| 0.1398055044634106 | 0.1457717677707814 | 0.3311585566663450 |
| 0.8056489043476228 | 0.4722395140684106 | 0.6736865271232193 |
| 0.5984752616448666 | 0.6229375635286981 | 0.3219491790321040 |
| 0.2548231580610065 | 0.9547946386154271 | 0.6525111236439401 |
| 0.9244659590458713 | 0.2898424138596386 | 0.4942702813903256 |
| 0.4704376773699160 | 0.8081944750369047 | 0.5171322510838996 |
| 0.3542485425083298 | 0.8938591076502470 | 0.3308376405955151 |
| 0.0184037046815232 | 0.2305099131313798 | 0.6745151392365000 |

|                    |                    |                    |
|--------------------|--------------------|--------------------|
| 0.8754111765909923 | 0.8751931732519623 | 0.3209155649496828 |
| 0.5426653386625333 | 0.1973757753519902 | 0.6530144410136421 |
| 0.2088047933031335 | 0.5339756721930564 | 0.4940378884938765 |
| 0.6895334718139263 | 0.5587398942369244 | 0.5121727025526115 |
| 0.6045785594910718 | 0.3594122258919373 | 0.3299700744845786 |
| 0.2668391725158166 | 0.6864371539961120 | 0.6740081182264726 |
| 0.6237256366103335 | 0.9007358009528756 | 0.3212329985179407 |
| 0.2973622342201837 | 0.2430606476565683 | 0.6542265031752956 |
| 0.9638322543004645 | 0.5747705382222567 | 0.4919975228547339 |
| 0.9400867270210349 | 0.0297563771884568 | 0.5128581424197879 |
| 0.9308591575667007 | 0.7902486084373320 | 0.4855140421918529 |
| 0.4736669100114030 | 0.3085537201231543 | 0.5024253416262059 |
| 0.1446229897108441 | 0.6447175194154604 | 0.3471624066767691 |
| 0.7988892081399851 | 0.9764670829620935 | 0.6785310955474361 |
| 0.5874481814310045 | 0.1183037232544886 | 0.3234820740221865 |
| 0.2599505362021707 | 0.4546925669007816 | 0.6655725157850727 |
| 0.7093817657236493 | 0.0399528266368929 | 0.4864685861304156 |
| 0.1904777700051614 | 0.0644536672679154 | 0.5023086516084004 |
| 0.8533358805140883 | 0.3988337021159333 | 0.3472852481751998 |
| 0.5066331093356160 | 0.7403054234151466 | 0.7018663359310187 |
| 0.3806454928967051 | 0.3699738441385586 | 0.3248932304655024 |
| 0.0519040184825279 | 0.7070561138179723 | 0.6581281140694853 |
| 0.4603067331006246 | 0.5717525116585063 | 0.4904816653877953 |
| 0.4355846590416626 | 0.0243760439805342 | 0.5025833376756883 |
| 0.0999141212991826 | 0.3542299670294980 | 0.3476952028775896 |
| 0.7763509103477391 | 0.7032161397807337 | 0.6778892000490981 |
| 0.1302469848283542 | 0.9117376914321699 | 0.3235819705359991 |
| 0.7929166002263635 | 0.2371199283273266 | 0.6658942809052102 |
| 0.6978237919257608 | 0.2976979259292231 | 0.4987006446113662 |
| 0.6974194284192610 | 0.7990841282412179 | 0.5007015943852791 |
| 0.1997846606155228 | 0.2991231239509818 | 0.5002394965350535 |
| 0.2025307336495663 | 0.8009686793661978 | 0.4976136110758504 |
| 0.8694182582518131 | 0.1274983081471735 | 0.3345266571429784 |
| 0.5279500483223497 | 0.4620041375431839 | 0.6667293875270576 |
| 0.3725275304686705 | 0.6424213500741808 | 0.3367345090064043 |
| 0.0290464369316183 | 0.9590528696490673 | 0.6643640632773181 |
| 0.3660993633334190 | 0.1330204881099795 | 0.3119913127444753 |
| 0.0323819426682140 | 0.4652002094629446 | 0.6849734444310603 |
| 0.8564467274913439 | 0.6298266750296304 | 0.3338586041969787 |
| 0.5412921488085728 | 0.9715621850297720 | 0.6660325014640918 |
| 0.5759817672201651 | 0.6812083557361104 | 0.7635795449992838 |
| 0.5907070213397561 | 0.6938809023795385 | 0.8296987542933344 |
| 0.6134074974168052 | 0.6247358955920020 | 0.7217915409638118 |
| 0.9043979761276583 | 0.6652356037715520 | 0.7756527388306546 |

### The perfect Pd<sub>7</sub>-O<sub>V6</sub>-[CO+OH]\* surface

O In Pd In C O H

1.000000000000000

14.4443000000000001 0.000000000000000 0.000000000000000

-7.2221499999999965 12.5091307398835685 0.000000000000000

0.00000000000000011 0.0000000000000019 17.985499999999983

O In Pd In C O H

71 27 1 20 1 2 1

Direct

0.8425330836311256 0.6132291903322060 0.4545459684571424

0.5151576985410673 0.9516983147266878 0.2880792779494032

0.1732503940140559 0.2817748553901777 0.6203416642855865

0.7927338436631285 0.9603704603689893 0.2971551479217118

0.4690704859314443 0.2893671103638158 0.6662611013149278

0.1332500769870697 0.6249084387904652 0.4680270982576767

0.3016276440770716 0.7317378201646894 0.2993136513492217

0.9759581112567367 0.0695042381850830 0.6355408784279332

0.6392565795426498 0.4036648158490102 0.4604223778279893

0.5283584712741090 0.2083203042215417 0.2672591551869192

0.1852450553162300 0.5411819713306748 0.6103655994211186

0.8550043414350246 0.8810271663454708 0.4413961947734164

0.8863892626862667 0.1277422306645916 0.4554392000772871

0.5468797903140561 0.4623639322589955 0.2867550408928726

0.2182684612215228 0.7919709583898270 0.6205470878363573

0.5392662021099601 0.7312199296290658 0.2977252048847355

0.2056121060767936 0.0783101797078729 0.6547703701402183

0.8734123442164223 0.4067711460724954 0.4672075911364514

0.7688671814408045 0.4688597115950615 0.2974711968130574

0.4293729772593250 0.8059547636374221 0.6400743889737054

0.0945822844793692 0.1350682818979829 0.4655912336304969

0.2887042934529482 0.2187344904294160 0.2672783293513475

0.9598910125736408 0.5425020552169688 0.6078078412186675

0.6177321895078256 0.8753574687128636 0.4407083161605621

0.3692392923765568 0.6570337594409942 0.4558579365109083

0.0365546844188843 0.9839712651973128 0.2891902517471932

0.7080590081688803 0.3271142069340231 0.6174886217487732

0.7685489512544309 0.7067659452916696 0.2963548835353028

0.4214026497387226 0.0289140678934461 0.6535879300607875

0.0923570641773062 0.3668576862766380 0.4681230926908406

0.0307845167701994 0.1986979697389408 0.2989064760577060

0.6974437790494626 0.5230816074629477 0.6281333535507234

0.3661420717121299 0.8574822411110397 0.4682850908375373

0.2802642804678446 0.9698899373826589 0.2684199474849915

0.9559431616678506 0.3145839448281450 0.6091385567787089

|                    |                    |                    |
|--------------------|--------------------|--------------------|
| 0.6283584268408026 | 0.6405580938195251 | 0.4397436882278907 |
| 0.2271722592662376 | 0.3168553218951487 | 0.3782956734988014 |
| 0.8864886463020666 | 0.6428045980079740 | 0.7110701829713111 |
| 0.5577512938572390 | 0.9867364339383904 | 0.5442556566474248 |
| 0.2665847325223399 | 0.9746242266245015 | 0.5300276369007584 |
| 0.9281975940590463 | 0.3055570352493835 | 0.3455546038339494 |
| 0.7583264375401016 | 0.1941010120926248 | 0.5326918582921847 |
| 0.4235916704996055 | 0.5283790017317732 | 0.3645808425315428 |
| 0.0969271392165341 | 0.8668375578595162 | 0.6982424746658683 |
| 0.5445424813445464 | 0.7146781349083372 | 0.5557650611208435 |
| 0.2160062219146662 | 0.0600650312228644 | 0.3873542304140862 |
| 0.8701768561017733 | 0.3881446481191860 | 0.7274459619799919 |
| 0.1834817233148932 | 0.8097200180469148 | 0.3785107996539154 |
| 0.8526794861314644 | 0.1370462186600057 | 0.7086649366057439 |
| 0.5128459990921843 | 0.4669865151901743 | 0.5435396066592284 |
| 0.5224218978469886 | 0.1925856596774968 | 0.5300458731464570 |
| 0.1939949349321344 | 0.5214229080924200 | 0.3439222425291210 |
| 0.8586892816820347 | 0.8657986520628780 | 0.7018647488795137 |
| 0.3053106415629987 | 0.4640677155336942 | 0.5341655509025667 |
| 0.9712530746886584 | 0.7935659988267063 | 0.3635235596287659 |
| 0.6328022581651253 | 0.1361243086649282 | 0.7008327288824276 |
| 0.7833681517646465 | 0.7257238848696409 | 0.5590184014680168 |
| 0.4399422699407858 | 0.0548541686748866 | 0.3876770235257012 |
| 0.1110974705272699 | 0.3814224947581474 | 0.7280208026978680 |
| 0.6900298408122199 | 0.2718045132523511 | 0.3764125061655481 |
| 0.3509245707527854 | 0.6176894950199513 | 0.7198313372431699 |
| 0.0286321763559016 | 0.9415108510492739 | 0.5427907457140246 |
| 0.3092700703927214 | 0.2326436896528426 | 0.5309644247759131 |
| 0.9782789430694876 | 0.5718523177414937 | 0.3458635392084083 |
| 0.6321526222846391 | 0.9072878174427953 | 0.7075538459389535 |
| 0.0355712056682458 | 0.7401773664865405 | 0.5333572774770844 |
| 0.7061850548967644 | 0.0770716511638381 | 0.3627627252319664 |
| 0.3724323465424269 | 0.4058264493720071 | 0.6964616267227740 |
| 0.7732969029717928 | 0.9565068085443880 | 0.5585273805844903 |
| 0.4425730623516902 | 0.2827180530460069 | 0.3839536151459512 |
| 0.1127923751237532 | 0.6266954513422761 | 0.7289106156352939 |
| 0.1400279542832675 | 0.1454447048795650 | 0.3313169878224711 |
| 0.8127999320129212 | 0.4790273937216253 | 0.6704953156213050 |
| 0.5989883044236380 | 0.6225340650230036 | 0.3206682475335629 |
| 0.2540700513454420 | 0.9555185126869888 | 0.6518124714253908 |
| 0.9247381730791520 | 0.2899513907581736 | 0.4931211912758897 |
| 0.4718927329909777 | 0.8070602151981747 | 0.5165970501042187 |
| 0.3545082942823547 | 0.8939607493839128 | 0.3316498563562064 |
| 0.0190614609417418 | 0.2305131160725902 | 0.6733348952383664 |

|                    |                    |                    |
|--------------------|--------------------|--------------------|
| 0.8758178855616420 | 0.8747834043997479 | 0.3210441584766569 |
| 0.5453920719350757 | 0.2016938034794155 | 0.6518411241333888 |
| 0.2099357235814699 | 0.5346009599771044 | 0.4942903373780907 |
| 0.6894312978497589 | 0.5572513201025254 | 0.5093212964737482 |
| 0.6055234201862730 | 0.3592245142228548 | 0.3288776524284445 |
| 0.2630757417078578 | 0.6877194914538521 | 0.6753026538502254 |
| 0.6242796754302551 | 0.9004471749160056 | 0.3211088072020306 |
| 0.2990841909152260 | 0.2457363126530695 | 0.6527132814025361 |
| 0.9654581422549363 | 0.5742184476463088 | 0.4921754298487008 |
| 0.9400102117442193 | 0.0292192346582939 | 0.5124536729599387 |
| 0.9301972373815861 | 0.7890105062646855 | 0.4860095767021551 |
| 0.4731717555111524 | 0.308478333359897  | 0.4982168620228811 |
| 0.1457786616221542 | 0.6450773125164574 | 0.3464707950726457 |
| 0.7985578178765922 | 0.9751936240925601 | 0.6778404705468245 |
| 0.5875321139363695 | 0.1176134469271368 | 0.3235557743103029 |
| 0.2624409530832588 | 0.4576964420355266 | 0.6656137576094316 |
| 0.7098161077728413 | 0.0400045451957250 | 0.4860588067661328 |
| 0.1903886585377226 | 0.0649564078662194 | 0.5033793721192484 |
| 0.8543285722624996 | 0.3988544330226790 | 0.3457308279291694 |
| 0.4992463692417630 | 0.7529450208903856 | 0.7162702999640165 |
| 0.3803672618680176 | 0.3695716197826588 | 0.3226189559676306 |
| 0.0448693527544346 | 0.7046741529433350 | 0.6641360015738849 |
| 0.4606747590972421 | 0.5709834975861836 | 0.4887390798328772 |
| 0.4346902661165004 | 0.0240681631473583 | 0.5037178890516600 |
| 0.1006512322427082 | 0.3546073060747821 | 0.3464851573559702 |
| 0.7848120857994116 | 0.6983716567195516 | 0.6767702686640336 |
| 0.1306541193765778 | 0.9116298058657764 | 0.3247333718128331 |
| 0.7941906516056078 | 0.2391894028383679 | 0.6648372675767087 |
| 0.6985378247496766 | 0.2989312596081172 | 0.4972979150249917 |
| 0.6974691335900696 | 0.7978377020022884 | 0.5009582632469749 |
| 0.2002036121215080 | 0.2998742705500528 | 0.4994012818007488 |
| 0.2010201211550563 | 0.7996262459041754 | 0.4991095322440453 |
| 0.8700105105464288 | 0.1271777629257078 | 0.3341286260562757 |
| 0.5326388829457596 | 0.4610674388941389 | 0.6638265230932647 |
| 0.3726389326008062 | 0.6419583779347712 | 0.3355664614757450 |
| 0.0276681191324760 | 0.9581816914596210 | 0.6641120608790250 |
| 0.3658185871423024 | 0.1325438093121313 | 0.3111750432401788 |
| 0.0325683583982907 | 0.4650937020112319 | 0.6838566062473972 |
| 0.8578376597856265 | 0.6295875599071002 | 0.3333791960833503 |
| 0.5419404217841421 | 0.9765544597747524 | 0.6646682730110880 |
| 0.5469496372395038 | 0.7204175751650046 | 0.8030058124465836 |
| 0.5720927113137768 | 0.7073636962586920 | 0.8612351890224211 |
| 0.6274939326162178 | 0.6070352536749570 | 0.7326529147682366 |
| 0.6296118293120005 | 0.5963466639686242 | 0.7856282857879440 |

### The perfect Pd<sub>7</sub>-O<sub>V6</sub>-[TS-CO-O]\* surface

| O                   | In | Pd | In | C                   | O                   |
|---------------------|----|----|----|---------------------|---------------------|
| 1.000000000000000   |    |    |    |                     |                     |
| 14.4443000000000001 |    |    |    | 0.000000000000000   | 0.000000000000000   |
| -7.2221500000000001 |    |    |    | 12.5091307398836005 | 0.000000000000000   |
| 0.00000000000000011 |    |    |    | 0.00000000000000019 | 17.9855000000000018 |

| O  | In | Pd | In | C | O |
|----|----|----|----|---|---|
| 71 | 27 | 1  | 20 | 1 | 2 |

#### Direct

|                    |                    |                    |
|--------------------|--------------------|--------------------|
| 0.8413467421324962 | 0.6129166921172574 | 0.4570583660196961 |
| 0.5148058498706750 | 0.9523297704216184 | 0.2888984159852278 |
| 0.1708952376263783 | 0.2794733420925110 | 0.6189299805243600 |
| 0.7924870941932598 | 0.9608561621508344 | 0.2976150665582435 |
| 0.4708099498426344 | 0.2936231537084631 | 0.6548092340219310 |
| 0.1314502178695513 | 0.6250159087898634 | 0.4686074005533536 |
| 0.3000861587617426 | 0.7312021967540324 | 0.2996282075646919 |
| 0.9775079775700872 | 0.0705339785245278 | 0.6349638295762509 |
| 0.6396616189472767 | 0.4054839961092905 | 0.4659842769204650 |
| 0.5282551747258524 | 0.2099005286525761 | 0.2698650423440130 |
| 0.1812614788989068 | 0.5386817806221345 | 0.6092000055501534 |
| 0.8550917295571597 | 0.8813345825426493 | 0.4421187162987716 |
| 0.8865112649992651 | 0.1289508242070204 | 0.4552968921423751 |
| 0.5467286868594632 | 0.4631218058211335 | 0.2900873159736485 |
| 0.2199663049467154 | 0.7908385771698192 | 0.6201797374592303 |
| 0.5383712609027483 | 0.7315999804532963 | 0.2985080698264359 |
| 0.2060466402811250 | 0.0770612488644088 | 0.6557781549745458 |
| 0.8741979258677662 | 0.4073317123706285 | 0.4685859536901550 |
| 0.7668648724450468 | 0.4688822655840093 | 0.3001846848867787 |
| 0.4307378803906149 | 0.8073217624784959 | 0.6432762826255621 |
| 0.0939520307195204 | 0.1339770746297132 | 0.4638940185262274 |
| 0.2898396732158844 | 0.2194086548854095 | 0.2696882647052509 |
| 0.9588147599396906 | 0.5429493540705373 | 0.6109438667668291 |
| 0.6178378014894237 | 0.8756944550991432 | 0.4407270182014326 |
| 0.3686355207698842 | 0.6578200128277991 | 0.4565892403208264 |
| 0.0359800266786457 | 0.9837101027689166 | 0.2895272859190935 |
| 0.7094491062437089 | 0.3276616262890192 | 0.6204985414523652 |
| 0.7672678603766786 | 0.7067997948483402 | 0.2987828746192841 |
| 0.4228748101774099 | 0.0288563547993642 | 0.6544040295536915 |
| 0.0903099380480984 | 0.3651775409362568 | 0.4682689864336781 |
| 0.0303129532302778 | 0.1986841704517683 | 0.2987495337743118 |
| 0.6934304140541342 | 0.5221361777518334 | 0.6359652734868916 |
| 0.3651899530580364 | 0.8587617908562895 | 0.4673194808509230 |
| 0.2801121077764109 | 0.9704825945807497 | 0.2691869161572972 |
| 0.9547559480099617 | 0.3147927391792857 | 0.6108616831704630 |

|                    |                    |                    |
|--------------------|--------------------|--------------------|
| 0.6263679411386516 | 0.6432467312310193 | 0.4429175700249656 |
| 0.2260370994283083 | 0.3175282483705923 | 0.3781010734577562 |
| 0.8856298377818927 | 0.6467599007259121 | 0.7110326980049869 |
| 0.5573399257338640 | 0.9861123880663831 | 0.5445702512995639 |
| 0.2668026901060493 | 0.9746177192491270 | 0.5309415988649167 |
| 0.9272104230000420 | 0.3060511602495169 | 0.3437490180345917 |
| 0.7579493895912214 | 0.1938977040980218 | 0.5341320626963503 |
| 0.4228259544265939 | 0.5293456746755550 | 0.3662111097843059 |
| 0.0996626771367265 | 0.8669905494029317 | 0.6994939773148107 |
| 0.5413933407349039 | 0.7201045770860383 | 0.5584205577351682 |
| 0.2155059985117438 | 0.0592226969454494 | 0.3878115088707296 |
| 0.8708654600119395 | 0.3896932512035923 | 0.7303207015262086 |
| 0.1825973544700865 | 0.8097171493564974 | 0.3790077352536321 |
| 0.8528119373799402 | 0.1370677142611371 | 0.7101528015455881 |
| 0.5120831280420589 | 0.4713426026283182 | 0.5451580262128509 |
| 0.5244539970923323 | 0.1920720612988762 | 0.5309440748072426 |
| 0.1930299816442085 | 0.5216344964586467 | 0.3474336415836621 |
| 0.8628502990887024 | 0.8686197471052159 | 0.7027067986599563 |
| 0.3031690225836229 | 0.4630430046635353 | 0.5335549743458357 |
| 0.9706646794114384 | 0.7935066824464323 | 0.3649111213005284 |
| 0.6327075380175693 | 0.1344607110246889 | 0.7019175462366727 |
| 0.7826751356614745 | 0.7261597349614717 | 0.5602388828108766 |
| 0.4394248355229136 | 0.0549814471443954 | 0.3884054243779604 |
| 0.1109489125031780 | 0.3808989608895921 | 0.7281165228309864 |
| 0.6895403472880026 | 0.2726715239693671 | 0.3791185908518653 |
| 0.3599468698475057 | 0.6118887239629486 | 0.7038591744792508 |
| 0.0291873393927850 | 0.9418902793080935 | 0.5433204178924707 |
| 0.3068340085227895 | 0.2316528517900725 | 0.5306778944811593 |
| 0.9770425897264148 | 0.5718200617576508 | 0.3451524209743789 |
| 0.6362919583440427 | 0.8998953221270114 | 0.6996002479313163 |
| 0.0352514758255609 | 0.7405120735304600 | 0.5351193891277516 |
| 0.7058311028564962 | 0.0776797143169072 | 0.3631734812238877 |
| 0.3662867180391525 | 0.3990046301484260 | 0.6998284809524686 |
| 0.7750530369778222 | 0.9581052300184529 | 0.5577188714299541 |
| 0.4431439882104963 | 0.2840209115763833 | 0.3889139859662464 |
| 0.1176539220354633 | 0.6278720695476073 | 0.7295224599673107 |
| 0.1395141765731915 | 0.1453308726377686 | 0.3315568105701536 |
| 0.8118503505520193 | 0.4809043157338643 | 0.6749421140988365 |
| 0.5981186119823060 | 0.6233348701509764 | 0.3232056845832317 |
| 0.2556638984839074 | 0.9544650875993896 | 0.6526133109886392 |
| 0.9240181810636989 | 0.2897304154587368 | 0.4949920081943240 |
| 0.4710479319507725 | 0.8103843297838287 | 0.5137044693252101 |
| 0.3537815217995231 | 0.8941635226281708 | 0.3316332160018995 |
| 0.0182887267435523 | 0.2300958973633824 | 0.6739991792349466 |



|                    |                    |                    |
|--------------------|--------------------|--------------------|
| 0.8754208230428898 | 0.8749378725194182 | 0.3221156232653287 |
| 0.5455846998121118 | 0.2019310872266677 | 0.6525799545076840 |
| 0.2076258882944572 | 0.5335872909545956 | 0.4929263920017997 |
| 0.6885083827493808 | 0.5590329062962811 | 0.5140023918810713 |
| 0.6044884750874525 | 0.3596973912246738 | 0.3329850667162961 |
| 0.2656694770355096 | 0.6853657896180740 | 0.6733085528100338 |
| 0.6241312824605880 | 0.9009973893964114 | 0.3209578582490182 |
| 0.2982187668332814 | 0.2434752765182605 | 0.6524885155347193 |
| 0.9643448789352469 | 0.5742457242698480 | 0.4952065047972409 |
| 0.9406766038524521 | 0.0298326866389673 | 0.5118065786083471 |
| 0.9293640291406753 | 0.7887492989491772 | 0.4875561609961685 |
| 0.4739485279839716 | 0.3099538771069378 | 0.5048232612776994 |
| 0.1440487994333117 | 0.6453157180139621 | 0.3470201116635752 |
| 0.8038959980252217 | 0.9771626922530745 | 0.6770808619346864 |
| 0.5873794590228517 | 0.1186549857920538 | 0.3249229121240994 |
| 0.2582200578609067 | 0.4510667458749817 | 0.6617980905853837 |
| 0.7103129491357139 | 0.0409135940660471 | 0.4861755741081163 |
| 0.1901594824208142 | 0.0643336012244984 | 0.5034514281233663 |
| 0.8536062153204795 | 0.3992932758819638 | 0.3468672481296444 |
| 0.5136482703132447 | 0.7380123007155210 | 0.6943591639973966 |
| 0.3808520885052094 | 0.3697605582242213 | 0.3258293883726595 |
| 0.0453505230536001 | 0.7049356858511515 | 0.6662041034443174 |
| 0.4591318170961488 | 0.5724876827968179 | 0.4901276850230461 |
| 0.4346832660355512 | 0.0251449783278565 | 0.5044090513849219 |
| 0.0989269325540784 | 0.3543245538411759 | 0.3465221306783921 |
| 0.7775822391236995 | 0.6992395171994953 | 0.6801044736675288 |
| 0.1299193078068156 | 0.9113578663882165 | 0.3249625413399052 |
| 0.7946271859238063 | 0.2404454304133724 | 0.6674490966072109 |
| 0.6992962918146204 | 0.3000562898855526 | 0.4997165544586916 |
| 0.6978038293416425 | 0.7994819072258285 | 0.5025822619571965 |
| 0.1988951511804457 | 0.2985240842299102 | 0.4984084467234232 |
| 0.1998789357857473 | 0.7996530672293991 | 0.4995683568031412 |
| 0.8696142396905300 | 0.1280300816299807 | 0.3339795862055936 |
| 0.5280661717052695 | 0.4704058267910006 | 0.6662846942872169 |
| 0.3716945067457329 | 0.6421431900956455 | 0.3359795494876963 |
| 0.0291199814203111 | 0.9576407255230952 | 0.6646213219655208 |
| 0.3659309302053670 | 0.1331106573380583 | 0.3138633466998075 |
| 0.0324772873519798 | 0.4654386396890587 | 0.6850051702327880 |
| 0.8567569129690634 | 0.6294868665077974 | 0.3355766318031555 |
| 0.5447479843328888 | 0.9753241879221392 | 0.6654526883390076 |
| 0.5496826825467099 | 0.7055771232795044 | 0.7887849378299816 |
| 0.5637546745746400 | 0.6949587768866414 | 0.8504464063903793 |
| 0.6114451491393631 | 0.6317085505835340 | 0.7108715502896567 |

### The perfect Pd<sub>7</sub>-CO\*\_<sub>P</sub> surface

O In Pd In C O

|                      |                     |                    |  |  |  |
|----------------------|---------------------|--------------------|--|--|--|
| 1.000000000000000    |                     |                    |  |  |  |
| 14.4443000000000001  | 0.000000000000000   | 0.000000000000000  |  |  |  |
| -7.22214999999999965 | 12.5091307398835685 | 0.000000000000000  |  |  |  |
| 0.00000000000000011  | 0.00000000000000019 | 17.985499999999983 |  |  |  |

|    |    |    |    |   |   |
|----|----|----|----|---|---|
| O  | In | Pd | In | C | O |
| 71 | 27 | 1  | 20 | 1 | 2 |

Direct

|                    |                    |                    |
|--------------------|--------------------|--------------------|
| 0.8416815294673986 | 0.6128177706341962 | 0.4570049869398242 |
| 0.5150039704291691 | 0.9516345760687757 | 0.2904942403167435 |
| 0.1709025368219585 | 0.2804214020884780 | 0.6201057631522955 |
| 0.7920455644064456 | 0.9603735301152105 | 0.2989664900778817 |
| 0.4709098220344835 | 0.2941984700876101 | 0.6505121098020578 |
| 0.1314936562602615 | 0.6251738441979198 | 0.4687482446763072 |
| 0.3003225354821068 | 0.7308535843743055 | 0.3004394738566925 |
| 0.9782014879020186 | 0.0718053510870806 | 0.6356564434583299 |
| 0.6398940037337415 | 0.4053682563101999 | 0.4662123252041319 |
| 0.5285246657000825 | 0.2093428783452078 | 0.2708416297935303 |
| 0.1795562675585373 | 0.5386989613117622 | 0.6085528604847094 |
| 0.8568988441568477 | 0.8823203569573222 | 0.4419501476087779 |
| 0.8866586832058653 | 0.1290737804662350 | 0.4565643979425847 |
| 0.5471024915423219 | 0.4629662156844668 | 0.2912995387116590 |
| 0.2222889227568858 | 0.7911955978991894 | 0.6209466565853600 |
| 0.5387064415691044 | 0.7317052460980016 | 0.2992166249937880 |
| 0.2066338028746451 | 0.0772725683977066 | 0.6571166547851089 |
| 0.8750896418300091 | 0.4075247589508750 | 0.4683542490788888 |
| 0.7667426263133127 | 0.4683128750645537 | 0.3004925496976719 |
| 0.4358293987680332 | 0.8024002388603468 | 0.6423722717119551 |
| 0.0940604733252883 | 0.1339211158569938 | 0.4642707059538754 |
| 0.2899418859885038 | 0.2188262873498835 | 0.2699809624963485 |
| 0.9572486880997768 | 0.5436730122167276 | 0.6115029132218471 |
| 0.6162902114225750 | 0.8721460678520836 | 0.4436914633407720 |
| 0.3724631741578501 | 0.6585322102904679 | 0.4583239145167906 |
| 0.0363229894788146 | 0.9833334037560757 | 0.2891603463976997 |
| 0.7097996319083784 | 0.3293767028432626 | 0.6203030827440879 |
| 0.7672326226412346 | 0.7065272796446970 | 0.2995622431367826 |
| 0.4234766565177367 | 0.0275232526412708 | 0.6537691377942187 |
| 0.0897694517811779 | 0.3640908339250715 | 0.4687921739264857 |
| 0.0299928528351507 | 0.1977889978322622 | 0.2997104389104522 |
| 0.6914568075209107 | 0.5237060498167567 | 0.6372857229630863 |
| 0.3649184016914848 | 0.8581933121690991 | 0.4676519151017596 |
| 0.2807112127265697 | 0.9702302650985141 | 0.2695335280322492 |
| 0.9546134456577273 | 0.3165700870978815 | 0.6116878548471183 |

|                    |                    |                    |
|--------------------|--------------------|--------------------|
| 0.6246648055470725 | 0.6448638516347883 | 0.4439337029790253 |
| 0.2262361976645869 | 0.3173126818238790 | 0.3784857659642236 |
| 0.8836493873943539 | 0.6484509081671190 | 0.7105369241017272 |
| 0.5572602118488554 | 0.9856633837701583 | 0.5452936741456742 |
| 0.2666801079199121 | 0.9744352957597903 | 0.5314783924376620 |
| 0.9271477983059045 | 0.3054316233418004 | 0.3428452988147830 |
| 0.7580944549996668 | 0.1939917904679843 | 0.5351839041436394 |
| 0.4223913218560952 | 0.5288320717416830 | 0.3656339315071871 |
| 0.1000534352657436 | 0.8671590160485969 | 0.6996786867960275 |
| 0.5424758877414162 | 0.7175680265253918 | 0.5638491257472669 |
| 0.2151815544472779 | 0.0586453025144006 | 0.3878985981662492 |
| 0.8698745673872855 | 0.3917157079429250 | 0.7313257364719120 |
| 0.1827053297478829 | 0.8096257137113737 | 0.3794594269772767 |
| 0.8554049311914522 | 0.1413513905278529 | 0.7120693533412134 |
| 0.5118339861975153 | 0.4707951949982202 | 0.5431879915380250 |
| 0.5255587674876683 | 0.1914777074106568 | 0.5306821016282914 |
| 0.1938765251626515 | 0.5217430179865065 | 0.3502297715070103 |
| 0.8631914489864640 | 0.8698770437340302 | 0.7025306073380191 |
| 0.3027388790689427 | 0.4628870471274478 | 0.5339836565758804 |
| 0.9710048247558898 | 0.7931106291580566 | 0.3646242991380131 |
| 0.6324412358085806 | 0.1362181299921881 | 0.7024055119161945 |
| 0.7837290828461114 | 0.7263271451129665 | 0.5588260946723470 |
| 0.4391655143912711 | 0.0544998049969394 | 0.3893581013556605 |
| 0.1080308354135901 | 0.3806670392904791 | 0.7298832195209395 |
| 0.6902653863191920 | 0.2722427471613802 | 0.3795238774795341 |
| 0.3472753953487545 | 0.6040390995523855 | 0.7130145948264984 |
| 0.0295320430850237 | 0.9420382586215026 | 0.5439332212299375 |
| 0.3059048498173981 | 0.2311590444077816 | 0.5307219468916627 |
| 0.9773515477806248 | 0.5714111627078656 | 0.3437510712241903 |
| 0.6434430912869153 | 0.9114175917649714 | 0.7027020492135863 |
| 0.0359158679350905 | 0.7407502819537846 | 0.5355041599621565 |
| 0.7049253924045304 | 0.0756546993916853 | 0.3658471554391436 |
| 0.3668321515616270 | 0.3992282858406319 | 0.6997492566023723 |
| 0.7757561593479636 | 0.9575277517302495 | 0.5584951416820196 |
| 0.4430534985333603 | 0.2834025987291119 | 0.3896548867260567 |
| 0.1163521986449260 | 0.6286424314721778 | 0.7296844043971977 |
| 0.1395273925577599 | 0.1449311139395179 | 0.3318190104703727 |
| 0.8104483442978749 | 0.4821417615877164 | 0.6755307586337000 |
| 0.5982666775481564 | 0.6233808237914548 | 0.3233962311027831 |
| 0.2561889386194964 | 0.9542837192903425 | 0.6531283638513636 |
| 0.9239986478787174 | 0.2897124167779615 | 0.4964189187275392 |
| 0.4701775028513799 | 0.8105868900225105 | 0.5156204854603754 |
| 0.3538029508925379 | 0.8939409346682098 | 0.3326830454862479 |
| 0.0182100450397766 | 0.2315370100010428 | 0.6749628755033652 |

|                    |                    |                    |
|--------------------|--------------------|--------------------|
| 0.8759992213088258 | 0.8750231529132034 | 0.3220364055281816 |
| 0.5459524920529826 | 0.2022656632663661 | 0.6523336917395274 |
| 0.2072162368449135 | 0.5330994966665379 | 0.4932069586865109 |
| 0.6885934960062126 | 0.5588941310109002 | 0.5139067148001281 |
| 0.6046761063489674 | 0.3591626293109166 | 0.3339578257580543 |
| 0.2662823427330602 | 0.6843088725105944 | 0.6743454894953724 |
| 0.6240068607641350 | 0.9003456324958530 | 0.3231981564558907 |
| 0.2981743346445079 | 0.2436596284631954 | 0.6525199028118568 |
| 0.9644273161939296 | 0.5740274968559884 | 0.4960055518822717 |
| 0.9414145972686002 | 0.0303000943092390 | 0.5126859084294478 |
| 0.9309549973689812 | 0.7892716253836158 | 0.4871474017469054 |
| 0.4737970313890226 | 0.3083482767887494 | 0.5058741868949679 |
| 0.1440410594688149 | 0.6453462056936919 | 0.3474120042165374 |
| 0.8064386867930292 | 0.9813994065437291 | 0.6787615231528393 |
| 0.5872998583037090 | 0.1179554923193360 | 0.3263621516571667 |
| 0.2550283524366634 | 0.4501727000713222 | 0.6646213691667934 |
| 0.7105345326658244 | 0.0406014511807560 | 0.4882538562292602 |
| 0.1901948059723905 | 0.0640171954124473 | 0.5034826413914935 |
| 0.8540554387118768 | 0.3990074026134294 | 0.3466997838257492 |
| 0.5248130213837472 | 0.7261683585688600 | 0.6769475770783311 |
| 0.3807947657577827 | 0.3688368271454696 | 0.3261546736307307 |
| 0.0447195867802213 | 0.7051780877586314 | 0.6669932469167805 |
| 0.4573137806418964 | 0.5690374956919709 | 0.4886655235479582 |
| 0.4346760390044545 | 0.0246158470858048 | 0.5055128415677478 |
| 0.0987927967660025 | 0.3537444170930126 | 0.3472749076657511 |
| 0.7758899334044431 | 0.7013522057620762 | 0.6786918697158281 |
| 0.1302752219245421 | 0.9110078461976497 | 0.3247865266361709 |
| 0.7946640969084396 | 0.2421451295862224 | 0.6692215462458341 |
| 0.7001835313056843 | 0.3003422289201408 | 0.5000907063181322 |
| 0.7007889419972207 | 0.8006841946232088 | 0.5024699702860693 |
| 0.1985570829662374 | 0.2982890398369971 | 0.4990774836977988 |
| 0.2001474614850764 | 0.7993383133085604 | 0.5003617987726476 |
| 0.8693668266064930 | 0.1276095596431699 | 0.3353843555020629 |
| 0.5266239392664019 | 0.4727253256302196 | 0.6640369876539831 |
| 0.3722357789142210 | 0.6426130775913643 | 0.3367871313619275 |
| 0.0295676973941769 | 0.9581410606320429 | 0.6652072424617551 |
| 0.3661451816424205 | 0.1326836543520344 | 0.3144131759960624 |
| 0.0315724278078766 | 0.4665611614384766 | 0.6857476310831282 |
| 0.8571705956261740 | 0.6289763385652866 | 0.3354792957625169 |
| 0.5465478769164293 | 0.9748719931549136 | 0.6666422418424935 |
| 0.5113267822951203 | 0.7341973960690563 | 0.7809439366507180 |
| 0.5072587643619367 | 0.7405015782928230 | 0.8442625585653414 |
| 0.6060728539382962 | 0.6408732689410345 | 0.6981561289927393 |

### The perfect Pd<sub>7</sub>-H<sub>2</sub>\*\_P surface

O In Pd In H

|                     |                     |                     |  |  |
|---------------------|---------------------|---------------------|--|--|
| 1.000000000000000   |                     |                     |  |  |
| 14.4442996979000000 | 0.000000000000000   | 0.000000000000000   |  |  |
| -7.2221498489000000 | 12.5091304781999995 | 0.000000000000000   |  |  |
| 0.000000000000000   | 0.000000000000000   | 17.9855003356999994 |  |  |

|    |    |    |    |   |
|----|----|----|----|---|
| O  | In | Pd | In | H |
| 72 | 27 | 1  | 20 | 2 |

Direct

|                    |                    |                    |
|--------------------|--------------------|--------------------|
| 0.8418355296563490 | 0.6130268573910553 | 0.4569417145581388 |
| 0.5156539590447528 | 0.9525606381402861 | 0.2889772078599699 |
| 0.1710795340070884 | 0.2798140964220704 | 0.6189028876636872 |
| 0.7934077740509137 | 0.9614116154770009 | 0.2973143133413897 |
| 0.4713755687638280 | 0.2946567835799773 | 0.6484459507274040 |
| 0.1318472196895554 | 0.6248948703021752 | 0.4686789378270252 |
| 0.3005602126403961 | 0.7313945426024878 | 0.2992763060117296 |
| 0.9782366927233342 | 0.0709693110066788 | 0.6347977040137393 |
| 0.6405292035285146 | 0.4059451627899891 | 0.4673621587146909 |
| 0.5289911369648740 | 0.2101062032297092 | 0.2708538024505365 |
| 0.1815720735742024 | 0.5386924606421548 | 0.6092188560868624 |
| 0.8577932818619737 | 0.8826971472539297 | 0.4406915354694787 |
| 0.8875309316239216 | 0.1299405551503944 | 0.4552492717993501 |
| 0.5476161246424281 | 0.4628660693355767 | 0.2904191660462647 |
| 0.2216420596326293 | 0.7902906568599238 | 0.6204403989716775 |
| 0.5391548950300963 | 0.7319554626122158 | 0.2976072926226576 |
| 0.2068267667516388 | 0.0765610594566146 | 0.6560730680522487 |
| 0.8754190390334674 | 0.4075259221379268 | 0.4684651652259739 |
| 0.7671636030269533 | 0.4687549081184249 | 0.3005138679884736 |
| 0.4339342937032774 | 0.8031453925909462 | 0.6440544443910767 |
| 0.0946127467667621 | 0.1340196871163436 | 0.4631427784117031 |
| 0.2909578459356193 | 0.2191903550142140 | 0.2700175592278410 |
| 0.9577146577706637 | 0.5434200840707221 | 0.6114229405643142 |
| 0.6181163132226279 | 0.8748341165944771 | 0.4403089433687042 |
| 0.3707789357917665 | 0.6583029036608355 | 0.4562164975913184 |
| 0.0373467668186270 | 0.9838859321536271 | 0.2886068383123406 |
| 0.7094542316794834 | 0.3289535457068144 | 0.6207612386614458 |
| 0.7683477920263877 | 0.7071341631227871 | 0.2980274610313475 |
| 0.4239563884166663 | 0.0270157980152653 | 0.6521571249258146 |
| 0.0906460886222841 | 0.3650988327684760 | 0.4682107693307717 |
| 0.0311782513502319 | 0.1987662561057556 | 0.2987275433536201 |
| 0.6894677936601029 | 0.5249290320601292 | 0.6386507514342470 |
| 0.3653870202290844 | 0.8585503583402245 | 0.4671110354895698 |
| 0.2812614272280062 | 0.9707059471069180 | 0.2690902603307370 |
| 0.9551541081890211 | 0.3160833008490504 | 0.6113411178870674 |

|                    |                    |                    |
|--------------------|--------------------|--------------------|
| 0.6263172370212090 | 0.6442068542901844 | 0.4416103312792886 |
| 0.2268531455495664 | 0.3179041622404722 | 0.3779279023437598 |
| 0.8829302312013503 | 0.6491745621655622 | 0.7088080179998316 |
| 0.5582811394941651 | 0.9847035186781040 | 0.5447127941321515 |
| 0.2668674478266110 | 0.9741088161957160 | 0.5308269419695185 |
| 0.9280936764994919 | 0.3064003829091369 | 0.3423534873849117 |
| 0.6009576302339268 | 0.6454633132275830 | 0.6996673980265578 |
| 0.7586868014213950 | 0.1941535708754074 | 0.5347234222068755 |
| 0.4229944093973508 | 0.5295057901227945 | 0.3643205000135337 |
| 0.1005384811737623 | 0.8669351297106032 | 0.6994209711532930 |
| 0.5438435787332617 | 0.7205237858449912 | 0.5571272712811359 |
| 0.2159294026703223 | 0.0588322734508131 | 0.3875639748892377 |
| 0.8700672298190815 | 0.3913647916598537 | 0.7304996902186456 |
| 0.1834173760129391 | 0.8097421328208779 | 0.3790469491343405 |
| 0.8528540318524235 | 0.1377046402927117 | 0.7096453435182556 |
| 0.5119245385784831 | 0.4727028518516714 | 0.5432485104860824 |
| 0.5265213864920337 | 0.1911849055752497 | 0.5301419953587564 |
| 0.1939306972866147 | 0.5220986132962518 | 0.3481434778892815 |
| 0.8633075389948622 | 0.8692512882673901 | 0.7020716781043715 |
| 0.3036264798022196 | 0.4633226433372680 | 0.5330674735408990 |
| 0.9716220084408093 | 0.7934056374077261 | 0.3641971981916856 |
| 0.6325431689269423 | 0.1338139906276520 | 0.7014425149538585 |
| 0.7831475781679264 | 0.7267915877547679 | 0.5584836794028630 |
| 0.4399797633879816 | 0.0543784356791680 | 0.3890164899562092 |
| 0.1100841322343927 | 0.3808309130457896 | 0.7285829020114403 |
| 0.6906623338783282 | 0.2729972274670244 | 0.3795312657518657 |
| 0.3647329816152585 | 0.6101934933973383 | 0.7028754817632601 |
| 0.0297846440111193 | 0.9420489991112906 | 0.5431129636091412 |
| 0.3060628532403911 | 0.2311418564206842 | 0.5298850530975345 |
| 0.9777033780755715 | 0.5717968684672797 | 0.3446075098489024 |
| 0.6372398243322397 | 0.8948331277773688 | 0.6967073071309861 |
| 0.0360868432747944 | 0.7406330279928027 | 0.5351087544195345 |
| 0.7064193783128876 | 0.0774688699008363 | 0.3636654812080324 |
| 0.3656361729528857 | 0.3975202666959529 | 0.7002479306046620 |
| 0.7765670350584736 | 0.9581700436331442 | 0.5564216441871849 |
| 0.4441647812387454 | 0.2844206915716633 | 0.3904475092239709 |
| 0.1183528664605767 | 0.6281977501253402 | 0.7294869044823739 |
| 0.1402730858523352 | 0.1453521515016707 | 0.3314205033898265 |
| 0.8099510425956309 | 0.4827222981825938 | 0.6753587169692433 |
| 0.5991039649877599 | 0.6236391245274380 | 0.3215460517144316 |
| 0.2564437730597093 | 0.9537216364032113 | 0.6524977537011617 |
| 0.9247184195390805 | 0.2899659273736763 | 0.4956555444009708 |
| 0.4715551851898787 | 0.8112551751570780 | 0.5124516616118642 |
| 0.3544991363337808 | 0.8943747731419113 | 0.3316679931641953 |

|                    |                    |                    |
|--------------------|--------------------|--------------------|
| 0.0181449213792320 | 0.2302782100910516 | 0.6741098026757373 |
| 0.8768806152266017 | 0.8754738055780835 | 0.3208155610620211 |
| 0.5454303958580299 | 0.2012886231720137 | 0.6517752065342157 |
| 0.2080426475476902 | 0.5336354064158529 | 0.4929630624027761 |
| 0.6886119844091562 | 0.5596997877963161 | 0.5140583975115129 |
| 0.6051168467511683 | 0.3596936276510208 | 0.3344251400364040 |
| 0.2673963583376163 | 0.6843500687350722 | 0.6740341335268517 |
| 0.6250891926463058 | 0.9013486176007074 | 0.3203536547995278 |
| 0.2986853662022030 | 0.2430064312660017 | 0.6517660093938179 |
| 0.9646429178135202 | 0.5742299587623386 | 0.4955811329077943 |
| 0.9420882485930051 | 0.0307161045440564 | 0.5115743396503939 |
| 0.9308323153793161 | 0.7890978214334430 | 0.4869405089519206 |
| 0.4747788720177160 | 0.3094149834892795 | 0.5073371782108442 |
| 0.1445745589798568 | 0.6455960006023419 | 0.3470498925104384 |
| 0.8042854917049648 | 0.9775705149134223 | 0.6766328312649911 |
| 0.5879867946881279 | 0.1187297432389474 | 0.3256476440369225 |
| 0.2569932991693233 | 0.4500532795378819 | 0.6625193608643816 |
| 0.7113879443208277 | 0.0412960432586219 | 0.4863494767352702 |
| 0.1906704301196721 | 0.0640269123512495 | 0.5030878065030522 |
| 0.8544598800717110 | 0.3994327320977247 | 0.3466463599709062 |
| 0.5168134778458691 | 0.7296181832967024 | 0.6778949113434903 |
| 0.3817389941135588 | 0.3691400737747992 | 0.3261409539780881 |
| 0.0446795037617837 | 0.7048996614772426 | 0.6665239656915906 |
| 0.4582723958872635 | 0.5704457676262444 | 0.4868150919749159 |
| 0.4351989958886093 | 0.0245032191639348 | 0.5053936023640042 |
| 0.0996690179261667 | 0.3545548417953192 | 0.3464695534477605 |
| 0.7713138391888682 | 0.7007666882376581 | 0.6790582516551401 |
| 0.1309142676601680 | 0.9112226127101578 | 0.3244561732596550 |
| 0.7947192364599213 | 0.2417519435804082 | 0.6679691123787694 |
| 0.7004868362323509 | 0.3004682510124905 | 0.5000136648478442 |
| 0.7012902095831167 | 0.8011640618261551 | 0.4996971246951735 |
| 0.1992632362470377 | 0.2984713224298455 | 0.4982045884341822 |
| 0.2003801567086226 | 0.7993347160385724 | 0.4999182237152819 |
| 0.8705030448097308 | 0.1286349884274448 | 0.3339386797565819 |
| 0.5254737765134335 | 0.4781847980657842 | 0.6645536615866101 |
| 0.3723133081418951 | 0.6427015484805680 | 0.3349416681507688 |
| 0.0293914585576302 | 0.9571968252386545 | 0.6644998367942062 |
| 0.3668865037499616 | 0.1330712753750522 | 0.3147359147549467 |
| 0.0318285490121088 | 0.4659131250946945 | 0.6851655988132257 |
| 0.8575092583239905 | 0.6294199742716289 | 0.3353464129486292 |
| 0.5477327489801014 | 0.9732770439506742 | 0.6659245203166794 |
| 0.6165040411006639 | 0.6493687246179526 | 0.8982083067002300 |
| 0.5875638167192270 | 0.6529019817539667 | 0.8654993998514678 |

**The perfect Pd<sub>7</sub>-[TS-2H]\* surface**

| O                   | In | Pd                  | In | H                   |
|---------------------|----|---------------------|----|---------------------|
| 1.000000000000000   |    |                     |    |                     |
| 14.4442996979000000 |    | 0.0000000000000000  |    | 0.0000000000000000  |
| -7.2221498489000000 |    | 12.5091304781999995 |    | 0.0000000000000000  |
| 0.0000000000000000  |    | 0.0000000000000000  |    | 17.9855003356999994 |

| O  | In | Pd | In | H |
|----|----|----|----|---|
| 72 | 27 | 1  | 20 | 2 |

**Direct**

|                    |                    |                    |
|--------------------|--------------------|--------------------|
| 0.8414023715542516 | 0.6139662452752095 | 0.4578150741984702 |
| 0.5157840347319683 | 0.9534856826866489 | 0.2893615335224048 |
| 0.1691508220854187 | 0.2798148898423534 | 0.6180161329100489 |
| 0.7929582320234632 | 0.9621350440337942 | 0.2980558616072156 |
| 0.4690039224882429 | 0.2913679456839864 | 0.6507051214040547 |
| 0.1320316361003197 | 0.6258701211998708 | 0.4691140839300697 |
| 0.3011135093504269 | 0.7321882907140778 | 0.3004211862104748 |
| 0.9782425970485612 | 0.0721255895553349 | 0.6350018566552083 |
| 0.6399702885156375 | 0.4067622994028151 | 0.4674701768945109 |
| 0.5290109852281726 | 0.2109298164789663 | 0.2708652832258158 |
| 0.1819855359115286 | 0.5399474556520875 | 0.6097605565472362 |
| 0.8572187398099326 | 0.8834815976096710 | 0.4414592991442581 |
| 0.8873101066366869 | 0.1308673659992840 | 0.4560790486483962 |
| 0.5474017386170080 | 0.4638536357012342 | 0.2912784016933052 |
| 0.2220407761315937 | 0.7910185913409604 | 0.6207444650098753 |
| 0.5389971854690476 | 0.7324597695091134 | 0.2991980829876686 |
| 0.2059595028155412 | 0.0764105482354632 | 0.6560116360323306 |
| 0.8750130140412746 | 0.4086776176464119 | 0.4690673572435915 |
| 0.7672098783615175 | 0.4697994352207804 | 0.3009055673788055 |
| 0.4343970104719208 | 0.8058744208113787 | 0.6448594041952862 |
| 0.0940927375923901 | 0.1341063066014650 | 0.4628963549598813 |
| 0.2906181799414441 | 0.2201133737700493 | 0.2702263609129693 |
| 0.9585979994232844 | 0.5448522831614362 | 0.6119010464908635 |
| 0.6179515224286591 | 0.8755357751735471 | 0.4414740607490934 |
| 0.3711187013237473 | 0.6588575694052385 | 0.4579838830730545 |
| 0.0368368894546883 | 0.9844119698587976 | 0.2889515414458841 |
| 0.7091130476118935 | 0.3305760247455509 | 0.6214145654748799 |
| 0.7675827542834534 | 0.7077921689337142 | 0.2995875328732479 |
| 0.4239899499031967 | 0.0278997214589411 | 0.6540138282897664 |
| 0.0903394627374512 | 0.3661103769001005 | 0.4684091427590368 |
| 0.0305836975709799 | 0.1994890291367181 | 0.2991191890951718 |
| 0.6917958178874642 | 0.5283852948835681 | 0.6388591386648733 |
| 0.3657119702248252 | 0.8594267962296724 | 0.4675850809426378 |
| 0.2810934618987732 | 0.9712935123080253 | 0.2692074908455120 |
| 0.9551809265669364 | 0.3175181397860415 | 0.6116519486316788 |



|                    |                    |                    |
|--------------------|--------------------|--------------------|
| 0.6255921970146836 | 0.6443559991535240 | 0.4438656958471322 |
| 0.2263239284293279 | 0.3185733722833127 | 0.3780155045138142 |
| 0.8847578164142339 | 0.6506170398228210 | 0.7097310327277138 |
| 0.5582314593956934 | 0.9861753430353806 | 0.5453878273903865 |
| 0.2674061126884218 | 0.9751507105866213 | 0.5313882730262585 |
| 0.9276693185688626 | 0.3071754264883660 | 0.3432835337636048 |
| 0.6048258554354731 | 0.6547518295977034 | 0.7044699682745323 |
| 0.7584734459547526 | 0.1954494204786006 | 0.5354363823222461 |
| 0.4230743959727651 | 0.5298189842203572 | 0.3664904800420656 |
| 0.1009551841691003 | 0.8677772313069598 | 0.6998487014800868 |
| 0.5440287313821797 | 0.7213698613575971 | 0.5594037821314892 |
| 0.2159015534305790 | 0.0594552257127770 | 0.3875717645647899 |
| 0.8707828916328847 | 0.3928910437299397 | 0.7308859613688544 |
| 0.1834969688066881 | 0.8107079726757975 | 0.3794206947187372 |
| 0.8535048447085473 | 0.1394980167458684 | 0.7104362337074084 |
| 0.5118803062641810 | 0.4718123084403978 | 0.5467688257150677 |
| 0.5259864598642334 | 0.1921025763033353 | 0.5308280577925147 |
| 0.1940645197152106 | 0.5229384201194924 | 0.3485612591952389 |
| 0.8649420911268091 | 0.8716072776357806 | 0.7031490169012222 |
| 0.3029273835379553 | 0.4632099749102481 | 0.5335095068459128 |
| 0.9714299442798935 | 0.7942995348592520 | 0.3647875141499785 |
| 0.6335282189863517 | 0.1355013835734321 | 0.7023399909311729 |
| 0.7836845745911886 | 0.7285958771545533 | 0.5595694820823602 |
| 0.4398350926681138 | 0.0553465227450624 | 0.3890289276146230 |
| 0.1111423692665317 | 0.3823009254042415 | 0.7285823022444163 |
| 0.6904263477500041 | 0.2738687752795222 | 0.3799792917320987 |
| 0.3663197505403346 | 0.6124539434383710 | 0.7026133987367554 |
| 0.0297911343175424 | 0.9429037895539855 | 0.5435041728676394 |
| 0.3056219042506547 | 0.2313581309291610 | 0.5300426046593780 |
| 0.9777082382813246 | 0.5729041830242491 | 0.3454809176421601 |
| 0.6380478399264018 | 0.8979536809874464 | 0.6985853731836130 |
| 0.0363804148832377 | 0.7418326748466139 | 0.5353273239334896 |
| 0.7060249485722726 | 0.0781766006831930 | 0.3647155703776799 |
| 0.3631374651487911 | 0.3957106174848137 | 0.6991681942232741 |
| 0.7762220137292702 | 0.9592128014837201 | 0.5575405472801188 |
| 0.4437038332119667 | 0.2846541524532396 | 0.3902647473699321 |
| 0.1193168077092121 | 0.6293536877929686 | 0.7302507608730695 |
| 0.1397954797677180 | 0.1459596102953420 | 0.3315617855593275 |
| 0.8109806323777227 | 0.4842962879316882 | 0.6758122012929971 |
| 0.5985676691479054 | 0.6241477636586898 | 0.3235848000792652 |
| 0.2566738871793394 | 0.9543355899783698 | 0.6529638956890612 |
| 0.9245351774241258 | 0.2911875977254024 | 0.4960452821630482 |
| 0.4715676032830176 | 0.8119876310753030 | 0.5137431157612632 |
| 0.3545010707217455 | 0.8951724304296544 | 0.3319379710159269 |

|                    |                    |                    |
|--------------------|--------------------|--------------------|
| 0.0183447173760644 | 0.2317633990694291 | 0.6742461167851277 |
| 0.8764552101576079 | 0.8762582918676830 | 0.3216173628012994 |
| 0.5456951705904876 | 0.2013620563103227 | 0.6524554402281776 |
| 0.2079340134070010 | 0.5343504159140335 | 0.4936371138392295 |
| 0.6882937337747898 | 0.5601465783978362 | 0.5155573870593746 |
| 0.6050223814611005 | 0.3604587855825881 | 0.3344732557428181 |
| 0.2681972302072427 | 0.6853957100899254 | 0.6746805330493519 |
| 0.6247423844853596 | 0.9019717886156747 | 0.3214356004236230 |
| 0.2954346255380156 | 0.2422676970389490 | 0.6516333192909686 |
| 0.9648061113560809 | 0.5754669888224171 | 0.4960092119308201 |
| 0.9419035542684058 | 0.0315925640383273 | 0.5122209569747148 |
| 0.9307068563721762 | 0.7900598730410969 | 0.4874518619231684 |
| 0.4739777939291835 | 0.3097286671472621 | 0.5067990034628724 |
| 0.1447215231842473 | 0.6464620782744279 | 0.3475756185855577 |
| 0.8052764681558495 | 0.9794588413704062 | 0.6775395860239950 |
| 0.5880227885477657 | 0.1196475230384205 | 0.3259640992491406 |
| 0.2582204621709596 | 0.4515221028491181 | 0.6624152560310512 |
| 0.7112833302567383 | 0.0424042591238246 | 0.4872675741502597 |
| 0.1903613507330623 | 0.0642653774917334 | 0.5030362632161269 |
| 0.8543180159374243 | 0.4004647243030515 | 0.3472447553836798 |
| 0.5189379632512029 | 0.7354648089119882 | 0.6804715494810255 |
| 0.3814173100938373 | 0.3700289710709374 | 0.3265835747329786 |
| 0.0459946060518375 | 0.7060478999376137 | 0.6671479398235606 |
| 0.4584162150706129 | 0.5704347413889164 | 0.4899513307532816 |
| 0.4353184632169256 | 0.0255211130512791 | 0.5052255068224601 |
| 0.0992968700303432 | 0.3553855876573362 | 0.3467219666847312 |
| 0.7755481664753788 | 0.7036773410576922 | 0.6793861957759744 |
| 0.1306531785527680 | 0.9118553529199286 | 0.3247173035027651 |
| 0.7952886690958788 | 0.2434278340340683 | 0.6685159142059078 |
| 0.7002513785672834 | 0.3017092509948048 | 0.5006066301547177 |
| 0.7010482014126209 | 0.8021720746733932 | 0.5010660795588073 |
| 0.1982254615659400 | 0.2986224090270413 | 0.4981055201656316 |
| 0.2006378953403070 | 0.8001789537318744 | 0.5003089523083978 |
| 0.8700809034188368 | 0.1293217728132379 | 0.3347592239878417 |
| 0.5258472495649517 | 0.4658356297959073 | 0.6690461972168725 |
| 0.3725026667708808 | 0.6431345739372616 | 0.3367267538674677 |
| 0.0300752697949862 | 0.9585346957115830 | 0.6648863307082904 |
| 0.3666211355930893 | 0.1337911434635682 | 0.3144516975929768 |
| 0.0326857500564675 | 0.4672200773273689 | 0.6856829664275164 |
| 0.8571592488886487 | 0.6302761073664360 | 0.3361962084263951 |
| 0.5476576380810875 | 0.9753732614692575 | 0.6666962423087338 |
| 0.5727862995363617 | 0.5217215489082661 | 0.7807138066956073 |
| 0.5856075892231888 | 0.5865973766628774 | 0.7587308822639670 |

### The perfect Pd<sub>7</sub>-2H\* surface

O In Pd In H

|                     |                     |                     |  |  |
|---------------------|---------------------|---------------------|--|--|
| 1.000000000000000   |                     |                     |  |  |
| 14.4442996979000000 | 0.0000000000000000  | 0.0000000000000000  |  |  |
| -7.2221498489000000 | 12.5091304781999995 | 0.0000000000000000  |  |  |
| 0.0000000000000000  | 0.0000000000000000  | 17.9855003356999994 |  |  |

|    |    |    |    |   |
|----|----|----|----|---|
| O  | In | Pd | In | H |
| 72 | 27 | 1  | 20 | 2 |

Direct

|                    |                    |                    |
|--------------------|--------------------|--------------------|
| 0.8410226998491716 | 0.6139608333427317 | 0.4577559497204612 |
| 0.5154765491147865 | 0.9528440250690631 | 0.2880543467259313 |
| 0.1659469703499030 | 0.2782479198677020 | 0.6160483404675787 |
| 0.7919753897135300 | 0.9611058668397111 | 0.2969923522621902 |
| 0.4647481020889892 | 0.2858341506072365 | 0.6448253911936054 |
| 0.1317581385882557 | 0.6252520740130405 | 0.4685037482942793 |
| 0.3012231491988802 | 0.7306685479885177 | 0.3003724787924450 |
| 0.9769371058652903 | 0.0709017494881349 | 0.6340020358558107 |
| 0.6389110411079384 | 0.4066832849528491 | 0.4676703613882823 |
| 0.5283506084350619 | 0.2109763118268649 | 0.2708257002754413 |
| 0.1821103880616607 | 0.5391002185971876 | 0.6090521933892359 |
| 0.8566668539837622 | 0.8832118747625337 | 0.4402119775186423 |
| 0.8864353189116035 | 0.1305226761138712 | 0.4550167395147546 |
| 0.5464125293146518 | 0.4626633643773151 | 0.2915375562668140 |
| 0.2218892747517382 | 0.7906900621578856 | 0.6197713598464364 |
| 0.5382516829581936 | 0.7308713374772339 | 0.2993218966815824 |
| 0.2051115291098549 | 0.0759103677351308 | 0.6541534416362225 |
| 0.8745283199926027 | 0.4083774130068121 | 0.4684249148461340 |
| 0.7658863368680046 | 0.4689821788027066 | 0.3012250471598094 |
| 0.4326024930709668 | 0.8065442899759059 | 0.6431735667411533 |
| 0.0925715694429844 | 0.1327052187828364 | 0.4608924012199588 |
| 0.2904411996246605 | 0.2195129773799546 | 0.2700600045640391 |
| 0.9592024688021473 | 0.5450182945014075 | 0.6114387631602490 |
| 0.6176174377314441 | 0.8750860873831259 | 0.4404560729157884 |
| 0.3713226538172214 | 0.6576074093579030 | 0.4586988285685610 |
| 0.0359955798435746 | 0.9832324073638675 | 0.2874369417555930 |
| 0.7082209665743012 | 0.3309671504864202 | 0.6211155857563326 |
| 0.7662700142986446 | 0.7066423520420904 | 0.2998879814051156 |
| 0.4234524235014932 | 0.0270609196978141 | 0.6538258738980612 |
| 0.0890704537640532 | 0.3653424583733637 | 0.4672563900203029 |
| 0.0293500204603427 | 0.1983274399746363 | 0.2977007369704101 |
| 0.6996714356917075 | 0.5347715945502290 | 0.6365423883598758 |
| 0.3653356240478542 | 0.8588525528840407 | 0.4663300461870373 |
| 0.2805090475254678 | 0.9704234788935701 | 0.2678684953211168 |
| 0.9544926162728695 | 0.3172638176683441 | 0.6109143967996691 |

|                    |                    |                    |
|--------------------|--------------------|--------------------|
| 0.6247491923165889 | 0.6429915045096660 | 0.4450760721208351 |
| 0.2245824491439705 | 0.3175864788843594 | 0.3766329342529773 |
| 0.8891647403005372 | 0.6508879281423440 | 0.7128290748388064 |
| 0.5576370291491392 | 0.9856473030867889 | 0.5440644955745938 |
| 0.2674258290923258 | 0.9748427663632915 | 0.5300510483427520 |
| 0.9266479657055469 | 0.3063973670365723 | 0.3417027335044671 |
| 0.6114003290088543 | 0.6661010987875933 | 0.7089792896680078 |
| 0.7578913492832416 | 0.1951561732808477 | 0.5350204005285504 |
| 0.4230510854228137 | 0.5284645971152410 | 0.3683246365023358 |
| 0.1011255102707442 | 0.8679080323451667 | 0.6987628995664822 |
| 0.5447746963960183 | 0.7223297057951272 | 0.5597759808275992 |
| 0.2147971563782352 | 0.0579454261446107 | 0.3862978102227627 |
| 0.8709516790731099 | 0.3923215941031007 | 0.7302871892567356 |
| 0.1829453588728470 | 0.8096595326649871 | 0.3780666897361838 |
| 0.8524225224198918 | 0.1385406774941673 | 0.7091940455170640 |
| 0.5139317437885618 | 0.4728925069365013 | 0.5532622751443207 |
| 0.5264694076811933 | 0.1908748761672663 | 0.5293641534041710 |
| 0.1937222782089937 | 0.5219106399548793 | 0.3486316414647667 |
| 0.8651684312500980 | 0.8712603595622163 | 0.7030982818003860 |
| 0.3016509570156178 | 0.4615347514274570 | 0.5328685324823366 |
| 0.9708979559951915 | 0.7935783739040031 | 0.3637025296327402 |
| 0.6333724180325033 | 0.1359577201590457 | 0.7018193061202304 |
| 0.7854241636118079 | 0.7317577302253159 | 0.5590820296871929 |
| 0.4388384004458227 | 0.0539919141825022 | 0.3873095803741203 |
| 0.1108320591847882 | 0.3816636612026061 | 0.7277668147767717 |
| 0.6897464025146325 | 0.2730219278321743 | 0.3797504946815546 |
| 0.3668417019885149 | 0.6142744966964071 | 0.7022867765799281 |
| 0.0296304940269259 | 0.9427582597061294 | 0.5423015578962134 |
| 0.3032501643234160 | 0.2310456860296669 | 0.5281115784872259 |
| 0.9771733194277488 | 0.5719898158821106 | 0.3446825026675573 |
| 0.6367597299163580 | 0.8997045874261473 | 0.6974131252444833 |
| 0.0364700593111056 | 0.7418018037656263 | 0.5343819071972712 |
| 0.7052369610869160 | 0.0774884409131903 | 0.3636387681993044 |
| 0.3603021922998834 | 0.3934423049185480 | 0.6976933442098595 |
| 0.7755761619577849 | 0.9590731449794347 | 0.5564656132112538 |
| 0.4428078733311690 | 0.2840713581371634 | 0.3918385433235613 |
| 0.1194986024815312 | 0.6285867945974309 | 0.7299627310741825 |
| 0.1387057879162245 | 0.1448195078015176 | 0.3302432205021765 |
| 0.8119887321910388 | 0.4845881242690100 | 0.6759265609527012 |
| 0.5974362229963737 | 0.6224279838723462 | 0.3245646645724273 |
| 0.2565114342828956 | 0.9544380088806909 | 0.6516233234761881 |
| 0.9237183435127799 | 0.2907108020555934 | 0.4953516408625498 |
| 0.4714776138945572 | 0.8115889758212742 | 0.5120508627702596 |
| 0.3538793898935839 | 0.8939809523699523 | 0.3302452846093101 |

|                    |                    |                    |
|--------------------|--------------------|--------------------|
| 0.0172134277519423 | 0.2310939711510464 | 0.6733439813532761 |
| 0.8756762591559011 | 0.8753449794731203 | 0.3204968907395917 |
| 0.5450242305703157 | 0.2001697552775392 | 0.6511556524773281 |
| 0.2075080659609828 | 0.5333591866002136 | 0.4926645126697490 |
| 0.6880414278245852 | 0.5598460703071602 | 0.5168363505342769 |
| 0.6037788833240196 | 0.3597045163074922 | 0.3357405987735030 |
| 0.2669519762534834 | 0.6844358577840957 | 0.6736509752379520 |
| 0.6238716543629259 | 0.9008193031174830 | 0.3203327669431231 |
| 0.2924132406869052 | 0.2417221408106465 | 0.6495867939302229 |
| 0.9644288403319775 | 0.5751305079710175 | 0.4955391049089924 |
| 0.9412183202363159 | 0.0309924528967424 | 0.5108404528291157 |
| 0.9308706745516722 | 0.7900822620571027 | 0.4862140851887930 |
| 0.4735868550166527 | 0.3106755022679728 | 0.5093508374039847 |
| 0.1442412803405021 | 0.6453328548686887 | 0.3468688357816922 |
| 0.8046961269805190 | 0.9788604925327202 | 0.6759819187935474 |
| 0.5875093583740940 | 0.1192486515459848 | 0.3248789790776180 |
| 0.2583042208373416 | 0.4507931521581964 | 0.6614663653036066 |
| 0.7107847337412551 | 0.0424406796671953 | 0.4861377427764152 |
| 0.1899378448079996 | 0.0639452119164814 | 0.5016285366689289 |
| 0.8533872777877254 | 0.3996974978777614 | 0.3466013183961654 |
| 0.5167328554061582 | 0.7398294143767014 | 0.6803919334475942 |
| 0.3807613169308314 | 0.3688936271759083 | 0.3275178166466830 |
| 0.0475472152350705 | 0.7060736714693294 | 0.6667739156330175 |
| 0.4588194018886118 | 0.5684181612008843 | 0.4929869140818255 |
| 0.4350285155348730 | 0.0252319008502642 | 0.5032435547968978 |
| 0.0979106876587651 | 0.3543080816004645 | 0.3455108257175430 |
| 0.7840067745221317 | 0.7047577479496924 | 0.6772974978517599 |
| 0.1300194519004566 | 0.9107298943011451 | 0.3232337944032326 |
| 0.7947823341532386 | 0.2434285336977206 | 0.6675409536526079 |
| 0.6995401928453311 | 0.3016366434461681 | 0.5001697962440879 |
| 0.7009183595620631 | 0.8021370681383175 | 0.5001808338048185 |
| 0.1962005733823245 | 0.2973074809752285 | 0.4965824725776175 |
| 0.2003601783452283 | 0.7997628110748554 | 0.4989914535999462 |
| 0.8691356237912701 | 0.1284561658135616 | 0.3335524431168035 |
| 0.5294182426346324 | 0.4562532962358088 | 0.6796955317008129 |
| 0.3723148658860205 | 0.6414076349428232 | 0.3375807400104727 |
| 0.0305591568383687 | 0.9590478359806957 | 0.6636473750145150 |
| 0.3659474604917513 | 0.1330597248725611 | 0.3141653329338531 |
| 0.0326084546024781 | 0.4664982761893873 | 0.6851264009881480 |
| 0.8562223193750036 | 0.6292945102988333 | 0.3361365902147678 |
| 0.5470553564440767 | 0.9768562990840048 | 0.6650641176479526 |
| 0.5767501567086923 | 0.4650641860067235 | 0.7717796069347255 |
| 0.6026046125707598 | 0.6547752425542614 | 0.7623854486943579 |

### The perfect Pd<sub>7</sub>-[TS-H<sub>2</sub>O]\* surface

O In Pd In H

|                     |                     |                     |  |  |
|---------------------|---------------------|---------------------|--|--|
| 1.000000000000000   |                     |                     |  |  |
| 14.4442996979000000 | 0.0000000000000000  | 0.0000000000000000  |  |  |
| -7.2221498489000000 | 12.5091304781999995 | 0.0000000000000000  |  |  |
| 0.0000000000000000  | 0.0000000000000000  | 17.9855003356999994 |  |  |

|    |    |    |    |   |
|----|----|----|----|---|
| O  | In | Pd | In | H |
| 72 | 27 | 1  | 20 | 2 |

Direct

|                    |                    |                    |
|--------------------|--------------------|--------------------|
| 0.8407869403414945 | 0.6124859262650746 | 0.4575696096000471 |
| 0.5153559528943483 | 0.9515675517777608 | 0.2880282464779580 |
| 0.1656597158001602 | 0.2772021294098108 | 0.6156552132733301 |
| 0.7918786627479297 | 0.9598667054367515 | 0.2974096363798192 |
| 0.4642895884214659 | 0.2856703839697035 | 0.6529708140678728 |
| 0.1319832491651618 | 0.6236598064682729 | 0.4682721570360885 |
| 0.3012076017676179 | 0.7299755687408811 | 0.3000754725746401 |
| 0.9768075019869016 | 0.0699870693957445 | 0.6338428944070050 |
| 0.6387033938705172 | 0.4051691135714760 | 0.4662399450669802 |
| 0.5280977436325589 | 0.2087551129775316 | 0.2693444296774815 |
| 0.1822163684300925 | 0.5381911202168065 | 0.6096855917643775 |
| 0.8556787954415799 | 0.8810389653229047 | 0.4407574654234444 |
| 0.8860878786427756 | 0.1288224308455878 | 0.4555432119491744 |
| 0.5460605087102592 | 0.4614928831852739 | 0.2895037917248394 |
| 0.2215650846673927 | 0.7888325033320965 | 0.6199642858476391 |
| 0.5384254441197408 | 0.7299142860380032 | 0.2993269012383040 |
| 0.2038856907658440 | 0.0728393568973168 | 0.6540684994515854 |
| 0.8737669121237317 | 0.4071249183427422 | 0.4682113179586169 |
| 0.7664979383859867 | 0.4679711851290954 | 0.2999127895818452 |
| 0.4324181062084715 | 0.8071937881668795 | 0.6441810163364564 |
| 0.0929229491520758 | 0.1315181653588344 | 0.4614083775173052 |
| 0.2893886322484426 | 0.2178935161494896 | 0.2690692658004928 |
| 0.9595955956518414 | 0.5438705453607557 | 0.6108410203612902 |
| 0.6171922839778828 | 0.8741826229627890 | 0.4409920353526397 |
| 0.3701056802231481 | 0.6561159013066272 | 0.4580989134200182 |
| 0.0358130458196423 | 0.9820247832920859 | 0.2880637358993936 |
| 0.7076847533742544 | 0.3307225466005084 | 0.6199435738016851 |
| 0.7664885940910469 | 0.7054619371103696 | 0.2991039040338866 |
| 0.4231471216022893 | 0.0275090045565261 | 0.6546811976298995 |
| 0.0898775959256205 | 0.3649737800877709 | 0.4672240708272291 |
| 0.0293007883282214 | 0.1973190894578959 | 0.2981893350754334 |
| 0.6975865602900997 | 0.5334750795641382 | 0.6389674491020402 |
| 0.3659942196541742 | 0.8572384493691461 | 0.4671546337023209 |
| 0.2802629144177399 | 0.9688991135358024 | 0.2678588805937511 |
| 0.9543426615355500 | 0.3164294566462112 | 0.6102058477871133 |

|                    |                    |                    |
|--------------------|--------------------|--------------------|
| 0.6257454442803627 | 0.6404048444734759 | 0.4441603203981510 |
| 0.2251583291985705 | 0.3162946443089305 | 0.3768738984878368 |
| 0.8898560546666768 | 0.6488652887005356 | 0.7128507985281423 |
| 0.5575381138957058 | 0.9851923405848380 | 0.5448390367923764 |
| 0.2673229753112372 | 0.9731739672926056 | 0.5302642014092591 |
| 0.9265744158783762 | 0.3050241571342907 | 0.3434316753033354 |
| 0.6277063289441646 | 0.6922441721210789 | 0.7293385943933609 |
| 0.7574188826384598 | 0.1942419490484350 | 0.5345523069761948 |
| 0.4230627665677348 | 0.5273234391369021 | 0.3673426202670170 |
| 0.1004111454956901 | 0.8657979155416085 | 0.6988089016245296 |
| 0.5444736598661808 | 0.7181517373261660 | 0.5589260994012009 |
| 0.2152820196581600 | 0.0571429570006533 | 0.3863297769580881 |
| 0.8703169746955280 | 0.3909517778327353 | 0.7297029562604245 |
| 0.1831837576386849 | 0.8085682750724789 | 0.3783098946619732 |
| 0.8527205904804255 | 0.1384147633383249 | 0.7090696202675979 |
| 0.5114736971052631 | 0.4675806676066027 | 0.5495677955750377 |
| 0.5242611734469895 | 0.1906032054234882 | 0.5300278618308709 |
| 0.1935266220225001 | 0.5206745382330746 | 0.3463110200788129 |
| 0.8664113220254567 | 0.8715631962424506 | 0.7039831952591998 |
| 0.3025091347090699 | 0.4605436237540873 | 0.5335555105798983 |
| 0.9707478687289993 | 0.7922575324545460 | 0.3637955691541858 |
| 0.6336265788373694 | 0.1368883151894523 | 0.7020369968030141 |
| 0.7849234846448299 | 0.7290806788128702 | 0.5596835322247835 |
| 0.4390759884400767 | 0.0532131816485990 | 0.3875172567850742 |
| 0.1101572804347123 | 0.3803732118635290 | 0.7278474705759246 |
| 0.6891650240703842 | 0.2719759934493039 | 0.3788038021072129 |
| 0.3673462608074611 | 0.6141411262023280 | 0.7029914049476733 |
| 0.0291029095615491 | 0.9410067609196315 | 0.5423998815033803 |
| 0.3042308393129113 | 0.2289982200821103 | 0.5292129568400715 |
| 0.9770872331017868 | 0.5709626103287215 | 0.3453543497760113 |
| 0.6376610143827200 | 0.9039161286967807 | 0.7013239467777372 |
| 0.0365474967093889 | 0.7403915637014292 | 0.5340297871115309 |
| 0.7051820239694887 | 0.0764172515002302 | 0.3638412885551349 |
| 0.3536646805836583 | 0.3865361066038605 | 0.7017472239093160 |
| 0.7747197574279098 | 0.9570158403233365 | 0.5571005897357070 |
| 0.4426447999286578 | 0.2824168864744480 | 0.3887187051113222 |
| 0.1192588336280017 | 0.6270914607996768 | 0.7303058575466170 |
| 0.1386164161569935 | 0.1436135066704600 | 0.3305764354632023 |
| 0.8124304124981312 | 0.4832066239467044 | 0.6747084277425751 |
| 0.5975829384566759 | 0.6211840722853490 | 0.3239269300958312 |
| 0.2560914557700013 | 0.9521130251082961 | 0.6518609351616304 |
| 0.9237379625962070 | 0.2898155804984645 | 0.4945412341174426 |
| 0.4714958803017589 | 0.8089658675434741 | 0.5143306526280880 |
| 0.3540081684102135 | 0.8928599998291172 | 0.3306395629672284 |

|                    |                    |                    |
|--------------------|--------------------|--------------------|
| 0.0171012976299826 | 0.2303936423006467 | 0.6728398425239743 |
| 0.8753623866406749 | 0.8740303106807619 | 0.3208658147667418 |
| 0.5450110223076398 | 0.2004388662063239 | 0.6515672997922203 |
| 0.2079923019932264 | 0.5324558703066617 | 0.4936595793612870 |
| 0.6878407529537678 | 0.5577623183258017 | 0.5162988730546539 |
| 0.6039371939187029 | 0.3584504759815171 | 0.3327604035028611 |
| 0.2677588510817839 | 0.6835173608097597 | 0.6748620681771385 |
| 0.6236451718126300 | 0.8996157297201016 | 0.3209850199298846 |
| 0.2892809863451928 | 0.2376625016849666 | 0.6506078070005124 |
| 0.9647172951689771 | 0.5739910023381398 | 0.4947931409309027 |
| 0.9407663731119279 | 0.0293464174754829 | 0.5111223599273818 |
| 0.9307046057260084 | 0.7885561502249273 | 0.4861387625141138 |
| 0.4723533938402792 | 0.3081628669479117 | 0.5049524256351535 |
| 0.1444247640091831 | 0.6440423766777347 | 0.3467139024404785 |
| 0.8044672349206270 | 0.9786702238407418 | 0.6761639814466800 |
| 0.5873665918514958 | 0.1177254520250696 | 0.3245585547161033 |
| 0.2583933283442474 | 0.4508137709654598 | 0.6625199186760304 |
| 0.7101746356354698 | 0.0407632542140775 | 0.4865582722113500 |
| 0.1895862694342529 | 0.0618892055442365 | 0.5016643739416098 |
| 0.8533647653958629 | 0.3985821900089821 | 0.3465025679654498 |
| 0.5180986828691122 | 0.7450298626135218 | 0.6880468649004686 |
| 0.3802564884957259 | 0.3679930717840131 | 0.3255633806323550 |
| 0.0484250238537904 | 0.7045816124664382 | 0.6663763080269464 |
| 0.4589549419681208 | 0.5682190446662473 | 0.4918590916121134 |
| 0.4349735710271776 | 0.0237316855307138 | 0.5034290718687774 |
| 0.0983990042691968 | 0.3534557900111577 | 0.3455712569935238 |
| 0.7880027856005243 | 0.7056291737560393 | 0.6775807813021251 |
| 0.1299836533474492 | 0.9095316753909120 | 0.3235799274252356 |
| 0.7946650838917068 | 0.2423826100075804 | 0.6666647960321356 |
| 0.6989130062144761 | 0.3002855369739176 | 0.4993324811708821 |
| 0.6992345058904197 | 0.7994766921307265 | 0.5006450924160852 |
| 0.1968002933626158 | 0.2965063891156309 | 0.4967763891638286 |
| 0.2008332262087107 | 0.7981544606827465 | 0.4991104516625718 |
| 0.8690283413279818 | 0.1270017223555721 | 0.3341009201791435 |
| 0.5209509525192790 | 0.4527198715460199 | 0.6732966393024933 |
| 0.3720661035289163 | 0.6404366418874570 | 0.3370800176008399 |
| 0.0305971179759098 | 0.9579772356926919 | 0.6637576429686541 |
| 0.3656037635109096 | 0.1315685338432006 | 0.3129398721451319 |
| 0.0325306516483113 | 0.4653728711532518 | 0.6851040299101229 |
| 0.8560467392720963 | 0.6281237206201152 | 0.3358380093863156 |
| 0.5462836997627574 | 0.9773641176931965 | 0.6658696869652438 |
| 0.5723921814633482 | 0.5713032315561685 | 0.7347139844624464 |
| 0.6437891842707318 | 0.7185337616085246 | 0.7804034755397594 |



### The perfect Pd<sub>7</sub>-H<sub>2</sub>O\* surface

O In Pd In H

|                     |                     |                     |  |  |
|---------------------|---------------------|---------------------|--|--|
| 1.000000000000000   |                     |                     |  |  |
| 14.4442996979000000 | 0.0000000000000000  | 0.0000000000000000  |  |  |
| -7.2221498489000000 | 12.5091304781999995 | 0.0000000000000000  |  |  |
| 0.0000000000000000  | 0.0000000000000000  | 17.9855003356999994 |  |  |

|    |    |    |    |   |
|----|----|----|----|---|
| O  | In | Pd | In | H |
| 72 | 27 | 1  | 20 | 2 |

Direct

|                    |                    |                    |
|--------------------|--------------------|--------------------|
| 0.8462022803346535 | 0.6119794206326056 | 0.4517360180086172 |
| 0.5177644409186249 | 0.9517574978474886 | 0.2866049297227136 |
| 0.1728331223520172 | 0.2803719218358455 | 0.6179440200164265 |
| 0.7943512279663756 | 0.9593385468914054 | 0.2973838074315892 |
| 0.4623606644797157 | 0.2823574870837933 | 0.6605284007963805 |
| 0.1331919040753284 | 0.6228084976763946 | 0.4657969532911034 |
| 0.3033693093398745 | 0.7309156014272317 | 0.2973283416514630 |
| 0.9769839765769835 | 0.0677560273523797 | 0.6352125009714059 |
| 0.6412984739032577 | 0.4045485634961524 | 0.4594475173958782 |
| 0.5299699816795034 | 0.2069345543665336 | 0.2653748677062183 |
| 0.1864222065139112 | 0.5407924511979771 | 0.6078524034846400 |
| 0.8556935248241728 | 0.8770189577366383 | 0.4413639347749940 |
| 0.8872601536016663 | 0.1273701177691757 | 0.4558620118797866 |
| 0.5477352470258430 | 0.4611288356816656 | 0.2837658634030025 |
| 0.2223598661928153 | 0.7901363300012278 | 0.6187590848640566 |
| 0.5406101643198560 | 0.7304541628503167 | 0.2951763348526183 |
| 0.2054250136290892 | 0.0746713313764842 | 0.6507277691257791 |
| 0.8756337772279112 | 0.4069582168141936 | 0.4654800261145355 |
| 0.7696730292233475 | 0.4675745001406351 | 0.2954524112095007 |
| 0.4315293832015821 | 0.8061951478841688 | 0.6391643562051398 |
| 0.0956111788325326 | 0.1326279872913452 | 0.4641538465209992 |
| 0.2904710737931178 | 0.2173128217578038 | 0.2658702173140385 |
| 0.9575725967383292 | 0.5398445068657648 | 0.6093991572259341 |
| 0.6194415807901431 | 0.8753047410966126 | 0.4395323478070552 |
| 0.3707155664910555 | 0.6557140846259324 | 0.4540684025646347 |
| 0.0380766689182837 | 0.9826262428133108 | 0.2879256492214159 |
| 0.7050468556238433 | 0.3405094726276238 | 0.6169335274955442 |
| 0.7712032794473199 | 0.7056136582926972 | 0.2941278729610534 |
| 0.4247360430427972 | 0.0284259124295161 | 0.6538473166747008 |
| 0.0949331906398536 | 0.3661643350374350 | 0.4666952078878103 |
| 0.0318934480226225 | 0.1973824118964767 | 0.2978151266175175 |
| 0.6819079938162045 | 0.5369901974185127 | 0.6845822811317596 |
| 0.3691317481370578 | 0.8568233678773123 | 0.4664210427731775 |
| 0.2823169915168149 | 0.9689483526696833 | 0.2666809866680606 |
| 0.9582108989043119 | 0.3155550857430378 | 0.6078456353857009 |

|                    |                    |                    |
|--------------------|--------------------|--------------------|
| 0.6292622401370267 | 0.6416156890451428 | 0.4349873142614394 |
| 0.2284918952928197 | 0.3154641078132618 | 0.3763054661297677 |
| 0.8947176787833722 | 0.6475840356367044 | 0.7078894183274620 |
| 0.5601844435743881 | 0.9861122739642860 | 0.5439992646448921 |
| 0.2694897017135815 | 0.9734081648600950 | 0.5287544896009605 |
| 0.9296167190880609 | 0.3043225139310956 | 0.3463019670604138 |
| 0.5650452278630873 | 0.6800788767395126 | 0.7864408938362211 |
| 0.7599387551710544 | 0.1966554209690178 | 0.5344719891162449 |
| 0.4252330688303824 | 0.5271262247918935 | 0.3628577010502889 |
| 0.1005512381648477 | 0.8659396599768929 | 0.6971881727511924 |
| 0.5468950791406292 | 0.7132201164486225 | 0.5527921827571397 |
| 0.2180518045239571 | 0.0590606484757281 | 0.3859427088772683 |
| 0.8703808134002816 | 0.3866943357567106 | 0.7278976072657459 |
| 0.1856842315071572 | 0.8088059577238325 | 0.3770615488299491 |
| 0.8542805930495833 | 0.1378155987856996 | 0.7073496800982254 |
| 0.5235380028626411 | 0.4700939337846048 | 0.5447025366367459 |
| 0.5263731158467804 | 0.1923850033977136 | 0.5284076642439250 |
| 0.1958533882753684 | 0.5205752324427443 | 0.3425163473751258 |
| 0.8598649571732835 | 0.8663995537791256 | 0.7024375427791082 |
| 0.3087043363771823 | 0.4624938703958600 | 0.5332992252007017 |
| 0.9737547884631482 | 0.7928189685530815 | 0.3623532224446798 |
| 0.6366428627461210 | 0.1395286948427025 | 0.6979599362181205 |
| 0.7806929146829045 | 0.7130997993898085 | 0.5585562584446732 |
| 0.4417409938901562 | 0.0541781402942393 | 0.3861597685281623 |
| 0.1120218969831291 | 0.3808762620431335 | 0.7265306801325937 |
| 0.6915707490621030 | 0.2722011783032336 | 0.3757440486132825 |
| 0.3569588835957178 | 0.6141840640622946 | 0.7162993526863244 |
| 0.0287805517225998 | 0.9386716113747602 | 0.5418786229959563 |
| 0.3103757293628718 | 0.2326301048775875 | 0.5287557390796441 |
| 0.9801811686250329 | 0.5702654273502021 | 0.3386300214862185 |
| 0.6344109098626615 | 0.9049158959628976 | 0.7070502802225661 |
| 0.0383139495839649 | 0.7386040111564880 | 0.5329626367490689 |
| 0.7079107857746708 | 0.0770659761124624 | 0.3630341815738315 |
| 0.3674114815545911 | 0.4003492414184964 | 0.6996714917531255 |
| 0.7749165965348809 | 0.9546259093402949 | 0.5570712134203889 |
| 0.4455480755014644 | 0.2829047090704009 | 0.3826190357908664 |
| 0.1166145877465829 | 0.6256120755825841 | 0.7280808100420794 |
| 0.1414443656509800 | 0.1439969911804141 | 0.3295947253739332 |
| 0.8118358412575614 | 0.4812257274705176 | 0.6788974510738773 |
| 0.6005228695418389 | 0.6219566284070049 | 0.3157030067624025 |
| 0.2574736782503732 | 0.9535684156116213 | 0.6504871155134115 |
| 0.9270458310416111 | 0.2903632653167785 | 0.4915483681735577 |
| 0.4740745003901382 | 0.8063355998053873 | 0.5145862679147668 |
| 0.3566948374035352 | 0.8931296719711976 | 0.3296516770694812 |

|                    |                    |                    |
|--------------------|--------------------|--------------------|
| 0.0198644526827996 | 0.2297897781316710 | 0.6722632438396011 |
| 0.8774925507769327 | 0.8733218161004215 | 0.3198915271249465 |
| 0.5464679090306255 | 0.2017483975116638 | 0.6500555061656991 |
| 0.2118804982559883 | 0.5338049311426774 | 0.4919129821861514 |
| 0.6903645175495302 | 0.5594642773097783 | 0.4994368171342357 |
| 0.6068442764075801 | 0.3580068863643228 | 0.3253872348634694 |
| 0.2668402768356392 | 0.6853975426854186 | 0.6750008649403937 |
| 0.6257580182939022 | 0.8997016824248497 | 0.3200315107544309 |
| 0.2942750558071696 | 0.2407198108603632 | 0.6507375559763221 |
| 0.9669627424120811 | 0.5720729094606977 | 0.4940032831171478 |
| 0.9415842586649200 | 0.0277900452341019 | 0.5114348002749800 |
| 0.9334131326981878 | 0.7869374668592647 | 0.4841315892590578 |
| 0.4747057876047711 | 0.3065018576800435 | 0.4973244617888443 |
| 0.1468992823390356 | 0.6440429573731944 | 0.3437585652528002 |
| 0.7997380787953871 | 0.9765268896199467 | 0.6759567887245728 |
| 0.5898004859459207 | 0.1174875951207190 | 0.3227610153310954 |
| 0.2614882170286862 | 0.4558313473610148 | 0.6627003584630466 |
| 0.7115419527539709 | 0.0408955262328991 | 0.4857305217936214 |
| 0.1919864348462577 | 0.0628699953192019 | 0.5019839193159442 |
| 0.8561135712169294 | 0.3983106112760191 | 0.3434426555069972 |
| 0.5032532881699617 | 0.7489873464891951 | 0.7056974118821107 |
| 0.3817680620811297 | 0.3683242417997923 | 0.3207944003669679 |
| 0.0507730458267620 | 0.7045506563631306 | 0.6618287803237368 |
| 0.4620715741693230 | 0.5700789669026445 | 0.4862179143346187 |
| 0.4375652446832012 | 0.0233818549371686 | 0.5020038071983355 |
| 0.1022938202686136 | 0.3537667825006431 | 0.3445138511269781 |
| 0.7932627032737973 | 0.7043622132813029 | 0.6775609313404900 |
| 0.1329134949316872 | 0.9107271868854181 | 0.3230919060733005 |
| 0.7972014611184552 | 0.2409276475959306 | 0.6634307227062273 |
| 0.7019753759518905 | 0.3016544441869590 | 0.4968176311227761 |
| 0.6989050528435147 | 0.7973424671258217 | 0.4985469728415515 |
| 0.2013449657553719 | 0.2983706182962598 | 0.4967651733977763 |
| 0.2038146156858656 | 0.7980340358722843 | 0.4971588338572044 |
| 0.8714821147814678 | 0.1262832070552617 | 0.3338203746279912 |
| 0.5218107519676229 | 0.4506083052227891 | 0.6642290473567249 |
| 0.3739655250657337 | 0.6406940439793881 | 0.3332885245415999 |
| 0.0310310229891771 | 0.9575743172954325 | 0.6630422413605712 |
| 0.3675865074268628 | 0.1313996578994034 | 0.3095977366126896 |
| 0.0332684247253566 | 0.4645636868217725 | 0.6823749770000832 |
| 0.8623218882654790 | 0.6290623760972088 | 0.3295603634487475 |
| 0.5461202376028549 | 0.9771433296487575 | 0.6647714595480841 |
| 0.4971084521089927 | 0.6253720934712512 | 0.8071296258677548 |
| 0.6004096873100804 | 0.7327171667066851 | 0.8253816767721532 |

### The perfect Ir<sub>7</sub> doped c-In<sub>2</sub>O<sub>3</sub>(111) surface

O In Ir In

|                     |                     |                     |  |
|---------------------|---------------------|---------------------|--|
| 1.000000000000000   |                     |                     |  |
| 12.5091307398835667 | -7.2221499999999965 | 0.0000000000000000  |  |
| 0.0000000000000000  | 14.4442999999999984 | 0.0000000000000000  |  |
| 0.0000000000000000  | 0.0000000000000000  | 17.9854999999999947 |  |

|    |    |    |    |
|----|----|----|----|
| O  | In | Ir | In |
| 72 | 27 | 1  | 20 |

Direct

|                    |                    |                    |
|--------------------|--------------------|--------------------|
| 0.8412183493326871 | 0.6134256089854724 | 0.4572607516087472 |
| 0.5155383221612666 | 0.9526556765873172 | 0.2896663718169518 |
| 0.1710293724076490 | 0.2794829879938180 | 0.6199361326671938 |
| 0.7931605262595287 | 0.9614772730635558 | 0.2978463313945106 |
| 0.4709862818547187 | 0.2947098051164862 | 0.6526104469456790 |
| 0.1340836050902652 | 0.6255787213521072 | 0.4706080861061782 |
| 0.3005879575931430 | 0.7314559412019827 | 0.3002802948996090 |
| 0.9779069291723251 | 0.0702682449664077 | 0.6359251152920923 |
| 0.6404593834754743 | 0.4065011512921829 | 0.4671159993198591 |
| 0.5293813227024012 | 0.2100706235989122 | 0.2699680158271793 |
| 0.1879237281975580 | 0.5405331272198650 | 0.6126053993869029 |
| 0.8591633206024968 | 0.8845332104650536 | 0.4409617900057108 |
| 0.8878716615648533 | 0.1302040560766328 | 0.4564349005540534 |
| 0.5481549336612485 | 0.4634672392805547 | 0.2904356432071252 |
| 0.2204147039418573 | 0.7908590318528950 | 0.6204493020346005 |
| 0.5387953956092273 | 0.7318414940413710 | 0.2979084117024299 |
| 0.2065396118325982 | 0.0765049963995085 | 0.6556577179048663 |
| 0.8746554644516147 | 0.4076034490796816 | 0.4698415697196276 |
| 0.7683165490156920 | 0.4687866869028101 | 0.3001094690769771 |
| 0.4316691907053891 | 0.7999176154293433 | 0.6387557429026837 |
| 0.0951027279919223 | 0.1344620810362385 | 0.4641048797605590 |
| 0.2903432078153259 | 0.2190080173042014 | 0.2695373892047543 |
| 0.9592981944637068 | 0.5433680550202182 | 0.6117520847702058 |
| 0.6180710033401111 | 0.8735461377022266 | 0.4412587768984671 |
| 0.3751857613143478 | 0.6583736101099824 | 0.4576146245252248 |
| 0.0372894796898410 | 0.9842102110621740 | 0.2887268319634302 |
| 0.7087660815532343 | 0.3284367414654216 | 0.6217351407836381 |
| 0.7674914139656080 | 0.7069908702144094 | 0.2996901341922464 |
| 0.4232080031777057 | 0.0265831901518256 | 0.6534916157303886 |
| 0.0923925539027806 | 0.3664608083403180 | 0.4700530763318179 |
| 0.0316123498919595 | 0.1995392612707124 | 0.2995903274821922 |
| 0.6904598238549463 | 0.5246837572903542 | 0.6384276396018467 |
| 0.3642739986300234 | 0.8596764196617154 | 0.4651097148902542 |
| 0.2808971429906627 | 0.9705240440088394 | 0.2692206501003682 |
| 0.9562017338192268 | 0.3160475132647966 | 0.6121421892453666 |

|                    |                    |                    |
|--------------------|--------------------|--------------------|
| 0.6232528076469998 | 0.6460834925001584 | 0.4438609175205597 |
| 0.2277652625857257 | 0.3181333444500042 | 0.3789539638180726 |
| 0.8827497954181590 | 0.6481923100978417 | 0.7090511161560061 |
| 0.5574855161746477 | 0.9862824847608154 | 0.5434306258456038 |
| 0.2671665327100641 | 0.9745561163595269 | 0.5311973503574501 |
| 0.9287546088984312 | 0.3065308991988129 | 0.3459846161012022 |
| 0.5990797708633172 | 0.6443166594044627 | 0.6952897759360883 |
| 0.7591735694282978 | 0.1950364010059015 | 0.5357297894435782 |
| 0.4224763843059430 | 0.5284820609062416 | 0.3638092520317219 |
| 0.1003182654924849 | 0.8666299802269498 | 0.7005777803403567 |
| 0.5463847346781920 | 0.7271319735470980 | 0.5646055347044561 |
| 0.2160150081383413 | 0.0591620250896050 | 0.3879246256935295 |
| 0.8700071855011040 | 0.3901392665451990 | 0.7307905611751131 |
| 0.1820402460199453 | 0.8092044120658662 | 0.3792654886387600 |
| 0.8508457291236285 | 0.1353117196082222 | 0.7098569767766345 |
| 0.5117347171071132 | 0.4718424845821698 | 0.5433899016613772 |
| 0.5255711929165252 | 0.1922832668162822 | 0.5313540307580512 |
| 0.1951071523695827 | 0.5227416196380734 | 0.3497303622109317 |
| 0.8622793071870483 | 0.8677940794478669 | 0.7028075559395354 |
| 0.3047928727219339 | 0.4638185781597528 | 0.5348689191562220 |
| 0.9711676258639614 | 0.7934735435266966 | 0.3642114224174626 |
| 0.6320855470075922 | 0.1314635332059574 | 0.7009087517461728 |
| 0.7833042646437560 | 0.7273177483162376 | 0.5583799660334982 |
| 0.4400615745255967 | 0.0559434597022312 | 0.3885192578812889 |
| 0.1103295054277887 | 0.3806292999222556 | 0.7299542183935700 |
| 0.6902584848777660 | 0.2730099967721832 | 0.3800745641037208 |
| 0.3757020091044598 | 0.6181582886471756 | 0.7070659608956483 |
| 0.0299304559422306 | 0.9419035078075459 | 0.5439054113424764 |
| 0.3071410996024196 | 0.2318810796971520 | 0.5306631117529016 |
| 0.9777956584688151 | 0.5716923641008638 | 0.3485247545410781 |
| 0.6290378913521498 | 0.8809326681174657 | 0.6940479926388841 |
| 0.0355880784899955 | 0.7402444796544607 | 0.5351755749848699 |
| 0.7062501601315654 | 0.0772384995197656 | 0.3647947429828801 |
| 0.3656887387794033 | 0.3990616607090422 | 0.7008256555159759 |
| 0.7757120070392097 | 0.9585427718177878 | 0.5577015698451232 |
| 0.4444086739099325 | 0.2842476848631580 | 0.3891465281693501 |
| 0.1180493456817178 | 0.6280886797306876 | 0.7303560049843130 |
| 0.1402796613102048 | 0.1454441068618610 | 0.3318033868990949 |
| 0.8107713255961889 | 0.4821155033976671 | 0.6755464998809321 |
| 0.5987922131043929 | 0.6239250823064090 | 0.3218731822792200 |
| 0.2559774837138306 | 0.9541305562869822 | 0.6531535032215344 |
| 0.9253909542003341 | 0.2907928939326375 | 0.4959948593594412 |
| 0.4709826247767994 | 0.8139394666552269 | 0.5097633317509681 |
| 0.3540748899503574 | 0.8946301987163788 | 0.3318285438785035 |

|                    |                    |                    |
|--------------------|--------------------|--------------------|
| 0.0176204996290534 | 0.2291976109267900 | 0.6750654771379805 |
| 0.8769768492996093 | 0.8759057091164546 | 0.3208558757663230 |
| 0.5450212223831581 | 0.2010351555743267 | 0.6531128461552499 |
| 0.2097086076406448 | 0.5345216927484271 | 0.4947962090830143 |
| 0.6888506196128135 | 0.5599926207042075 | 0.5145000353332652 |
| 0.6056246796444640 | 0.3596413277800263 | 0.3329605324845383 |
| 0.2669285525970866 | 0.6874424148202511 | 0.6751099321112045 |
| 0.6250054085027692 | 0.9014623192153183 | 0.3206707918976668 |
| 0.2988619033455963 | 0.2429727710323002 | 0.6526426570166316 |
| 0.9649415879125013 | 0.5744319480361808 | 0.4954168329474973 |
| 0.9429282365424130 | 0.0317493950025495 | 0.5129689547917087 |
| 0.9314578778392856 | 0.7897457062092037 | 0.4868575427501157 |
| 0.4745334737336149 | 0.3093158384614663 | 0.5054710032841551 |
| 0.1448569300525292 | 0.6455459006427055 | 0.3483607821294007 |
| 0.8032130158348388 | 0.9754820584280800 | 0.6776156955616681 |
| 0.5882724506417543 | 0.1190242092920130 | 0.3255855462542861 |
| 0.2565991071748456 | 0.4487248272518076 | 0.6644759299875417 |
| 0.7118966257210824 | 0.0425233361199172 | 0.4869022462087469 |
| 0.1906988284124137 | 0.0642456942675029 | 0.5036354825225221 |
| 0.8543517141732948 | 0.3991081817795246 | 0.3478294999136360 |
| 0.5146112683047281 | 0.7251468771500127 | 0.6708526940612434 |
| 0.3815369909567319 | 0.3686447128228679 | 0.3250809647986235 |
| 0.0442427967851124 | 0.7050262015804671 | 0.6668133357547391 |
| 0.4568029861711754 | 0.5664087454187412 | 0.4853802043989759 |
| 0.4345963313393612 | 0.0262381053304512 | 0.5043875830200102 |
| 0.1006526333350241 | 0.3549596468027754 | 0.3479082210352851 |
| 0.7715214660855155 | 0.6998341898648296 | 0.6787358702168051 |
| 0.1306066488722120 | 0.9114428412718212 | 0.3245784864015419 |
| 0.7942500598139817 | 0.2406320397930747 | 0.6677456940126252 |
| 0.7001781523654426 | 0.3009227002525851 | 0.5008181339679222 |
| 0.7043926086873109 | 0.8036279455683986 | 0.4995240285049582 |
| 0.1995003615532012 | 0.2983906234438338 | 0.4992467629906504 |
| 0.1998538174062449 | 0.8002453459621367 | 0.4999829863176574 |
| 0.8708647349993861 | 0.1285692338428858 | 0.3350237678709641 |
| 0.5258972732506422 | 0.4749262293007253 | 0.6647508062951294 |
| 0.3724232389131988 | 0.6425936962036146 | 0.3349033294118984 |
| 0.0291199110199382 | 0.9566422556030156 | 0.6654367770999796 |
| 0.3668152188040076 | 0.1331110438442268 | 0.3139558623053827 |
| 0.0317694118686651 | 0.4654355281295062 | 0.6864106217741943 |
| 0.8573839918450347 | 0.6292669459201240 | 0.3358247391635502 |
| 0.5443208881079922 | 0.9715584669967675 | 0.6642447496427573 |

### The perfect Ir<sub>7</sub>-O<sub>V6</sub> surface

O In Ir In

|                     |                    |                    |  |
|---------------------|--------------------|--------------------|--|
| 1.000000000000000   |                    |                    |  |
| 12.5091307398835667 | -7.222149999999965 | 0.000000000000000  |  |
| 0.000000000000000   | 14.444299999999984 | 0.000000000000000  |  |
| 0.000000000000000   | 0.000000000000000  | 17.985499999999947 |  |

|    |    |    |    |
|----|----|----|----|
| O  | In | Ir | In |
| 71 | 27 | 1  | 20 |

Direct

|                    |                    |                    |
|--------------------|--------------------|--------------------|
| 0.8413089264868142 | 0.6137307428281972 | 0.4573935621371188 |
| 0.5158038325338794 | 0.9526458488090517 | 0.2894446237706886 |
| 0.1691391396896500 | 0.2786377045912877 | 0.6190883844009843 |
| 0.7935491095381850 | 0.9618132086483038 | 0.2975256766381208 |
| 0.4696059120292094 | 0.2942585675889927 | 0.6514447609705455 |
| 0.1346187538765644 | 0.6257933979773590 | 0.4704324409737465 |
| 0.3010829480575546 | 0.7314721786652836 | 0.3003968810539289 |
| 0.9772592658145641 | 0.0699630124080367 | 0.6356068771690239 |
| 0.6404482592474515 | 0.4068002182580527 | 0.4677142201701359 |
| 0.5295743464035089 | 0.2103984663122908 | 0.2699858721386709 |
| 0.1856367094148347 | 0.5389285293008340 | 0.6122723411957212 |
| 0.8594701394622688 | 0.8842968651294832 | 0.4407852133773882 |
| 0.8882798286577217 | 0.1312928324987319 | 0.4557165477955627 |
| 0.5484797175312984 | 0.4637909460650531 | 0.2908689194297958 |
| 0.2204324008098219 | 0.7903220787166130 | 0.6206881590397140 |
| 0.5391618402984467 | 0.7319127894089713 | 0.2978822083374157 |
| 0.2066895803703322 | 0.0760352973239673 | 0.6568385205247510 |
| 0.8746804637836297 | 0.4071589095967467 | 0.4694208378986648 |
| 0.7684212160495013 | 0.4689540937884404 | 0.3002436542633816 |
| 0.4287014308195389 | 0.7983531206600210 | 0.6379089689822777 |
| 0.0952388542868075 | 0.1343225460854630 | 0.4630413380813858 |
| 0.2907201986528771 | 0.2194216594677521 | 0.2696314804003189 |
| 0.9593060355761587 | 0.5426012300058489 | 0.6109411919833996 |
| 0.6188319327300321 | 0.8742703494799863 | 0.4406610555229620 |
| 0.3749570665472127 | 0.6583639236356911 | 0.4579007180881912 |
| 0.0375703837741515 | 0.9841380194993463 | 0.2884776920573128 |
| 0.7074596653941009 | 0.3301379109771115 | 0.6213797897177298 |
| 0.7676633332762015 | 0.7071834622602337 | 0.2995420501951374 |
| 0.4235048093595501 | 0.0261809572436674 | 0.6536256673975420 |
| 0.0919370661276694 | 0.3664084765218443 | 0.4696750907843337 |
| 0.0319626751273829 | 0.1997373071977159 | 0.2991524025568748 |
| 0.6904574534197715 | 0.5327299145032123 | 0.6430742392453006 |
| 0.3649588862471377 | 0.8594780456672726 | 0.4651770570017897 |
| 0.2814146738529853 | 0.9706428983148100 | 0.2689602853306163 |
| 0.9550075810180383 | 0.3150526279217556 | 0.6124004673196379 |

|                    |                    |                    |
|--------------------|--------------------|--------------------|
| 0.6246623021081387 | 0.6464722909351935 | 0.4443715105713072 |
| 0.2278506870754494 | 0.3186022487986720 | 0.3787075295557292 |
| 0.8878743253941137 | 0.6476062012932465 | 0.7096409992836836 |
| 0.5578413606804860 | 0.9861052780478885 | 0.5433818880429095 |
| 0.2674747418066828 | 0.9743929921332226 | 0.5314122011896691 |
| 0.9289397676308059 | 0.3069574917308692 | 0.3441292512568155 |
| 0.7587531582766973 | 0.1951497367146479 | 0.5359087622319917 |
| 0.4235134259292145 | 0.5291094076244832 | 0.3650273157452116 |
| 0.1002113963140729 | 0.8665549747659245 | 0.6998516456919399 |
| 0.5497868222096622 | 0.7279268202663386 | 0.5642932497757380 |
| 0.2163365628609805 | 0.0589466260091069 | 0.3873998251121419 |
| 0.8689715552488635 | 0.3893155471564947 | 0.7306548762019189 |
| 0.1825557205253755 | 0.8094560456679388 | 0.3790957850938006 |
| 0.8500385401643022 | 0.1346494616898651 | 0.7101760452931019 |
| 0.5121226821382659 | 0.4716628781526628 | 0.5442401319935548 |
| 0.5254500010675826 | 0.1918394504490254 | 0.5311996062293906 |
| 0.1954913083887768 | 0.5228318050740314 | 0.3497051546492563 |
| 0.8642463822283183 | 0.8698308845653521 | 0.7037549091847819 |
| 0.3046239972523420 | 0.4635753703668385 | 0.5352522468731439 |
| 0.9716425697144671 | 0.7934947212652746 | 0.3637854825158316 |
| 0.6319627614071416 | 0.1324292453727376 | 0.7007321316939312 |
| 0.7855502230552353 | 0.7283549369049355 | 0.5589785771706069 |
| 0.4402148584702425 | 0.0557444733515265 | 0.3883845441810094 |
| 0.1083341935877899 | 0.3790535256938886 | 0.7302573028226643 |
| 0.6901956227952057 | 0.2730730083452061 | 0.3799400104212506 |
| 0.3683400574301794 | 0.6157866202550066 | 0.7099890230350160 |
| 0.0307822633102625 | 0.9426663597551541 | 0.5437260494950327 |
| 0.3060896240230221 | 0.2310712594646219 | 0.5306239349366896 |
| 0.9780232185344068 | 0.5719419863513492 | 0.3490797905829625 |
| 0.6298892821437745 | 0.8836824794536257 | 0.6908863254569305 |
| 0.0362570511447360 | 0.7403103629535258 | 0.5346976654165626 |
| 0.7065896664135811 | 0.0776687858155600 | 0.3642109419974813 |
| 0.3607225025811101 | 0.3956189563647008 | 0.7026257208812879 |
| 0.7776768898835971 | 0.9602058687156521 | 0.5563563690787753 |
| 0.4444277677971021 | 0.2841328537569078 | 0.3893136927917880 |
| 0.1160243093983871 | 0.6263269711789639 | 0.7310522302223299 |
| 0.1404458373979046 | 0.1455589778553352 | 0.3314703320028802 |
| 0.8110998824320158 | 0.4817406725443391 | 0.6751853721234468 |
| 0.5990059915090035 | 0.6241541721937864 | 0.3226146099027229 |
| 0.2563888968194740 | 0.9539225054274572 | 0.6533742713317746 |
| 0.9253433667031047 | 0.2908577456820218 | 0.4963933834299732 |
| 0.4724266434501964 | 0.8136232283248142 | 0.5096424474096249 |
| 0.3544935176249394 | 0.8946363338596902 | 0.3318331578048328 |
| 0.0162580087849366 | 0.2281348185266486 | 0.6753024525202378 |



|                    |                    |                    |
|--------------------|--------------------|--------------------|
| 0.8771396563744727 | 0.8760401596775444 | 0.3207231904166696 |
| 0.5442073168463077 | 0.2007053262926431 | 0.6529254749617254 |
| 0.2097821386006580 | 0.5342959537653036 | 0.4947500567088644 |
| 0.6887306591619340 | 0.5606017845770914 | 0.5146553650275676 |
| 0.6056805411822520 | 0.3598215707744795 | 0.3332985467099799 |
| 0.2639889934016010 | 0.6850569429508615 | 0.6760459420052308 |
| 0.6253615008300580 | 0.9015309828587246 | 0.3203962373760099 |
| 0.2962179612460460 | 0.2417034522540074 | 0.6525769829650688 |
| 0.9652056367841000 | 0.5742768007590607 | 0.4948029931164270 |
| 0.9434285678780904 | 0.0323064462279712 | 0.5121067078882598 |
| 0.9326694416156165 | 0.7904322723110445 | 0.4863135544640011 |
| 0.4740126581699982 | 0.3088289253567160 | 0.5057637611877823 |
| 0.1453354530037336 | 0.6456714216554402 | 0.3483498178026955 |
| 0.8012238254126379 | 0.9749224812819512 | 0.6764110298160498 |
| 0.5883193742208177 | 0.1190419568464165 | 0.3253691245262978 |
| 0.2542823831733368 | 0.4476759005107901 | 0.6646543422373702 |
| 0.7121300552959690 | 0.0429760203212070 | 0.4863824660491189 |
| 0.1909398633863899 | 0.0639243287016630 | 0.5028665245129332 |
| 0.8544551532198373 | 0.3991136536184798 | 0.3475987910474436 |
| 0.5060529791161672 | 0.7212240947632143 | 0.6715157358079966 |
| 0.3819372991383129 | 0.3691749452057407 | 0.3255792742178177 |
| 0.0465676483448620 | 0.7050466834192108 | 0.6659032415009712 |
| 0.4579993300411757 | 0.5683805291547677 | 0.4874427940494864 |
| 0.4350356996491617 | 0.0257592855017099 | 0.5043450661068892 |
| 0.1005208116694510 | 0.3550809173301897 | 0.3476137911609047 |
| 0.7838955426228649 | 0.7041166296752284 | 0.6786538722674638 |
| 0.1309980833902826 | 0.9113949002424488 | 0.3241407431859887 |
| 0.7935764948160274 | 0.2401947135773982 | 0.6678795209454269 |
| 0.7000104993292220 | 0.3009162927248915 | 0.5005717646585786 |
| 0.7047587450111351 | 0.8042693484519025 | 0.5004291360373780 |
| 0.1993193581548369 | 0.2984379613184149 | 0.4988048478949051 |
| 0.2006470161684152 | 0.8001694133517193 | 0.4998142344505330 |
| 0.8710974718759176 | 0.1291884854884413 | 0.3343642080522395 |
| 0.5217828289161391 | 0.4706607778040098 | 0.6662608039303106 |
| 0.3729046193184994 | 0.6425512638121317 | 0.3353636115054028 |
| 0.0313658497162232 | 0.9591313362987257 | 0.6652970692472066 |
| 0.3670689682021647 | 0.1332811092783239 | 0.3137947414412543 |
| 0.0305373815220764 | 0.4642029775859073 | 0.6865072052058880 |
| 0.8571337632557290 | 0.6292986922009077 | 0.3359817127258758 |
| 0.5462544790973849 | 0.9718320844569075 | 0.6644679916999232 |

### The perfect Ir<sub>7</sub>-O<sub>V6</sub>-bt-CO<sub>2</sub> surface

O In Ir In C O

|                     |  |  |  |                    |                    |
|---------------------|--|--|--|--------------------|--------------------|
| 1.000000000000000   |  |  |  |                    |                    |
| 12.5091307398835667 |  |  |  | -7.222149999999965 | 0.000000000000000  |
| 0.000000000000000   |  |  |  | 14.444299999999984 | 0.000000000000000  |
| 0.000000000000000   |  |  |  | 0.000000000000000  | 17.985499999999947 |

|    |    |    |    |   |   |
|----|----|----|----|---|---|
| O  | In | Ir | In | C | O |
| 71 | 27 | 1  | 20 | 1 | 2 |

Direct

|                    |                    |                    |
|--------------------|--------------------|--------------------|
| 0.8403017446047655 | 0.6139259442007029 | 0.4582251097072935 |
| 0.5155960140142613 | 0.9528557150388602 | 0.2889388479333861 |
| 0.1708711879184197 | 0.2780375825370421 | 0.6188906098246504 |
| 0.7931678079617651 | 0.9616427817264301 | 0.2979977536593329 |
| 0.4668189676847504 | 0.2873346509160147 | 0.6566568597122516 |
| 0.1324160219793689 | 0.6256962225627770 | 0.4688501232550250 |
| 0.3001713423730004 | 0.7310536656705036 | 0.2997510526317858 |
| 0.9785816153934239 | 0.0702289524158562 | 0.6355490989589588 |
| 0.6402736430954632 | 0.4075390288224732 | 0.4693406787791269 |
| 0.5290669064200385 | 0.2095206347214681 | 0.2685224139057941 |
| 0.1794968203360799 | 0.5369418179169335 | 0.6087627003875424 |
| 0.8564273866562767 | 0.8811852505644664 | 0.4422258565523778 |
| 0.8871197388798883 | 0.1302967887259165 | 0.4556069201955149 |
| 0.5475728592976290 | 0.4638591589261656 | 0.2898647493553909 |
| 0.2225783335202452 | 0.7895718019401360 | 0.6197395957714544 |
| 0.5385143169128029 | 0.7316775378289561 | 0.2989405917510351 |
| 0.2065849778420241 | 0.0745973861164502 | 0.6594872037994872 |
| 0.8740091490392418 | 0.4065058613327349 | 0.4688984205691918 |
| 0.7678157356202155 | 0.4692197383846467 | 0.2997827611960676 |
| 0.4328446143105794 | 0.8059727118508184 | 0.6572090101164205 |
| 0.0947240792076923 | 0.1334130012533614 | 0.4631419911705999 |
| 0.2908142031485931 | 0.2196719872698691 | 0.2686676089095886 |
| 0.9565823520273928 | 0.5417959255033202 | 0.6105546661531264 |
| 0.6190648274808841 | 0.8755567658692910 | 0.4402708839621232 |
| 0.3709095783105513 | 0.6577427594795773 | 0.4570764437825318 |
| 0.0364597889782972 | 0.9835645157246019 | 0.2887665225235013 |
| 0.7074153144629977 | 0.3318678910271468 | 0.6216032589499003 |
| 0.7669189531692168 | 0.7069463536434127 | 0.3003093591284290 |
| 0.4243967602156671 | 0.0270858605285447 | 0.6536182558521981 |
| 0.0905928143851318 | 0.3643437701049007 | 0.4682751185419753 |
| 0.0307795923618175 | 0.1987982022776910 | 0.2986516722802778 |
| 0.6874212017622967 | 0.5321520196029501 | 0.6493402067959402 |
| 0.3652137640947333 | 0.8595575318666094 | 0.4660016904131447 |
| 0.2805777494382603 | 0.9703115350970506 | 0.2678466128919507 |
| 0.9552353427192241 | 0.3144435516230783 | 0.6113326737631789 |

|                    |                    |                    |
|--------------------|--------------------|--------------------|
| 0.6241673361891409 | 0.6451453526262402 | 0.4453183151051996 |
| 0.2268182252226592 | 0.3172558274903508 | 0.3777075429764564 |
| 0.8878857230211029 | 0.6458416077189284 | 0.7117588862264681 |
| 0.5566035953590714 | 0.9840192198720010 | 0.5451618417138120 |
| 0.2671470051807860 | 0.9742601929622799 | 0.5314854572732619 |
| 0.9276064225607795 | 0.3063733190901923 | 0.3429909739875419 |
| 0.7575180253130777 | 0.1947803716139194 | 0.5362815869101273 |
| 0.4232432964205992 | 0.5288387371934289 | 0.3665063386801197 |
| 0.0997778641525742 | 0.8644142078578019 | 0.6985110375428950 |
| 0.5414877353637222 | 0.7252220123259826 | 0.5634363872665303 |
| 0.2164959537580748 | 0.0593461432539028 | 0.3863392249498275 |
| 0.8705917418555565 | 0.3890009223429231 | 0.7306973339569058 |
| 0.1830243952903292 | 0.8102319451555204 | 0.3786966331435486 |
| 0.8535039595228490 | 0.1374300533894821 | 0.7107061583707787 |
| 0.5122428100946688 | 0.4711333300634717 | 0.5469664927431821 |
| 0.5253586781083989 | 0.1922117850892190 | 0.5310506220611465 |
| 0.1936884305864232 | 0.5219000033336431 | 0.3490622378354067 |
| 0.8651237892790216 | 0.8696964095846241 | 0.7040437379145779 |
| 0.3028968752722297 | 0.4620639392604493 | 0.5337483705451200 |
| 0.9712937398974689 | 0.7935834543992630 | 0.3646595051082996 |
| 0.6344581764835631 | 0.1358489083731752 | 0.7024830421000712 |
| 0.7816973796672374 | 0.7256753436927069 | 0.5619521228559788 |
| 0.4394697488954759 | 0.0553943400322023 | 0.3880769661470408 |
| 0.1111723410851239 | 0.3803155455168108 | 0.7282456936046109 |
| 0.6886858579895712 | 0.2738017129756767 | 0.3797621486535807 |
| 0.3631711002194251 | 0.6093174314679771 | 0.6997606608141612 |
| 0.0302871412694448 | 0.9421630280255012 | 0.5434563194133631 |
| 0.3069006467154356 | 0.2301476807217287 | 0.5309685698949148 |
| 0.9766134339132232 | 0.5719406379803372 | 0.3487482953022453 |
| 0.6387557581441209 | 0.8974812781418088 | 0.6927509782303446 |
| 0.0357206897785490 | 0.7400388824620472 | 0.5352967455248853 |
| 0.7059402991265433 | 0.0782279258515453 | 0.3643736051229727 |
| 0.3651670600594356 | 0.3965411774972422 | 0.7013592400211367 |
| 0.7775387885296561 | 0.9596233564309670 | 0.5567464008652347 |
| 0.4448431904221710 | 0.2844679360293048 | 0.3876722385585237 |
| 0.1165248460247643 | 0.6258344756680910 | 0.7297764912776685 |
| 0.1402175261558941 | 0.1454657264558151 | 0.3300665317963626 |
| 0.8112263977248795 | 0.4809168867850937 | 0.6772071745636393 |
| 0.5980919614124983 | 0.6237376207534172 | 0.3235714210317422 |
| 0.2569406662591284 | 0.9526783273380213 | 0.6532713931298540 |
| 0.9245552043628885 | 0.2900289169249636 | 0.4956126690223391 |
| 0.4725851000694516 | 0.8130862391369444 | 0.5084689548483152 |
| 0.3540697635139801 | 0.8944823965471747 | 0.3304619835029017 |
| 0.0184847147637197 | 0.2294953973603712 | 0.6750355743998637 |

|                    |                    |                    |
|--------------------|--------------------|--------------------|
| 0.8760889091519506 | 0.8754332720457180 | 0.3216561420217510 |
| 0.5452720236843211 | 0.1998334348848458 | 0.6527587452704008 |
| 0.2071791357915140 | 0.5330592168333891 | 0.4925753439581135 |
| 0.6874101377018699 | 0.5608575696185200 | 0.5150855816021429 |
| 0.6049682012756239 | 0.3596035481878820 | 0.3303897763358616 |
| 0.2642965634666881 | 0.6818113574651927 | 0.6747053408500679 |
| 0.6249064384829521 | 0.9014799845570020 | 0.3199639850295188 |
| 0.2949891058817183 | 0.2396603003821621 | 0.6530768718501737 |
| 0.9642936180513605 | 0.5739130320207072 | 0.4942941180471720 |
| 0.9422893147042567 | 0.0309489336014682 | 0.5115820334119826 |
| 0.9312059299755500 | 0.7895147912793216 | 0.4869930368826383 |
| 0.4734562412449194 | 0.3082866872038816 | 0.5032078456174206 |
| 0.1442610702289258 | 0.6456995937372132 | 0.3472048815618771 |
| 0.8057915687042148 | 0.9785739686749042 | 0.6766334375020601 |
| 0.5878878353458776 | 0.1190633286316193 | 0.3251975238130015 |
| 0.2567514945696136 | 0.4490800475846426 | 0.6610117673895717 |
| 0.7112824118501825 | 0.0424718600013917 | 0.4866659134467003 |
| 0.1906570114856556 | 0.0630816055820605 | 0.5015666380273288 |
| 0.8535116368562071 | 0.3988394023516650 | 0.3469324131615231 |
| 0.5138911144438667 | 0.7350679534623057 | 0.6842403095002418 |
| 0.3813291344827558 | 0.3698035925046060 | 0.3248652545509884 |
| 0.0471444816916918 | 0.7036560921871418 | 0.6647538326472580 |
| 0.4575845773787862 | 0.5709085921983057 | 0.4901082566829370 |
| 0.4350068511006523 | 0.0255241673359537 | 0.5042880410659762 |
| 0.0994148999051564 | 0.3542903230179530 | 0.3463104165819750 |
| 0.7868834434628396 | 0.7047653439868949 | 0.6808431742081048 |
| 0.1303630559288183 | 0.9110873335027043 | 0.3237085966597618 |
| 0.7954418769206099 | 0.2408599723412232 | 0.6677785392122425 |
| 0.7000847468026795 | 0.3016587076677853 | 0.5005047414646564 |
| 0.7004021899595695 | 0.8024643925304334 | 0.5021804660944256 |
| 0.1989170528592356 | 0.2975672538559487 | 0.4978197249566195 |
| 0.2002115899073453 | 0.7994453836481308 | 0.4993500409114612 |
| 0.8700343112160455 | 0.1289123305524363 | 0.3339397675395908 |
| 0.5217150043313200 | 0.4575512667909502 | 0.6667433361056763 |
| 0.3717898571390055 | 0.6416583758515398 | 0.3353164353770408 |
| 0.0321667422187273 | 0.9585983276104162 | 0.6649572811034755 |
| 0.3665809703424250 | 0.1328895561680123 | 0.3121641639227801 |
| 0.0316674114080037 | 0.4640554308795271 | 0.6847445660444091 |
| 0.8564525810852593 | 0.6295123911627232 | 0.3360826639643258 |
| 0.5486552741912765 | 0.9763338892862701 | 0.6667746211476964 |
| 0.5674853779568859 | 0.6981931918471542 | 0.7735720307647316 |
| 0.5753668997522059 | 0.7029334200467113 | 0.8399032815407371 |
| 0.6027359052164155 | 0.6550668603213760 | 0.7202819459076747 |

**The perfect Ir<sub>7</sub>-O<sub>V6</sub>-[CO<sub>2</sub>+H]\* surface**

O In Ir In C O H

1.000000000000000

12.5091307398835667 -7.222149999999965 0.000000000000000

0.000000000000000 14.444299999999984 0.000000000000000

0.000000000000000 0.000000000000000 17.985499999999947

O In Ir In C O H

71 27 1 20 1 2 1

Direct

0.8400325694476951 0.6148066022486329 0.4611744219467852

0.5167124194089175 0.9524274461298414 0.2894999263633424

0.1722160741108684 0.2802651609212622 0.6187242443748425

0.7945299132697123 0.9615467572474335 0.2994209298464240

0.4643670216973468 0.2833402420773341 0.6627665633883346

0.1366860920047339 0.6277386361800754 0.4692949986115926

0.3018942920032560 0.7309782275866260 0.3003581441784101

0.9814089946774830 0.0762302940399739 0.6312890769489253

0.6419767261310140 0.4095937118459030 0.4701880275103735

0.5304804637355213 0.2101410027201570 0.2672091714173077

0.1827826462845716 0.5373601519381018 0.6094299104906510

0.8574667353826544 0.8813262425402150 0.4449532552080437

0.8887251872905865 0.1316044719773955 0.4546482543170028

0.5491139569960048 0.4654126703406957 0.2904774738185021

0.2213521404663030 0.7915780390939223 0.6179609352749549

0.5400434671886574 0.7319103136849475 0.3004267618674939

0.2078479554753263 0.0771008799554888 0.6603122345041046

0.8741240470050692 0.4049621003522308 0.4679113818578559

0.7698903999051609 0.4709859912959478 0.3004869722971426

0.4256523263214923 0.8057634081962365 0.6462470334922914

0.0968022751176048 0.1352477784563723 0.4614776992345638

0.2915519470638341 0.2205207107955394 0.2677215438349630

0.9590622091011871 0.5379380132704145 0.6072227299243682

0.6210925190444309 0.8740579196138735 0.4423514393960951

0.3770224341155843 0.6596435168565435 0.4597542852721972

0.0366792028516004 0.9835895306545209 0.2892255179177020

0.7071306699241877 0.3289019696565814 0.6211453295670021

0.7670205500511309 0.7072487639393964 0.3040233970873700

0.4241823504939336 0.0264931652315171 0.6522511209466855

0.0916315410726901 0.3650160659937457 0.4684758140911914

0.0325899336308320 0.1997333629217661 0.2982901693685478

0.6876354586512530 0.5263357898786439 0.6480361996901934

0.3659672671402390 0.8608218922752227 0.4640045230820771

0.2807954820639822 0.9701222326738730 0.2669137267211835

0.9553440724977618 0.3135396178927086 0.6116082639520051

|                    |                    |                    |
|--------------------|--------------------|--------------------|
| 0.6251148211571094 | 0.6468431498185313 | 0.4506711281517302 |
| 0.2289253584611763 | 0.3189869373587497 | 0.3776381693250130 |
| 0.8941339434275455 | 0.6437317212149878 | 0.7058419903820908 |
| 0.5574146586448987 | 0.9864743805050611 | 0.5429450627021266 |
| 0.2681857227187486 | 0.9757995982797899 | 0.5305531484029049 |
| 0.9292808827934179 | 0.3074008733067446 | 0.3401081895774569 |
| 0.7580639203404201 | 0.1946024136535564 | 0.5358565375046785 |
| 0.4251652421062559 | 0.5291775154688224 | 0.3681482202160756 |
| 0.1003751954988658 | 0.8662368800031072 | 0.6964246575494745 |
| 0.5472425550453455 | 0.7308419552916474 | 0.5701024100530522 |
| 0.2183320400715976 | 0.0602213945337552 | 0.3851328214788879 |
| 0.8697954878405030 | 0.3876668228661797 | 0.7299145108076945 |
| 0.1835483935557715 | 0.8103101786972577 | 0.3773539988518105 |
| 0.8516318263245829 | 0.1353230574537152 | 0.7110830152304275 |
| 0.5112666732474661 | 0.4689622641471049 | 0.5483276334863998 |
| 0.5247408909938369 | 0.1932775635813291 | 0.5309220023959372 |
| 0.1965712274262780 | 0.5229642937500695 | 0.3513336894046749 |
| 0.8738820450166319 | 0.8809463745109783 | 0.7033862347063315 |
| 0.3043706962282186 | 0.4636007391700227 | 0.5348285002183457 |
| 0.9719684315400440 | 0.7943740976801135 | 0.3669920219661545 |
| 0.6336072191818690 | 0.1338231356271534 | 0.7023693429038667 |
| 0.7841370307873408 | 0.7272070003117139 | 0.5708589484043008 |
| 0.4401558154029034 | 0.0565996208206198 | 0.3867482676154742 |
| 0.1100003139967983 | 0.3798294815819575 | 0.7289416348752726 |
| 0.6887515576963873 | 0.2739017952831523 | 0.3791930169094162 |
| 0.3575723202695998 | 0.6149184276439875 | 0.7067022553014024 |
| 0.0335580179183167 | 0.9449387027072970 | 0.5429424656470248 |
| 0.3086318383738860 | 0.2315040584121818 | 0.5307928046539323 |
| 0.9778120515766286 | 0.5724545629523868 | 0.3528019577068624 |
| 0.6317603671190551 | 0.8906297050951169 | 0.6877107062050011 |
| 0.0372427246498079 | 0.7395554400802399 | 0.5338895737168290 |
| 0.7068413710891399 | 0.0781957759666167 | 0.3642352061170872 |
| 0.3659913968550474 | 0.3992125156908001 | 0.7005203649908525 |
| 0.7791460913085192 | 0.9626553917268573 | 0.5572034698935907 |
| 0.4460354209342339 | 0.2846726315557959 | 0.3861705275237013 |
| 0.1134688277376908 | 0.6252994345047330 | 0.7289823126088943 |
| 0.1412846216202374 | 0.1460076698249896 | 0.3297993678282368 |
| 0.8127970799471357 | 0.4803241058743650 | 0.6742539768676197 |
| 0.5995569383450242 | 0.6244109873556075 | 0.3269589293938129 |
| 0.2569455872800662 | 0.9548564047161994 | 0.6527474740219151 |
| 0.9253352832753127 | 0.2901610200238897 | 0.4961495855024551 |
| 0.4742201949093622 | 0.8162055114794218 | 0.5077662388545204 |
| 0.3548086786537430 | 0.8949335181496431 | 0.3297479900767705 |
| 0.0178964240130580 | 0.2291371603696185 | 0.6748549492958218 |

|                    |                    |                    |
|--------------------|--------------------|--------------------|
| 0.8772833731491366 | 0.8755865504392022 | 0.3244466732786538 |
| 0.5452187219920637 | 0.1991015391725518 | 0.6528266216098438 |
| 0.2092705708040577 | 0.5338310620169936 | 0.4926129282308740 |
| 0.6903517822623197 | 0.5617382410273178 | 0.5226799650442542 |
| 0.6063467398210990 | 0.3603255524096809 | 0.3296024940677347 |
| 0.2582760217170106 | 0.6837021399795707 | 0.6731582289756273 |
| 0.6263845481857052 | 0.9014937670836926 | 0.3215415621716886 |
| 0.2954941558626616 | 0.2414161795323210 | 0.6530560126855589 |
| 0.9658914172039639 | 0.5734147682956704 | 0.4923065862608169 |
| 0.9448253023026186 | 0.0337431276523443 | 0.5114959128983141 |
| 0.9305433083972574 | 0.7893558259703366 | 0.4915622944405535 |
| 0.4747909210439769 | 0.3097179013762615 | 0.5011555953881724 |
| 0.1458678741503525 | 0.6460028294834931 | 0.3476997970888695 |
| 0.8049991885922003 | 0.9776538882733865 | 0.6765987714602318 |
| 0.5886968031001841 | 0.1192223511905181 | 0.3245095574277101 |
| 0.2551405740306036 | 0.4481912892401080 | 0.6625158696761774 |
| 0.7129807836745448 | 0.0430135844271362 | 0.4862397988652654 |
| 0.1921366449666571 | 0.0645989167870707 | 0.5000955679557140 |
| 0.8540132131735629 | 0.3984328903527855 | 0.3465544051881658 |
| 0.4989395940169917 | 0.7291100378098387 | 0.6766469648530750 |
| 0.3824948100742616 | 0.3703018883417016 | 0.3241720044159311 |
| 0.0476250568427986 | 0.7049424399113757 | 0.6609640870054083 |
| 0.4588500079912236 | 0.5682878632691288 | 0.4905355636232387 |
| 0.4352150880075302 | 0.0271721682509450 | 0.5028505117922718 |
| 0.1006664676733091 | 0.3548584390166560 | 0.3464479605822423 |
| 0.7914713390055573 | 0.7068785753302718 | 0.6977095170837532 |
| 0.1303448057332970 | 0.9110532889946684 | 0.3235051462911617 |
| 0.7945920297290527 | 0.2395297437229733 | 0.6675623570977236 |
| 0.7003385719606389 | 0.3018434033588707 | 0.5001744765990666 |
| 0.7053074834790921 | 0.8036444380807620 | 0.5076014691170599 |
| 0.2002665482626712 | 0.2985963942041996 | 0.4978460562799257 |
| 0.2012293817090991 | 0.8014767290460291 | 0.4977576495544030 |
| 0.8714635886854977 | 0.1297043406566508 | 0.3331416845934203 |
| 0.5233509831579569 | 0.4527384185915345 | 0.6678421100820651 |
| 0.3742076195622647 | 0.6427917748437842 | 0.3367692327200553 |
| 0.0347033575065893 | 0.9637006579767290 | 0.6644855879608166 |
| 0.3673845696405221 | 0.1331517303758314 | 0.3101490864510139 |
| 0.0303111340976391 | 0.4633249545984709 | 0.6844467214588283 |
| 0.8565666644950723 | 0.6302749982016810 | 0.3395141094670609 |
| 0.5479202084865978 | 0.9760282908322355 | 0.6642309738349915 |
| 0.5535490446031411 | 0.6831786258172494 | 0.7657014349022748 |
| 0.5616988340292676 | 0.6945800460983028 | 0.8314264605652449 |
| 0.5694176410486531 | 0.6338541364708810 | 0.7114389734260939 |
| 0.7363870144061658 | 0.6786275405897130 | 0.7868834028919224 |

**The perfect Ir<sub>7</sub>-O<sub>V6</sub>-[CO+OH]\* surface**

O In Ir In C O H

1.000000000000000  
12.5091307398835667 -7.2221499999999965 0.000000000000000  
0.0000000000000000 14.4442999999999984 0.0000000000000000  
0.0000000000000000 0.0000000000000000 17.9854999999999947

O In Ir In C O H  
71 27 1 20 1 2 1

Direct

0.8414545971458038 0.6127554000518093 0.4576891816202415  
0.5167126616900576 0.9513529535683930 0.2895246812637373  
0.1722706732500434 0.2762658366406911 0.6182810366010021  
0.7929998178985282 0.9599167963057603 0.2991103473438243  
0.4697486571360571 0.2890939171620458 0.6533022396033906  
0.1337152153677257 0.6250581093063993 0.4687537731177378  
0.3015399488569671 0.7295199607165047 0.3003862234677687  
0.9810534973932573 0.0699889519730676 0.6353887414525249  
0.640828833806804 0.4057651654506367 0.4679196898030495  
0.5301987235114500 0.2084199668274637 0.2687895277064956  
0.1777705101079547 0.5333216630041959 0.6070030592359721  
0.8573452518363752 0.8800316479258160 0.4425980859901820  
0.8881132179395096 0.1288600672377267 0.4559146826409539  
0.5485269966667768 0.4632195957159259 0.2907845681309096  
0.2239315644748340 0.7891928813824837 0.6191322153664910  
0.5396204589854805 0.7310404281906825 0.2999653884872329  
0.2089937201394656 0.0743855638927770 0.6627719607269668  
0.8756347846278012 0.4055545906455280 0.4685353062518076  
0.7684547033225607 0.4678046976138455 0.2996876136544518  
0.4362935757644901 0.8082037742075673 0.6500798824212447  
0.0955353661878645 0.1315695137563180 0.4618547020856172  
0.2919739116480442 0.2189945721147961 0.2679494058256848  
0.9583532840999143 0.5415786498429950 0.6105661590264854  
0.6179180664777335 0.8718030557296278 0.4439531736715507  
0.3742486446909985 0.6580158657220838 0.4597416337723868  
0.0367443285746254 0.9819007230131148 0.2878906832852075  
0.7098232551984514 0.3305195059707340 0.6209663016864756  
0.7670560246779160 0.7055250850176678 0.3011624823117624  
0.4261956191493324 0.0279103300238802 0.6542699028787545  
0.0906322091875679 0.3615212112366167 0.4678936912862416  
0.0309823213955521 0.1971608060425949 0.2982250670390396  
0.6906539701169353 0.5290584007995793 0.6448115551650430  
0.3670826866875380 0.8578434676814107 0.4677434912126139  
0.2817307071762982 0.9688636840866290 0.2670363544153347  
0.9568733860638867 0.3135262879606476 0.6118100366225300



|                    |                    |                    |
|--------------------|--------------------|--------------------|
| 0.6241490103563755 | 0.6454781859346969 | 0.4470686515922144 |
| 0.2272878267486887 | 0.3158564201506989 | 0.3768592276080962 |
| 0.8884565481147402 | 0.6450242271685239 | 0.7121882227683045 |
| 0.5591132342711305 | 0.9855789888098844 | 0.5452973521249749 |
| 0.2686519973818240 | 0.9739760402270000 | 0.5316232251666012 |
| 0.9281946880217239 | 0.3048274824570694 | 0.3417470065037632 |
| 0.7593639128930718 | 0.1938459679968086 | 0.5367616077670394 |
| 0.4242862969899173 | 0.5281409232978833 | 0.3676209834386890 |
| 0.1015380476069505 | 0.8633027141773133 | 0.6986062521588811 |
| 0.5426537736373703 | 0.7222505976258152 | 0.5713947814970419 |
| 0.2172468922464816 | 0.0579146667452584 | 0.3848822135271194 |
| 0.8726867401569931 | 0.3889941405804280 | 0.7307825414894723 |
| 0.1848133161134921 | 0.8098780704432333 | 0.3785264432277256 |
| 0.8561196633248098 | 0.1373465682219803 | 0.7116047355482770 |
| 0.5128586754989000 | 0.4698848965885756 | 0.5453271862023709 |
| 0.5271477449623411 | 0.1909783918836436 | 0.5305211344493892 |
| 0.1953114162277919 | 0.5209886658365425 | 0.3517249715463853 |
| 0.8673125927284072 | 0.8688043080414812 | 0.7041885470469272 |
| 0.3026182668366180 | 0.4592570977886747 | 0.5323140132716512 |
| 0.9724424674073249 | 0.7924095268035456 | 0.3640777401561395 |
| 0.6364218690280675 | 0.1368491743330321 | 0.7035539443792586 |
| 0.7839088440483740 | 0.7253330227888101 | 0.5609346413805469 |
| 0.4396057718509804 | 0.0536362906728224 | 0.3879060756586630 |
| 0.1141212913907506 | 0.3800303240196742 | 0.7280757307277010 |
| 0.6901253861261144 | 0.2721505313762906 | 0.3795292394344986 |
| 0.3653913263672933 | 0.6080369878576097 | 0.6881416082599267 |
| 0.0324847133044554 | 0.9416996928484656 | 0.5435207448235305 |
| 0.3072004237792629 | 0.2278138345566107 | 0.5305178295603655 |
| 0.9778716821881425 | 0.5708048566650100 | 0.3476605518561487 |
| 0.6432961965774552 | 0.9010453546672070 | 0.6917279573059233 |
| 0.0368987590885139 | 0.7392544394493875 | 0.5348523251577966 |
| 0.7058628231293966 | 0.0756110767351981 | 0.3661848139717949 |
| 0.3674222867462797 | 0.3963883662277368 | 0.7009115632245690 |
| 0.7796350907334445 | 0.9588609372752763 | 0.5576265368877091 |
| 0.4448888915881473 | 0.2825607397594730 | 0.3876907986306627 |
| 0.1203370368208147 | 0.6256189154237878 | 0.7286322484542332 |
| 0.1407906093683541 | 0.1441054572040436 | 0.3288267617299366 |
| 0.8129022226491859 | 0.4801251140188586 | 0.6763239652543536 |
| 0.5986283145724911 | 0.6228446158612851 | 0.3249962022809600 |
| 0.2587401533600798 | 0.9525175053125982 | 0.6535420764360099 |
| 0.9255534120745396 | 0.2886613735876641 | 0.4962389700143364 |
| 0.4727852811924538 | 0.8111571904341928 | 0.5152206373888715 |
| 0.3551484730466211 | 0.8933223077587362 | 0.3304996238704903 |
| 0.0207178135264264 | 0.2290988064269490 | 0.6752026024427140 |

|                    |                    |                    |
|--------------------|--------------------|--------------------|
| 0.8766745503206458 | 0.8742893014641099 | 0.3221816310737027 |
| 0.5474963204094621 | 0.2005785637183500 | 0.6523129554608927 |
| 0.2075110764236340 | 0.5308157141411446 | 0.4911638795649453 |
| 0.6888995008899380 | 0.5591444428298626 | 0.5143514963123430 |
| 0.6057738446575734 | 0.3583929128542119 | 0.3311760572416876 |
| 0.2662871086498040 | 0.6803645222277280 | 0.6700785121153205 |
| 0.6251291708810349 | 0.8997750352609528 | 0.3230378279276543 |
| 0.2972678216600581 | 0.2390179492867352 | 0.6528161922848219 |
| 0.9656148383400501 | 0.5730257593310615 | 0.4943264631679980 |
| 0.9438031539602579 | 0.0296446386833568 | 0.5113467256005451 |
| 0.9328649699721441 | 0.7889331469295362 | 0.4865452288826761 |
| 0.4742115208513913 | 0.3063116195081854 | 0.5033650298344945 |
| 0.1452910687661650 | 0.6449443236298287 | 0.3473486182885158 |
| 0.8102119311066005 | 0.9792244759394547 | 0.6771253897746854 |
| 0.5885417202926683 | 0.1174914470093159 | 0.3256898674763425 |
| 0.2576175975458636 | 0.4466348299696439 | 0.6587064689642332 |
| 0.7125376236114837 | 0.0409576211881148 | 0.4877934388758804 |
| 0.1918525132647138 | 0.0615512296988131 | 0.4999426581571890 |
| 0.8546345120056896 | 0.3977042823674496 | 0.3465307992109634 |
| 0.5184160322591129 | 0.7386025659831755 | 0.6878882905229347 |
| 0.3821807006823729 | 0.3687991456447897 | 0.3252301176540821 |
| 0.0486124867200836 | 0.7027462514045086 | 0.6651878239201691 |
| 0.4584272931883568 | 0.5703583596021842 | 0.4918985425008335 |
| 0.4362499514485479 | 0.0242864935201615 | 0.5040077678277816 |
| 0.0997128072062931 | 0.3526841807762293 | 0.3461542239048558 |
| 0.7877194671473227 | 0.7034938678739526 | 0.6786422190462694 |
| 0.1311655203248624 | 0.9096525344873866 | 0.3224757431877107 |
| 0.7974292996258423 | 0.2404879309881783 | 0.6682083347185219 |
| 0.7015085898939400 | 0.3002963475944220 | 0.5000855542846181 |
| 0.7008961389763322 | 0.8011193287830591 | 0.5047629302311486 |
| 0.1993720026471334 | 0.2951377228567390 | 0.4969968306419518 |
| 0.2016472370923978 | 0.7990022099886892 | 0.4991492420053240 |
| 0.8703926272636285 | 0.1273098060336251 | 0.3344420208777546 |
| 0.5243908910968539 | 0.4604366042062679 | 0.6642590382012042 |
| 0.3738365984340707 | 0.6416970233461706 | 0.3374760602000630 |
| 0.0347073931272696 | 0.9582658835130503 | 0.6652082133761014 |
| 0.3673715945994743 | 0.1317432210102910 | 0.3114333173076506 |
| 0.0336954417792434 | 0.4634227306048080 | 0.6848424535378325 |
| 0.8573625275919928 | 0.6282114398356782 | 0.3357175978005353 |
| 0.5507014804024392 | 0.9784926042494341 | 0.6661800494883398 |
| 0.5030429303564454 | 0.7528773962126585 | 0.7875036037623593 |
| 0.4959101937153410 | 0.7615890460496124 | 0.8513134385911793 |
| 0.6060530938710637 | 0.6515218940492010 | 0.7114845332495996 |
| 0.6012713070120717 | 0.6436299442563139 | 0.7652145850988173 |

**The perfect Ir<sub>7</sub>-O<sub>V6</sub>-[TS-CO-O]\* surface**

| O                   | In | Ir | In | C                   | O                   |
|---------------------|----|----|----|---------------------|---------------------|
| 1.000000000000000   |    |    |    |                     |                     |
| 12.5091307398836005 |    |    |    | -7.2221500000000001 | 0.0000000000000000  |
| 0.0000000000000000  |    |    |    | 14.4443000000000001 | 0.0000000000000000  |
| 0.0000000000000000  |    |    |    | 0.0000000000000000  | 17.9855000000000018 |

| O  | In | Ir | In | C | O |
|----|----|----|----|---|---|
| 71 | 27 | 1  | 20 | 1 | 2 |

**Direct**

|                    |                    |                    |
|--------------------|--------------------|--------------------|
| 0.8401309569240076 | 0.6139163090204961 | 0.4589439792555868 |
| 0.5153634283313705 | 0.9529272011956513 | 0.2890852151133019 |
| 0.1705827598221397 | 0.2777010865778162 | 0.6184201323359811 |
| 0.7929895420796234 | 0.9613839131484841 | 0.2981021070745546 |
| 0.4694561016726891 | 0.2916659902814479 | 0.6527410530628835 |
| 0.1314913231698015 | 0.6252771786083489 | 0.4685911216413437 |
| 0.2996554376329763 | 0.7309986410392139 | 0.2993922737972535 |
| 0.9789665032866981 | 0.0705026911459407 | 0.6354878142385199 |
| 0.6402613394143226 | 0.4079689683738077 | 0.4708571249442968 |
| 0.5288367651772272 | 0.2100149145181382 | 0.2695732686162982 |
| 0.1789474138890805 | 0.5365402231441797 | 0.6082331262851363 |
| 0.8557436407764331 | 0.8807917695144998 | 0.4425360429506855 |
| 0.8869966444492581 | 0.1302315513698400 | 0.4554124414144008 |
| 0.5472792107435109 | 0.4636354290429043 | 0.2904850684906216 |
| 0.2234465103574142 | 0.7899660423873934 | 0.6191972939559302 |
| 0.5382788213853978 | 0.7316940210232132 | 0.2987237895600426 |
| 0.2069186765122959 | 0.0751105308958993 | 0.6586756366149874 |
| 0.8743910877848365 | 0.4070675002057278 | 0.4690504322123423 |
| 0.7669449259278213 | 0.4692651138287871 | 0.3008512241839841 |
| 0.4363983314252964 | 0.8055898826116077 | 0.6547454420970514 |
| 0.0941438157304813 | 0.1329996594495584 | 0.4630527947992949 |
| 0.2911491080647398 | 0.2196350155058952 | 0.2696191529005522 |
| 0.9568950559193588 | 0.5424980041164860 | 0.6113288444416570 |
| 0.6188808551468060 | 0.8766034205341677 | 0.4399847277459158 |
| 0.3686016709693494 | 0.6575196680216033 | 0.4560719624772552 |
| 0.0361636469682604 | 0.9832834925690526 | 0.2890077754617039 |
| 0.7085773478974053 | 0.3312695548601794 | 0.6222847362450741 |
| 0.7668630412237168 | 0.7068552772383324 | 0.3001228244724846 |
| 0.4244530106379830 | 0.0276730792227718 | 0.6538171359294629 |
| 0.0898585405807684 | 0.3640863697165607 | 0.4677765276588227 |
| 0.0303875249587053 | 0.1984073530148048 | 0.2984972184237230 |
| 0.6876859647438970 | 0.5301486819198705 | 0.6478237005670611 |
| 0.3650633793197803 | 0.8598901771851781 | 0.4658518082021309 |
| 0.2804652758341002 | 0.9704370191680290 | 0.2685212552177911 |
| 0.9551613492510486 | 0.3149406197397662 | 0.6115371976380660 |

|                    |                    |                    |
|--------------------|--------------------|--------------------|
| 0.6246222887441873 | 0.6449046300956136 | 0.4447298192120518 |
| 0.2260873637558745 | 0.3171051463544332 | 0.3774280334439669 |
| 0.8869051930609425 | 0.6475038778910623 | 0.7112045939284849 |
| 0.5567354508534261 | 0.9848267470707596 | 0.5449142122984735 |
| 0.2671619661069085 | 0.9744388400073406 | 0.5313288050019457 |
| 0.9271701032096684 | 0.3064285862582121 | 0.3420861325485746 |
| 0.7578061517040080 | 0.1948534148571012 | 0.5358873999900965 |
| 0.4229172427222390 | 0.5291992787661128 | 0.3663172890614160 |
| 0.1009142199347397 | 0.8650938925129283 | 0.6989326721026075 |
| 0.5394079830920520 | 0.7247734854178304 | 0.5597665209911921 |
| 0.2159959247521841 | 0.0590362229718236 | 0.3868543011611962 |
| 0.8713643052833175 | 0.3903339205520561 | 0.7311455598666984 |
| 0.1826110622544196 | 0.8098529134650789 | 0.3787573894782607 |
| 0.8537784990783565 | 0.1378361476349196 | 0.7107531390282231 |
| 0.5119409869817527 | 0.4738197158530723 | 0.5478662102188439 |
| 0.5258843394807153 | 0.1922550987692477 | 0.5312080251295747 |
| 0.1927791040728764 | 0.5215119363763948 | 0.3479587237562990 |
| 0.8657163953052719 | 0.8699032086480585 | 0.7042404736446254 |
| 0.3021873955312607 | 0.4614776880791627 | 0.5325298848513130 |
| 0.9709441030046235 | 0.7935413568050572 | 0.3653404118567685 |
| 0.6340124640682810 | 0.1346745519664738 | 0.7019155066039142 |
| 0.7804913481627578 | 0.7261283170084680 | 0.5626085664582038 |
| 0.4394858183670522 | 0.0554190170971020 | 0.3883317795818416 |
| 0.1115893603940129 | 0.3806780090805745 | 0.7280153649093022 |
| 0.6886956753636854 | 0.2740511009877863 | 0.3804111495745269 |
| 0.3664405562987606 | 0.6081702783588442 | 0.6924538040785838 |
| 0.0299558091235366 | 0.9420158243040594 | 0.5436533931660988 |
| 0.3063774016222950 | 0.2303224486352784 | 0.5307074555082254 |
| 0.9763103760818297 | 0.5719682709700347 | 0.3475237853414196 |
| 0.6402995222447723 | 0.8958518936408281 | 0.6924030879864107 |
| 0.0357442195307422 | 0.7404434233878489 | 0.5356388626084104 |
| 0.7061279885460959 | 0.0787780544857631 | 0.3637823534305142 |
| 0.3639860456824309 | 0.3954847990998839 | 0.7022652437334618 |
| 0.7772847974271097 | 0.9596994662826418 | 0.5568144251177357 |
| 0.4449515626597779 | 0.2851644280255801 | 0.3897998975902883 |
| 0.1198689573998071 | 0.6274700474425418 | 0.7289435317044008 |
| 0.1399200737693147 | 0.1452150802856922 | 0.3303510329812216 |
| 0.8111832069807384 | 0.4820119922717117 | 0.6775826281980680 |
| 0.5979298952922010 | 0.6236900809815145 | 0.3237557180465188 |
| 0.2573085419673526 | 0.9528567687314153 | 0.6530502705577310 |
| 0.9243193264606162 | 0.2899427203174918 | 0.4959240056519396 |
| 0.4714243331513925 | 0.8128716340956983 | 0.5092300751573801 |
| 0.3539153101735519 | 0.8943323025841614 | 0.3308129361560084 |
| 0.0185797264215949 | 0.2298534295362637 | 0.6748902922522293 |

|                    |                    |                    |
|--------------------|--------------------|--------------------|
| 0.8758040712406919 | 0.8751388690919418 | 0.3221889772078825 |
| 0.5454114834847616 | 0.2005249596149276 | 0.6527535189121045 |
| 0.2065856190132121 | 0.5327109992652390 | 0.4921411552518556 |
| 0.6871013709283956 | 0.5612767551076685 | 0.5164096893204315 |
| 0.6044155994588580 | 0.3596668334936213 | 0.3321674089695837 |
| 0.2678438254833824 | 0.6829003753987234 | 0.6726557725325141 |
| 0.6246613159460639 | 0.9014922514514294 | 0.3201047450400151 |
| 0.2963952751378820 | 0.2405068825088248 | 0.6527173983885654 |
| 0.9640985281127384 | 0.5741959341864835 | 0.4952139870720524 |
| 0.9417176311542940 | 0.0305548106159829 | 0.5116183663616434 |
| 0.9300068368276195 | 0.7890437663385080 | 0.4880183142441752 |
| 0.4741651992847957 | 0.3098985802664605 | 0.5062372845399916 |
| 0.1437418157203716 | 0.6454342114240943 | 0.3470233070158900 |
| 0.8071723814474375 | 0.9789443234805237 | 0.6768509964561199 |
| 0.5878325015786897 | 0.1193056308715472 | 0.3254729556365946 |
| 0.2562498152774292 | 0.4478846547491573 | 0.6597857865957223 |
| 0.7110553028489502 | 0.0424152090782248 | 0.4865262392048545 |
| 0.1904415184543654 | 0.0632077731481725 | 0.5021377724631222 |
| 0.8533454212569189 | 0.3990693623717353 | 0.3471473468038035 |
| 0.5193456962219958 | 0.7332407908157677 | 0.6844734149251132 |
| 0.3814057623430106 | 0.3696769479019782 | 0.3260559388094817 |
| 0.0473339447379452 | 0.7040709218351061 | 0.6655396439746964 |
| 0.4574312006277579 | 0.5723876805883898 | 0.4899728345682624 |
| 0.4351614890038437 | 0.0258869450084595 | 0.5045386563237503 |
| 0.0986949596148333 | 0.3540614605628927 | 0.3458915965979656 |
| 0.7808959754608867 | 0.7033317925088293 | 0.6825532939388059 |
| 0.1300478358887389 | 0.9109024385494305 | 0.3241862011185105 |
| 0.7955826426215779 | 0.2415514594652089 | 0.6683821695499900 |
| 0.7001884940226768 | 0.3018197068180120 | 0.5010505270034673 |
| 0.6988307361134348 | 0.8019537511010758 | 0.5022556542242714 |
| 0.1984599588115333 | 0.2972397609359552 | 0.4974446085685805 |
| 0.1999709162737917 | 0.7994516197295092 | 0.4992963663382911 |
| 0.8698036010765681 | 0.1288229608117015 | 0.3338420698757842 |
| 0.5224353636160212 | 0.4655762150414783 | 0.6684171185874590 |
| 0.3712311877370081 | 0.6416185521224544 | 0.3350680097105169 |
| 0.0318512200679314 | 0.9579433713221097 | 0.6650765385818590 |
| 0.3665203933955924 | 0.1329472259145616 | 0.3135385862074363 |
| 0.0325844729164637 | 0.4651548526138667 | 0.6848803758189319 |
| 0.8562527891399323 | 0.6295903848970956 | 0.3367063730556282 |
| 0.5484175473549906 | 0.9748369216615015 | 0.6664562838227202 |
| 0.5590940395497022 | 0.7008207952317189 | 0.7778922155215664 |
| 0.5705773367898551 | 0.6993799038323028 | 0.8429567920368817 |
| 0.6027506895113972 | 0.6498734411151772 | 0.7188337285685847 |

### The perfect Ir<sub>7</sub>-CO\*<sub>2</sub>-P surface

O In Ir In C O

1.0000000000000000  
12.5091307398835667 -7.2221499999999965 0.0000000000000000  
0.0000000000000000 14.4442999999999984 0.0000000000000000  
0.0000000000000000 0.0000000000000000 17.9854999999999947

O In Ir In C O  
71 27 1 20 1 2

Direct

0.8412139758652558 0.6125579636204639 0.4576483029084137  
0.5156061915124217 0.9519356135550034 0.2903188618320549  
0.1705729638667598 0.2768843218997243 0.6182262790920615  
0.7924797276288581 0.9605372370322215 0.2988336999261195  
0.4722624305625506 0.2947632721658615 0.6477514623010289  
0.1313046232802760 0.6246222471861307 0.4686068642830669  
0.3005890572968790 0.7304611978043184 0.3006447585935917  
0.9802958140622449 0.0709568444280560 0.6353300101377826  
0.6405147400809816 0.4061042339350614 0.4686082498199226  
0.5289925981235887 0.2096060455950612 0.2718384766764587  
0.1766405184353586 0.5344785691970003 0.6075192931518479  
0.8568224542105298 0.8812156851206756 0.4420815854514794  
0.8877046990488234 0.1297305847026803 0.4556919675974229  
0.5478042565088956 0.4633398531693587 0.2932410064388773  
0.2225938604995670 0.7896054097308751 0.6195948215575849  
0.5388229924967327 0.7318354212434279 0.2998589042571550  
0.2080627799382195 0.0757475082470302 0.6585610836636567  
0.8759451709218574 0.4070995503078749 0.4686403552327814  
0.7664777565184252 0.4680360121328839 0.3013716497376441  
0.4369443641879066 0.8076708098815367 0.6523115684647003  
0.0943168785077892 0.1323188921340707 0.4623262365134956  
0.2916592540233794 0.2193817245815876 0.2705107447486359  
0.9578970627541319 0.5430456881665751 0.6119434203133407  
0.6174849862203596 0.8731975641346346 0.4433588574110359  
0.3718069341077370 0.6586748001209302 0.4591021594060136  
0.0362912356538994 0.9827039271864174 0.2887411017695575  
0.7107532711131520 0.3289998691781850 0.6214393226043708  
0.7667038659088116 0.7061927773773740 0.3004883343881138  
0.4251644404602767 0.0285802930533317 0.6524440622067516  
0.0890309224664083 0.3624618542451460 0.4677966318543963  
0.0302013897904566 0.1974890911783870 0.2986457301637256  
0.6906346603079785 0.5244209107617921 0.6396852560968479  
0.3657889628079072 0.8581614842657340 0.4689450736137508  
0.2811308054806663 0.9701076978105541 0.2690432005500124

|                    |                    |                    |
|--------------------|--------------------|--------------------|
| 0.9553044468742249 | 0.3148809277507092 | 0.6122068020261914 |
| 0.6241412413542269 | 0.6460287261100921 | 0.4459836477972729 |
| 0.2257875577206254 | 0.3168180294967630 | 0.3772832075481301 |
| 0.8847932792161805 | 0.6482710457121633 | 0.7105765854144569 |
| 0.5587121858858005 | 0.9853707842453689 | 0.5460724297247487 |
| 0.2671062099830314 | 0.9738429310603653 | 0.5314128320420710 |
| 0.9273243210601857 | 0.3056683844580708 | 0.3405310256605714 |
| 0.7588256490420907 | 0.1937918260225688 | 0.5358503819605344 |
| 0.4229006269249049 | 0.5293504122405350 | 0.3671936370599649 |
| 0.1021111529453282 | 0.8657221001283221 | 0.6997499776277013 |
| 0.5413171018303536 | 0.7234567180520947 | 0.5673554722538694 |
| 0.2156203964609978 | 0.0578786302439503 | 0.3870497538354091 |
| 0.8715669779951222 | 0.3913601840242397 | 0.7313919340414105 |
| 0.1837091923426689 | 0.8097694122055870 | 0.3792544590042813 |
| 0.8547109438466155 | 0.1380573924778981 | 0.7112927038010088 |
| 0.5115891711956188 | 0.4727126064772353 | 0.5447734776653743 |
| 0.5274989999886739 | 0.1912242654633170 | 0.5304881795753938 |
| 0.1938062032872043 | 0.5214309369753164 | 0.3507601575485054 |
| 0.8664552637535905 | 0.8691715576393991 | 0.7031662192535233 |
| 0.3010533020632618 | 0.4600200786906191 | 0.5314646491744716 |
| 0.9713755859480309 | 0.7926651310526821 | 0.3644524745116580 |
| 0.6339679861741178 | 0.1355012012691452 | 0.7033223749273518 |
| 0.7839813528189928 | 0.7267686046674201 | 0.5599632335250396 |
| 0.4391087225306743 | 0.0534313967915719 | 0.3897180754556401 |
| 0.1120870510919051 | 0.3805417512695289 | 0.7283201252637074 |
| 0.6905977477398698 | 0.2725768083410978 | 0.3804668142406982 |
| 0.3667934710256193 | 0.6070155315205189 | 0.6835718661531156 |
| 0.0308773741603475 | 0.9418974153386201 | 0.5435707088641909 |
| 0.3056915659490830 | 0.2294483909571226 | 0.5302441411680520 |
| 0.9773533981626435 | 0.5713412790717479 | 0.3439152815136834 |
| 0.6436055993167858 | 0.8987918392283247 | 0.6915517999879225 |
| 0.0359190131856089 | 0.7402343583017387 | 0.5353570426818274 |
| 0.7055814628438352 | 0.0763449961438374 | 0.3656473706961887 |
| 0.3655122117378234 | 0.3958291009342113 | 0.7008268371828569 |
| 0.7790679640325566 | 0.9593896623830044 | 0.5572447415619542 |
| 0.4437608764406442 | 0.2835664701715564 | 0.3915581719515920 |
| 0.1211095500900358 | 0.6276683628816903 | 0.7290124427308370 |
| 0.1399131394888554 | 0.1445670727440007 | 0.3305758250446631 |
| 0.8109535044197362 | 0.4822647162276202 | 0.6762239684127311 |
| 0.5980692889208117 | 0.6236118948056751 | 0.3252060201481086 |
| 0.2577716391689452 | 0.9531119461406945 | 0.6530438129772167 |
| 0.9245092228942946 | 0.2891274050480837 | 0.4968113337463592 |
| 0.4718157000557993 | 0.8118087990531800 | 0.5154964619757644 |
| 0.3542768346000192 | 0.8939488649288072 | 0.3318936443216685 |

|                    |                    |                    |
|--------------------|--------------------|--------------------|
| 0.0191820099421845 | 0.2298312854548792 | 0.6749499085652604 |
| 0.8759902557859829 | 0.8747028053548477 | 0.3223145644208094 |
| 0.5467379958550653 | 0.2020669750743574 | 0.6520561731646566 |
| 0.2063160131026494 | 0.5315602425604168 | 0.4918025980708963 |
| 0.6883929975036428 | 0.5597090060199583 | 0.5155404328833584 |
| 0.6047121125918403 | 0.3590918434147454 | 0.3356092241981696 |
| 0.2678384186554859 | 0.6820238901289475 | 0.6702956528773910 |
| 0.6245510677878698 | 0.9005643273792115 | 0.3230773218225939 |
| 0.2991003218945410 | 0.2416165964869150 | 0.6522622257685564 |
| 0.9644105338400818 | 0.5738250237448584 | 0.4962687562169712 |
| 0.9426208528935618 | 0.0299775842634115 | 0.5114768452833213 |
| 0.9306904744007820 | 0.7887299317098366 | 0.4874229372907760 |
| 0.4748354991900232 | 0.3091292954312458 | 0.5083326326675135 |
| 0.1440477479080058 | 0.6451845592516591 | 0.3473485270414866 |
| 0.8097646790562314 | 0.9792113875232220 | 0.6774362764074121 |
| 0.5876433394887987 | 0.1180804735283523 | 0.3269740667725919 |
| 0.2557172045621007 | 0.4459210856949138 | 0.6590408242747304 |
| 0.7117998923675417 | 0.0409203293711277 | 0.4878493633188717 |
| 0.1909000268140816 | 0.0629462175464595 | 0.5024310908899492 |
| 0.8543215589615990 | 0.3989240855874576 | 0.3467573363232352 |
| 0.5213379314443082 | 0.7337624413003400 | 0.6859012564116997 |
| 0.3817351339991556 | 0.3691468993938558 | 0.3277806970029633 |
| 0.0462771669018847 | 0.7039911434390194 | 0.6672200968237280 |
| 0.4576614410998453 | 0.5719777105488255 | 0.4914572110306650 |
| 0.4354551913318326 | 0.0244652510454859 | 0.5062412480221503 |
| 0.0984688839208099 | 0.3533322492501972 | 0.3462582470318316 |
| 0.7746648098684730 | 0.7005864927266732 | 0.6801157607387320 |
| 0.1303803341743440 | 0.9103818302174257 | 0.3241362054302368 |
| 0.7961008542555789 | 0.2417687989134799 | 0.6692543658399625 |
| 0.7010698849682897 | 0.3005591339668001 | 0.5007192341024881 |
| 0.7000811575208546 | 0.8010724154150353 | 0.5044904628387342 |
| 0.1982091143916732 | 0.2960250022982091 | 0.4973681745684384 |
| 0.2001730247472231 | 0.7990464320805712 | 0.4999087947635775 |
| 0.8697622210922513 | 0.1279736768633261 | 0.3345642792367309 |
| 0.5258838908507414 | 0.4771802625493473 | 0.6655889050136790 |
| 0.3726205240362260 | 0.6424594702080312 | 0.3374497639540998 |
| 0.0319082842480613 | 0.9570892859097123 | 0.6650237417228294 |
| 0.3666879913246577 | 0.1325602174871972 | 0.3150973684046143 |
| 0.0328114779731049 | 0.4652024311833842 | 0.6853911025377845 |
| 0.8567874443670122 | 0.6286991534747643 | 0.3359751981968579 |
| 0.5499760090922829 | 0.9762591817645505 | 0.6672314178981029 |
| 0.5116949092818113 | 0.7409331004188574 | 0.7866593576933865 |
| 0.5082328623774126 | 0.7452442494566969 | 0.8511500826563012 |
| 0.6046959369905603 | 0.6465534254150433 | 0.6966930847968884 |



### The perfect Ir<sub>7</sub>-H<sub>2</sub>\*\_P surface

O In Ir In H

1.000000000000000  
12.5091307398835667 -7.2221499999999965 0.000000000000000  
0.0000000000000000 14.4442999999999984 0.000000000000000  
0.0000000000000000 0.0000000000000000 17.9854999999999947

O In Ir In H  
72 27 1 20 2

Direct

0.8411828274701004 0.6133592538029149 0.4567670314817712  
0.5157449647939158 0.9527146761269804 0.2892160093702201  
0.1709708050401216 0.2793907610155547 0.6196804188093419  
0.7936035779187300 0.9618291035147132 0.2973807647967727  
0.4708960237465235 0.2944868795703893 0.6512441618736022  
0.1345583184695195 0.6260483696094078 0.4705102718537219  
0.3005137484281383 0.7315415282608452 0.2997756787132284  
0.9775220426388199 0.0703305779180850 0.6351934072089404  
0.6402707652532340 0.4058185694009705 0.4668894915852981  
0.5298852363721180 0.2105608238753761 0.2697635216472081  
0.1878540236292569 0.5401069330278307 0.6119035123978394  
0.8595681007309620 0.8847976392631430 0.4404050264729036  
0.8879647644364660 0.1305757903343335 0.4557753060919577  
0.5487306692612589 0.4636790911982305 0.2906083985584088  
0.2203230205341866 0.7912056365770658 0.6201697081189089  
0.5391987600238374 0.7322605877767885 0.2970534679695744  
0.2064250841592278 0.0766491116034932 0.6590240564048123  
0.8749366554704647 0.4068782341386867 0.4695777780474466  
0.7686297237961129 0.4687808344910467 0.3000769548655766  
0.4313806688794304 0.7994412183553814 0.6376924831395049  
0.0948963389220300 0.1344623097034624 0.4631464419275573  
0.2908316930946683 0.2193804615674065 0.2688170693701486  
0.9588680699752770 0.5428887438115458 0.6111353565157748  
0.6181330928734207 0.8737714780804866 0.4405235007807053  
0.3752653127029315 0.6585716973907582 0.4568608303887301  
0.0377036853264949 0.9842473923058428 0.2877786913752463  
0.7085226972696280 0.3278046768855950 0.6216263221807865  
0.7679734116783552 0.7073963965870463 0.2987869925614811  
0.4226596946863352 0.0263462876669177 0.6534407274160569  
0.0919220862453285 0.3659638080954986 0.4696316551950079  
0.0321100583781456 0.1996865968835659 0.2990550820947063  
0.6903676916171645 0.5245899154485659 0.6375744638097141  
0.3639971404879006 0.8598388028254914 0.4645790449759827  
0.2812704073029133 0.9708131169906187 0.2682675051362896

|                    |                    |                    |
|--------------------|--------------------|--------------------|
| 0.9559359966410712 | 0.3155500167714171 | 0.6126164303205147 |
| 0.6235591303922347 | 0.6459759451198999 | 0.4429699961645298 |
| 0.2280942283291478 | 0.3183298850921449 | 0.3785770498172192 |
| 0.8823508673966489 | 0.6477596539458302 | 0.7085522518103022 |
| 0.5571731510479572 | 0.9861548494124832 | 0.5429073515208884 |
| 0.2669336861765776 | 0.9749999695501407 | 0.5312008694590307 |
| 0.9291568142302914 | 0.3068533548829966 | 0.3434886722105026 |
| 0.5988861622543004 | 0.6439905409129422 | 0.6935831981100344 |
| 0.7592435622584817 | 0.1946645016082583 | 0.5357648923046997 |
| 0.4226744900623655 | 0.5289361854279016 | 0.3628858334037318 |
| 0.0993110746786383 | 0.8659107002651205 | 0.6997099051753997 |
| 0.5465163718042950 | 0.7271693311744197 | 0.5635915341863866 |
| 0.2162296572259101 | 0.0592684574425479 | 0.3867311892211015 |
| 0.8698501897849955 | 0.3900702187732552 | 0.7306004255842460 |
| 0.1822408261515044 | 0.8096196652199460 | 0.3787084810990287 |
| 0.8507146337209047 | 0.1348083322616062 | 0.7102296196347991 |
| 0.5116402234212704 | 0.4717169041124722 | 0.5423664775588365 |
| 0.5257999743948095 | 0.1918742486783715 | 0.5309688876645172 |
| 0.1954536867011815 | 0.5229679116240114 | 0.3502018230460636 |
| 0.8620504015237342 | 0.8677165923622783 | 0.7021544219942945 |
| 0.3048321595642079 | 0.4635273911950532 | 0.5340515025912668 |
| 0.9714019889427761 | 0.7936724345319481 | 0.3636013704879015 |
| 0.6315769931639712 | 0.1307079704132349 | 0.7006135526667132 |
| 0.7833170997675878 | 0.7273545555745686 | 0.5576285610445729 |
| 0.4399788997057247 | 0.0558429891240875 | 0.3878093679314983 |
| 0.1104585482352771 | 0.3806075258575422 | 0.7298181938892943 |
| 0.6904973070471480 | 0.2727774947357741 | 0.3799644590179250 |
| 0.3754580203154954 | 0.6179082168022155 | 0.7063589526153533 |
| 0.0304493806111550 | 0.9424654839057571 | 0.5435664420011764 |
| 0.3063151159843264 | 0.2307523590176870 | 0.5306693363205895 |
| 0.9779124045854668 | 0.5718683977557174 | 0.3493709331524933 |
| 0.6285942584742025 | 0.8805166807359924 | 0.6934334429035759 |
| 0.0353635477826406 | 0.7400204531664188 | 0.5345765165086691 |
| 0.7065271706008843 | 0.0775004768702590 | 0.3641373100245276 |
| 0.3657365215766618 | 0.3989366705771347 | 0.7003628582727297 |
| 0.7756858658186665 | 0.9586266682416149 | 0.5569468265674169 |
| 0.4442960467743286 | 0.2841951698376557 | 0.3890290383996232 |
| 0.1178506115255805 | 0.6278365525642595 | 0.7296563732167802 |
| 0.1406345288687982 | 0.1456858681492130 | 0.3308114049124814 |
| 0.8103849098001393 | 0.4817480400443356 | 0.6749777474815790 |
| 0.5992349924262983 | 0.6244208131770596 | 0.3210198384860456 |
| 0.2554244832828286 | 0.9542856365573962 | 0.6532954868103370 |
| 0.9255247457263649 | 0.2904539321761585 | 0.4966697082013460 |
| 0.4709504624690196 | 0.8139953691825617 | 0.5088800118869812 |

|                    |                    |                    |
|--------------------|--------------------|--------------------|
| 0.3541892185783122 | 0.8948390643732329 | 0.3311145107759328 |
| 0.0174882965890476 | 0.2288326552004098 | 0.6753111051524153 |
| 0.8774273455049727 | 0.8761793071863633 | 0.3201979937556819 |
| 0.5446432249087253 | 0.2004377657029435 | 0.6528220055586079 |
| 0.2097870630191926 | 0.5343132297038165 | 0.4939933184095122 |
| 0.6888100873800923 | 0.5597705946829885 | 0.5137127816499180 |
| 0.6059831744007009 | 0.3597995965285984 | 0.3333826032453948 |
| 0.2667246897070342 | 0.6872893289910591 | 0.6742437934568370 |
| 0.6254635035648397 | 0.9017227249600737 | 0.3199515652466723 |
| 0.2984856594477371 | 0.2425322301437935 | 0.6526962229611848 |
| 0.9649771000966114 | 0.5741817029312691 | 0.4946632070859510 |
| 0.9428964569532803 | 0.0319882582862307 | 0.5123065860743847 |
| 0.9316570555656881 | 0.7899427592638424 | 0.4864401785117560 |
| 0.4741620191151700 | 0.3087017142960426 | 0.5055268048404696 |
| 0.1451563401479769 | 0.6458294480129340 | 0.3483859282580198 |
| 0.8028089737385904 | 0.9751797651439672 | 0.6768965246778396 |
| 0.5884736274172354 | 0.1191131954204473 | 0.3251757279174550 |
| 0.2564469868616095 | 0.4484918534560965 | 0.6640048367170593 |
| 0.7116979249091392 | 0.0425649389352988 | 0.4862947857297142 |
| 0.1903011110239810 | 0.0639380572533469 | 0.5021787312742394 |
| 0.8545645020226942 | 0.3988965521002209 | 0.3476052644625704 |
| 0.5142621743590667 | 0.7245542882576343 | 0.6697901080064882 |
| 0.3819712984957597 | 0.3688762446261721 | 0.3247946410975668 |
| 0.0437491109917586 | 0.7045695552891040 | 0.6661013435717834 |
| 0.4568704456485136 | 0.5664845127076862 | 0.4844197145461293 |
| 0.4342541257235465 | 0.0261495828580453 | 0.5037885194243454 |
| 0.1007304113093798 | 0.3550160368783787 | 0.3475040769456567 |
| 0.7713594838645567 | 0.6997195746263978 | 0.6778764270856493 |
| 0.1308292427769318 | 0.9114383116388163 | 0.3235976032234291 |
| 0.7938578230279011 | 0.2400951408535901 | 0.6681810600684265 |
| 0.7002309385206847 | 0.3004019590354752 | 0.5006296333028998 |
| 0.7045326868890326 | 0.8037043378744646 | 0.4987288444842183 |
| 0.1993922000181005 | 0.2981076698240740 | 0.4988853997286548 |
| 0.1997692962857517 | 0.8005066475333007 | 0.4997155612438838 |
| 0.8711976235085837 | 0.1292144116230727 | 0.3343032847743961 |
| 0.5257314158660413 | 0.4748629760657266 | 0.6635877413972854 |
| 0.3727416964513491 | 0.6430150130453588 | 0.3341691216792780 |
| 0.0291710283476917 | 0.9571249646735909 | 0.6652757752875386 |
| 0.3672142801253721 | 0.1334011066976851 | 0.3131631929954364 |
| 0.0316165119640304 | 0.4651553720794083 | 0.6863510461146393 |
| 0.8574605919938809 | 0.6294094528709452 | 0.3354834751107866 |
| 0.5437155348804947 | 0.9708898050918566 | 0.6636885513151771 |
| 0.5791120245910721 | 0.6247727539563951 | 0.8694026733398533 |
| 0.6122332687456477 | 0.6834096922453782 | 0.8677684612911077 |

### The perfect Ir<sub>7</sub>-[TS-2H]\* surface

O In Ir In H

1.0000000000000000  
12.5091307398836005 -7.2221500000000001 0.0000000000000000  
0.0000000000000000 14.4443000000000001 0.0000000000000000  
0.0000000000000000 0.0000000000000000 17.9855000000000018

O In Ir In H  
72 27 1 20 2

Direct

0.8407902198846923 0.6144689302907195 0.4575717072257133  
0.5157982110190639 0.9535979415841755 0.2892106703917411  
0.1688070329803678 0.2795431445257277 0.6184903703632332  
0.7931191969831152 0.9626192633653200 0.2977483471067126  
0.4679647532102282 0.2902950911604550 0.6530928326694924  
0.1346033732378803 0.6268430019559965 0.4707082517100025  
0.3010802260703859 0.7318643980284240 0.3007176491173140  
0.9775632418951560 0.0716856405788763 0.6351173558780997  
0.6398525233978444 0.4070873920059095 0.4673618493392416  
0.5296661816908799 0.2116297836909848 0.2700488422027322  
0.1884820836835782 0.5413570723343100 0.6121798634217673  
0.8588982085152054 0.8853551009329977 0.4409640939304421  
0.8877382062405482 0.1318018564927608 0.4559153018301751  
0.5482239770373853 0.4644445021107131 0.2914642104444001  
0.2204511757203952 0.7918425138598397 0.6202030519362612  
0.5388891574001250 0.7324795391960069 0.2987120233238090  
0.2058186109806622 0.0768458785803874 0.6581875964506310  
0.8745327676935017 0.4079919793411613 0.4697304849643973  
0.7682484725275222 0.4699184455130725 0.3005196699339347  
0.4310359547275937 0.8009887489730911 0.6382926656539580  
0.0944380973515581 0.1346766329552914 0.4624802541960407  
0.2907260080102592 0.2203552895509033 0.2691341034401475  
0.9594526309397780 0.5442541401034932 0.6112560549299419  
0.6180353518404729 0.8743976946407035 0.4414123648232958  
0.3760672914528060 0.6590352301859875 0.4589891355761425  
0.0371053601372927 0.9847846790724235 0.2878169089058045  
0.7078709070181032 0.3292499736474854 0.6221531509653270  
0.7669896224894045 0.7080024181041563 0.3004629195286376  
0.4227104152598945 0.0265690512732191 0.6541765423375385  
0.0913153942660413 0.3668963527051967 0.4694798005100129  
0.0313786158295361 0.2003431218669350 0.2989553904598686  
0.6927838200175174 0.5280630699016433 0.6381949976732149  
0.3644919433969971 0.8604111152199740 0.4648618225339849  
0.2810325495049187 0.9712429865554888 0.2682019008872035

|                    |                    |                    |
|--------------------|--------------------|--------------------|
| 0.9558240322194750 | 0.3171948005880353 | 0.6125500737450650 |
| 0.6230317489325851 | 0.6462092998525298 | 0.4455459461943875 |
| 0.2271473172672563 | 0.3188791321194785 | 0.3782563512751512 |
| 0.8847446978987110 | 0.6492307397206744 | 0.7098577990098506 |
| 0.5572391245162368 | 0.9873633158766449 | 0.5432867230772523 |
| 0.2673680917592144 | 0.9760033479614191 | 0.5311596785095489 |
| 0.9286405218342644 | 0.3078906854765735 | 0.3432423829553447 |
| 0.6031581370906260 | 0.6535069652382510 | 0.6996655174103732 |
| 0.7588001077671687 | 0.1958263627969344 | 0.5361743580370504 |
| 0.4229523071089373 | 0.5291696575713990 | 0.3656377421473011 |
| 0.0997616711554614 | 0.8671440445286579 | 0.6997527605532607 |
| 0.5484261754380472 | 0.7292289575531418 | 0.5663799875833030 |
| 0.2159364846793431 | 0.0596926334520960 | 0.3865253734222400 |
| 0.8703356315170471 | 0.3913983691733733 | 0.7308253392570383 |
| 0.1824204856688610 | 0.8104489569738808 | 0.3787163834289509 |
| 0.8512208748546035 | 0.1367977341025288 | 0.7104758972848847 |
| 0.5121153586587964 | 0.4715430793361623 | 0.5468516341697491 |
| 0.5252657267195180 | 0.1926193698015448 | 0.5312035230851994 |
| 0.1956065267573454 | 0.5237221742838443 | 0.3509776618186926 |
| 0.8639118174006210 | 0.8705382014750369 | 0.7031399063050219 |
| 0.3039198484465527 | 0.4634243021187229 | 0.5343839331372729 |
| 0.9712298161432928 | 0.7946043589775318 | 0.3639177709405341 |
| 0.6322419977813827 | 0.1320069136563254 | 0.7012957543811236 |
| 0.7844079940609440 | 0.7293559016791464 | 0.5589881622531436 |
| 0.4396623958579117 | 0.0564831870700927 | 0.3877302546289563 |
| 0.1109726012342417 | 0.3818349972239519 | 0.7296069820252270 |
| 0.6900867525265284 | 0.2737615839896297 | 0.3803018432358650 |
| 0.3758107439338093 | 0.6204629889983587 | 0.7084937888699726 |
| 0.0304814905411558 | 0.9436180114844549 | 0.5435279184740421 |
| 0.3057280016626499 | 0.2313863201554312 | 0.5304393662674184 |
| 0.9778493177808234 | 0.5728306021517333 | 0.3497211795189243 |
| 0.6295283783365394 | 0.8848176722494142 | 0.6942906721385032 |
| 0.0358363548704665 | 0.7413277071355089 | 0.5345491734145279 |
| 0.7059804109516279 | 0.0781842517247171 | 0.3646745831128507 |
| 0.3634315405683168 | 0.3976049949983514 | 0.6988035550810268 |
| 0.7759776391972866 | 0.9603903275069479 | 0.5575251592301871 |
| 0.4436792195782062 | 0.2846113123215095 | 0.3894986091567015 |
| 0.1181685033683875 | 0.6288128658533533 | 0.7300670196255336 |
| 0.1400327109484681 | 0.1462343917020670 | 0.3306095036055531 |
| 0.8113979269472089 | 0.4832567513717089 | 0.6755075016770568 |
| 0.5985781135095321 | 0.6246326040934012 | 0.3233522187506756 |
| 0.2556028369892905 | 0.9549805369748986 | 0.6531553249902624 |
| 0.9250387336132604 | 0.2915371144707096 | 0.4967184650802310 |
| 0.4712613397667731 | 0.8146387300732877 | 0.5102640040279446 |

|                    |                    |                    |
|--------------------|--------------------|--------------------|
| 0.3542236664903768 | 0.8953696937058050 | 0.3310497188138021 |
| 0.0172932436228929 | 0.2302639201061688 | 0.6751219841826392 |
| 0.8769089313005576 | 0.8770223424788662 | 0.3207948618082165 |
| 0.5446758199712523 | 0.1998337003306298 | 0.6529917810938698 |
| 0.2096741885773490 | 0.5350155764015386 | 0.4941865377885502 |
| 0.6887216436184024 | 0.5605839438043997 | 0.5156247798299398 |
| 0.6055472731314477 | 0.3606795487162183 | 0.3339477039006796 |
| 0.2668635325085425 | 0.6881721580636775 | 0.6749104819524443 |
| 0.6249911692129143 | 0.9022288690832420 | 0.3208092481641767 |
| 0.2951863669273457 | 0.2421905909837659 | 0.6520868631554403 |
| 0.9650281815939407 | 0.5753906874665202 | 0.4947631407285590 |
| 0.9428156111681208 | 0.0330787285448898 | 0.5124053609772907 |
| 0.9316933726156400 | 0.7910305201982705 | 0.4867381657914389 |
| 0.4736702812109225 | 0.3095898798742169 | 0.5057465034368431 |
| 0.1451857734690253 | 0.6465623576105090 | 0.3485730777154508 |
| 0.8034847962787383 | 0.9771715830486930 | 0.6774099241459403 |
| 0.5882851632854852 | 0.1200497928194506 | 0.3252335763507494 |
| 0.2568975619983958 | 0.4495736858235058 | 0.6635988613332482 |
| 0.7116323080714565 | 0.0436087856734647 | 0.4867123315675687 |
| 0.1901737236387359 | 0.0644644768762433 | 0.5018608644361310 |
| 0.8541467860679243 | 0.3999336819399089 | 0.3477228142199777 |
| 0.5148338474225531 | 0.7287254088928514 | 0.6727212885283467 |
| 0.3815423144130786 | 0.3696770993196764 | 0.3255265556490761 |
| 0.0450464253640106 | 0.7059537862372219 | 0.6661974287545630 |
| 0.4574279273871671 | 0.5666332358017780 | 0.4878940654913057 |
| 0.4344324407815558 | 0.0268456166613627 | 0.5034985088207057 |
| 0.0999861256723484 | 0.3557567452404389 | 0.3473676383745767 |
| 0.7767838749614693 | 0.7031103533692755 | 0.6786054492596744 |
| 0.1305076260274985 | 0.9119465997039543 | 0.3234576046163112 |
| 0.7941411631565736 | 0.2416822023484965 | 0.6683430873947983 |
| 0.6999708153666033 | 0.3017462481606641 | 0.5010234914796052 |
| 0.7045488621431443 | 0.8049377396585600 | 0.5003457435530847 |
| 0.1982089210576554 | 0.2984065497200273 | 0.4983060290833949 |
| 0.2001815841221502 | 0.8013427949890551 | 0.4996752320808514 |
| 0.8706089460095183 | 0.1299961015371178 | 0.3343917869099876 |
| 0.5268730747761718 | 0.4636879990398596 | 0.6693041807277947 |
| 0.3730720799911457 | 0.6433465113303890 | 0.3362729435604271 |
| 0.0298879289115006 | 0.9588753640694830 | 0.6652805993716706 |
| 0.3668167897698594 | 0.1339943147408530 | 0.3131613359916531 |
| 0.0321349902859166 | 0.4664150513807681 | 0.6864104067473942 |
| 0.8568833515650801 | 0.6302877533925572 | 0.3362315780281586 |
| 0.5439779790909192 | 0.9725481471903032 | 0.6640640713782457 |
| 0.5733271970990723 | 0.5238520423601426 | 0.7782937631698224 |
| 0.5848947754908495 | 0.5884105458411282 | 0.7549204637485476 |

### The perfect Ir<sub>7</sub>-2H\* surface

O In Ir In H

1.000000000000000  
12.5091307398835667 -7.2221499999999965 0.000000000000000  
0.0000000000000000 14.4442999999999984 0.000000000000000  
0.0000000000000000 0.0000000000000000 17.9854999999999947

O In Ir In H  
72 27 1 20 2

Direct

0.8405394395252963 0.6146298205643975 0.4573673851737889  
0.5156207517099473 0.9532762011625062 0.2882982822810543  
0.1658837492036687 0.2782474686887109 0.6170848635885321  
0.7925133779811351 0.9621345404719992 0.2968568801631616  
0.4647168327057649 0.2859772817569227 0.6452706322638398  
0.1344701960345667 0.6265845809999726 0.4704540921120486  
0.3014696122348107 0.7308729682772288 0.3010077578230672  
0.9764446131485692 0.0705106967447512 0.6347599380298400  
0.6390245256116325 0.4069759860999093 0.4675522023268320  
0.5290967966466524 0.2119781550006866 0.2704927739454226  
0.1876758536926519 0.5403072403455338 0.6118733934738991  
0.8589505644607766 0.8856539902339107 0.4398495407853416  
0.8873579207618532 0.1320061903763018 0.4550661794738390  
0.5476130669104545 0.4636215574123835 0.2922330535620115  
0.2198209119392078 0.7915220229351367 0.6197945087742509  
0.5383221909798647 0.7313060750843070 0.2990133438804375  
0.2053696177336860 0.0767319341656037 0.6566452869507280  
0.8743932916258554 0.4078715097890951 0.4691706419145516  
0.7672489341246826 0.4694254607808087 0.3008853482080696  
0.4288805867139043 0.8012880299970062 0.6367365062903456  
0.0932735606488723 0.1337365213166721 0.4609502713474668  
0.2908219125983754 0.2201601809758710 0.2695312906259379  
0.9596343435538405 0.5444307787214890 0.6108416467612142  
0.6182358707668868 0.8746797781484467 0.4403439106357025  
0.3763612584674381 0.6580306085314430 0.4599621256624510  
0.0366186658674363 0.9841364694342293 0.2866947428032713  
0.7071712824731964 0.3296937218923783 0.6218499868236030  
0.7661414792498850 0.7073979274124627 0.3007898693461585  
0.4222081286991837 0.0258322617433164 0.6541495779453642  
0.0902869402086502 0.3665415891971366 0.4686609123744473  
0.0305177223343323 0.1996363209600559 0.2979760315961289  
0.7002950426330274 0.5344080515107813 0.6353198775276060  
0.3642072284851540 0.8599205940245834 0.4640534509588851  
0.2807724814613711 0.9707809595280026 0.2674969057138236

|                    |                    |                    |
|--------------------|--------------------|--------------------|
| 0.9551286454217598 | 0.3168949467494335 | 0.6121724585688673 |
| 0.6226293132765142 | 0.6455967226521142 | 0.4464895836629193 |
| 0.2257232540903581 | 0.3183566391150979 | 0.3773276514647457 |
| 0.8884821370717815 | 0.6493442225271846 | 0.7127392372061500 |
| 0.5570271381264904 | 0.9869702028910140 | 0.5423953679917216 |
| 0.2674922772836921 | 0.9759022205721621 | 0.5303423930328179 |
| 0.9280829750432529 | 0.3076242160742116 | 0.3417561729867749 |
| 0.6056269489841533 | 0.6586177110784424 | 0.7042082117187157 |
| 0.7585104443452738 | 0.1957411418429363 | 0.5359897099486716 |
| 0.4231397206151726 | 0.5282469595243202 | 0.3676666425320538 |
| 0.0997128131117698 | 0.8675022233436334 | 0.6991296196315643 |
| 0.5508454460417036 | 0.7319139736699507 | 0.5667218058523223 |
| 0.2149965721326043 | 0.0584968438482199 | 0.3857577775505578 |
| 0.8700718531186609 | 0.3909621258878500 | 0.7303863405858398 |
| 0.1820418792939486 | 0.8097526129379080 | 0.3779017801636976 |
| 0.8503458125924037 | 0.1361246149291299 | 0.7097241305545752 |
| 0.5143423418105378 | 0.4734781504349002 | 0.5528430042775457 |
| 0.5263993634861932 | 0.1913465806784828 | 0.5297508201957265 |
| 0.1954611111804333 | 0.5231190840406620 | 0.3510992930743368 |
| 0.8634472784338026 | 0.8696183279197339 | 0.7029333679004814 |
| 0.3025972848745248 | 0.4620693576674202 | 0.5340442086895603 |
| 0.9710136990869186 | 0.7942022631664569 | 0.3630278798748135 |
| 0.6319774213022641 | 0.1325602724069272 | 0.7010120688612058 |
| 0.7861617742436793 | 0.7325217914949256 | 0.5581207141075349 |
| 0.4389819408728696 | 0.0553926063572901 | 0.3866087898439314 |
| 0.1100656937136790 | 0.3809621283255140 | 0.7293816761815023 |
| 0.6899712663664386 | 0.2732997655739498 | 0.3801232096100738 |
| 0.3739900547995513 | 0.6217234658734404 | 0.7088531951706302 |
| 0.0305268849345267 | 0.9437666734239636 | 0.5426885215679884 |
| 0.3034732137304489 | 0.2313160101388013 | 0.5286958635407737 |
| 0.9776766982641500 | 0.5723529800702689 | 0.3491631417446548 |
| 0.6290201158869808 | 0.8872205002905930 | 0.6931834982553695 |
| 0.0358019512425339 | 0.7414870304743478 | 0.5338603160583149 |
| 0.7055694287917255 | 0.0780360595238919 | 0.3637995979776922 |
| 0.3615014285435998 | 0.3959483438982948 | 0.6974751366843600 |
| 0.7762341722807767 | 0.9609934878722498 | 0.5563569499080706 |
| 0.4429992346687697 | 0.2842608465007663 | 0.3917239110103906 |
| 0.1175340739886984 | 0.6280114079119220 | 0.7301406649037432 |
| 0.1392502464498579 | 0.1455868093133648 | 0.3298529973340160 |
| 0.8118862760983528 | 0.4834420101120843 | 0.6754239416264002 |
| 0.5977633962541756 | 0.6234832785596999 | 0.3243697633284421 |
| 0.2554131322306969 | 0.9552021917674048 | 0.6522927868007959 |
| 0.9245139066787820 | 0.2913197966272018 | 0.4964596422019223 |
| 0.4716000432722814 | 0.8144930319636072 | 0.5089752793299719 |



|                    |                    |                    |
|--------------------|--------------------|--------------------|
| 0.3538428373355046 | 0.8945736034464663 | 0.3300978116523437 |
| 0.0162032377668305 | 0.2296425708511968 | 0.6747825524381833 |
| 0.8764650568111614 | 0.8766400546127395 | 0.3198828536459527 |
| 0.5441607085743793 | 0.1987913227276985 | 0.6516103316703731 |
| 0.2093884049648680 | 0.5344657549732901 | 0.4938380577084642 |
| 0.6883599507933280 | 0.5605099545649964 | 0.5161085299258740 |
| 0.6046305614119137 | 0.3602010784301570 | 0.3357306294470245 |
| 0.2651677422115699 | 0.6870481234313812 | 0.6745444305988716 |
| 0.6244323190976752 | 0.9015830370712141 | 0.3198589964679904 |
| 0.2931255671558473 | 0.2423119770637604 | 0.6501853763348090 |
| 0.9646861171910901 | 0.5753020569785209 | 0.4943627676146060 |
| 0.9425677644925190 | 0.0329342119871962 | 0.5113440313551982 |
| 0.9319899714486586 | 0.7913849728314659 | 0.4855835185574683 |
| 0.4737788964058685 | 0.3105819539843903 | 0.5091846110881763 |
| 0.1450785803454185 | 0.6459083388184010 | 0.3482902555366132 |
| 0.8027507196843630 | 0.9766983878013672 | 0.6759801356558640 |
| 0.5879011269457727 | 0.1199193436588914 | 0.3245454544941892 |
| 0.2562236996192395 | 0.4484008155840761 | 0.6632696930323660 |
| 0.7114006653009007 | 0.0439213255789182 | 0.4858428165328252 |
| 0.1900890115409831 | 0.0644985122591418 | 0.5009535865301210 |
| 0.8536822154080003 | 0.3995746187257514 | 0.3471511720186994 |
| 0.5114913718249748 | 0.7314951774408177 | 0.6723486813881510 |
| 0.3813017806430049 | 0.3688895542854629 | 0.3270497653159577 |
| 0.0461812725239430 | 0.7060112844974376 | 0.6660102956890810 |
| 0.4579349671146505 | 0.5652133154038440 | 0.4909615248342726 |
| 0.4343020768176112 | 0.0264808227550696 | 0.5022322804016118 |
| 0.0990056817082887 | 0.3551602355524685 | 0.3466024570397955 |
| 0.7847510024387363 | 0.7039978225146812 | 0.6759102061123119 |
| 0.1301450418016342 | 0.9112835635286071 | 0.3223892195839643 |
| 0.7936078558370695 | 0.2416294027076992 | 0.6677960744825316 |
| 0.6997365749404053 | 0.3018358983935004 | 0.5006840327316086 |
| 0.7046934808922076 | 0.8054901246156384 | 0.4994307028362813 |
| 0.1966142626070023 | 0.2976196078532404 | 0.4972291545255682 |
| 0.1999592982461417 | 0.8011459428891239 | 0.4989194249193596 |
| 0.8699611507346682 | 0.1296663421599584 | 0.3335147606004992 |
| 0.5311287490331932 | 0.4566384774734378 | 0.6798609420992160 |
| 0.3730141141818985 | 0.6419759894519202 | 0.3373810248720381 |
| 0.0303103649929188 | 0.9594121325473588 | 0.6643782716000193 |
| 0.3663794709049507 | 0.1336544877015621 | 0.3135366158475529 |
| 0.0316603750742317 | 0.4656760621636393 | 0.6861170041865202 |
| 0.8562389731892497 | 0.6297115119758983 | 0.3361421487966137 |
| 0.5437707606381259 | 0.9735189811349892 | 0.6631070983817238 |
| 0.5773785332852313 | 0.4633794583194163 | 0.7720685885371520 |
| 0.5985973960715943 | 0.6513522553098421 | 0.7579191202266397 |

### The perfect Ir<sub>7</sub>-[TS-H<sub>2</sub>O]\* surface

O In Ir In H

1.0000000000000000  
12.5091307398836005 -7.2221500000000001 0.0000000000000000  
0.0000000000000000 14.4443000000000001 0.0000000000000000  
0.0000000000000000 0.0000000000000000 17.9855000000000018

O In Ir In H  
72 27 1 20 2

Direct

0.8401696450581656 0.6141937295987396 0.4579108449606070  
0.5159299912259946 0.9529850540121205 0.2887886225158438  
0.1634613343901562 0.2768046358628578 0.6162590554233842  
0.7927846324911523 0.9620416885288787 0.2975328622779784  
0.4624522678998375 0.2843665401734249 0.6554607499486917  
0.1350479288265627 0.6259693565072658 0.4707752539539795  
0.3020264243829986 0.7308656217289782 0.3017633155664153  
0.9761291001735909 0.0699596113317353 0.6350783236643149  
0.6388449033341864 0.4066720504504893 0.4666645010355821  
0.5295098013529806 0.2112811843267355 0.2697401561602433  
0.1867028331443425 0.5387345364005707 0.6126166664817665  
0.8582438660882791 0.8846815998663796 0.4407912055899446  
0.8875957760681433 0.1319989493054665 0.4555558862811173  
0.5479825031892227 0.4639858033165531 0.2918510731302162  
0.2198689217174349 0.7899171805384013 0.6202219527215667  
0.5387469087092823 0.7313294127711035 0.2999790893523825  
0.2035188277945782 0.0733918620320747 0.6567380663030011  
0.8738018656562038 0.4074417860818997 0.4694392283557279  
0.7680874924382313 0.4694298016431157 0.3003282097465587  
0.4282825684200031 0.8005790283635424 0.6369047795322051  
0.0936541414325587 0.1329965858866060 0.4610470141803132  
0.2904283909083473 0.2198176722252325 0.2689276523102943  
0.9603500926305496 0.5440280938630394 0.6108755275966357  
0.6180548513586139 0.8740673309506661 0.4416650769138959  
0.3769030576158235 0.6574322196236652 0.4610539756108388  
0.0366996866922580 0.9838031515849796 0.2874725123242060  
0.7061957770817435 0.3295123105517837 0.6214768898122021  
0.7659498538950302 0.7071143300048431 0.3018227356507855  
0.4218824626544066 0.0254530992387247 0.6547543869695128  
0.0903976964979610 0.3664099903477626 0.4687923068227614  
0.0308949347824167 0.1995746499871638 0.2984923036156611  
0.7014370731392557 0.5354135031389752 0.6376412334261492  
0.3649201716481010 0.8595383601705279 0.4646179200711646  
0.2810235349089067 0.9702856845457193 0.2676909228455788

|                    |                    |                    |
|--------------------|--------------------|--------------------|
| 0.9540680311541865 | 0.3165223561069134 | 0.6122277208309661 |
| 0.6224847095148319 | 0.6452473285073781 | 0.4484743659491411 |
| 0.2263846764756472 | 0.3180763039832315 | 0.3777934909326904 |
| 0.8908735047102518 | 0.6482945721091925 | 0.7148386266523528 |
| 0.5569121245830642 | 0.9876752770718634 | 0.5429626849634133 |
| 0.2672285815165119 | 0.9746340191758904 | 0.5307999052258150 |
| 0.9282580964904891 | 0.3074878429937656 | 0.3419700624890919 |
| 0.6223519313849689 | 0.6886496971752958 | 0.7244184123018612 |
| 0.7577246086688358 | 0.1954897081265115 | 0.5358703335664733 |
| 0.4234810511022380 | 0.5279402232671658 | 0.3680656093353892 |
| 0.0991989440303524 | 0.8656885557700724 | 0.6993977559840036 |
| 0.5527552457391783 | 0.7331926671034873 | 0.5709307631587350 |
| 0.2158572489057570 | 0.0585306216215482 | 0.3859470628266894 |
| 0.8689962694490988 | 0.3903071970021461 | 0.7306776057367016 |
| 0.1824389077914445 | 0.8095334978181198 | 0.3782806526101778 |
| 0.8501889361280388 | 0.1365877126889987 | 0.7103529767245887 |
| 0.5120201764756905 | 0.4688564004401489 | 0.5512688438017157 |
| 0.5235876224466613 | 0.1921547023640253 | 0.5311347948420434 |
| 0.1959236910690931 | 0.5228891767069229 | 0.3508551465336640 |
| 0.8650954634277438 | 0.8705364392860551 | 0.7044423694179694 |
| 0.3026945638452387 | 0.4611540940710132 | 0.5352754140354671 |
| 0.9711143268018034 | 0.7938508425618134 | 0.3633697043800555 |
| 0.6316923423316506 | 0.1336690181220252 | 0.7019419232907921 |
| 0.7870867771495730 | 0.7322580646333894 | 0.5594964824053636 |
| 0.4394951708496757 | 0.0557363060050992 | 0.3870764329946120 |
| 0.1077535423147166 | 0.3793143179885828 | 0.7302293430314077 |
| 0.6896529739906029 | 0.2730529854048436 | 0.3800093818367551 |
| 0.3740054932581563 | 0.6216755213337187 | 0.7102333852730176 |
| 0.0303401751951524 | 0.9430994040679346 | 0.5429705345878627 |
| 0.3038379378670932 | 0.2297556165622829 | 0.5304686693417121 |
| 0.9778986153127961 | 0.5722651553972591 | 0.3503366172517620 |
| 0.6314356443706670 | 0.8939792996652588 | 0.6948767910748407 |
| 0.0361278782924810 | 0.7409075772181896 | 0.5338498024229242 |
| 0.7057338520482555 | 0.0776617723536907 | 0.3644175724153654 |
| 0.3513156876360448 | 0.3870831357801374 | 0.7029332651942847 |
| 0.7767470644641605 | 0.9614395530841042 | 0.5569034105162765 |
| 0.4427518958649546 | 0.2833830484581868 | 0.3895319320352066 |
| 0.1175939542371338 | 0.6266569171090661 | 0.7312165764661798 |
| 0.1395523837153535 | 0.1453163493257634 | 0.3302504311271028 |
| 0.8124499759028446 | 0.4830508598427089 | 0.6748714824081116 |
| 0.5979663658522930 | 0.6234376170794190 | 0.3256975444855295 |
| 0.2549384764981354 | 0.9531217238468298 | 0.6527179007647984 |
| 0.9243566008243185 | 0.2912872043733294 | 0.4965909097037350 |
| 0.4719021692130084 | 0.8137560022061294 | 0.5108794383003924 |

|                    |                    |                    |
|--------------------|--------------------|--------------------|
| 0.3542899264526523 | 0.8944398025360339 | 0.3308799762378878 |
| 0.0150633525883224 | 0.2290263860671328 | 0.6747662572634661 |
| 0.8764841777571108 | 0.8764199202873408 | 0.3209334867420239 |
| 0.5435312142838500 | 0.1992283204635593 | 0.6528475169765318 |
| 0.2095353718747757 | 0.5337188490573130 | 0.4949478507095924 |
| 0.6882309683405994 | 0.5592593881517198 | 0.5176567042175398 |
| 0.6051363355507829 | 0.3601426517760165 | 0.3342748485897682 |
| 0.2650191716383794 | 0.6852854553086308 | 0.6754348368283226 |
| 0.6247285516069397 | 0.9013924709727680 | 0.3210701194919039 |
| 0.2882647498404027 | 0.2379582312896723 | 0.6520293484738731 |
| 0.9649474748081239 | 0.5749871670744936 | 0.4943489387727164 |
| 0.9426802351166871 | 0.0326313872368777 | 0.5116698091101286 |
| 0.9320578810851964 | 0.7908138252109752 | 0.4859325473838115 |
| 0.4722907317672406 | 0.3097446416308146 | 0.5059160740741941 |
| 0.1454628730439409 | 0.6455542362240935 | 0.3487315402869638 |
| 0.8033850633940803 | 0.9776501514470340 | 0.6763012665478922 |
| 0.5881453795904947 | 0.1195257275683010 | 0.3247085168320211 |
| 0.2541597612615107 | 0.4468421551408403 | 0.6647567503501763 |
| 0.7113348670653937 | 0.0435513069322699 | 0.4864171225670113 |
| 0.1898923807800649 | 0.0631924250388345 | 0.5011827031896541 |
| 0.8537869637792695 | 0.3993439933863194 | 0.3475296548127015 |
| 0.5125202782862780 | 0.7360488581388385 | 0.6772304411357308 |
| 0.3812371787982544 | 0.3690323010790088 | 0.3259020849753776 |
| 0.0473220980559124 | 0.7048108518104621 | 0.6666999614584994 |
| 0.4576662685061175 | 0.5644528280055084 | 0.4917812142459264 |
| 0.4341936697012677 | 0.0263516586683860 | 0.5026793489507844 |
| 0.0994143930132519 | 0.3550650446990011 | 0.3469427792640527 |
| 0.7910481455915467 | 0.7055149566659716 | 0.6767762494609716 |
| 0.1304259151123851 | 0.9109777490928923 | 0.3228835620938605 |
| 0.7929252879950166 | 0.2413180835520433 | 0.6678478443053062 |
| 0.6987458165911908 | 0.3013887390589418 | 0.5006789841242232 |
| 0.7042554744731140 | 0.8049803186679538 | 0.5018289259396140 |
| 0.1965614707177711 | 0.2969140386164442 | 0.4975826003111607 |
| 0.2004806955387654 | 0.8002381093670696 | 0.4993012775722885 |
| 0.8703124780047187 | 0.1295753818565946 | 0.3340810594355997 |
| 0.5215523138861256 | 0.4508934033307641 | 0.6789255401212833 |
| 0.3734557697032261 | 0.6419817906616837 | 0.3382454322419540 |
| 0.0302862145889836 | 0.9586063292245259 | 0.6647236642518186 |
| 0.3665587660404485 | 0.1333115980614808 | 0.3126769274291476 |
| 0.0308522398877905 | 0.4646957490968022 | 0.6868314033121393 |
| 0.8560995558979242 | 0.6293580955270839 | 0.3367353052339272 |
| 0.5439446032053972 | 0.9749113933838012 | 0.6635665107921608 |
| 0.5751961431677933 | 0.5787828285498408 | 0.7324169469249106 |
| 0.6364323126422841 | 0.7185049939283890 | 0.7746147715154108 |

### The perfect Ir<sub>7</sub>-H<sub>2</sub>O\* surface

O In Ir In H

1.000000000000000  
12.5091307398835667 -7.2221499999999965 0.000000000000000  
0.0000000000000000 14.4442999999999984 0.0000000000000000  
0.0000000000000000 0.0000000000000000 17.9854999999999947

O In Ir In H  
72 27 1 20 2

Direct

0.8412351658066555 0.6146253285557384 0.4569946587345056  
0.5164335305717310 0.9533109340720622 0.2889877163586851  
0.1714586263354866 0.2796705609547042 0.6207377768733626  
0.7936748196499708 0.9629874840907261 0.2977284918896639  
0.4618091836544351 0.2810318370217298 0.6663052613258376  
0.1356844527707569 0.6273533087324443 0.4706090377495522  
0.3015881831269805 0.7313938761531174 0.3005133429998179  
0.9770817927273940 0.0705629191134926 0.6359110424875214  
0.6405944960185728 0.4076665129830470 0.4661823053824639  
0.5306915665199620 0.2104106578713698 0.2666605963870006  
0.1854458382728044 0.5391567673493136 0.6115134784506114  
0.8586619915546355 0.8844658079261813 0.4416946645417553  
0.8881001769604805 0.1322431361568762 0.4558852426215571  
0.5487588013202352 0.4651217898172994 0.2893964515019776  
0.2197084364365147 0.7913223447539913 0.6202726932192018  
0.5394893869147770 0.7324927580444701 0.2990326115508645  
0.2052844871063780 0.0752061799216608 0.6631116069988359  
0.8743566158881366 0.4067448005710146 0.4691866262528938  
0.7700245314435841 0.4698517520707767 0.2983472253069085  
0.4251939543386005 0.7990497356996548 0.6331416233880693  
0.0961041097237956 0.1354153926231028 0.4631297213137454  
0.2906634011156142 0.2206662519787944 0.2668622647833925  
0.9576861940461922 0.5417781964952813 0.6100357204244449  
0.6191491649295650 0.8747736561532027 0.4416547284292828  
0.3764870883348411 0.6586736925993161 0.4594166842125092  
0.0372491876743456 0.9846447588929007 0.2876301421309020  
0.7042374436240415 0.3329776764999359 0.6215507617823078  
0.7672374206181172 0.7079203762841005 0.3009682728164371  
0.4222913383511599 0.0245633764986205 0.6561041225052240  
0.0928512931877321 0.3660905752566828 0.4699873784451932  
0.0322741828328498 0.2003875988457789 0.2988915925068159  
0.6886255618711378 0.5384853474476664 0.6502626942820647  
0.3656615462707939 0.8607418561461271 0.4640055980867474  
0.2812067309753796 0.9703233768009389 0.2666794225208536

|                    |                    |                    |
|--------------------|--------------------|--------------------|
| 0.9567219924800596 | 0.3152069197766902 | 0.6124059492622436 |
| 0.6238911901190848 | 0.6473318521607638 | 0.4474137437421439 |
| 0.2288894893273805 | 0.3184384698923307 | 0.3786490645848710 |
| 0.8905075108100113 | 0.6438741212265473 | 0.7137425299717477 |
| 0.5576400754415400 | 0.9884435568010823 | 0.5428105535727586 |
| 0.2680383898012570 | 0.9760810935497000 | 0.5318357912819844 |
| 0.9295943299850580 | 0.3075873283746901 | 0.3437038807818082 |
| 0.5952843422377919 | 0.6777743777451014 | 0.7501953328105370 |
| 0.7589746881745500 | 0.1969239779809517 | 0.5373316503305511 |
| 0.4246145563137804 | 0.5291005270156407 | 0.3670384793335215 |
| 0.0963392172335388 | 0.8640211218271551 | 0.6983687481719554 |
| 0.5529956142036235 | 0.7324403261331409 | 0.5718133430207301 |
| 0.2172419185401657 | 0.0603821313086140 | 0.3851452414819347 |
| 0.8695920247522178 | 0.3875399956251193 | 0.7304701768925014 |
| 0.1830033481646142 | 0.8108126706299232 | 0.3782366105100852 |
| 0.8527503864317043 | 0.1372267237452787 | 0.7120750399412887 |
| 0.5126511028445772 | 0.4671370770126116 | 0.5450195714037689 |
| 0.5238628729167063 | 0.1929976333286345 | 0.5317559046238401 |
| 0.1964237488777238 | 0.5233251359179447 | 0.3517127475302679 |
| 0.8611797827392275 | 0.8695205964501116 | 0.7059793272804914 |
| 0.3052675030907619 | 0.4637427246468231 | 0.5366235680793561 |
| 0.9721286456413243 | 0.7946756877663752 | 0.3633748669007834 |
| 0.6338147067612805 | 0.1336533588393587 | 0.7008602534317954 |
| 0.7873294993123641 | 0.7284568840473209 | 0.5597354480699556 |
| 0.4398577764715026 | 0.0572782885241394 | 0.3864824475604618 |
| 0.1110434290611388 | 0.3809796590479076 | 0.7306081157920326 |
| 0.6894158274393987 | 0.2738098245598286 | 0.3792910351931960 |
| 0.3653119649574953 | 0.6207784284689075 | 0.7140369782706537 |
| 0.0315296472793682 | 0.9441662959572052 | 0.5436848032202145 |
| 0.3076642100166087 | 0.2304423462640237 | 0.5325088504863784 |
| 0.9781657529518221 | 0.5724574857325075 | 0.3509606512486353 |
| 0.6309231070225083 | 0.8924782841306316 | 0.6946994044350459 |
| 0.0362686442503501 | 0.7404506854860201 | 0.5342003844424543 |
| 0.7064422299758080 | 0.0785921198249972 | 0.3649084839843383 |
| 0.3675849134965578 | 0.4023734484272389 | 0.7017482991890079 |
| 0.7781484723597548 | 0.9625047554193630 | 0.5568736002350556 |
| 0.4445318322723924 | 0.2834399452606911 | 0.3844003913286668 |
| 0.1147819817165407 | 0.6256371411196567 | 0.7305583919998335 |
| 0.1410872541489466 | 0.1464305733784790 | 0.3295872129838877 |
| 0.8114931930950671 | 0.4799673133962321 | 0.6767031959481857 |
| 0.5989158706331195 | 0.6246678189435803 | 0.3241166158037398 |
| 0.2550282136614322 | 0.9543307458210678 | 0.6540437241270192 |
| 0.9260749103955443 | 0.2917189563078912 | 0.4964385678256129 |
| 0.4727997875961037 | 0.8142140446318812 | 0.5099092539437268 |

|                    |                    |                    |
|--------------------|--------------------|--------------------|
| 0.3547394485506404 | 0.8950431873062351 | 0.3306341848873691 |
| 0.0184050033421393 | 0.2296693528973531 | 0.6764184057136119 |
| 0.8769815975332164 | 0.8769994607334904 | 0.3211027649634369 |
| 0.5435515587079166 | 0.1978325225678030 | 0.6537951243987130 |
| 0.2100605548542639 | 0.5346043128159332 | 0.4939794589644558 |
| 0.6890861798158660 | 0.5612361817614115 | 0.5137686730809123 |
| 0.6066948956087979 | 0.3604893626633854 | 0.3288505155697699 |
| 0.2618259457353794 | 0.6853022341557178 | 0.6746798606254711 |
| 0.6255569721994610 | 0.9020873307334321 | 0.3210464609267586 |
| 0.2935713666750289 | 0.2400362104223465 | 0.6551832575837528 |
| 0.9654017225182872 | 0.5745863990195142 | 0.4933621859752544 |
| 0.9438018275656667 | 0.0333624903342115 | 0.5116502717109183 |
| 0.9341083049118729 | 0.7919460779598539 | 0.4852931010839980 |
| 0.4724376025308935 | 0.3066211235203560 | 0.4988323682687270 |
| 0.1458992944707679 | 0.6464212836329313 | 0.3484224177887483 |
| 0.8022510184378052 | 0.9790298448339927 | 0.6757981993230993 |
| 0.5886476378716713 | 0.1197459260182608 | 0.3243837584982139 |
| 0.2570086352138499 | 0.4509693607869024 | 0.6646113828189193 |
| 0.7118959457615245 | 0.0445611666974461 | 0.4864468787556768 |
| 0.1912121323116938 | 0.0641149967264211 | 0.5004176398347684 |
| 0.8544606943381954 | 0.3991376864713311 | 0.3471530853175931 |
| 0.5034156631822724 | 0.7336288749516690 | 0.6786794003967894 |
| 0.3818239037396461 | 0.3705219964265519 | 0.3233876497998292 |
| 0.0472553963597053 | 0.7040693411814027 | 0.6641126411556777 |
| 0.4586267343996564 | 0.5687324164039201 | 0.4903206230628082 |
| 0.4348429213870842 | 0.0268460232397182 | 0.5021738013185324 |
| 0.1012561799433886 | 0.3553262840186074 | 0.3477486192911290 |
| 0.7989645906677398 | 0.7084937015808315 | 0.6765455573033992 |
| 0.1310804758830751 | 0.9119376970062986 | 0.3224362683628134 |
| 0.7944929062838400 | 0.2397665838208636 | 0.6673800519955648 |
| 0.7000896162433677 | 0.3023898773519543 | 0.5004416497607631 |
| 0.7042253229602291 | 0.8055851342369633 | 0.5028657543983027 |
| 0.2005943293881497 | 0.2988596757233207 | 0.4992147887662980 |
| 0.2012921512401844 | 0.8014585185513606 | 0.4990057977582830 |
| 0.8712132771004614 | 0.1301993194948828 | 0.3342172009792808 |
| 0.5217723131476816 | 0.4487652354088652 | 0.6638933557593465 |
| 0.3737535667029863 | 0.6428431273287596 | 0.3366246833948567 |
| 0.0318859328728243 | 0.9610755348331225 | 0.6656416939018897 |
| 0.3671857614888239 | 0.1335688442578714 | 0.3092323369039974 |
| 0.0312172789603878 | 0.4639028887082934 | 0.6860656501153910 |
| 0.8573614584866364 | 0.6300326829599571 | 0.3355027125182712 |
| 0.5440236911707699 | 0.9738247862471113 | 0.6635989832517190 |
| 0.5428150472729504 | 0.6251954038977948 | 0.7843657592075078 |
| 0.6374447355682654 | 0.7425688574328434 | 0.7794454045202478 |

### The perfect Ni<sub>11</sub> doped c-In<sub>2</sub>O<sub>3</sub>(111) surface

O In Ni In

|                     |                     |                     |  |
|---------------------|---------------------|---------------------|--|
| 1.000000000000000   |                     |                     |  |
| 14.4442996979000000 | 0.0000000000000000  | 0.0000000000000000  |  |
| -7.2221498489000000 | 12.5091304781999995 | 0.0000000000000000  |  |
| 0.0000000000000000  | 0.0000000000000000  | 17.9855003356999994 |  |

|    |    |    |    |
|----|----|----|----|
| O  | In | Ni | In |
| 72 | 41 | 1  | 6  |

Direct

|                    |                    |                    |
|--------------------|--------------------|--------------------|
| 0.8412123696573135 | 0.6128329367759331 | 0.4569779742656003 |
| 0.5150191787912732 | 0.9521890456180000 | 0.2897533045605028 |
| 0.1773464715786582 | 0.2842740691798327 | 0.6232106973948059 |
| 0.7927626193553109 | 0.9608033618575906 | 0.2977225907489726 |
| 0.4807819038149944 | 0.3065117579996947 | 0.6459976006362593 |
| 0.1328606180364544 | 0.6258530784446487 | 0.4698080818946268 |
| 0.3005643990339326 | 0.7318480872967034 | 0.3003601231035479 |
| 0.9774867149310102 | 0.0702842369019785 | 0.6373799405296177 |
| 0.6418991498429175 | 0.4058069720904932 | 0.4655611474743002 |
| 0.5287848306709850 | 0.2099930941458193 | 0.2704380817044187 |
| 0.1855200115228407 | 0.5413768601523491 | 0.6108039283503791 |
| 0.8562551524746447 | 0.8826864931453894 | 0.4418024215477971 |
| 0.8867276375092507 | 0.1282694823485332 | 0.4563931301746762 |
| 0.5474754033408956 | 0.4630033188367659 | 0.2898511724677459 |
| 0.2178601219317378 | 0.7922473577297379 | 0.6215520400406264 |
| 0.5387593915333847 | 0.7319147808984479 | 0.2978776066699876 |
| 0.2092525836458886 | 0.0815132780521565 | 0.6529215214847025 |
| 0.8750313185161599 | 0.4072277370453068 | 0.4691325255082570 |
| 0.7680940207254574 | 0.4687070310341081 | 0.2999447388188828 |
| 0.4283219142505320 | 0.8057796290571470 | 0.6361054960037879 |
| 0.0943808206268759 | 0.1358558357772748 | 0.4674542490103997 |
| 0.2900733305973558 | 0.2190354427950864 | 0.2709568062308103 |
| 0.9579115008717255 | 0.5426184632668454 | 0.6107408797692987 |
| 0.6173367968178287 | 0.8741781380689407 | 0.4415560603231492 |
| 0.3716471783200245 | 0.6586815560123030 | 0.4568229267063388 |
| 0.0368272467001942 | 0.9845575457665188 | 0.2902011808694174 |
| 0.7100936145477664 | 0.3277029657062646 | 0.6202645908408391 |
| 0.7676965139159483 | 0.7069651223840837 | 0.2980488938396949 |
| 0.4226493529842415 | 0.0310786650875894 | 0.6555793795036954 |
| 0.0921967853795361 | 0.3664714930855721 | 0.4698994342511141 |
| 0.0312543383086043 | 0.1988844676617398 | 0.3002956217936851 |
| 0.6828960098695880 | 0.5184771747547873 | 0.6374755187971015 |
| 0.3645421298565364 | 0.8595607198835237 | 0.4660502422996358 |
| 0.2807940914911412 | 0.9712282533400077 | 0.2709822288346733 |



|                    |                    |                    |
|--------------------|--------------------|--------------------|
| 0.9568326354655097 | 0.3144106567582121 | 0.6115680473206204 |
| 0.6256311614846860 | 0.6431709948498602 | 0.4417055110121473 |
| 0.2270318761319127 | 0.3177506690443985 | 0.3796345140310682 |
| 0.8796150806265693 | 0.6449684419717940 | 0.7060337557127939 |
| 0.5580668526966515 | 0.9867771735759361 | 0.5442488156648846 |
| 0.2672990063716408 | 0.9751453960820760 | 0.5311499947751389 |
| 0.9284650736661706 | 0.3059428124064776 | 0.3459220131432048 |
| 0.5944217228963010 | 0.6208363891328180 | 0.6953414257250858 |
| 0.7595700429251984 | 0.1945408656550517 | 0.5346218436107689 |
| 0.4229443952530111 | 0.5291991252691465 | 0.3649305372075708 |
| 0.0980550157281579 | 0.8681301631701051 | 0.7001883909595696 |
| 0.5432997689597875 | 0.7181461471000976 | 0.5583299359706597 |
| 0.2149016054836164 | 0.0596861153546320 | 0.3900278429979255 |
| 0.8709370349170277 | 0.3895963452275897 | 0.7293569461066568 |
| 0.1816857530929813 | 0.8093991362967830 | 0.3798350145357309 |
| 0.8531004840136067 | 0.1363136717485420 | 0.7110227454291543 |
| 0.5150917118082768 | 0.4726675164586316 | 0.5458437362196935 |
| 0.5261671995564993 | 0.1919417146335339 | 0.5309327770717863 |
| 0.1939358159750395 | 0.5222204794623397 | 0.3479259980062426 |
| 0.8565510560970432 | 0.8639100387110927 | 0.7017496539967922 |
| 0.3049851137464029 | 0.4650829298810190 | 0.5338029419855792 |
| 0.9702903003926791 | 0.7934321816424080 | 0.3646596690563402 |
| 0.6324095017650010 | 0.1312428471907202 | 0.6994066326674495 |
| 0.7815720142461484 | 0.7252054257948698 | 0.5585944467975408 |
| 0.4405508409660118 | 0.0560359466709185 | 0.3891573715305731 |
| 0.1132672214961436 | 0.3828679714883656 | 0.7292267626807447 |
| 0.6910629899217060 | 0.2724761395521083 | 0.3788874438530064 |
| 0.3607154219562321 | 0.6157218892919050 | 0.7124492588624183 |
| 0.0281054075357303 | 0.9413481217020044 | 0.5442526658917451 |
| 0.3086301110833822 | 0.2341555672092801 | 0.5296149065294249 |
| 0.9776984397144731 | 0.5718961760636374 | 0.3470121125658667 |
| 0.6299811907792228 | 0.8885350703093871 | 0.7022663085732850 |
| 0.0348536759872592 | 0.7405743441677614 | 0.5349473156677825 |
| 0.7062500575261087 | 0.0769438104369646 | 0.3640378395801316 |
| 0.3882463210622354 | 0.4143714717301472 | 0.6886015089015552 |
| 0.7739631184006889 | 0.9568054053183431 | 0.5591077564142269 |
| 0.4449290088164434 | 0.2850351009359080 | 0.3900709314572178 |
| 0.1168892242582988 | 0.6290112564237688 | 0.7291181163731165 |
| 0.1402832826360053 | 0.1457295279173924 | 0.3335946581623216 |
| 0.8091188923536246 | 0.4792953371877836 | 0.6741914065805782 |
| 0.5984093289755318 | 0.6233676446435222 | 0.3216253364279074 |
| 0.2550900466974783 | 0.9562089718456016 | 0.6529603225868147 |
| 0.9254490654641695 | 0.2900057776988298 | 0.4954867158720579 |
| 0.4696040651621593 | 0.8111157712101698 | 0.5134804749623223 |

|                    |                    |                    |
|--------------------|--------------------|--------------------|
| 0.3539858756731479 | 0.8944646059641308 | 0.3334321030445291 |
| 0.0208917998754070 | 0.2311737192556317 | 0.6757171846366937 |
| 0.8761510507055105 | 0.8751467184022031 | 0.3215162900411841 |
| 0.5469826317991713 | 0.2029465852149785 | 0.6520788706379380 |
| 0.2093532318927343 | 0.5352807879014554 | 0.4945805277876663 |
| 0.6879516247507892 | 0.5585907970337597 | 0.5140439863584817 |
| 0.6055131707673274 | 0.3598357588415811 | 0.3334028816698929 |
| 0.2680897261812059 | 0.6886037683013484 | 0.6749356090843760 |
| 0.6245321687382728 | 0.9010922982201370 | 0.3212804729296516 |
| 0.3067260430330797 | 0.2508980257475546 | 0.6506667577106309 |
| 0.9646145057620754 | 0.5743549886621568 | 0.4949511034441058 |
| 0.9405715806180865 | 0.0298657723759146 | 0.5137662214784707 |
| 0.9294720242215221 | 0.7888066625849310 | 0.4872628149715671 |
| 0.4769275993255603 | 0.3116936228265339 | 0.5067670579577496 |
| 0.1448502938910315 | 0.6458400106574529 | 0.3480498847853757 |
| 0.7997545091676864 | 0.9750249734403391 | 0.6795211263534555 |
| 0.5878172306534999 | 0.1185348408225064 | 0.3252875680836298 |
| 0.2647636787812265 | 0.4570443013842370 | 0.6652924286355357 |
| 0.7106905365942867 | 0.0408900481082378 | 0.4869839272285176 |
| 0.1908102292120949 | 0.0660525961290437 | 0.5063800815762182 |
| 0.8547537000716804 | 0.3993028753842411 | 0.3473782675689427 |
| 0.5204360360931717 | 0.7190539151035230 | 0.6778411319353811 |
| 0.3815834976779632 | 0.3692329293451866 | 0.3264643117213696 |
| 0.0438437750528147 | 0.7051764178687775 | 0.6655138721811376 |
| 0.4595539350005471 | 0.5698026625545761 | 0.4884235809719069 |
| 0.4349985655556085 | 0.0256226216795424 | 0.5050101265983850 |
| 0.1005551095325930 | 0.3547879944099397 | 0.3479895786430351 |
| 0.7669136361704276 | 0.6936345608381038 | 0.6780238571746696 |
| 0.1304813738754025 | 0.9122299624297014 | 0.3262751193801858 |
| 0.7953242596762515 | 0.2395028818018381 | 0.6672106756073668 |
| 0.7004368197862325 | 0.2997127893802153 | 0.4993454488885380 |
| 0.6998109802773212 | 0.8001011502235925 | 0.5000367259098859 |
| 0.2005582879843044 | 0.3002966180409993 | 0.5005116338088860 |
| 0.1999296822828343 | 0.8005204622888108 | 0.5006288805105910 |
| 0.8704040513566351 | 0.1276484851641735 | 0.3351093885519531 |
| 0.5337444271604568 | 0.4696195505156473 | 0.6587266085446927 |
| 0.3722659970577015 | 0.6426992712794064 | 0.3358327644605763 |
| 0.0261779247311682 | 0.9561347812936241 | 0.6653021441661592 |
| 0.3667094631331144 | 0.1336256810829571 | 0.3157372256039562 |
| 0.0338152365919187 | 0.4665665500566427 | 0.6847742716845980 |
| 0.8567602758302193 | 0.6292444350604677 | 0.3356144037290570 |
| 0.5421401719141310 | 0.969665559008147  | 0.6654585310161988 |

### The perfect Ni<sub>11</sub>-O<sub>V6</sub> surface

O In Ni

|                     |                     |                     |
|---------------------|---------------------|---------------------|
| 1.000000000000000   |                     |                     |
| 12.5091304782646002 | -7.2221498489373399 | 0.0000000000000000  |
| 0.0000000000000000  | 14.4442996978254001 | 0.0000000000000000  |
| 0.0000000000000000  | 0.0000000000000000  | 17.9855003356999994 |

|    |    |    |
|----|----|----|
| O  | In | Ni |
| 71 | 47 | 1  |

Direct

|                    |                    |                    |
|--------------------|--------------------|--------------------|
| 0.8398520697606283 | 0.6123427472403568 | 0.4573119489842810 |
| 0.5148782877433682 | 0.9518008952479304 | 0.2880470790892501 |
| 0.1703784760316667 | 0.2795498989924403 | 0.6192340843377896 |
| 0.7914262188720657 | 0.9605082517899296 | 0.2974282915592346 |
| 0.4686084034862673 | 0.2917414566199615 | 0.6434583465271159 |
| 0.1333150316931558 | 0.6253441811780526 | 0.4692634581354823 |
| 0.3000428171242679 | 0.7300548661377519 | 0.2996435973679180 |
| 0.9749880597796475 | 0.0686999845188678 | 0.6358514842788255 |
| 0.6406188830955902 | 0.4054102156893046 | 0.4666326077396402 |
| 0.5286725869267836 | 0.2097539907869205 | 0.2683556057624557 |
| 0.1863626757604672 | 0.5400675302211444 | 0.6106511784501008 |
| 0.8559803174791160 | 0.8828351910677005 | 0.4407434245522006 |
| 0.8851273248650430 | 0.1286078905432721 | 0.4560976091323863 |
| 0.5466656874025126 | 0.4623186218328557 | 0.2900558180449717 |
| 0.2180500319142078 | 0.7906449067515440 | 0.6195195971954758 |
| 0.5380242095279385 | 0.7308625765173592 | 0.2985553219833229 |
| 0.2053498000636081 | 0.0766369047038823 | 0.6544718324258111 |
| 0.8743717518615182 | 0.4060196746431404 | 0.4682008620764508 |
| 0.7670396563021653 | 0.4680271200535656 | 0.2994220221761887 |
| 0.4253662147173489 | 0.8086892131988495 | 0.6329996505382063 |
| 0.0923463272488728 | 0.1333455131563803 | 0.4631969233557408 |
| 0.2895241156819776 | 0.2186859766048380 | 0.2690494635741865 |
| 0.9576618466651617 | 0.5420810114638878 | 0.6100404861624549 |
| 0.6160757772068238 | 0.8725037590888998 | 0.4417735961910835 |
| 0.3735468062980952 | 0.6579157077047701 | 0.4580827414958260 |
| 0.0356051127496402 | 0.9830634473555807 | 0.2878832454314667 |
| 0.7073293070153089 | 0.3327871546261660 | 0.6201656528715173 |
| 0.7663994145742959 | 0.7062794371613133 | 0.2986639566160982 |
| 0.4214319695875454 | 0.0297492849511693 | 0.6570747168322361 |
| 0.0906812166240465 | 0.3652332430278312 | 0.4685320010393807 |
| 0.0296980422400612 | 0.1977394996408725 | 0.2988872825431718 |
| 0.6821277678062742 | 0.5348169128665626 | 0.6469479670407225 |
| 0.3640400508722048 | 0.8593318665175417 | 0.4630241521465748 |
| 0.2796489300261749 | 0.9697979924132628 | 0.2674646950397884 |
| 0.9565857789755869 | 0.3156251789045941 | 0.6116674882942221 |

|                    |                    |                    |
|--------------------|--------------------|--------------------|
| 0.6252071967771116 | 0.6432788701630977 | 0.4434370376697652 |
| 0.2258520948585197 | 0.3168768920801843 | 0.3777499747661306 |
| 0.8892967445073291 | 0.6444990532540233 | 0.7115884870775719 |
| 0.5568628579015952 | 0.9867026028940354 | 0.5427392271908200 |
| 0.2673569440328499 | 0.9747929182327799 | 0.5301267320871381 |
| 0.9272671776277845 | 0.3052740576590132 | 0.3428082265194130 |
| 0.7588692973424521 | 0.1952816110977501 | 0.5365763484843298 |
| 0.4227128044866518 | 0.5280179846203384 | 0.3660432114652977 |
| 0.0970065591097478 | 0.8656046168775543 | 0.6983197984642374 |
| 0.5462820535547064 | 0.7156154042289675 | 0.5630166290221057 |
| 0.2144465435259730 | 0.0579680382818767 | 0.3865715952305098 |
| 0.8707184785257891 | 0.3896370843356431 | 0.7295357780014009 |
| 0.1809039294433241 | 0.8085709224827370 | 0.3775397423490540 |
| 0.8525313002899357 | 0.1373317347011578 | 0.7105085282340659 |
| 0.5142899205592015 | 0.4692406654877788 | 0.5450605190427501 |
| 0.5268858221203969 | 0.1899024996915579 | 0.5293925441729972 |
| 0.1939953320797518 | 0.5215335983332768 | 0.3490722443939851 |
| 0.8588137663646623 | 0.8662644986194609 | 0.7030940726050111 |
| 0.3035928866208923 | 0.4625121187152262 | 0.5336348540564353 |
| 0.9698324866603282 | 0.7927821751146306 | 0.3634063905464053 |
| 0.6330770240732291 | 0.1349148696562518 | 0.6993581530461981 |
| 0.7857346174640631 | 0.7279432530152984 | 0.5582226203291887 |
| 0.4386596215389558 | 0.0550580842167327 | 0.3858837279392026 |
| 0.1131328192266862 | 0.3817082823011380 | 0.7288372476125551 |
| 0.6895726105589266 | 0.2717390287799670 | 0.3784437760191089 |
| 0.3640503158111494 | 0.6165595129138142 | 0.7115738826889233 |
| 0.0284331705237728 | 0.9415832996691001 | 0.5428080376124688 |
| 0.3046159573621869 | 0.2304174339905540 | 0.5281762344552484 |
| 0.9765910449616232 | 0.5709688061030231 | 0.3479814411559081 |
| 0.6298930556585579 | 0.8953891694927661 | 0.7030800225635710 |
| 0.0350713613211448 | 0.7399138945886379 | 0.5335951963844725 |
| 0.7044044554227245 | 0.0759727280536838 | 0.3646261082162888 |
| 0.3764643881781332 | 0.4026783661196969 | 0.6924193596252500 |
| 0.7725395681102661 | 0.9563284402738085 | 0.5585437952861734 |
| 0.4437630414697012 | 0.2828198062646300 | 0.3887155069654624 |
| 0.1183199755346332 | 0.6275049948984833 | 0.7293154204790732 |
| 0.1389820683647553 | 0.1445836025930372 | 0.3309001023761542 |
| 0.8096724584128328 | 0.4806073883643614 | 0.6754741843140675 |
| 0.5976559707158059 | 0.6224346993921358 | 0.3226825142167019 |
| 0.2545284890109666 | 0.9543453038056426 | 0.6520649360248767 |
| 0.9249080205698641 | 0.2899628920040928 | 0.4959146658722427 |
| 0.4692493825583782 | 0.8118158808268376 | 0.5103238957819467 |
| 0.3529602475446174 | 0.8934282459982397 | 0.3298502357646692 |
| 0.0192260487494704 | 0.2304311700895289 | 0.6749941359832866 |

|                    |                    |                    |
|--------------------|--------------------|--------------------|
| 0.8752058601000982 | 0.8749259053019520 | 0.3202493238983428 |
| 0.5451000212656784 | 0.2018127799666310 | 0.6513684017140687 |
| 0.2088152332162014 | 0.5335641145822945 | 0.4936950414212700 |
| 0.6869658584228127 | 0.5580747742589602 | 0.5157953140253018 |
| 0.6044479950766272 | 0.3587444255060954 | 0.3323037685358557 |
| 0.2664731376334607 | 0.6867477209376325 | 0.6734499610737007 |
| 0.6233550009071686 | 0.9001521650547188 | 0.3207414512771668 |
| 0.2972430950651959 | 0.2438152956865448 | 0.6503890935165687 |
| 0.9641554419731402 | 0.5734580060886647 | 0.4937006057298847 |
| 0.9401693020477949 | 0.0299464925095733 | 0.5120568730262306 |
| 0.9315246786613695 | 0.7896253379164309 | 0.4848378486010401 |
| 0.4736514776217066 | 0.3069707089023700 | 0.5054455583969739 |
| 0.1440006205032796 | 0.6445299173265640 | 0.3472789549373597 |
| 0.8006199700557396 | 0.9774571181733869 | 0.6778577636314413 |
| 0.5872641110592804 | 0.1182337222101304 | 0.3237174704911290 |
| 0.2627163351506118 | 0.4528088737601206 | 0.6644615309944814 |
| 0.7099976365420618 | 0.0418730063528577 | 0.4867088622064949 |
| 0.1893685570504835 | 0.0637848988243219 | 0.5020750590719830 |
| 0.8534329894397352 | 0.3981416918215077 | 0.3462902303829323 |
| 0.5140141433154202 | 0.7350241647300709 | 0.6757351547341588 |
| 0.3806912615648868 | 0.3681629505157798 | 0.3258355851853307 |
| 0.0479609432206222 | 0.7042057075063904 | 0.6641415576411523 |
| 0.4585524190167130 | 0.5669216825950872 | 0.4890899618272435 |
| 0.4340408520241774 | 0.0252626642765839 | 0.5012565636027696 |
| 0.0990582831592264 | 0.3537525214580585 | 0.3465781482831044 |
| 0.7926683991200056 | 0.7035727607167248 | 0.6749135082241623 |
| 0.1294988347716703 | 0.9107108263196385 | 0.3230543021323257 |
| 0.7951166682816698 | 0.2412808343406861 | 0.6669632034594789 |
| 0.7002387262147096 | 0.3004742701988768 | 0.4991074228670946 |
| 0.7005409336429687 | 0.8004570941190375 | 0.4995480549593648 |
| 0.1981337547802409 | 0.2978177785305610 | 0.4982511495503529 |
| 0.1996925397518669 | 0.8000595352968249 | 0.4982948832631606 |
| 0.8690474713604910 | 0.1276308913143455 | 0.3341991214465639 |
| 0.3718705273655809 | 0.6413231403522247 | 0.3361149406957102 |
| 0.0302358220005597 | 0.9594802965543592 | 0.6640333793923772 |
| 0.3658655919082639 | 0.1326125322295871 | 0.3122509864977597 |
| 0.0333978564863537 | 0.4652945164441780 | 0.6852112720651684 |
| 0.8552330120559226 | 0.6280909978437925 | 0.3356084790866546 |
| 0.5404684020005159 | 0.9749529519875608 | 0.6637845412173092 |
| 0.5189654941828666 | 0.4482253902689715 | 0.6546499313494268 |

### The perfect Ni<sub>11</sub>-O<sub>V6</sub>-bt-CO<sub>2</sub> surface

O In Ni C

1.0000000000000000

12.5091304782646002 -7.2221498489373399 0.0000000000000000

0.0000000000000000 14.4442996978254001 0.0000000000000000

0.0000000000000000 0.0000000000000000 17.9855003356999994

O In Ni C

73 47 1 1

Selective dynamics

Direct

|                    |                    |                    |   |   |   |
|--------------------|--------------------|--------------------|---|---|---|
| 0.8390161750870864 | 0.6123903495689423 | 0.4579124210713761 | T | T | T |
| 0.5149724321977137 | 0.9517980450270604 | 0.2880887686110786 | T | T | T |
| 0.1715128072381343 | 0.2803618221963088 | 0.6193418988244879 | T | T | T |
| 0.7918363937374594 | 0.9604135604227603 | 0.2974567907896352 | T | T | T |
| 0.4690297877077537 | 0.2896134198200617 | 0.6398548976134301 | T | T | T |
| 0.1325179882841848 | 0.6249843217748092 | 0.4690529673127783 | T | T | T |
| 0.3000816603527013 | 0.7299387590565041 | 0.2997053267508524 | T | T | T |
| 0.9762537211297805 | 0.0708695951501895 | 0.6344892198352154 | T | T | T |
| 0.6402185191233107 | 0.4055057497591080 | 0.4674337842107649 | T | T | T |
| 0.5284405296332186 | 0.2102968042376712 | 0.2696483823151120 | T | T | T |
| 0.1850248181794444 | 0.5397897078019396 | 0.6099866108344922 | T | T | T |
| 0.8553207423300083 | 0.8816832537997219 | 0.4408389611945238 | T | T | T |
| 0.8854480397235224 | 0.1282852784559300 | 0.4555162631003350 | T | T | T |
| 0.5467501547687997 | 0.4623006618286953 | 0.2908355126407070 | T | T | T |
| 0.2172060019373041 | 0.7899597400661797 | 0.6194197670875429 | T | T | T |
| 0.5381916325249039 | 0.7309121797993453 | 0.2985529281658647 | T | T | T |
| 0.2053907183029861 | 0.0768004161835506 | 0.6524771087173659 | T | T | T |
| 0.8743842687167684 | 0.4063761259908750 | 0.4682474929588586 | T | T | T |
| 0.7666438434212711 | 0.4682143978032011 | 0.3003244607499680 | T | T | T |
| 0.4259068706995536 | 0.8085089590091717 | 0.6340972870906231 | T | T | T |
| 0.0921147956742600 | 0.1330768505984293 | 0.4628226538532155 | T | T | T |
| 0.2899027051813299 | 0.2188365253482235 | 0.2701014382024063 | T | T | T |
| 0.9569940558396568 | 0.5426205402272475 | 0.6103182480744899 | T | T | T |
| 0.6166593844007425 | 0.8733578397726747 | 0.4408757117859369 | T | T | T |
| 0.3725511050094036 | 0.6578343189586149 | 0.4577133633457862 | T | T | T |
| 0.0354498358576473 | 0.9829848425020529 | 0.2883141668404274 | T | T | T |
| 0.7085251998941597 | 0.3294980347695309 | 0.6198462197466476 | T | T | T |
| 0.7662325692690192 | 0.7062026942193064 | 0.2987007091219822 | T | T | T |
| 0.4210398785345240 | 0.0278587552670671 | 0.6555181793874235 | T | T | T |
| 0.0900743407888128 | 0.3649298541726029 | 0.4683278065013706 | T | T | T |
| 0.0297286025817515 | 0.1978255482965159 | 0.2987168541525033 | T | T | T |
| 0.6862803744159083 | 0.5277930701820048 | 0.6434654851352893 | T | T | T |
| 0.3638717764588131 | 0.8586621986118880 | 0.4635546291269576 | T | T | T |
| 0.2795263376460646 | 0.9698231364450887 | 0.2678567000767545 | T | T | T |

|                    |                    |                    |   |   |   |
|--------------------|--------------------|--------------------|---|---|---|
| 0.9559729690579795 | 0.3157891984916967 | 0.6113139886108315 | T | T | T |
| 0.6253356928700802 | 0.6431632195684069 | 0.4433881340543032 | T | T | T |
| 0.2254302196380086 | 0.3171543883414044 | 0.3776892044450170 | T | T | T |
| 0.8875993219940986 | 0.6460096854654084 | 0.7111457681017347 | T | T | T |
| 0.5571510972349960 | 0.9861186371537027 | 0.5423918915492310 | T | T | T |
| 0.2668207578939710 | 0.9742019898171610 | 0.5295577805494694 | T | T | T |
| 0.9273539115875775 | 0.3055739081342894 | 0.3428509614364796 | T | T | T |
| 0.7591004640313843 | 0.1943184796323354 | 0.5352404960644509 | T | T | T |
| 0.4226510400354895 | 0.5282818387148287 | 0.3662849295548811 | T | T | T |
| 0.0975403665046493 | 0.8665893571850820 | 0.6981177583035266 | T | T | T |
| 0.5447111938566094 | 0.7184061895704806 | 0.5608154459252663 | T | T | T |
| 0.2141663991656071 | 0.0575587887442591 | 0.3869006435323585 | T | T | T |
| 0.8706083870109238 | 0.3902346165428409 | 0.7294188244355824 | T | T | T |
| 0.1810431209092070 | 0.8083714238484666 | 0.3775971360420238 | T | T | T |
| 0.8530572498735044 | 0.1378442062137500 | 0.7102148037930703 | T | T | T |
| 0.5145001811031806 | 0.4730354180884370 | 0.5486809985798118 | T | T | T |
| 0.5275177969602307 | 0.1888869592565226 | 0.5278611359134022 | T | T | T |
| 0.1936482842131293 | 0.5214654971261595 | 0.3487094820489461 | T | T | T |
| 0.8623637454522309 | 0.8696726392634611 | 0.7018410247613214 | T | T | T |
| 0.3028909759334362 | 0.4626342415509582 | 0.5329980620463517 | T | T | T |
| 0.9695932111781497 | 0.7925027260606510 | 0.3636914227808251 | T | T | T |
| 0.6322013964539780 | 0.1333745943425933 | 0.6991185967948542 | T | T | T |
| 0.7831909287082125 | 0.7272123202567943 | 0.5594647629733093 | T | T | T |
| 0.4384244989982761 | 0.0541148107907525 | 0.3859557317641090 | T | T | T |
| 0.1132658276584718 | 0.3823483756965952 | 0.7282900151944375 | T | T | T |
| 0.6900398038556873 | 0.2720367647629729 | 0.3785447406771451 | T | T | T |
| 0.3639780296855830 | 0.6162400904014451 | 0.7093392618755415 | T | T | T |
| 0.0278835979275190 | 0.9412417765868412 | 0.5424195413344870 | T | T | T |
| 0.3039599807813709 | 0.2309521639412983 | 0.5268900027297891 | T | T | T |
| 0.9765134169558024 | 0.5712021832532909 | 0.3476575749988014 | T | T | T |
| 0.6310302534123230 | 0.8966661178541659 | 0.7010793458195890 | T | T | T |
| 0.0346854959557893 | 0.7400492499384115 | 0.5333952963690067 | T | T | T |
| 0.7049418776476118 | 0.0764746019417324 | 0.3636911498546665 | T | T | T |
| 0.3764588817198995 | 0.4016993216437257 | 0.6907058228058474 | T | T | T |
| 0.7730470750283868 | 0.9563028555954886 | 0.5580207968185048 | T | T | T |
| 0.4438513894186814 | 0.2835967916897953 | 0.3907425620752060 | T | T | T |
| 0.1183708073420035 | 0.6279935526100516 | 0.7289670253561997 | T | T | T |
| 0.6192312175474664 | 0.6655952886178701 | 0.7205121149927883 | T | T | T |
| 0.5622834780242890 | 0.5201265218703673 | 0.7966295959141980 | T | T | T |
| 0.1389676687184425 | 0.1445864122226543 | 0.3314024601197039 | T | T | T |
| 0.8084166498319140 | 0.4801540044605577 | 0.6752154169877328 | T | T | T |
| 0.5975218018417986 | 0.6223154562755266 | 0.3231349933692629 | T | T | T |
| 0.2543087908590806 | 0.9538175179355715 | 0.6514273147928381 | T | T | T |
| 0.9244843977197980 | 0.2896651696063423 | 0.4956299442038355 | T | T | T |

|                    |                    |                    |   |   |   |
|--------------------|--------------------|--------------------|---|---|---|
| 0.4694030597044246 | 0.8113111844507417 | 0.5110575934908334 | T | T | T |
| 0.3529584453334701 | 0.8932596976893614 | 0.3300478089056231 | T | T | T |
| 0.0196639274993469 | 0.2313852111797612 | 0.6743280600314693 | T | T | T |
| 0.8751714678403355 | 0.8744896960011334 | 0.3205315256329387 | T | T | T |
| 0.5445727075329536 | 0.1999618377845212 | 0.6499745982867590 | T | T | T |
| 0.2084022420620567 | 0.5335312598970958 | 0.4934886077867428 | T | T | T |
| 0.6858412887139381 | 0.5573926803522951 | 0.5175268935893481 | T | T | T |
| 0.6041450654996164 | 0.3589977123743115 | 0.3344492338235540 | T | T | T |
| 0.2670506668808776 | 0.6863495157964911 | 0.6731341049159763 | T | T | T |
| 0.6236711889388961 | 0.9003160317287003 | 0.3204269664429025 | T | T | T |
| 0.2994185346765873 | 0.2440898270922204 | 0.6486825836786543 | T | T | T |
| 0.9636277930384918 | 0.5736001264470283 | 0.4941805411266417 | T | T | T |
| 0.9400239819013956 | 0.0296230158065278 | 0.5117568456013856 | T | T | T |
| 0.9297812916412743 | 0.7886504009166112 | 0.4857570701919922 | T | T | T |
| 0.4746501867876229 | 0.3091671195606882 | 0.5084695467361637 | T | T | T |
| 0.1439384934055953 | 0.6445332513653993 | 0.3473676619052482 | T | T | T |
| 0.8013208728071494 | 0.9779865928061375 | 0.6775322901047478 | T | T | T |
| 0.5872232220995527 | 0.1183648900778692 | 0.3239624775928554 | T | T | T |
| 0.2635002998753211 | 0.4535944230198924 | 0.6638437721714692 | T | T | T |
| 0.7100689456516137 | 0.0412322450261486 | 0.4861936525219969 | T | T | T |
| 0.1893286360670394 | 0.0638482596497393 | 0.5024593535492562 | T | T | T |
| 0.8535559519396178 | 0.3985379084293219 | 0.3465755871509579 | T | T | T |
| 0.5176916456182520 | 0.7334542353369848 | 0.6761557689536770 | T | T | T |
| 0.3810050863791231 | 0.3682623138817439 | 0.3270661708947529 | T | T | T |
| 0.0466377418046490 | 0.7044703962584329 | 0.6647427140936432 | T | T | T |
| 0.4589123579967720 | 0.5676654795195424 | 0.4901506090373737 | T | T | T |
| 0.4339033121019489 | 0.0244755210503092 | 0.5015706302136774 | T | T | T |
| 0.0989136080667375 | 0.3538002037155324 | 0.3465422185386012 | T | T | T |
| 0.7884336271631772 | 0.7040776592012689 | 0.6766366281037549 | T | T | T |
| 0.1293426063458059 | 0.9104796894000814 | 0.3235017180583006 | T | T | T |
| 0.7945776806286130 | 0.2411934784229532 | 0.6668934045070518 | T | T | T |
| 0.6998150364432509 | 0.2996046643738524 | 0.4991016777944716 | T | T | T |
| 0.6995305741110628 | 0.8000601298399939 | 0.4993907191463888 | T | T | T |
| 0.1977841959855510 | 0.2977815800272360 | 0.4982100348023693 | T | T | T |
| 0.1993455962288345 | 0.7995724380931782 | 0.4984810584625400 | T | T | T |
| 0.8692655281032230 | 0.1276817522277415 | 0.3340185868468798 | T | T | T |
| 0.3720096634473116 | 0.6414156269757963 | 0.3363846103228927 | T | T | T |
| 0.0300440726588670 | 0.9599980023876221 | 0.6635351418793465 | T | T | T |
| 0.3658665642966584 | 0.1326476388605406 | 0.3136512188541009 | T | T | T |
| 0.0331952072782412 | 0.4658701858374837 | 0.6847999150767650 | T | T | T |
| 0.8548170158323051 | 0.6281330780072339 | 0.3362255672994355 | T | T | T |
| 0.5410235295100712 | 0.9735362246516569 | 0.6635522278378088 | T | T | T |
| 0.5247201919573232 | 0.4550809830597815 | 0.6638779308656353 | T | T | T |
| 0.5709136222332652 | 0.5628353587607250 | 0.7370436106726301 | T | T | T |



**The perfect Ni<sub>11</sub>-O<sub>V6</sub>-[CO<sub>2</sub>+H]\* surface**

O In Ni C H

1.0000000000000000  
12.5091304782646002 -7.2221498489373399 0.0000000000000000  
0.0000000000000000 14.4442996978254001 0.0000000000000000  
0.0000000000000000 0.0000000000000000 17.9855003356999994

O In Ni C H  
73 47 1 1 1

Direct

0.8392794958290841 0.6126838986705962 0.4583422127389687  
0.5151214435299188 0.9518081412620679 0.2869941258291001  
0.1722249632906055 0.2810544842860815 0.6194612987210437  
0.7916852237483916 0.9604156419182955 0.2972645056638126  
0.4694758800964899 0.2917337648008497 0.6395341556814123  
0.1324677473228412 0.6252278831359414 0.4691613996447623  
0.2994896137425863 0.7294732468471351 0.2989499133122608  
0.9796436243335224 0.0732410496868039 0.6321939239749611  
0.6400351353325913 0.4053470681066669 0.4677785638694837  
0.5286897555117536 0.2105342107918490 0.2683107599667258  
0.1848495872011194 0.5400972984704624 0.6100307763908391  
0.8553889808274520 0.8824373587288638 0.4410027801254470  
0.8841953453608046 0.1269382547559864 0.4556887169136596  
0.5467010555864282 0.4623062458069592 0.2901497986998573  
0.2203451308655522 0.7912078956394336 0.6196568555286985  
0.5381584524168110 0.7309013012074049 0.2985071200039219  
0.2058363524860348 0.0774952541720694 0.6546528039328798  
0.8736133800799055 0.4056801016393289 0.4685324881314593  
0.7665133887629058 0.4680381351640500 0.3003345394666614  
0.4314891720830432 0.8094289056455338 0.6384491350235950  
0.0929673892614272 0.1335299733871788 0.4616732414392314  
0.2898885932042279 0.2191133868539959 0.2688407022015600  
0.9561136939238147 0.5416297407417470 0.6105192925986273  
0.6172023969875690 0.8738297738741181 0.4411030921055608  
0.3731651244767599 0.6579241666795782 0.4575987983381688  
0.0353775916097251 0.9828221832145474 0.2877787318117093  
0.7078225318505968 0.3284996498895790 0.6203508364472419  
0.7665539823838319 0.7063655837946782 0.2986868791039568  
0.4187750098589014 0.0319294350251805 0.6601283252680122  
0.0901101584806126 0.3644102292073278 0.4685004261587148  
0.0296496713480949 0.1979767299716587 0.2984133612870662  
0.6858791510577493 0.5277635517249142 0.6436343588127504  
0.3641116212755685 0.8588965869257210 0.4636154159598287  
0.2788150618830854 0.9694330216875319 0.2662430846618470

|                    |                    |                    |
|--------------------|--------------------|--------------------|
| 0.9553347440453764 | 0.3146893735076803 | 0.6112974479159569 |
| 0.6253702393306715 | 0.6434726855014247 | 0.4432379852983880 |
| 0.2258768553956578 | 0.3173086637466379 | 0.3772614998255696 |
| 0.8872577304043425 | 0.6454792494855695 | 0.7116257712065281 |
| 0.5553044363132952 | 0.9855717273805372 | 0.5426421176580004 |
| 0.2671687523054005 | 0.9745966911028506 | 0.5296616805627226 |
| 0.9270028964349953 | 0.3050472174249479 | 0.3440053632392603 |
| 0.7586324878818902 | 0.1938849228316860 | 0.5357762765237627 |
| 0.4226664830942046 | 0.5281107028145335 | 0.3658051974798183 |
| 0.0972932902580650 | 0.8654630054385395 | 0.6980739522001144 |
| 0.5450354724781230 | 0.7193137317879889 | 0.5611335133275293 |
| 0.2148979868406810 | 0.0577905032089562 | 0.3855921646744092 |
| 0.8693864360149030 | 0.3885266663750273 | 0.7294490931909237 |
| 0.1815843887215857 | 0.8088680683014832 | 0.3773570866858776 |
| 0.8534651791409322 | 0.1369137679541583 | 0.7114564641559320 |
| 0.5145037307358097 | 0.4737509598285611 | 0.5486079292707723 |
| 0.5266621274280134 | 0.1882122946356613 | 0.5283384886358127 |
| 0.1937169887786353 | 0.5216205364446529 | 0.3495594470154901 |
| 0.8651665996151909 | 0.8710387595797640 | 0.7025533168213473 |
| 0.3028565916991894 | 0.4629595443672020 | 0.5331719021433839 |
| 0.9697365560022029 | 0.7928944784550435 | 0.3642825669159187 |
| 0.6315419468997876 | 0.1309826035789631 | 0.6989715302512856 |
| 0.7836239816557399 | 0.7280045172045214 | 0.5597125050444222 |
| 0.4378008613574420 | 0.0538435995556551 | 0.3836302368854440 |
| 0.1126488112341056 | 0.3826984290149663 | 0.7287107010850793 |
| 0.6891916413654289 | 0.2715072947853417 | 0.3784549627736560 |
| 0.3591793707465996 | 0.6135636373710102 | 0.7120099835472860 |
| 0.0290020126476858 | 0.9418494200580406 | 0.5419339706541091 |
| 0.3038381851627083 | 0.2305887021473113 | 0.5270804015452766 |
| 0.9761058157404177 | 0.5710402292595904 | 0.3483598509404682 |
| 0.6333579158940976 | 0.8930569264200320 | 0.7127016373712234 |
| 0.0352588032920397 | 0.7398459978502815 | 0.5345402528103467 |
| 0.7042929528244156 | 0.0762410456168919 | 0.3637653303943120 |
| 0.3767208455394507 | 0.4026522933680124 | 0.6910545616978597 |
| 0.7699239796313759 | 0.9549169042126451 | 0.5600822684799024 |
| 0.4438881230810862 | 0.2833857841279643 | 0.3900958810683512 |
| 0.1166883482767620 | 0.6276248540066832 | 0.7292567446124009 |
| 0.6190740220816110 | 0.6668844209648279 | 0.7213604343366498 |
| 0.5653431317119885 | 0.5227836175350282 | 0.7980313694429025 |
| 0.1391131696667972 | 0.1447488499052411 | 0.3302061836117930 |
| 0.8078209638653856 | 0.4795916666298528 | 0.6757856610495383 |
| 0.5977624676766655 | 0.6223522551931597 | 0.3224640028934807 |
| 0.2531414139783180 | 0.9539597873972482 | 0.6515847173456093 |
| 0.9243726250101989 | 0.2894210052331470 | 0.4950743489579936 |

|                    |                    |                    |
|--------------------|--------------------|--------------------|
| 0.4698383282752442 | 0.8115502670398986 | 0.5097463341071397 |
| 0.3525106726349256 | 0.8929791858869158 | 0.3275242191262673 |
| 0.0209396837790726 | 0.2328167638570435 | 0.6743766982245428 |
| 0.8752068607959704 | 0.8746072678394622 | 0.3201040178313432 |
| 0.5448767053600283 | 0.2022378130392349 | 0.6504875697895310 |
| 0.2081186200986675 | 0.5334778237396756 | 0.4931566589587610 |
| 0.6859299530353680 | 0.5574452352825762 | 0.5175030793028313 |
| 0.6039182707896643 | 0.3588067654830596 | 0.3334997764300406 |
| 0.2653070058291429 | 0.6858536617607459 | 0.6741656154214216 |
| 0.6235805512594872 | 0.9002442332334420 | 0.3198925804239618 |
| 0.2997929499532491 | 0.2445324004889830 | 0.6489318561406050 |
| 0.9633814084499933 | 0.5730857095129860 | 0.4941845576197963 |
| 0.9409778837870899 | 0.0298967776629706 | 0.5098202593466566 |
| 0.9305931396994161 | 0.7887139445099838 | 0.4858582756605470 |
| 0.4744814448587236 | 0.3096783479191128 | 0.5078861813298666 |
| 0.1435917518538947 | 0.6445316325168208 | 0.3471721573320864 |
| 0.8129863417473993 | 0.9829712154172768 | 0.6750498593898515 |
| 0.5875462302941815 | 0.1185839658909152 | 0.3224928957559794 |
| 0.2617831296348720 | 0.4523013189887663 | 0.6635978925582134 |
| 0.7094515055027553 | 0.0414684923756551 | 0.4859847128035729 |
| 0.1899901421119695 | 0.0641498646273058 | 0.5007594387470706 |
| 0.8531363064141080 | 0.3981908480998910 | 0.3465656472460001 |
| 0.5112242898313545 | 0.7214572429495302 | 0.6745641532751211 |
| 0.3810396801028619 | 0.3681716095791403 | 0.3261982146433292 |
| 0.0459824696726690 | 0.7039845382416223 | 0.6643679812604616 |
| 0.4583118477540734 | 0.5664355895131795 | 0.4885893234673674 |
| 0.4329197733080760 | 0.0254903326146786 | 0.4983350833894996 |
| 0.0990759568610048 | 0.3538086124007322 | 0.3463603488592413 |
| 0.7891367062879076 | 0.7042103723880466 | 0.6765667835725289 |
| 0.1291450399740696 | 0.9101891367854982 | 0.3227464288340084 |
| 0.7942028924926776 | 0.2403047814124128 | 0.6659835706174559 |
| 0.6993030587711934 | 0.2992607212225714 | 0.4988719591620643 |
| 0.7000801826537877 | 0.7999475628467325 | 0.4987893591442616 |
| 0.1982445569879104 | 0.2979996394712405 | 0.4977395999941190 |
| 0.1994988507306048 | 0.7993886034866121 | 0.4982944846672681 |
| 0.8689305640925952 | 0.1275421111233812 | 0.3335363535337713 |
| 0.3717645801830282 | 0.6412181919673765 | 0.3357299735437375 |
| 0.0326443729665250 | 0.9609010127757822 | 0.6630316607318660 |
| 0.3657195340957606 | 0.1327075915209172 | 0.3115062670370905 |
| 0.0320304073326845 | 0.4655018187524227 | 0.6849951900788821 |
| 0.8548616092975974 | 0.6281455048416663 | 0.3362884792185096 |
| 0.5315017901379607 | 0.9751938030155263 | 0.6615936924848245 |
| 0.5246763668488511 | 0.4556264875250917 | 0.6642841355797985 |
| 0.5712599129897800 | 0.5626770127165893 | 0.7377798964336795 |

0.6360767554959385 0.9000025170164536 0.7666081771165068

### The perfect Ni<sub>11</sub>-O<sub>V6</sub>-[CO+OH]\* surface

O In Ni C H

|                     |                     |                     |  |  |
|---------------------|---------------------|---------------------|--|--|
| 1.000000000000000   |                     |                     |  |  |
| 12.5091304782646002 | -7.2221498489373399 | 0.000000000000000   |  |  |
| 0.000000000000000   | 14.4442996978254001 | 0.000000000000000   |  |  |
| 0.000000000000000   | 0.000000000000000   | 17.9855003356999994 |  |  |

|    |    |    |   |   |
|----|----|----|---|---|
| O  | In | Ni | C | H |
| 73 | 47 | 1  | 1 | 1 |

Direct

|                    |                    |                    |
|--------------------|--------------------|--------------------|
| 0.8393055849270264 | 0.6128362269445918 | 0.4574642069539501 |
| 0.5148206762553641 | 0.9512966537561200 | 0.2878554499081374 |
| 0.1726220225462194 | 0.2819814508179204 | 0.6192461424418203 |
| 0.7910738281003111 | 0.9601690949241836 | 0.2972888062583056 |
| 0.4628470986216587 | 0.2794337734072422 | 0.6390014666033834 |
| 0.1320520634684815 | 0.6252086009626834 | 0.4681296603053371 |
| 0.3000285380580222 | 0.7292279226508508 | 0.2993677757672950 |
| 0.9773357560325251 | 0.0742912403157114 | 0.6321883266304508 |
| 0.6391151672261483 | 0.4050953507862341 | 0.4674960686103687 |
| 0.5281292643393665 | 0.2100020109194883 | 0.2697641474577320 |
| 0.1851443840573882 | 0.5415503466411803 | 0.6084544775118410 |
| 0.8552784137987435 | 0.8821203275893816 | 0.4404120886771349 |
| 0.8849783738432024 | 0.1290488838046111 | 0.4551762516543514 |
| 0.5459219323070802 | 0.4613483915203826 | 0.2913859278793625 |
| 0.2178184966771249 | 0.7904486533215405 | 0.6184628623370332 |
| 0.5379375686832915 | 0.7301430971305889 | 0.2988890790210193 |
| 0.2050966150842929 | 0.0770365852923098 | 0.6554251075617874 |
| 0.8745715351762570 | 0.4067178919168865 | 0.4676259812036062 |
| 0.7657438535186464 | 0.4680803619609495 | 0.3005269081198481 |
| 0.4284015279302197 | 0.8072457183605638 | 0.6343382317381393 |
| 0.0915009444581448 | 0.1328700644349587 | 0.4611523805090469 |
| 0.2898057059838660 | 0.2186461321486333 | 0.2699086050916742 |
| 0.9564896529168758 | 0.5436760956254212 | 0.6096310205917461 |
| 0.6163131675988521 | 0.8722306896845872 | 0.4414361706779633 |
| 0.3731962272790322 | 0.6581450020952082 | 0.4581440304462054 |
| 0.0347642685105301 | 0.9823022005533273 | 0.2869094040558714 |
| 0.7076057441440884 | 0.3315322870928560 | 0.6198466578206040 |
| 0.7653584229216952 | 0.7058664741458794 | 0.2990090583505635 |
| 0.4209133763534728 | 0.0247090270999226 | 0.6553570774952768 |
| 0.0890181472397517 | 0.3642014669378642 | 0.4678737600802225 |
| 0.0286863552673260 | 0.1971249671432608 | 0.2980722794773101 |
| 0.6820682725742269 | 0.5330859815751303 | 0.6405069871632634 |
| 0.3641803117314192 | 0.8579998626500593 | 0.4635486330566054 |
| 0.2793787640459459 | 0.9692523215983507 | 0.2668677475324683 |
| 0.9562893519751378 | 0.3179523382027538 | 0.6114710523881827 |

|                    |                    |                    |
|--------------------|--------------------|--------------------|
| 0.6241980023924352 | 0.6411980954461906 | 0.4441747741871173 |
| 0.2244520133795254 | 0.3169036590580059 | 0.3768129122543811 |
| 0.8832898277902967 | 0.6465003959496023 | 0.7080710214285169 |
| 0.5575084298968240 | 0.9858514836674707 | 0.5424657062355089 |
| 0.2672107930206333 | 0.9751217046765461 | 0.5292734374853744 |
| 0.9266952418825842 | 0.3055574260502589 | 0.3406350795042313 |
| 0.7592635954757202 | 0.1950033913563275 | 0.5360098358361218 |
| 0.4224537075804875 | 0.5277468184979205 | 0.3671597729958127 |
| 0.0972630955381877 | 0.8664137274018687 | 0.6970317594615271 |
| 0.5457478134899477 | 0.7163169881598098 | 0.5619933418425075 |
| 0.2132148391112696 | 0.0565501085777824 | 0.3854290834876915 |
| 0.8704309800167745 | 0.3925677163734368 | 0.7291174658826005 |
| 0.1812602911274237 | 0.8084670340823514 | 0.3769101773448789 |
| 0.8547113449516440 | 0.1404649519287800 | 0.7108334254141998 |
| 0.5128126759963746 | 0.4697528396602342 | 0.5505116639076466 |
| 0.5291793933329666 | 0.1876780551051436 | 0.5272214480687145 |
| 0.1934196600804936 | 0.5211775000780894 | 0.3496864833793776 |
| 0.8670542144761560 | 0.8756741140118013 | 0.7029143290280091 |
| 0.3018741183068773 | 0.4623022461660004 | 0.5314942104107678 |
| 0.9694123189885729 | 0.7925760858841134 | 0.3632568609093942 |
| 0.6330263259911363 | 0.1340404337339039 | 0.6992079187574710 |
| 0.7845310739912937 | 0.7293433307893843 | 0.5592162096995269 |
| 0.4375431498698510 | 0.0531754514183245 | 0.3856397870978721 |
| 0.1142151848932469 | 0.3847183842853128 | 0.7274697510343752 |
| 0.6898748854202272 | 0.2718047451229519 | 0.3785457877470191 |
| 0.3641772623388159 | 0.6164622041927721 | 0.7090199242646908 |
| 0.0286868347367678 | 0.9425820571548598 | 0.5420658186276484 |
| 0.3020303154750604 | 0.2296957200758648 | 0.5255788153418838 |
| 0.9762756532725995 | 0.5711982598486006 | 0.3463116748004524 |
| 0.6327578298195355 | 0.9001084485037235 | 0.7019099266824637 |
| 0.0351385339944494 | 0.7407154879226225 | 0.5324876749522723 |
| 0.7040069844984136 | 0.0758146540473196 | 0.3641926858987960 |
| 0.3781469787121384 | 0.4060951679349358 | 0.6826790452767711 |
| 0.7731357027432850 | 0.9568496141032364 | 0.5578172400059180 |
| 0.4430732769333304 | 0.2824169516898478 | 0.3914729610764237 |
| 0.1185221872968838 | 0.6296341349358369 | 0.7278673198643310 |
| 0.6407470565977317 | 0.6983312399721999 | 0.7308164369199887 |
| 0.5400842613345186 | 0.4711951249347814 | 0.8195568449203298 |
| 0.1380872009772463 | 0.1440213094286266 | 0.3303228875043290 |
| 0.8077299232666686 | 0.4818191973595055 | 0.6737116328346766 |
| 0.5968069235360980 | 0.6212940055042964 | 0.3235721597012886 |
| 0.2544057460800630 | 0.9541268416532604 | 0.6512199780799406 |
| 0.9241171823176251 | 0.2899409660511905 | 0.4961144563376949 |
| 0.4696419386958279 | 0.8106650031093996 | 0.5124208004014777 |

|                    |                    |                    |
|--------------------|--------------------|--------------------|
| 0.3527396957557688 | 0.8927682517556638 | 0.3295446337489034 |
| 0.0204419213391065 | 0.2333420731296924 | 0.6738741515311584 |
| 0.8747789036379722 | 0.8744878032803599 | 0.3202737788461103 |
| 0.5434695472475389 | 0.1971149633678536 | 0.6500518972199075 |
| 0.2078004093187495 | 0.5335579181297351 | 0.4918618091875241 |
| 0.6866237043685665 | 0.5582117503699268 | 0.5160707412555608 |
| 0.6034708378997931 | 0.3583047960977225 | 0.3351780149674184 |
| 0.2683392972908272 | 0.6878224815122418 | 0.6723285992472698 |
| 0.6230777815084411 | 0.8996408063179538 | 0.3210308148856508 |
| 0.2994035256427433 | 0.2438544343920999 | 0.6472371207048393 |
| 0.9638372422307834 | 0.5741668807179726 | 0.4934124620956335 |
| 0.9400270479666412 | 0.0304323380580489 | 0.5111407283526673 |
| 0.9301736759799304 | 0.7896624656061906 | 0.4858376039338937 |
| 0.4737367808374125 | 0.3056869915070305 | 0.5096327744772533 |
| 0.1436334625299327 | 0.6445659182826204 | 0.3466566267734359 |
| 0.8028311253799135 | 0.9808309862023510 | 0.6770374829370694 |
| 0.5866863858013155 | 0.1178973677555962 | 0.3241119718119895 |
| 0.2627579770122933 | 0.4561072967374858 | 0.6613596994447979 |
| 0.7099200703687982 | 0.0414227713227024 | 0.4865158735880011 |
| 0.1886734602082004 | 0.0631377879246693 | 0.5005782133296239 |
| 0.8530769650319712 | 0.3984137968676736 | 0.3459140308222253 |
| 0.5216430617907311 | 0.7318275072684969 | 0.6781739800368867 |
| 0.3804112225119849 | 0.3674152553092802 | 0.3278343037402734 |
| 0.0456678863055499 | 0.7054204073108343 | 0.6636465884331897 |
| 0.4585159616293286 | 0.5672899612920045 | 0.4909682880092912 |
| 0.4340452734644539 | 0.0234445627464413 | 0.5013655241961577 |
| 0.0977321904498998 | 0.3531364968123524 | 0.3460182021232295 |
| 0.7829606715458227 | 0.7069826404023881 | 0.6777406703586877 |
| 0.1287930495168417 | 0.9097049072568232 | 0.3220446846558647 |
| 0.7950107771860336 | 0.2428899334930367 | 0.6675686287046479 |
| 0.7001364948235986 | 0.3000256544086706 | 0.4990722615334266 |
| 0.6998510052822642 | 0.8001503778735489 | 0.4998553998662957 |
| 0.1968581779150509 | 0.2970952739694125 | 0.4973849939126964 |
| 0.1998155988116746 | 0.7999522359983675 | 0.4979673852920194 |
| 0.8683440038294580 | 0.1275806519710871 | 0.3337050231727427 |
| 0.3720875429459138 | 0.6412143757315030 | 0.3369452825135021 |
| 0.0312141529809853 | 0.9625028886065620 | 0.6634237984063668 |
| 0.3653546876528096 | 0.1319786200466894 | 0.3132433711099061 |
| 0.0332304980505981 | 0.4677170766249966 | 0.6844397991172952 |
| 0.8547205584552274 | 0.6282476392222834 | 0.3358197982472329 |
| 0.5419590437896554 | 0.9729842271633014 | 0.6638929120640165 |
| 0.5279712804045669 | 0.4663487104654347 | 0.6577982002759403 |
| 0.5389542493902740 | 0.4722672064972624 | 0.7554880725228237 |
| 0.6670454424158136 | 0.7456279726018933 | 0.7735401689341705 |

**The perfect Ni<sub>11</sub>-O<sub>v6</sub>-[TS-CO-O]\* surface**

| O                   | In                  | Ni                  | C |
|---------------------|---------------------|---------------------|---|
| 1.000000000000000   |                     |                     |   |
| 12.5091304782646002 | -7.2221498489373399 | 0.000000000000000   |   |
| 0.000000000000000   | 14.4442996978254001 | 0.000000000000000   |   |
| 0.000000000000000   | 0.000000000000000   | 17.9855003356999994 |   |

| O  | In | Ni | C |
|----|----|----|---|
| 73 | 47 | 1  | 1 |

**Direct**

|                    |                    |                    |
|--------------------|--------------------|--------------------|
| 0.8404532892070208 | 0.6124917440539849 | 0.4568810436792198 |
| 0.5148269473730843 | 0.9515102096666952 | 0.2886609040966141 |
| 0.1744295797056133 | 0.2828128399234854 | 0.6206269723655053 |
| 0.7917374672773353 | 0.9603127078608621 | 0.2977804344568825 |
| 0.4729561821658210 | 0.2945779329771785 | 0.6433352321160228 |
| 0.1321617989642371 | 0.6253905495526513 | 0.4684928495410244 |
| 0.3002197564985568 | 0.7302768963765238 | 0.2996644601029200 |
| 0.9778637569050832 | 0.0726962895808085 | 0.6344475777427717 |
| 0.6399952942776823 | 0.4047590113451332 | 0.4654674359657506 |
| 0.5283646892649320 | 0.2096844652019999 | 0.2695362209734051 |
| 0.1848545407226120 | 0.5415224514486279 | 0.6091600658593475 |
| 0.8553629990776385 | 0.8820340957835016 | 0.4413533890713314 |
| 0.8857225963984126 | 0.1284626901174134 | 0.4557559731734183 |
| 0.5464305708879758 | 0.4620549727313445 | 0.2902666648144608 |
| 0.2180653850988762 | 0.7913448966922955 | 0.6198304382298935 |
| 0.5383044055499210 | 0.7308623021828430 | 0.2988788729758068 |
| 0.2072783156667843 | 0.0790236574402060 | 0.6548300259035541 |
| 0.8747309933787824 | 0.4067709651499211 | 0.4679882442245789 |
| 0.7668761096393866 | 0.4683564702486678 | 0.2999355219937219 |
| 0.4287406116206969 | 0.8066666881658939 | 0.6361196378582565 |
| 0.0927985571265562 | 0.1338514439794633 | 0.4638327880795261 |
| 0.2897096850782317 | 0.2187554429628662 | 0.2696398762333170 |
| 0.9573220346490507 | 0.5429448196210911 | 0.6099468620758874 |
| 0.6166893043731277 | 0.8730016763938405 | 0.4417773858043311 |
| 0.3719814778271762 | 0.6581386986988853 | 0.4574925723124231 |
| 0.0354690826733446 | 0.9830700464994506 | 0.2884360641253960 |
| 0.7090974957363210 | 0.3285584255697380 | 0.6196326254341632 |
| 0.7662674949426014 | 0.7062078668048160 | 0.2991012498508388 |
| 0.4219051432878549 | 0.0286147631894154 | 0.6556126778842254 |
| 0.0901693506560468 | 0.3648226536543790 | 0.4685460278571296 |
| 0.0296638617995851 | 0.1977372581297612 | 0.2989638994179000 |
| 0.6840490609549226 | 0.5226980477400047 | 0.6362346857898605 |
| 0.3643269601075810 | 0.8584622351219433 | 0.4647780317157669 |
| 0.2797963167701581 | 0.9699363528017904 | 0.2683434006476723 |
| 0.9563110951466859 | 0.3160678128172333 | 0.6114419081547962 |



|                    |                    |                    |
|--------------------|--------------------|--------------------|
| 0.6241385023055909 | 0.6409537104879378 | 0.4435208371369665 |
| 0.2255517718878373 | 0.3169503837940515 | 0.3778366334726622 |
| 0.8810744929838930 | 0.6460070063666408 | 0.7064094550683035 |
| 0.5574356986782983 | 0.9862422084129283 | 0.5434312299417010 |
| 0.2671865752280438 | 0.9750391291037509 | 0.5300773732079318 |
| 0.9273779933920601 | 0.3055653987953723 | 0.3426322564806249 |
| 0.7591187598424609 | 0.1943933724019969 | 0.5349710055507687 |
| 0.4225053759961482 | 0.5281049479077032 | 0.3662829478581182 |
| 0.0978329866493765 | 0.8673324485297775 | 0.6985245999219616 |
| 0.5434316655912153 | 0.7168968307029200 | 0.5602907838492230 |
| 0.2141629585617446 | 0.0580518129826991 | 0.3870068009423720 |
| 0.8705205528688559 | 0.3912103203418839 | 0.7291367647635635 |
| 0.1816435554195611 | 0.8089946209771424 | 0.3781128646145532 |
| 0.8541545770696666 | 0.1386700635101761 | 0.7109428580768213 |
| 0.5131278787709480 | 0.4689889210724377 | 0.5485584900162259 |
| 0.5267204159421301 | 0.1896078325288216 | 0.5290815124323531 |
| 0.1935614316625108 | 0.5214742170363174 | 0.3489570808011694 |
| 0.8627175905706231 | 0.8708818949556204 | 0.7020101508677231 |
| 0.3029453315103679 | 0.4631535408324425 | 0.5322698591891054 |
| 0.9698457008089161 | 0.7929522929042220 | 0.3640637271648668 |
| 0.6327222855770428 | 0.1325828570813306 | 0.6995181190473519 |
| 0.7829071916910111 | 0.7266732236624113 | 0.5589205037322361 |
| 0.4388198021603754 | 0.0544451271544709 | 0.3870554521557432 |
| 0.1134435804746360 | 0.3835903221728074 | 0.7280711705349660 |
| 0.6902571210447301 | 0.2718327351716261 | 0.3783078463516818 |
| 0.3618889622982190 | 0.6155951912416987 | 0.7103757349281234 |
| 0.0285561291056753 | 0.9419006054913056 | 0.5430060493469684 |
| 0.3052699029802744 | 0.2308352838485375 | 0.5274948295700062 |
| 0.9769486585934317 | 0.5714025017888268 | 0.3459868041246530 |
| 0.6319709607996680 | 0.8951535246320400 | 0.7019915687210574 |
| 0.0350041738829879 | 0.7404255583917778 | 0.5336498257065461 |
| 0.7047999200882185 | 0.0760949410828409 | 0.3642658470445871 |
| 0.3814331081214397 | 0.4091761785550178 | 0.6840190510283465 |
| 0.7735170426755151 | 0.9567884522941388 | 0.5587172561052087 |
| 0.4434360786667148 | 0.2832122924679144 | 0.3897663542945297 |
| 0.1175286409461135 | 0.6293530562457091 | 0.7282979970906879 |
| 0.6120514038170054 | 0.6486290366884098 | 0.7095389076345160 |
| 0.5618996950002636 | 0.4996420237871201 | 0.8189410783537656 |
| 0.1390197578599715 | 0.1446739573328189 | 0.3312586410279423 |
| 0.8085704785137869 | 0.4804871696618008 | 0.6733076274650139 |
| 0.5973528447825623 | 0.6219883080551737 | 0.3229496025302360 |
| 0.2547826536696261 | 0.9548585924851314 | 0.6520329515432846 |
| 0.9245073185051497 | 0.2896663402618807 | 0.4958107043992546 |
| 0.4693065875594694 | 0.8103368885006766 | 0.5135601143173489 |

|                    |                    |                    |
|--------------------|--------------------|--------------------|
| 0.3532472789802590 | 0.8934766557538576 | 0.3309522249275627 |
| 0.0204744092265840 | 0.2321249828991048 | 0.6746481715051018 |
| 0.8752221239648250 | 0.8747188872717668 | 0.3212562841428029 |
| 0.5457082483580653 | 0.2002768054368447 | 0.6509670191718588 |
| 0.2081514975037433 | 0.5340182650778452 | 0.4927147721553715 |
| 0.6877130667524012 | 0.5578336154174904 | 0.5143113419203106 |
| 0.6043669745773835 | 0.3588746102550663 | 0.3335727796801720 |
| 0.2683467990253929 | 0.6881526041240303 | 0.6737031454590645 |
| 0.6236396747885520 | 0.9001732332295682 | 0.3215393118779728 |
| 0.3020878886447786 | 0.2465917309986868 | 0.6485144441466126 |
| 0.9642481621691432 | 0.5740254875117989 | 0.4940319532585565 |
| 0.9401371337999376 | 0.0300246758353107 | 0.5125196185821228 |
| 0.9296029059307623 | 0.7889597685383458 | 0.4867106032018518 |
| 0.4748933432666131 | 0.3079428987955191 | 0.5068241080691005 |
| 0.1441459194728749 | 0.6450964880670158 | 0.3469947941289080 |
| 0.8014219288398768 | 0.9780173510420501 | 0.6787942126138903 |
| 0.5871494917206240 | 0.1179732406335044 | 0.3244108032582064 |
| 0.2629183037601001 | 0.4566576684235822 | 0.6627581408721501 |
| 0.7100594010600594 | 0.0407154829517524 | 0.4869038610275823 |
| 0.1893102060795621 | 0.0638364449547862 | 0.5025760660717915 |
| 0.8537964860001207 | 0.3987124204115651 | 0.3462761374804085 |
| 0.5223584532858717 | 0.7259102759029122 | 0.6798284968718059 |
| 0.3807003223747421 | 0.3682644299863005 | 0.3264639588639144 |
| 0.0445349275958442 | 0.7053040006523859 | 0.6644156249252148 |
| 0.4586156212168278 | 0.5682886118088761 | 0.4900277860401140 |
| 0.4343809637533792 | 0.0241524597299238 | 0.5028178843368919 |
| 0.0988139557541697 | 0.3536879215779385 | 0.3467384838227428 |
| 0.7749361110932548 | 0.7016865153938667 | 0.6785043020591994 |
| 0.1294305532210317 | 0.9106625665291318 | 0.3238774917203762 |
| 0.7952057786957416 | 0.2411300677820692 | 0.6675506450231758 |
| 0.7000648526673563 | 0.2995115839722028 | 0.4988079586778984 |
| 0.6993384347589009 | 0.7996216241169908 | 0.5006912224276968 |
| 0.1983645318689679 | 0.2981909032482187 | 0.4984813609819226 |
| 0.1998521552214339 | 0.7999673855444824 | 0.4991016458560605 |
| 0.8690967238806494 | 0.1275036693951064 | 0.3344091804728406 |
| 0.3721116247844166 | 0.6417844673400009 | 0.3365793633677679 |
| 0.0293794197570363 | 0.9599327401068458 | 0.6642685619643026 |
| 0.3658425669542814 | 0.1325973526968917 | 0.3136017008682906 |
| 0.0333234302142109 | 0.4671836189544038 | 0.6845698490569027 |
| 0.8559113007916876 | 0.6286896750930575 | 0.3355009366962877 |
| 0.5419586584277976 | 0.9713738251761749 | 0.6648778076355895 |
| 0.5309200764664137 | 0.4650422464094694 | 0.6565524995225563 |
| 0.5565164212638434 | 0.5003755804385593 | 0.7548895860266873 |

### The perfect Ni<sub>11</sub>-CO\*<sub>P</sub> surface

O In Ni C

|                     |                     |                     |  |
|---------------------|---------------------|---------------------|--|
| 1.000000000000000   |                     |                     |  |
| 12.5091304782646002 | -7.2221498489373399 | 0.000000000000000   |  |
| 0.000000000000000   | 14.4442996978254001 | 0.000000000000000   |  |
| 0.000000000000000   | 0.000000000000000   | 17.9855003356999994 |  |

|    |    |    |   |
|----|----|----|---|
| O  | In | Ni | C |
| 73 | 47 | 1  | 1 |

Direct

|                    |                    |                    |
|--------------------|--------------------|--------------------|
| 0.8405395172021309 | 0.6122814290975738 | 0.4569848785098583 |
| 0.5148107373587357 | 0.9515440564256944 | 0.2887106882798791 |
| 0.1750409074180941 | 0.2834163218318130 | 0.6208349186113351 |
| 0.7916448828303213 | 0.9602342421132395 | 0.2977192932319117 |
| 0.4723967843954643 | 0.2930943066340454 | 0.6424669061018846 |
| 0.1320449442480646 | 0.6253182938808693 | 0.4684546470641511 |
| 0.3001011122784201 | 0.7301305374253017 | 0.2996282607203758 |
| 0.9782254674622328 | 0.0732492738137896 | 0.6344054727266419 |
| 0.6396494135665067 | 0.4051469672494710 | 0.4663728567409104 |
| 0.5281537098660546 | 0.2096330307532081 | 0.2698049923415029 |
| 0.1849627440258001 | 0.5415933487236042 | 0.6091275893106998 |
| 0.8553969040934332 | 0.8821003100079654 | 0.4413775274151343 |
| 0.8857840616467842 | 0.1284577864886971 | 0.4557568067230529 |
| 0.5461225105619896 | 0.4618186631522964 | 0.2902989851347541 |
| 0.2181363562833872 | 0.7913910226592851 | 0.6197259380094050 |
| 0.5381232611206510 | 0.7305715345516933 | 0.2990630071134488 |
| 0.2073003073493636 | 0.0790609821012151 | 0.6548271859804596 |
| 0.8746859041449716 | 0.4066951705464313 | 0.4680006469543690 |
| 0.7665785130689776 | 0.4682836708066353 | 0.3001380987556362 |
| 0.4289110412652553 | 0.8065572729111510 | 0.6361088920759549 |
| 0.0929660667508699 | 0.1340002176102687 | 0.4639734127565612 |
| 0.2897670664043926 | 0.2187024036980988 | 0.2699896481691769 |
| 0.9576715657696024 | 0.5430285063559104 | 0.6099121702227659 |
| 0.6169399923028075 | 0.8733090534220043 | 0.4415632334677007 |
| 0.3714714938215466 | 0.6580236198827945 | 0.4574493478171685 |
| 0.0353818231079037 | 0.9830060091167859 | 0.2885048232285072 |
| 0.7093215837818317 | 0.3283698002896087 | 0.6197682691227927 |
| 0.7660597328955199 | 0.7060765017801169 | 0.2993723251300791 |
| 0.4220110527570624 | 0.0282700018575143 | 0.6557034481584002 |
| 0.0902386162819919 | 0.3648252139318930 | 0.4686332613644835 |
| 0.0295587227892003 | 0.1975967652640530 | 0.2989924419215200 |
| 0.6842628346317631 | 0.5217006668305987 | 0.6368534984183138 |
| 0.3642732822448013 | 0.8584578477522397 | 0.4646333674450589 |
| 0.2797038122740282 | 0.9698154849902653 | 0.2684464848870870 |
| 0.9564248241688276 | 0.3161589615094469 | 0.6114078862474811 |

|                    |                    |                    |
|--------------------|--------------------|--------------------|
| 0.6239485189176942 | 0.6401900653019973 | 0.4438326613256346 |
| 0.2254073573027137 | 0.3168989745004174 | 0.3778919580050142 |
| 0.8810167273319711 | 0.6466063361736472 | 0.7055703867572458 |
| 0.5573833009043769 | 0.9861504676086600 | 0.5434629937213348 |
| 0.2673017904660092 | 0.9751670422067352 | 0.5301306506605117 |
| 0.9272819452656937 | 0.3055320531850368 | 0.3426853439154695 |
| 0.7592714019606008 | 0.1944035710118200 | 0.5350558672567918 |
| 0.4224853406684275 | 0.5279910391010326 | 0.3668073300060515 |
| 0.0981084421856583 | 0.8675972512441477 | 0.6986462723500555 |
| 0.5431644244827312 | 0.7177937956200040 | 0.5592343093630529 |
| 0.2140658048150345 | 0.0579209258911251 | 0.3871427778295022 |
| 0.8708204949871566 | 0.3914000886091675 | 0.7292564989882605 |
| 0.1815235744201399 | 0.8088841505933074 | 0.3781016776054352 |
| 0.8545974688094073 | 0.1389670863112877 | 0.7110976344142286 |
| 0.5143153900085178 | 0.4710273034308212 | 0.5513838627842818 |
| 0.5271436623342786 | 0.1895150771905542 | 0.5288738414188355 |
| 0.1933679355512882 | 0.5212438963633408 | 0.3488101573106885 |
| 0.8629509810302356 | 0.8713700555509828 | 0.7021954498617705 |
| 0.3033995022436495 | 0.4631913193052075 | 0.5325055308097252 |
| 0.9697890723114637 | 0.7928722940040924 | 0.3641083270526581 |
| 0.6329075406847656 | 0.1323943627159765 | 0.6996556085783798 |
| 0.7832218935062788 | 0.7267224369621946 | 0.5587236802540597 |
| 0.4386591175751430 | 0.0543273616382705 | 0.3870213911321855 |
| 0.1136569191392681 | 0.3838414815970613 | 0.7281771764290832 |
| 0.6899912877309123 | 0.2720585568734212 | 0.3785335323904514 |
| 0.3618425769144639 | 0.6155731889189088 | 0.7101978822235507 |
| 0.0286801121475529 | 0.9420117221916057 | 0.5431213983680279 |
| 0.3054016995378915 | 0.2314069632354072 | 0.5275364467385472 |
| 0.9768503371476712 | 0.5712780240511628 | 0.3458092504523407 |
| 0.6322386112216791 | 0.8954216472594969 | 0.7020599387466346 |
| 0.0351362653393820 | 0.7404613830998362 | 0.5336633597314764 |
| 0.7047834014833435 | 0.0762885454729909 | 0.3642212524433351 |
| 0.3820027328455825 | 0.4088372191626553 | 0.6853571718379825 |
| 0.7736700852777548 | 0.9568304377134347 | 0.5588490016797114 |
| 0.4435764180179529 | 0.2835385254095519 | 0.3905543503086812 |
| 0.1176707953047627 | 0.6295816622416569 | 0.7281725193346104 |
| 0.6111302887505855 | 0.6480515095558874 | 0.7044072588026780 |
| 0.5605309893275905 | 0.4820450825584153 | 0.8221065600158511 |
| 0.1389157888944637 | 0.1445623209616404 | 0.3313946151596026 |
| 0.8091484892000040 | 0.4806591243208341 | 0.6733249354243318 |
| 0.5971464482463277 | 0.6216932765809953 | 0.3232258702736467 |
| 0.2549503058800279 | 0.9548903596754907 | 0.6520463307807836 |
| 0.9244788340264243 | 0.2895809248774869 | 0.4958482326471091 |
| 0.4692389522537829 | 0.8104861166712443 | 0.5134468676420300 |

|                    |                    |                    |
|--------------------|--------------------|--------------------|
| 0.3531584729437064 | 0.8933160763945213 | 0.3309170408867041 |
| 0.0206945310394082 | 0.2324341190616568 | 0.6747627045128792 |
| 0.8751347264479316 | 0.8746407412083427 | 0.3213283862420935 |
| 0.5458773122711467 | 0.1994666209330770 | 0.6507062423036254 |
| 0.2081387114215698 | 0.5339951720437955 | 0.4928329918661104 |
| 0.6882191397494011 | 0.5583330966162897 | 0.5149964554798095 |
| 0.6040981212138180 | 0.3588489840924979 | 0.3338582358502010 |
| 0.2685847036736053 | 0.6882551876681592 | 0.6736547187537077 |
| 0.6235429759360671 | 0.9000831619890143 | 0.3214992209449111 |
| 0.3020365625714295 | 0.2465018317897034 | 0.6485125079327423 |
| 0.9643084116200150 | 0.5739940420191805 | 0.4939665212421345 |
| 0.9401981052256039 | 0.0300816449538013 | 0.5126161128583906 |
| 0.9297216358815373 | 0.7890092435458788 | 0.4868300834747306 |
| 0.4752296726151288 | 0.3083301634943100 | 0.5077691560986555 |
| 0.1440669253000183 | 0.6449395050969953 | 0.3469448063588259 |
| 0.8014612167766083 | 0.9781932007237248 | 0.6789511617175338 |
| 0.5870774780082697 | 0.1179746194729412 | 0.3245427509955597 |
| 0.2634167437290906 | 0.4569911866090219 | 0.6630242572098012 |
| 0.7100636525298887 | 0.0406649262272783 | 0.4869458163724194 |
| 0.1894356803310105 | 0.0639582327522600 | 0.5027112092353309 |
| 0.8536392135159085 | 0.3986503934769955 | 0.3463166201133143 |
| 0.5230983348724416 | 0.7256670774275844 | 0.6792928703635875 |
| 0.3806149902468213 | 0.3681696391013486 | 0.3268806213501927 |
| 0.0445869133596682 | 0.7056051180456693 | 0.6642187576551628 |
| 0.4588930092919702 | 0.5690013043665607 | 0.4905578535355860 |
| 0.4343918106291872 | 0.0240590604834848 | 0.5027956298906187 |
| 0.0986188130179316 | 0.3535689114239883 | 0.3467344108116671 |
| 0.7737155825818254 | 0.7019928336446813 | 0.6786884995847016 |
| 0.1293560360497054 | 0.9105453039157488 | 0.3239449370087503 |
| 0.7953587451067172 | 0.2411918282687422 | 0.6677195307467079 |
| 0.7001682572624239 | 0.2995651503161693 | 0.4989496736236058 |
| 0.6993424237891983 | 0.7996469062363315 | 0.5007118893654544 |
| 0.1984015325346689 | 0.2983532325595684 | 0.4984858313006921 |
| 0.1998722713995090 | 0.7999490720379930 | 0.4990636571735853 |
| 0.8689933594080362 | 0.1274235956275313 | 0.3344374657609442 |
| 0.3719518254434073 | 0.6415415749933150 | 0.3366903971268435 |
| 0.0292065666337447 | 0.9599006862609784 | 0.6643913453573400 |
| 0.3657519319182840 | 0.1324654953152521 | 0.3139220548906468 |
| 0.0337149339532355 | 0.4674405208631045 | 0.6844522033847045 |
| 0.8557946963360351 | 0.6286195175036021 | 0.3356431358153508 |
| 0.5421020625557348 | 0.9710015195756772 | 0.6649964958906872 |
| 0.5322123479271920 | 0.4651957911269762 | 0.6580247349552012 |
| 0.5521934395947334 | 0.4786853030618360 | 0.7585678189924260 |

### The perfect Ni<sub>11</sub>-H<sub>2</sub>\*\_P surface

O In Ni In H

|                     |                     |                     |
|---------------------|---------------------|---------------------|
| 1.000000000000000   |                     |                     |
| 14.4442996979000000 | 0.0000000000000000  | 0.0000000000000000  |
| -7.2221498489000000 | 12.5091304781999995 | 0.0000000000000000  |
| 0.0000000000000000  | 0.0000000000000000  | 17.9855003356999994 |

|    |    |    |    |   |
|----|----|----|----|---|
| O  | In | Ni | In | H |
| 72 | 41 | 1  | 6  | 2 |

Direct

|                    |                    |                    |
|--------------------|--------------------|--------------------|
| 0.8415250841955469 | 0.6126335779342137 | 0.4569954452129636 |
| 0.5152019538351936 | 0.9522212319533802 | 0.2893930573402997 |
| 0.1770615732984705 | 0.2839301899989081 | 0.6228517867503921 |
| 0.7927675930791831 | 0.9609330283251620 | 0.2978922775498749 |
| 0.4808194172439588 | 0.3063129061523863 | 0.6450889155133418 |
| 0.1327409874402389 | 0.6257783568815948 | 0.4694943273739373 |
| 0.3004302849591811 | 0.7314570375774678 | 0.2998569151165268 |
| 0.9775501984440650 | 0.0703076187828836 | 0.6369492418827185 |
| 0.6418433907247030 | 0.4053553830673552 | 0.4653673960484080 |
| 0.5290741739968823 | 0.2102792194124297 | 0.2701692140636662 |
| 0.1850628844707480 | 0.5410803339817686 | 0.6105612809417750 |
| 0.8565968311559524 | 0.8829580472453235 | 0.4416761457543994 |
| 0.8867884041420239 | 0.1286001771160571 | 0.4563494244195557 |
| 0.5474403773070088 | 0.4628927914173310 | 0.2901889864445424 |
| 0.2181251704837247 | 0.7923739699954030 | 0.6212407184161695 |
| 0.5387528983422367 | 0.7317667988382819 | 0.2979794422229622 |
| 0.2093061238046260 | 0.0813405668781669 | 0.6529900800798430 |
| 0.8754948527660216 | 0.4069008095242000 | 0.4687715755624723 |
| 0.7681017331052349 | 0.4687305506076739 | 0.300038882586610  |
| 0.4280969431644451 | 0.8056102613860033 | 0.6353906411763149 |
| 0.0944653282471764 | 0.1354990419915842 | 0.4667956731243234 |
| 0.2901098551187561 | 0.2191418899517235 | 0.2708457668359191 |
| 0.9578963980663783 | 0.5422090896767323 | 0.6107186806738107 |
| 0.6172912910909419 | 0.8743256697205568 | 0.4413578555554235 |
| 0.3714203331323866 | 0.6585850113444480 | 0.4567124126380304 |
| 0.0368544550120704 | 0.9843303067825924 | 0.2901142465419473 |
| 0.7101089941783773 | 0.3274877550540896 | 0.6202773545944980 |
| 0.7680084050215840 | 0.7070533045421136 | 0.2981629832513715 |
| 0.4226453448058037 | 0.0310417590825991 | 0.6569197682679109 |
| 0.0916956333490341 | 0.3660181143135871 | 0.4695784519481624 |
| 0.0311800338277370 | 0.1985750469192246 | 0.3001350330226131 |
| 0.6829039977929118 | 0.5182239865345020 | 0.6368812489382861 |
| 0.3645974098569768 | 0.8596065330013920 | 0.4651356543712421 |
| 0.2805795901094627 | 0.9709911831448558 | 0.2702955951026998 |
| 0.9569833824587564 | 0.3144627985604508 | 0.6120486816093825 |

|                    |                    |                    |
|--------------------|--------------------|--------------------|
| 0.6259258822715842 | 0.6431929595857397 | 0.4414169058244364 |
| 0.2269525414969830 | 0.3178612945126024 | 0.3794300884697610 |
| 0.8796871053482173 | 0.6449705904656234 | 0.7054736989479929 |
| 0.5577173128520571 | 0.9867911168697776 | 0.5438842964794697 |
| 0.2678141283659548 | 0.9753336584678181 | 0.5310748995117480 |
| 0.9285608151547492 | 0.3059850702339737 | 0.3441380487660606 |
| 0.5943131664552433 | 0.6206260081035765 | 0.6943010930045637 |
| 0.7598045297236105 | 0.1944490093779455 | 0.5350363490146877 |
| 0.4229287070362330 | 0.5291637560605001 | 0.3651286739146891 |
| 0.0980813101417392 | 0.8681385298980356 | 0.6999779627854592 |
| 0.5432522320284765 | 0.7180856953155724 | 0.5577397478519837 |
| 0.2151493775952006 | 0.0594445610392570 | 0.3896215064416562 |
| 0.8708830929477580 | 0.3896240336901961 | 0.7296175491050366 |
| 0.1817215379232804 | 0.8092387603444802 | 0.3794101634854862 |
| 0.8532627621342375 | 0.1361315612955171 | 0.7109215757137030 |
| 0.5152149658134054 | 0.4726410341369684 | 0.5452247170233792 |
| 0.5261744528717616 | 0.1913141718412367 | 0.5307513635442029 |
| 0.1939324229186511 | 0.5221095399970068 | 0.3483179497652933 |
| 0.8565747321864525 | 0.8639413449648733 | 0.7011550294796804 |
| 0.3047090103791990 | 0.4649058529631306 | 0.5336959327268538 |
| 0.9705034541006904 | 0.7934630979276266 | 0.3649320518225718 |
| 0.6325612814224381 | 0.1309920651554436 | 0.6993787877099250 |
| 0.7818457186759792 | 0.7252716431589771 | 0.5581549360357395 |
| 0.4403876029996823 | 0.0559371222722092 | 0.3882435069608124 |
| 0.1135264704647171 | 0.3827137731342533 | 0.7292440638887925 |
| 0.6912071825757435 | 0.2722999632537674 | 0.3788279471643225 |
| 0.3607115479868455 | 0.6156043892571298 | 0.7117348958862476 |
| 0.0284032066113921 | 0.9414456624875470 | 0.5439472728742701 |
| 0.3084588008084734 | 0.2339046666567987 | 0.5293317666323420 |
| 0.9777307455219333 | 0.5717539735121189 | 0.3464266729687968 |
| 0.6297654277113122 | 0.8884839025036235 | 0.7016774725886493 |
| 0.0349863834387813 | 0.7402941065485475 | 0.5350263521259119 |
| 0.7060791361749623 | 0.0770152548285694 | 0.3642137651247488 |
| 0.3882657909988758 | 0.4139785366550052 | 0.6885169067865268 |
| 0.7739648990844452 | 0.9569448083161992 | 0.5587713169295625 |
| 0.4448297038924566 | 0.2846572332726992 | 0.3899488687101920 |
| 0.1170079694571429 | 0.6291725876687883 | 0.7289614141983798 |
| 0.1402362491560895 | 0.1456077256621983 | 0.3334591930906289 |
| 0.8091249781580485 | 0.4791919714895518 | 0.6740674076993465 |
| 0.5986771008653208 | 0.6233935638185576 | 0.3216325780839116 |
| 0.2552725182711020 | 0.9562211281367555 | 0.6529772982634804 |
| 0.9256488386250250 | 0.2898947985006802 | 0.4961682712937727 |
| 0.4693662243073354 | 0.8110757735360944 | 0.5129494497323766 |
| 0.3539102066723768 | 0.8942437716617588 | 0.3324857486513921 |

|                    |                    |                    |
|--------------------|--------------------|--------------------|
| 0.0209813726203254 | 0.2310080033629445 | 0.6758921718548407 |
| 0.8762666918676502 | 0.8753649346995096 | 0.3216200223540390 |
| 0.5469434636851650 | 0.2024986043647730 | 0.6518970914253279 |
| 0.2090360600369786 | 0.5349270778562412 | 0.4942204174822783 |
| 0.6880618888653505 | 0.5583265606766724 | 0.5135434545090667 |
| 0.6056339464776536 | 0.3598189883919204 | 0.3335660734281394 |
| 0.2680044148348673 | 0.6883321197112066 | 0.6744685767860829 |
| 0.6244573956191389 | 0.9009786933989971 | 0.3212667023431564 |
| 0.3065602929110199 | 0.2506704692525653 | 0.6503905619629766 |
| 0.9647363284742346 | 0.5740004131172198 | 0.4949449949509173 |
| 0.9408526196181105 | 0.0301553415242806 | 0.5134443748769432 |
| 0.9298822761568424 | 0.7887650536144588 | 0.4872927977539872 |
| 0.4768838838751504 | 0.3112499721077493 | 0.5066980386098986 |
| 0.1447673382229410 | 0.6456703873832425 | 0.3478091511670839 |
| 0.7994859516975265 | 0.9748838310602030 | 0.6790634057857911 |
| 0.5880535513521669 | 0.1186709486147241 | 0.3248725855323762 |
| 0.2646927660555038 | 0.4568234106117354 | 0.6649340048639442 |
| 0.7106592191113611 | 0.0411051783909092 | 0.4869639783469353 |
| 0.1910267068050185 | 0.0658806674052394 | 0.5058784303656140 |
| 0.8548649633125288 | 0.3992382366396508 | 0.3469929736352043 |
| 0.5203086034036877 | 0.7189967982404976 | 0.6769765884886449 |
| 0.3815398367413004 | 0.3691575847778750 | 0.3266267123778961 |
| 0.0440451543353626 | 0.7052059034268847 | 0.6651673740124032 |
| 0.4593109785431293 | 0.5695262733936298 | 0.4882534655420475 |
| 0.4349967734786052 | 0.0255001344202738 | 0.5038576240862382 |
| 0.1002382270801395 | 0.3545855818614175 | 0.3476824958837642 |
| 0.7670522294868765 | 0.6937022124105181 | 0.6772525549101274 |
| 0.1304724250933491 | 0.9119763509545638 | 0.3259500809071734 |
| 0.7954233863417270 | 0.2394282582917251 | 0.6676028592872205 |
| 0.7006815511160340 | 0.2995517208492705 | 0.4993160019435576 |
| 0.6999191654673834 | 0.8001531337894578 | 0.4996255541034998 |
| 0.2003407018068370 | 0.3000545617627070 | 0.5002027622022267 |
| 0.2001133555265227 | 0.8004838640629124 | 0.5002560830696191 |
| 0.8703542336749757 | 0.1280407012916401 | 0.3349879738950283 |
| 0.5337424052264333 | 0.4693106781311353 | 0.6581197330419871 |
| 0.3721543537248080 | 0.6424103182484874 | 0.3358409562021823 |
| 0.0263799043987664 | 0.9562899017949065 | 0.6650050269092370 |
| 0.3667321054224534 | 0.1335313879206591 | 0.3149877489497470 |
| 0.0338777594326700 | 0.4665106140612481 | 0.6851119015072666 |
| 0.8571612956011639 | 0.6292253206127508 | 0.3356102974972628 |
| 0.5416116218082860 | 0.9694054300358574 | 0.6652149678905528 |
| 0.5662753645475636 | 0.6618035591232442 | 0.8413256869346720 |
| 0.5631189983888552 | 0.7012295953764354 | 0.8657454449072518 |



**The perfect Ni<sub>11</sub>-[TS-2H]\* surface**

| O                   | In | Ni                  | In | H                   |
|---------------------|----|---------------------|----|---------------------|
| 1.000000000000000   |    |                     |    |                     |
| 14.4442996979000000 |    | 0.0000000000000000  |    | 0.0000000000000000  |
| -7.2221498489000000 |    | 12.5091304781999995 |    | 0.0000000000000000  |
| 0.0000000000000000  |    | 0.0000000000000000  |    | 17.9855003356999994 |

| O  | In | Ni | In | H |
|----|----|----|----|---|
| 72 | 41 | 1  | 6  | 2 |

**Direct**

|                    |                    |                    |
|--------------------|--------------------|--------------------|
| 0.8410938331808180 | 0.6125355506456196 | 0.4570857054185783 |
| 0.5151833933013223 | 0.9519056068297878 | 0.2896891505157209 |
| 0.1768132320338839 | 0.2833233273259047 | 0.6227329632058036 |
| 0.7923233832736792 | 0.9604474606927588 | 0.2989672514326926 |
| 0.4801679659539935 | 0.3048496830004296 | 0.6435688453195213 |
| 0.1326001081702197 | 0.6261309602917764 | 0.4694949685264303 |
| 0.3008754610382232 | 0.7308473258065215 | 0.3010314513761086 |
| 0.9775471458572030 | 0.0704032502870787 | 0.6374866652008214 |
| 0.6413924415616999 | 0.4051571121863503 | 0.4646494619558856 |
| 0.5288871112511595 | 0.2100912740095428 | 0.2700482164316140 |
| 0.1829919055657920 | 0.5404876953990857 | 0.6097667613777473 |
| 0.8556268683859529 | 0.8818277260567273 | 0.4427642312941863 |
| 0.8866767025200167 | 0.1284183092497088 | 0.4564243455847500 |
| 0.5472996453090657 | 0.4632822194050356 | 0.2913721739206963 |
| 0.2173648667102194 | 0.7925168599046349 | 0.6210542957135261 |
| 0.5387087934980624 | 0.7317095728104386 | 0.3000008481839888 |
| 0.2084855184115625 | 0.0805868143776947 | 0.6535142134029215 |
| 0.8757146722234235 | 0.4068765612383541 | 0.4682707247759870 |
| 0.7678584658337972 | 0.4686507052922101 | 0.2999045524084903 |
| 0.4271883105361354 | 0.8091185318002825 | 0.6379918975932197 |
| 0.0940303293698419 | 0.1350257637423156 | 0.4666684355510650 |
| 0.2902257404268306 | 0.2195316998096197 | 0.2706927664422368 |
| 0.9578484215901095 | 0.5426367626772660 | 0.6105588459453042 |
| 0.6166932869419861 | 0.8737804685145013 | 0.4432303870983620 |
| 0.3726279441054233 | 0.6591014952681246 | 0.4593964915947349 |
| 0.0360850597520972 | 0.9838297183282402 | 0.2901054586750658 |
| 0.7116493058659898 | 0.3280404467314617 | 0.6193758698656493 |
| 0.7669182320492502 | 0.7065514626214295 | 0.2998796755013201 |
| 0.4225998606808441 | 0.0330290922161301 | 0.6568679680068105 |
| 0.0913062308890670 | 0.3650096807001130 | 0.4697608546105067 |
| 0.0308833567668691 | 0.1982196989073987 | 0.3001649178338202 |
| 0.6846397189882563 | 0.5162633297629605 | 0.6366728247148495 |
| 0.3645577393654982 | 0.8594482522315832 | 0.4659738132873228 |
| 0.2802748081475285 | 0.9707950955973124 | 0.2698214975428682 |
| 0.9571908077793372 | 0.3146492433454235 | 0.6120734136207078 |

|                    |                    |                    |
|--------------------|--------------------|--------------------|
| 0.6251284679057485 | 0.6442192326279629 | 0.4441178032475704 |
| 0.2265734198517174 | 0.3173870667585413 | 0.3795175583297243 |
| 0.8807201807434559 | 0.6440275552594908 | 0.7079434509803963 |
| 0.5575417053247157 | 0.9880061931787539 | 0.5443812861731652 |
| 0.2675581425233066 | 0.9753970193680062 | 0.5309686169671516 |
| 0.9284644393989536 | 0.3058866902964402 | 0.3434432520994244 |
| 0.5931777888172520 | 0.6108800305541829 | 0.6966964614676526 |
| 0.7598820980622418 | 0.1943764002001470 | 0.5350527920438640 |
| 0.4230215689987847 | 0.5289182790398321 | 0.3677194685111711 |
| 0.0976339646602297 | 0.8678180150837391 | 0.7000777822761736 |
| 0.5440220851644029 | 0.7198836117496978 | 0.5632295347142798 |
| 0.2147746655374219 | 0.0591069117780314 | 0.3890884027646694 |
| 0.8719706436080730 | 0.3899625913005197 | 0.7299656059603163 |
| 0.1819890139072520 | 0.8095459116887274 | 0.3791822941651893 |
| 0.8548626406956107 | 0.1380981662777842 | 0.7117605076341935 |
| 0.5155129656558507 | 0.4722659413152937 | 0.5461949831127333 |
| 0.5267894030619017 | 0.1916031030633418 | 0.5300898679496515 |
| 0.1943700573316002 | 0.5219935244533961 | 0.3508271504160232 |
| 0.8556517727557608 | 0.8633591676257334 | 0.7010425261192121 |
| 0.3040659937611929 | 0.4642868730509657 | 0.5347267669218098 |
| 0.9703447342739632 | 0.7931882325115235 | 0.3649685497324917 |
| 0.6332843344179053 | 0.1348024479886308 | 0.7009138538926051 |
| 0.7814706520500656 | 0.7241297021185255 | 0.5595169059659511 |
| 0.4397699408033408 | 0.0555417043959137 | 0.3878960637640448 |
| 0.1147368728953861 | 0.3833476404394714 | 0.7291006351061948 |
| 0.6913172707364933 | 0.2721416170309306 | 0.3783523767158765 |
| 0.3579905970857795 | 0.6151483699978764 | 0.7093524692657375 |
| 0.0282235690844933 | 0.9413150384702333 | 0.5441601667480606 |
| 0.3078374875101863 | 0.2331198700554865 | 0.5292808617228076 |
| 0.9777281712449446 | 0.5717191992402287 | 0.3459827860750297 |
| 0.6320859566487423 | 0.8980719429483552 | 0.7010449493496581 |
| 0.0346544046432251 | 0.7403380689314863 | 0.5348723889318294 |
| 0.7056282384492737 | 0.0765466949129026 | 0.3648742033435370 |
| 0.3879902280829495 | 0.4109204675632438 | 0.6898676269823183 |
| 0.7748268233574498 | 0.9577734514083405 | 0.5594064863129701 |
| 0.4441430663296195 | 0.2838068200245834 | 0.3898580922569564 |
| 0.1161792875893283 | 0.6289590528641956 | 0.7291378890271721 |
| 0.1400848725036330 | 0.1453341277983297 | 0.3328747487157470 |
| 0.8100065155495242 | 0.4786939181496871 | 0.6743056647377519 |
| 0.5979939129491174 | 0.6231864005341979 | 0.3241409207045857 |
| 0.2550584806250972 | 0.9563137708094837 | 0.6529264386039099 |
| 0.9253885173579888 | 0.2896152477256614 | 0.4963905491496340 |
| 0.4695554185951574 | 0.8119813224040492 | 0.5151974922016470 |
| 0.3537423063123490 | 0.8941176949272116 | 0.3322388264989188 |

|                    |                    |                    |
|--------------------|--------------------|--------------------|
| 0.0217633293438436 | 0.2317479959879693 | 0.6761627644309295 |
| 0.8756909769031077 | 0.8748499740670859 | 0.3225595755980571 |
| 0.5482526988284914 | 0.2042738539461146 | 0.6512522433379923 |
| 0.2083780540913573 | 0.5343145558207824 | 0.4940851863122488 |
| 0.6878367801434160 | 0.5574466417600817 | 0.5139979224455852 |
| 0.6053221301734327 | 0.3595587307397571 | 0.3335552155295290 |
| 0.2658796182314146 | 0.6876410360345125 | 0.6737911644108215 |
| 0.6241814946373965 | 0.9007557268896111 | 0.3228174114556856 |
| 0.3053896704525870 | 0.2491669157844156 | 0.6505355971566589 |
| 0.9645672493583327 | 0.5739705474432854 | 0.4949163438760368 |
| 0.9407568345100421 | 0.0300383267608097 | 0.5136441806741482 |
| 0.9294020711570364 | 0.7885657353289752 | 0.4874428028173238 |
| 0.4764034638740962 | 0.3108287036635185 | 0.5063569897964950 |
| 0.1448028936546506 | 0.6456644758916036 | 0.3480496951100090 |
| 0.8007595666274890 | 0.9770412884568476 | 0.6796116573202478 |
| 0.5877765768888612 | 0.1183549344169623 | 0.3248878167521155 |
| 0.2654158559049351 | 0.4565765235288678 | 0.6644356078291258 |
| 0.7104940432852264 | 0.0409641809041129 | 0.4875809058515221 |
| 0.1904240974681082 | 0.0653595905304600 | 0.5053393453133205 |
| 0.8549095521259733 | 0.3991632579537409 | 0.3465233724419058 |
| 0.5184628373943239 | 0.7289735833524525 | 0.6823585642397324 |
| 0.3814499527348739 | 0.3693478289393574 | 0.3274339994448743 |
| 0.0438645322326085 | 0.7051083492480991 | 0.6654665308124050 |
| 0.4597728854067899 | 0.5706370629182581 | 0.4917853544583914 |
| 0.4347381115768285 | 0.0258007554235100 | 0.5036040825563121 |
| 0.0999398572304136 | 0.3541625138643718 | 0.3479912021613921 |
| 0.7703524030315443 | 0.6929912203220184 | 0.6777317650436747 |
| 0.1301201479657577 | 0.9117080470439793 | 0.3255634380798333 |
| 0.7961328003588450 | 0.2401722977149780 | 0.6681158958613698 |
| 0.7008902924663963 | 0.2995589887565365 | 0.4987258763038295 |
| 0.6995568239438010 | 0.8003766619304220 | 0.5023851408290652 |
| 0.2000788331229737 | 0.2994886518260760 | 0.5003068824144082 |
| 0.1998170966942188 | 0.8006523961752560 | 0.5001031884639051 |
| 0.8700159462763659 | 0.1277511891521644 | 0.3352406105826250 |
| 0.5341142173167557 | 0.4634921500121594 | 0.6592221672746921 |
| 0.3727557612359775 | 0.6425282526886286 | 0.3382261113986156 |
| 0.0261460355190241 | 0.9562035213459107 | 0.6652061365117182 |
| 0.3664500886799916 | 0.1334189800962156 | 0.3146125784128624 |
| 0.0343886760060844 | 0.4665536091564922 | 0.6849388386062936 |
| 0.8567449791458034 | 0.6290025608509222 | 0.3357176979558960 |
| 0.5418145884929780 | 0.9742819579458865 | 0.6657641817275419 |
| 0.5749607120950121 | 0.6441310347197103 | 0.7548746176948911 |
| 0.5638685138366430 | 0.6948169768950000 | 0.7852300180155229 |

### The perfect Ni<sub>11</sub>-2H\* surface

O In Ni In H

1.000000000000000

14.4442996979000000 0.0000000000000000 0.0000000000000000

-7.2221498489000000 12.5091304781999995 0.0000000000000000

0.0000000000000000 0.0000000000000000 17.9855003356999994

O In Ni In H

72 41 1 6 2

Direct

0.8409581174749957 0.6127245882079342 0.4562877133351564

0.5150684201474424 0.9515802516445413 0.2893878736255236

0.1770171827495124 0.2832261736758963 0.6224168618042523

0.7920567570049809 0.9601771858300365 0.2989212635026450

0.4798229921296333 0.3037207426383665 0.6410606405404743

0.1322520298293156 0.6264338069690240 0.4685507458104922

0.3011439753641464 0.7307201868758101 0.3010096198696534

0.9780179559216163 0.0706655785780282 0.6373519932290715

0.6411613392573817 0.4050714806831308 0.4634112314768686

0.5289430292498553 0.2098481711856758 0.2691429752015919

0.1798580516867236 0.5394608029049157 0.6078440522333012

0.8549970197696903 0.8804744829458313 0.4424914399867225

0.8869802198102366 0.1286558496646527 0.4556759829520579

0.5474056549484745 0.4636585479589141 0.2908685781625924

0.2171821164476968 0.7922367608826796 0.6205209436212858

0.5387739833294301 0.7318315120036384 0.3002354466588144

0.2080832737666091 0.0795918880210445 0.6537488298622415

0.8758194963641025 0.4069471833910202 0.4675049154290061

0.7680291296513707 0.4685366383104456 0.2990240595175390

0.4275895904992178 0.8104165477658508 0.6402583719281881

0.0941984727010212 0.1349984808947122 0.4661577904506091

0.2904475467796118 0.2199977169497523 0.2698155733032930

0.9573589840404184 0.5431068559838234 0.6098023581192636

0.6158171441911525 0.8728638516908539 0.4440810067094620

0.3735651235187932 0.6595101625618522 0.4604648179639987

0.0357519926998856 0.9838664860442102 0.2898922439652698

0.7121946205867804 0.3285587589634069 0.6178327381762678

0.7663116106597287 0.7061281298636243 0.2998025994099005

0.4227360509423284 0.0345184657736687 0.6561717189281355

0.0912188505732455 0.3643594736259668 0.4692064656656256

0.0309794561998366 0.1984439993197898 0.2995512056049771

0.6851803322560039 0.5148288169420402 0.6353578996310002

0.3646013658002127 0.8586179063733657 0.4664710921856218

0.2801912374987676 0.9706869620857836 0.2690145459484460

0.9571253420941697 0.3146893495163454 0.6113926638206374

|                    |                    |                    |
|--------------------|--------------------|--------------------|
| 0.6244410114968683 | 0.6444421908308440 | 0.4449580586193185 |
| 0.2267167545056202 | 0.3173312787597641 | 0.3789150020027889 |
| 0.8812558816130478 | 0.6431031500303991 | 0.7091840272704184 |
| 0.5571595287001304 | 0.9889441910664060 | 0.5436828741475498 |
| 0.2673611258621321 | 0.9753592656284884 | 0.5304691268181400 |
| 0.9285118170897214 | 0.3058207803202559 | 0.3429103232002962 |
| 0.5931025167474343 | 0.6042953130236225 | 0.6974915582961768 |
| 0.7598210034030553 | 0.1942325822906340 | 0.5345466656279396 |
| 0.4232550811095504 | 0.5290539547715173 | 0.3682754802835851 |
| 0.0972733240875811 | 0.8673460115028834 | 0.6994836097366550 |
| 0.5447998504836506 | 0.7202625763002322 | 0.5675637113155748 |
| 0.2149463929442489 | 0.0594220736219792 | 0.3881697839223874 |
| 0.8720172544524056 | 0.3902832163309182 | 0.7294785063759009 |
| 0.1823897843605420 | 0.8100932699522071 | 0.3786632990761805 |
| 0.8573642204087003 | 0.1408596548118533 | 0.7126495463629230 |
| 0.5154677837966843 | 0.4715067487199108 | 0.5461480103416375 |
| 0.5267892820287399 | 0.1915305562577784 | 0.5287244792867903 |
| 0.1946723883497378 | 0.5222202067752951 | 0.3516346704127269 |
| 0.8556347335911783 | 0.8634593778856162 | 0.7003168579709251 |
| 0.3037305127120962 | 0.4637933349749128 | 0.5346573197790454 |
| 0.9704249265659840 | 0.7929639868804103 | 0.3639706544049179 |
| 0.6338481800533953 | 0.1382190262496467 | 0.7015875549404992 |
| 0.7810466193072348 | 0.7231721152228361 | 0.5598095796866870 |
| 0.4393070977485934 | 0.0552583781666806 | 0.3872094814318303 |
| 0.1147325280013513 | 0.3835565011422483 | 0.7285698340596017 |
| 0.6913176444870356 | 0.2720580890755142 | 0.3774821611140320 |
| 0.3544351534558675 | 0.6118443945666230 | 0.7059537733208102 |
| 0.0281939173971323 | 0.9412713408132761 | 0.5435736986458104 |
| 0.3076163667646039 | 0.2325625626041464 | 0.5286987849569453 |
| 0.9777740500294863 | 0.5717994419892001 | 0.3450552710864082 |
| 0.6372390551899234 | 0.9099497337178918 | 0.6958348814088903 |
| 0.0344723373571923 | 0.7404095517466227 | 0.5342629868550300 |
| 0.7053155820043251 | 0.0760579353362797 | 0.3647857783116884 |
| 0.3896187907545015 | 0.4081076323237189 | 0.6902018172886639 |
| 0.7768519968278285 | 0.9588454309304940 | 0.5581901258653157 |
| 0.4440292891516934 | 0.2835114757573959 | 0.3885735724455348 |
| 0.1156687630564842 | 0.6285187248228387 | 0.7285937846930887 |
| 0.1403264682362390 | 0.1456572609702614 | 0.3319446094654660 |
| 0.8102838546719378 | 0.4782413349510136 | 0.6735143114750182 |
| 0.5975643181751100 | 0.6231461925846146 | 0.3245803010662661 |
| 0.2550122569130584 | 0.9556466555131843 | 0.6524549988666339 |
| 0.9253235878515939 | 0.2893972624835833 | 0.4958969410858599 |
| 0.4696510288306309 | 0.8117283419141166 | 0.5180794344350407 |
| 0.3537070636883646 | 0.8940635448389309 | 0.3318498008624309 |

|                    |                    |                    |
|--------------------|--------------------|--------------------|
| 0.0220579069164966 | 0.2323073484837275 | 0.6762494144134553 |
| 0.8752841497822486 | 0.8745252259119968 | 0.3222565732449273 |
| 0.5494240542232303 | 0.2050564629973881 | 0.6497915503250448 |
| 0.2078859694633602 | 0.5341262709346416 | 0.4930450883904955 |
| 0.6878122993246337 | 0.5570256158161582 | 0.5131201252407792 |
| 0.6054398199047470 | 0.3595315182080866 | 0.3322616692771764 |
| 0.2651003493358683 | 0.6863386061048707 | 0.6727424302061339 |
| 0.6239247772607327 | 0.9005308905699246 | 0.3234162676785583 |
| 0.3039446231175429 | 0.2472402669068657 | 0.6498620821768540 |
| 0.9645465741341617 | 0.5740652413770380 | 0.4941977199894685 |
| 0.9409124547207957 | 0.0298874379248212 | 0.5126940212791231 |
| 0.9295224871721496 | 0.7885719744886551 | 0.4865570239201002 |
| 0.4760215209494968 | 0.3100293397812845 | 0.5046233066359153 |
| 0.1447976552103077 | 0.6460055419581723 | 0.3474574734990711 |
| 0.8024918008576064 | 0.9801049512634927 | 0.6787206371423078 |
| 0.5875800824077202 | 0.1180232558149319 | 0.3243946296656085 |
| 0.2641360983357198 | 0.4557825045688350 | 0.6629741573590615 |
| 0.7102613457305513 | 0.0406432685562114 | 0.4874420650101722 |
| 0.1902068436016911 | 0.0648910403469119 | 0.5042706677673046 |
| 0.8550703640955484 | 0.3991474848395144 | 0.3458505010742190 |
| 0.5196586341809240 | 0.7344540432454164 | 0.6893259212336453 |
| 0.3815466872645113 | 0.3698677591952701 | 0.3267564690584406 |
| 0.0442888082667157 | 0.7048590299097879 | 0.6651392786030370 |
| 0.4601707937536414 | 0.5720283812336892 | 0.4937558656673450 |
| 0.4344152873884445 | 0.0253004666193508 | 0.5028274618521507 |
| 0.0999308115970754 | 0.3541221578552978 | 0.3476378691705537 |
| 0.7746270228018953 | 0.6943471391649710 | 0.6771318909282084 |
| 0.1301113265128418 | 0.9118388819906844 | 0.3248242880184148 |
| 0.7965861860767202 | 0.2403867766742152 | 0.6680440584451846 |
| 0.7011062021758123 | 0.2995317898740681 | 0.4977053736543449 |
| 0.6987980678369339 | 0.8004186871184695 | 0.5037286451888131 |
| 0.2001609261839431 | 0.2994424341584122 | 0.4995962129741096 |
| 0.1998482993382233 | 0.8004536932773368 | 0.4996194209410031 |
| 0.8699997660729304 | 0.1276345825410857 | 0.3347991241633715 |
| 0.5328149992509393 | 0.4567211872243901 | 0.6579903877558351 |
| 0.3733701734765914 | 0.6430237702305076 | 0.3391080100279250 |
| 0.0263875602963270 | 0.9562982626372313 | 0.6646705422780453 |
| 0.3664202890502577 | 0.1334091940636097 | 0.3136029066433292 |
| 0.0342029151700438 | 0.4664400441357591 | 0.6840382062727494 |
| 0.8566861619344318 | 0.6288735621837971 | 0.3348653035263318 |
| 0.5424959729146644 | 0.9777587744110553 | 0.6652173369247522 |
| 0.5705107821530109 | 0.6007199134648156 | 0.7490029192574493 |
| 0.5603439445321194 | 0.7267313270144652 | 0.7816591310842033 |

### The perfect Ni<sub>11</sub>-[TS-H<sub>2</sub>O]\* surface

O In Ni In H

|                     |                     |                     |  |  |
|---------------------|---------------------|---------------------|--|--|
| 1.000000000000000   |                     |                     |  |  |
| 14.4442996979000000 | 0.0000000000000000  | 0.0000000000000000  |  |  |
| -7.2221498489000000 | 12.5091304781999995 | 0.0000000000000000  |  |  |
| 0.0000000000000000  | 0.0000000000000000  | 17.9855003356999994 |  |  |

|    |    |    |    |   |
|----|----|----|----|---|
| O  | In | Ni | In | H |
| 72 | 41 | 1  | 6  | 2 |

Direct

|                    |                    |                    |
|--------------------|--------------------|--------------------|
| 0.8394440419759265 | 0.6122706119392499 | 0.4573696075851838 |
| 0.5148712295553678 | 0.9512415044416334 | 0.2886101244172840 |
| 0.1722724062093683 | 0.2816715800234684 | 0.6195258875667629 |
| 0.7916746086828848 | 0.9601742337684986 | 0.2981386327727887 |
| 0.4682490406421350 | 0.2895043168916923 | 0.6424811834097645 |
| 0.1326115812096189 | 0.6250596707174936 | 0.4688973893017725 |
| 0.3001958003240812 | 0.7299354300105745 | 0.2998478726220572 |
| 0.9773891277681538 | 0.0723748348432931 | 0.6342130946705882 |
| 0.6402318210119260 | 0.4043542536286348 | 0.4651085537543456 |
| 0.5286530574343129 | 0.2094198064807759 | 0.2685948229921379 |
| 0.1840487322607595 | 0.5396123797105374 | 0.6098034949369153 |
| 0.8550126365066806 | 0.8813349884446581 | 0.4416161301143701 |
| 0.8857952696697337 | 0.1287216169929714 | 0.4557308445425367 |
| 0.5469695530323810 | 0.4625636963769201 | 0.2904979702107244 |
| 0.2172992149629307 | 0.7903963745206541 | 0.6196016195002478 |
| 0.5383472771829229 | 0.7310497785517693 | 0.2992603098067639 |
| 0.2053148786062745 | 0.0770719092622150 | 0.6546017303229706 |
| 0.8747362300134365 | 0.4062893863927884 | 0.4676609266288109 |
| 0.7673462721834194 | 0.4683009696404657 | 0.2994072364912935 |
| 0.4264841251486024 | 0.8089880798000676 | 0.6361710711881254 |
| 0.0927885154735241 | 0.1335602245209254 | 0.4629638385874870 |
| 0.2894077255623723 | 0.2187600906221405 | 0.2689589134571326 |
| 0.9568593902610276 | 0.5429280146714572 | 0.6097995342799132 |
| 0.6159113786289235 | 0.8722355800504481 | 0.4427181010912616 |
| 0.3730064456553284 | 0.6581039028040584 | 0.4584413189510829 |
| 0.0353027146376689 | 0.9828413207820463 | 0.2885850310872547 |
| 0.7082673346150337 | 0.3296990828638649 | 0.6187845954516052 |
| 0.7660535540760278 | 0.7060110876099005 | 0.2992562865072660 |
| 0.4213977511907742 | 0.0295786480175758 | 0.6559291719481961 |
| 0.0903986564564758 | 0.3647363978048553 | 0.4684113348360936 |
| 0.0298460756007669 | 0.1976721079058030 | 0.2990118246434914 |
| 0.6837297164278827 | 0.5260357287488697 | 0.6412697069667949 |
| 0.3639441630885413 | 0.8580942834629816 | 0.4644335248871230 |
| 0.2793206216211691 | 0.9693611585449111 | 0.2676953767469938 |
| 0.9560173864961903 | 0.3162504686454880 | 0.6113825066258807 |

|                    |                    |                    |
|--------------------|--------------------|--------------------|
| 0.6248809018196734 | 0.6432982910742139 | 0.4443927341195867 |
| 0.2260870223240435 | 0.3171374029766128 | 0.3777165142652049 |
| 0.8856644765539341 | 0.6453961342412544 | 0.7109598254536065 |
| 0.5567821663976085 | 0.9868912778688953 | 0.5427816197038409 |
| 0.2669210221100271 | 0.9745224357525424 | 0.5299682502925659 |
| 0.9275619430658356 | 0.3054568970692443 | 0.3420881288141464 |
| 0.6292889643109582 | 0.6732127650082228 | 0.7285822418963999 |
| 0.7589437636698675 | 0.1943734844881543 | 0.5353202537740243 |
| 0.4227780348376809 | 0.5282381425298341 | 0.3663216259035574 |
| 0.0975236263854064 | 0.8664358085552566 | 0.6984242572668522 |
| 0.5441756331819906 | 0.7167823361478660 | 0.5643574669731686 |
| 0.2146608951653464 | 0.0579675127497308 | 0.3866773073648385 |
| 0.8699282997304779 | 0.3910341167436393 | 0.7289264873636784 |
| 0.1814234923193584 | 0.8086707162878547 | 0.3778523277607290 |
| 0.8544413681759241 | 0.1395091406307427 | 0.7111092779163590 |
| 0.5130213226446126 | 0.4677935707404754 | 0.5436928731049457 |
| 0.5264705078328439 | 0.1892377202250882 | 0.5281642691539249 |
| 0.1939626959038505 | 0.5214576819216874 | 0.3491654355593850 |
| 0.8631947087133580 | 0.8705740606867404 | 0.7015938136602543 |
| 0.3035283994947668 | 0.4628685881025461 | 0.5334470130340210 |
| 0.9696336793169201 | 0.7925316730473942 | 0.3639620786348114 |
| 0.6328459923635495 | 0.1351789070657880 | 0.7001198664838576 |
| 0.7831346905020906 | 0.7265473924645742 | 0.5603468861077554 |
| 0.4383729216867222 | 0.0542360054171053 | 0.3861120154079292 |
| 0.1131348141170674 | 0.3827805418674177 | 0.7285907619098954 |
| 0.6903466518201452 | 0.2715154447023091 | 0.3776352966935638 |
| 0.3610365709368624 | 0.6148966711928903 | 0.7096239066210651 |
| 0.0285642733565169 | 0.9417386445826521 | 0.5426713866118618 |
| 0.3044542538639072 | 0.2302535926665051 | 0.5280725737447286 |
| 0.9768371708831362 | 0.5712756338264765 | 0.3471390086447355 |
| 0.6337883430302467 | 0.9021827642857795 | 0.6990611893658306 |
| 0.0346689405714074 | 0.7400862620378186 | 0.5332769792042050 |
| 0.7045654103529129 | 0.0756357057979491 | 0.3646131980697573 |
| 0.3794317083213401 | 0.4037868431989598 | 0.6918465647492722 |
| 0.7741414890326156 | 0.9572575375541597 | 0.5582231930118929 |
| 0.4431170894673430 | 0.2820769590105112 | 0.3880593556686907 |
| 0.1173071659321699 | 0.6280844386297512 | 0.7288810077280297 |
| 0.1391219726445593 | 0.1445615640917175 | 0.3312629134093497 |
| 0.8079149866675422 | 0.4807709185467537 | 0.6735158632667714 |
| 0.5975615392348532 | 0.6224090219109435 | 0.3239511606629829 |
| 0.2542758856710673 | 0.9540821938438888 | 0.6519211372614805 |
| 0.9246964074099192 | 0.2896799215802340 | 0.4958961445574159 |
| 0.4692387959369425 | 0.8107495051782374 | 0.5136244496516063 |
| 0.3529533904851592 | 0.8931604108519867 | 0.3304707672964797 |



|                    |                    |                    |
|--------------------|--------------------|--------------------|
| 0.0200362695576467 | 0.2321888341130177 | 0.6745809015485474 |
| 0.8750714414171106 | 0.8744219246604632 | 0.3214226537778356 |
| 0.5457746756671867 | 0.2010028041649511 | 0.6500661193230717 |
| 0.2083528465010004 | 0.5334683187306439 | 0.4937607345679453 |
| 0.6869846845547102 | 0.5567143871142165 | 0.5163009353823068 |
| 0.6047323412892082 | 0.3587410322442864 | 0.3326858548301186 |
| 0.2663350398774595 | 0.6863303096517741 | 0.6732633511209467 |
| 0.6235711334791975 | 0.8999628851233124 | 0.3221075500767909 |
| 0.2977476218467268 | 0.2442301792872532 | 0.6503916653379231 |
| 0.9640060404985590 | 0.5736885141669750 | 0.4938069965601968 |
| 0.9405166484257416 | 0.0300652802958634 | 0.5119163252199861 |
| 0.9294508128933153 | 0.7886554648708857 | 0.4865028100302211 |
| 0.4732138385895573 | 0.3060473890521193 | 0.5044495075502857 |
| 0.1441613500238184 | 0.6446489046206894 | 0.3474121883356974 |
| 0.8030843146038459 | 0.9796790419644665 | 0.6778891377714679 |
| 0.5870766693391142 | 0.1176536687268756 | 0.3239584080554910 |
| 0.2635959674491787 | 0.4539475431610605 | 0.6644571352464467 |
| 0.7099889558204673 | 0.0408714973407786 | 0.4870004137868226 |
| 0.1892746310771096 | 0.0635966207376912 | 0.5022841096519148 |
| 0.8540080238989487 | 0.3984874445107707 | 0.3459853480508241 |
| 0.5180741376944142 | 0.7342584445131772 | 0.6811716446432518 |
| 0.3808230837781021 | 0.3684669247142939 | 0.3258460690286352 |
| 0.0455196247017053 | 0.7045195571692677 | 0.6648544067343056 |
| 0.4588787787659773 | 0.5683960046087045 | 0.4904143382723086 |
| 0.4335590854216582 | 0.0240159965538574 | 0.5016920775463561 |
| 0.0990775827843740 | 0.3536593645530834 | 0.3467185425164654 |
| 0.7837457255117085 | 0.7018848781637245 | 0.6787757759852868 |
| 0.1292446707216278 | 0.9103937551483745 | 0.3237623332940164 |
| 0.7950314724670914 | 0.2416473143191957 | 0.6674391110733696 |
| 0.7000736245809431 | 0.2994693491931076 | 0.4982775871353329 |
| 0.6993573208043496 | 0.7997064590506716 | 0.5018880009638192 |
| 0.1986091141936039 | 0.2980954294729269 | 0.4983132093889959 |
| 0.1994074644395150 | 0.7995625503040094 | 0.4988572926779841 |
| 0.8692048224508171 | 0.1275062335818968 | 0.3344172230492998 |
| 0.5208566378647230 | 0.4455891812251597 | 0.6524383090167090 |
| 0.3722351363418736 | 0.6417455894009155 | 0.3369750348352192 |
| 0.0295392842074096 | 0.9596818870517052 | 0.6639627851203147 |
| 0.3656984257865190 | 0.1322930499269178 | 0.3122692617510241 |
| 0.0329131610998806 | 0.4662772689964806 | 0.6847260190599789 |
| 0.8552694821804998 | 0.6282614930888543 | 0.3358783201804200 |
| 0.5415012318109682 | 0.9751696732290687 | 0.6639771473947026 |
| 0.5872580793616456 | 0.6039250216534167 | 0.7526165161662453 |
| 0.5881321526368024 | 0.7368700421450056 | 0.7844047958613570 |

### The perfect Ni<sub>11</sub>-H<sub>2</sub>O\* surface

O In Ni In H

|                     |                     |                     |  |  |
|---------------------|---------------------|---------------------|--|--|
| 1.000000000000000   |                     |                     |  |  |
| 14.4442996979000000 | 0.0000000000000000  | 0.0000000000000000  |  |  |
| -7.2221498489000000 | 12.5091304781999995 | 0.0000000000000000  |  |  |
| 0.0000000000000000  | 0.0000000000000000  | 17.9855003356999994 |  |  |

|    |    |    |    |   |
|----|----|----|----|---|
| O  | In | Ni | In | H |
| 72 | 41 | 1  | 6  | 2 |

Direct

|                    |                    |                    |
|--------------------|--------------------|--------------------|
| 0.8399886306229825 | 0.6131128915850588 | 0.4561618668699216 |
| 0.5152190971124784 | 0.9523087720281901 | 0.2871175502478772 |
| 0.1724366792282934 | 0.2809347703808429 | 0.6195938124919229 |
| 0.7917584438287985 | 0.9611957359824788 | 0.2970904596634557 |
| 0.4682124606884677 | 0.2907908602840087 | 0.6438560442647473 |
| 0.1340786190274805 | 0.6264894431376611 | 0.4687808268292545 |
| 0.3002706192619881 | 0.7305662876587349 | 0.2988821875087092 |
| 0.9750577820721066 | 0.0692768636897007 | 0.6354395145509455 |
| 0.6403635906958205 | 0.4050332992541128 | 0.4645734088152565 |
| 0.5292191344548344 | 0.2103725445764359 | 0.2666911799149911 |
| 0.1862514720117586 | 0.5404011986280342 | 0.6097730572665404 |
| 0.8561889268918262 | 0.8832305809457707 | 0.4402464799722376 |
| 0.8853256182839221 | 0.1287553150921981 | 0.4557642212245102 |
| 0.5470415969497148 | 0.4629813905121566 | 0.2886707267507879 |
| 0.2174772749703991 | 0.7914419313819057 | 0.6192976932750772 |
| 0.5384889228336247 | 0.7315708912900504 | 0.2978827857189643 |
| 0.2055945914749127 | 0.0777001352785647 | 0.6577211012193294 |
| 0.8741999491841632 | 0.4065476062335444 | 0.4676453943843563 |
| 0.7679356865926193 | 0.4687538106803906 | 0.2982454841805915 |
| 0.4244949312112433 | 0.8092069466922059 | 0.6319202097781235 |
| 0.0927336514472137 | 0.1339184254752129 | 0.4626839918895186 |
| 0.2896135880092927 | 0.2196216969786785 | 0.2672326106276009 |
| 0.9577271570902051 | 0.5428744001974763 | 0.6088893103865367 |
| 0.6159604108437967 | 0.8728013682555550 | 0.4413821608476444 |
| 0.3741318059486731 | 0.6586034983427130 | 0.4574006314318272 |
| 0.0356579468426628 | 0.9836459700913724 | 0.2867527324763118 |
| 0.7068642502382125 | 0.3317525656510454 | 0.6188355442423022 |
| 0.7666860436721974 | 0.7069566790155362 | 0.2977003692223373 |
| 0.4211355706684787 | 0.0300427734991308 | 0.6587936653404515 |
| 0.0913633675096548 | 0.3654192031513039 | 0.4683203735974686 |
| 0.0300368407642148 | 0.1985409809369081 | 0.2983768806116073 |
| 0.6835130628198819 | 0.5331849874160850 | 0.6430145373522481 |
| 0.3640642813232780 | 0.8599606977858305 | 0.4621375221973788 |
| 0.2795642332714077 | 0.9700757411834087 | 0.2658428835619985 |
| 0.9569809896251822 | 0.3156508068154089 | 0.6108070942161977 |

|                    |                    |                    |
|--------------------|--------------------|--------------------|
| 0.6252831119501772 | 0.6439409033799821 | 0.4424492591983298 |
| 0.2265440579497364 | 0.3171481338153943 | 0.3772975178064699 |
| 0.8877818202102868 | 0.6437899894557786 | 0.7114570860095107 |
| 0.5565579639376554 | 0.9874665042916423 | 0.5422317678363220 |
| 0.2678248669361743 | 0.9760403051486075 | 0.5299839077776470 |
| 0.9277988502526375 | 0.3058018449938837 | 0.3436206129011439 |
| 0.6000195268618047 | 0.6597489871323954 | 0.7572006266617594 |
| 0.7591312241580451 | 0.1957516815145640 | 0.5355079494276874 |
| 0.4229523839312129 | 0.5284478296652588 | 0.3650439326781286 |
| 0.0958988472921399 | 0.8654117853968860 | 0.6976853713128095 |
| 0.5465332423402600 | 0.7154475712513565 | 0.5627983721089879 |
| 0.2148242118259861 | 0.0587273354446846 | 0.3850251763800922 |
| 0.8703846453340122 | 0.3897118784503800 | 0.7280867099769270 |
| 0.1814645165202631 | 0.8097447800213219 | 0.3768270554355134 |
| 0.8529757879283484 | 0.1378302096822120 | 0.7102209212673659 |
| 0.5139766195153799 | 0.4683567011429497 | 0.5427424356094067 |
| 0.5260605175774928 | 0.1899547926865044 | 0.5284363754592747 |
| 0.1945882543768714 | 0.5221966910754730 | 0.3491912078603807 |
| 0.8571175330380737 | 0.8654969117852054 | 0.7028937412392704 |
| 0.3042259375860156 | 0.4632103996226090 | 0.5332627685677425 |
| 0.9700926360310189 | 0.7935536618401876 | 0.3625762009662414 |
| 0.6335899349943883 | 0.1349376637487474 | 0.6987450730267893 |
| 0.7850870194389025 | 0.7282137211883698 | 0.5574943205902225 |
| 0.4385156693325609 | 0.0556620465531362 | 0.3842362836087069 |
| 0.1137702387373022 | 0.3825615587128000 | 0.7282778067548833 |
| 0.6898130474053740 | 0.2720769162559732 | 0.3771230043404404 |
| 0.3637809944996347 | 0.6174233788623832 | 0.7113118584524946 |
| 0.0290154548350082 | 0.9424500044975169 | 0.5425025423257115 |
| 0.3047116362462980 | 0.2300710647462124 | 0.5282935406441615 |
| 0.9770325643323957 | 0.5717953370773359 | 0.3481440275332048 |
| 0.6291217855612424 | 0.8959421391248288 | 0.7030694566560221 |
| 0.0349893808741339 | 0.7405283917018097 | 0.5326407060417718 |
| 0.7043787651082049 | 0.0763032634067884 | 0.3642431671760392 |
| 0.3805975213164262 | 0.4065782578858768 | 0.6924477604097287 |
| 0.7723408637579869 | 0.9565957189261625 | 0.5580346973925220 |
| 0.4434886946038191 | 0.2826918778788400 | 0.3866255621984759 |
| 0.1175580658141976 | 0.6275184329668752 | 0.7285763835672552 |
| 0.1393258421129052 | 0.1452692959695251 | 0.3295780040009805 |
| 0.8093062749474831 | 0.4803032484101428 | 0.6734121757841653 |
| 0.5980048322586832 | 0.6230656828995190 | 0.3216279804026706 |
| 0.2542367471777894 | 0.9553573732914505 | 0.6522328040957845 |
| 0.9252236527095437 | 0.2906129223107818 | 0.4948817388432317 |
| 0.4691544953737101 | 0.8124219932618008 | 0.5097734544692486 |
| 0.3530332536333848 | 0.8940700997154558 | 0.3286400841581824 |

|                    |                    |                    |
|--------------------|--------------------|--------------------|
| 0.0199051256594791 | 0.2311172883461981 | 0.6746816077328910 |
| 0.8754496241961840 | 0.8755686617568568 | 0.3196077412853823 |
| 0.5449704334806638 | 0.2011827591450911 | 0.6505018133393408 |
| 0.2091056319197955 | 0.5341082230480929 | 0.4929200459356294 |
| 0.6872375412695265 | 0.5579667370516667 | 0.5138219131314893 |
| 0.6050049161751512 | 0.3594132806725499 | 0.3308070102280239 |
| 0.2658462843359605 | 0.6869082018354709 | 0.6727796820675618 |
| 0.6236959676758222 | 0.9008373361025028 | 0.3203402264124335 |
| 0.2983590682489359 | 0.2447199012269222 | 0.6509838156644713 |
| 0.9645680882160198 | 0.5742802897201831 | 0.4924569034855625 |
| 0.9404710078092751 | 0.0304373327515943 | 0.5115975225808403 |
| 0.9315950505689434 | 0.7903435704916278 | 0.4841915133997871 |
| 0.4730036976769368 | 0.3063955461942557 | 0.5030575854907742 |
| 0.1446151726844139 | 0.6455660228342770 | 0.3469454711691367 |
| 0.8002135200264331 | 0.9780011519075226 | 0.6771553446331978 |
| 0.5875364500865654 | 0.1187593078421397 | 0.3224755113664598 |
| 0.2636532959215517 | 0.4540706043088936 | 0.6636775331425651 |
| 0.7099312715028662 | 0.0422177077051102 | 0.4862837080212729 |
| 0.1894622619751883 | 0.0639662767506962 | 0.5004351228287459 |
| 0.8539112397713200 | 0.3988033315431622 | 0.3457649342539096 |
| 0.5140878996261360 | 0.7358946594886482 | 0.6747091767486320 |
| 0.3808799363717871 | 0.3689133701701380 | 0.3244324123478706 |
| 0.0470421592059198 | 0.7044061723438945 | 0.6636526299330863 |
| 0.4589105223779473 | 0.5675448380631865 | 0.4881864329252818 |
| 0.4338784542231088 | 0.0257344653689741 | 0.4995195716330139 |
| 0.0997876582080135 | 0.3543312558933536 | 0.3464304710292084 |
| 0.7913505641181285 | 0.7026289860862129 | 0.6738865633713733 |
| 0.1295323580262269 | 0.9111258009064278 | 0.3217310702611178 |
| 0.7951541149437795 | 0.2411805265505849 | 0.6657018113617871 |
| 0.6998901703417524 | 0.3003777811026626 | 0.4978675664238978 |
| 0.7004285873340228 | 0.8007806169528898 | 0.4989378223659450 |
| 0.1988950645685522 | 0.2981484882916014 | 0.4980031836427753 |
| 0.1998619271630007 | 0.8009777341926805 | 0.4979363827158215 |
| 0.8692688756675534 | 0.1281260777839804 | 0.3340058727120924 |
| 0.5209398431436746 | 0.4466633616143175 | 0.6515439445207707 |
| 0.3723662094548978 | 0.6421067476507494 | 0.3354594326085568 |
| 0.0299352955908579 | 0.9599984585415181 | 0.6640385362572843 |
| 0.3660170720973604 | 0.1331770579086779 | 0.3098846864439405 |
| 0.0333525493467351 | 0.4655284747957693 | 0.6842570242676896 |
| 0.8556126631487897 | 0.6289024237583181 | 0.3345573877510129 |
| 0.5398864856751600 | 0.9750443914805520 | 0.6634840181653757 |
| 0.5413185839890075 | 0.5877154424364278 | 0.7678521360503829 |
| 0.6198453967244947 | 0.6970930480697090 | 0.8046000755725047 |

### The perfect Rh<sub>11</sub> doped c-In<sub>2</sub>O<sub>3</sub>(111) surface

O In Rh In

|                     |                     |                     |  |
|---------------------|---------------------|---------------------|--|
| 1.000000000000000   |                     |                     |  |
| 14.4442996979000000 | 0.0000000000000000  | 0.0000000000000000  |  |
| -7.2221498489000000 | 12.5091304781999995 | 0.0000000000000000  |  |
| 0.0000000000000000  | 0.0000000000000000  | 17.9855003356999994 |  |

|    |    |    |    |
|----|----|----|----|
| O  | In | Rh | In |
| 72 | 41 | 1  | 6  |

Direct

|                    |                    |                    |
|--------------------|--------------------|--------------------|
| 0.8429951473932705 | 0.6133972114326701 | 0.4561902481338506 |
| 0.5153837125177070 | 0.9524656281671411 | 0.2897957095500316 |
| 0.1727929364298390 | 0.2829879863282423 | 0.6207951087330127 |
| 0.7925994406385073 | 0.9609994036266417 | 0.2973752208017680 |
| 0.4748852646018101 | 0.3017801928317078 | 0.6422725821377420 |
| 0.1333812393427218 | 0.6255436086643706 | 0.4693358965134689 |
| 0.3012435451415245 | 0.7318723379579103 | 0.3004758096818688 |
| 0.9768384163407973 | 0.0701917722068007 | 0.6366467552976952 |
| 0.6399348302272000 | 0.4055565940899382 | 0.4657154654173203 |
| 0.5286276535652854 | 0.2103694073952572 | 0.2710546874064632 |
| 0.1858495959509545 | 0.5409421115919704 | 0.6107997355643318 |
| 0.8563904408833064 | 0.8831129749616604 | 0.4409601373536490 |
| 0.8866022051921411 | 0.1286714843355470 | 0.4564617604860166 |
| 0.5465714146394686 | 0.4623256833948280 | 0.2900430630565314 |
| 0.2183750858182271 | 0.7919053863881433 | 0.6211100086959781 |
| 0.5389722764013802 | 0.7313456188375645 | 0.2988923094810655 |
| 0.2062486085256843 | 0.0788314826220250 | 0.6520280045489706 |
| 0.8747736916179333 | 0.4079974519103214 | 0.4691480952566515 |
| 0.7674796236381790 | 0.4688058131366685 | 0.3002182025484047 |
| 0.4287639458590853 | 0.8062416839100742 | 0.6358590672432015 |
| 0.0933711804662652 | 0.1347425372654562 | 0.4654448931925586 |
| 0.2899890286377668 | 0.2188511055786559 | 0.2710488134317495 |
| 0.9591554658032874 | 0.5435315904512741 | 0.6108068375727201 |
| 0.6176067694279991 | 0.8739325745340571 | 0.4414716880362485 |
| 0.3717222157358739 | 0.6587512709576266 | 0.4573025134437406 |
| 0.0367949332417921 | 0.9844498264720813 | 0.2894561491647350 |
| 0.7091211365933707 | 0.3282502928711437 | 0.6207351887508274 |
| 0.7670070655439861 | 0.7066744628041853 | 0.2993164531571839 |
| 0.4223833061844050 | 0.0306693457164128 | 0.6550880949487747 |
| 0.0922254345336202 | 0.3671003531551372 | 0.4693355562420617 |
| 0.0306794432525634 | 0.1990073705907301 | 0.2996725615138608 |
| 0.6925439147884522 | 0.5246886277160335 | 0.6351213712662371 |
| 0.3647859419188590 | 0.8593327203780067 | 0.4655877798943538 |
| 0.2810404490987748 | 0.9711214940293706 | 0.2704646466261804 |
| 0.9563083019026555 | 0.3155472120783909 | 0.6110636144856771 |

|                    |                    |                    |
|--------------------|--------------------|--------------------|
| 0.6244407525665424 | 0.6400326508201228 | 0.4434590314561608 |
| 0.2262569947276750 | 0.3176845334963214 | 0.3789312000556671 |
| 0.8839218500715040 | 0.6472264596726283 | 0.7089530506893856 |
| 0.5583091262692337 | 0.9867120732033398 | 0.5440554897284493 |
| 0.2673228268940838 | 0.9750863305876069 | 0.5307404932679056 |
| 0.9281588039880855 | 0.3060975522152137 | 0.3466280369310082 |
| 0.5988042332631575 | 0.6266988276711852 | 0.6965545309853336 |
| 0.7594939127923984 | 0.1949687856370904 | 0.5346840238243461 |
| 0.4231292885703714 | 0.5288407913338599 | 0.3665594121941643 |
| 0.0988986535735173 | 0.8684130276694969 | 0.7003604999657480 |
| 0.5438678378363847 | 0.7184428613718994 | 0.5586462315861183 |
| 0.2146832397963825 | 0.0589656205512315 | 0.3893044576531812 |
| 0.8710388768249114 | 0.3899804805465828 | 0.7294155120163611 |
| 0.1817684847224708 | 0.8091558955213012 | 0.3793174911880723 |
| 0.8520842459360478 | 0.1366590879353481 | 0.7099478075329112 |
| 0.5182405736461537 | 0.4732491081905720 | 0.5516719605254288 |
| 0.5266775333920874 | 0.1908399631318956 | 0.5303034961511435 |
| 0.1945025631606438 | 0.5222767187744615 | 0.3473496407380124 |
| 0.8584552929836293 | 0.8659046664111875 | 0.7022012013311323 |
| 0.3062885463102140 | 0.4643247664730273 | 0.5339743813395774 |
| 0.9706375151387784 | 0.7935871799306624 | 0.3637139598229615 |
| 0.6319928829117084 | 0.1315676362356842 | 0.6996356735899339 |
| 0.7846541845481260 | 0.7281631535062996 | 0.5579618175298204 |
| 0.4402794237252555 | 0.0557961152447861 | 0.3889272281137905 |
| 0.1113047600270585 | 0.3816557086340674 | 0.7295622747532601 |
| 0.6909743012295242 | 0.2727851184394678 | 0.3792662487096434 |
| 0.3616201017024253 | 0.6158270558672391 | 0.7120097711057978 |
| 0.0280510493385237 | 0.9415641970763267 | 0.5437771373296841 |
| 0.3062415406159445 | 0.2333813580223908 | 0.5291887093573678 |
| 0.9779681706039044 | 0.5716413572921047 | 0.3459518360875399 |
| 0.6306867148493005 | 0.8902522740422213 | 0.7021895617375691 |
| 0.0356207791130773 | 0.7410280018081588 | 0.5344770873530394 |
| 0.7062025681001977 | 0.0771555797868084 | 0.3642727723904539 |
| 0.3774011081439462 | 0.4060488329635064 | 0.6948562645632846 |
| 0.7738102881693495 | 0.9567796780128356 | 0.5587449564177704 |
| 0.4439771166097983 | 0.2848848773042247 | 0.3908575628329143 |
| 0.1183109302188118 | 0.6290200299857513 | 0.7292441599836236 |
| 0.1396424919806153 | 0.1453922623528415 | 0.3331631911366643 |
| 0.8113207880032700 | 0.4813894074177609 | 0.6746565773826899 |
| 0.5979608546739038 | 0.6223127686722049 | 0.3227066337627182 |
| 0.2549651811445419 | 0.9555405993610130 | 0.6524967045362056 |
| 0.9252716451979202 | 0.2905779786888026 | 0.4950044361320009 |
| 0.4700000768299258 | 0.8113172094908476 | 0.5134219430941680 |
| 0.3541208559567939 | 0.8944031956527362 | 0.3330467997868302 |

|                    |                    |                    |
|--------------------|--------------------|--------------------|
| 0.0189496085539058 | 0.2308783569202580 | 0.6748629874160872 |
| 0.8761529167222010 | 0.8754790754042387 | 0.3211149621017012 |
| 0.5463498767026250 | 0.2022733567229618 | 0.6513887010582613 |
| 0.2100005607009008 | 0.5349382017893778 | 0.4947622071892209 |
| 0.6922188735293181 | 0.5598100061128379 | 0.5141152490309651 |
| 0.6049492493001219 | 0.3598717331898057 | 0.3342872384833249 |
| 0.2689473540776652 | 0.6884589122766391 | 0.6747059050625013 |
| 0.6245202786125366 | 0.9009985050646687 | 0.3213525333723184 |
| 0.2996245816479188 | 0.2470629025594613 | 0.6507734796531959 |
| 0.9658260185309969 | 0.5749014639380126 | 0.4950576217793827 |
| 0.9405121470027337 | 0.0300673188596211 | 0.5133773070098983 |
| 0.9308739831143411 | 0.7898127588128953 | 0.4864371487224187 |
| 0.4751273366175264 | 0.3085921310227396 | 0.5076782010874239 |
| 0.1451692933705522 | 0.6456292157128423 | 0.3476417938325601 |
| 0.8000792043882947 | 0.9755468399506306 | 0.6789160329223366 |
| 0.5879035238714042 | 0.1188282908356631 | 0.3255196120030451 |
| 0.2623221290232307 | 0.4555149604453591 | 0.6668419113063714 |
| 0.7108244409546787 | 0.0412482000064402 | 0.4869956841464946 |
| 0.1898979652957897 | 0.0652172936016212 | 0.5053989194761760 |
| 0.8544373675050211 | 0.3995669658748056 | 0.3474001890791483 |
| 0.5215695676683658 | 0.7208406460791870 | 0.6783535505617526 |
| 0.3809381296459554 | 0.3689219600148604 | 0.3267922321354474 |
| 0.0453737854035895 | 0.7057139502926871 | 0.6663573192061862 |
| 0.4598167221627487 | 0.5706953836299720 | 0.4898244165207755 |
| 0.4347750988114435 | 0.0248176210327387 | 0.5046975620261469 |
| 0.1002139428883755 | 0.3549846132942823 | 0.3474443759895096 |
| 0.7723688666032030 | 0.6965996058774853 | 0.6778003972714985 |
| 0.1306085893000542 | 0.9119734164863227 | 0.3253854711060145 |
| 0.7947237962973652 | 0.2403389945971010 | 0.6667998753323442 |
| 0.7004938053492775 | 0.3004349349217282 | 0.4996659838329079 |
| 0.7004310922842429 | 0.8001154226458862 | 0.5001179941688061 |
| 0.1990654055619178 | 0.2995693088226060 | 0.4995465133084233 |
| 0.2002267794091006 | 0.8003553238278753 | 0.5001405620412009 |
| 0.8702846479552967 | 0.1277998352495215 | 0.3351808758397812 |
| 0.5325265881167729 | 0.4681259364309731 | 0.6616111566308273 |
| 0.3724411175812888 | 0.6423244489378150 | 0.3363211966159339 |
| 0.0266152003269709 | 0.9563816401295937 | 0.6650388843188531 |
| 0.3664228795476444 | 0.1333742746833805 | 0.3157415388197700 |
| 0.0337543385470123 | 0.4667287333511924 | 0.6848404985661429 |
| 0.8574212369497271 | 0.6293880565814756 | 0.3350440941846698 |
| 0.5423592460549974 | 0.9701530336213131 | 0.6653525174854049 |

### The perfect Rh<sub>11</sub>-O<sub>V6</sub> surface

O In Rh In

|                     |                     |                     |  |
|---------------------|---------------------|---------------------|--|
| 1.000000000000000   |                     |                     |  |
| 14.4442996979000000 | 0.0000000000000000  | 0.0000000000000000  |  |
| -7.2221498489000000 | 12.5091304781999995 | 0.0000000000000000  |  |
| 0.0000000000000000  | 0.0000000000000000  | 17.9855003356999994 |  |

|    |    |    |    |
|----|----|----|----|
| O  | In | Rh | In |
| 71 | 41 | 1  | 6  |

Direct

|                    |                    |                    |
|--------------------|--------------------|--------------------|
| 0.8427777684636694 | 0.6135718203946008 | 0.4565295542072229 |
| 0.5157375022519645 | 0.9527075198526506 | 0.2892253620154666 |
| 0.1719467619636791 | 0.2821057368789276 | 0.6203171239907171 |
| 0.7923678369038203 | 0.9611679770924947 | 0.2978859950645423 |
| 0.4719226958093884 | 0.2986176468958281 | 0.6445570895835689 |
| 0.1333545729425302 | 0.6252596445099655 | 0.4689414462823938 |
| 0.3015538352501349 | 0.7315958181516916 | 0.3002398263182890 |
| 0.9766828695861812 | 0.0702161173969803 | 0.6364960041233373 |
| 0.6396903814163595 | 0.4058304265475335 | 0.4665944071386756 |
| 0.5288712432383547 | 0.2102864039492238 | 0.2702167486793590 |
| 0.1850649308309623 | 0.5402799428472359 | 0.6107888253330284 |
| 0.8568726678423834 | 0.8832904013148261 | 0.4408118772403191 |
| 0.8865256264720185 | 0.1292959864100406 | 0.4568071939521064 |
| 0.5465990180725178 | 0.4624037302905832 | 0.2897763377720683 |
| 0.2192578491229082 | 0.7908168649683724 | 0.6203583795613170 |
| 0.5390826447440550 | 0.7312559981965683 | 0.2992542470286573 |
| 0.2051352432075625 | 0.0761742077936473 | 0.6537186397704294 |
| 0.8749293358130544 | 0.4078401162691909 | 0.4687625933004596 |
| 0.7674095317528585 | 0.4688108761061728 | 0.3001637162376705 |
| 0.4297563381566970 | 0.8050619307479829 | 0.6360631888081726 |
| 0.0935720691011402 | 0.1343669653322256 | 0.4647773133490885 |
| 0.2901335935114138 | 0.2190467068154560 | 0.2703530754632840 |
| 0.9584980110631459 | 0.5432683476271386 | 0.6106906380139734 |
| 0.6172302469223185 | 0.8736721544357641 | 0.4419478476462398 |
| 0.3719940091642984 | 0.6582438194435156 | 0.4579498175736998 |
| 0.0367814960307436 | 0.9840762894753514 | 0.2885781805569070 |
| 0.7076244175079339 | 0.3310299594291494 | 0.6204898351088796 |
| 0.7672839544594979 | 0.7068205781005277 | 0.2990478648605808 |
| 0.4222216877443682 | 0.0296712896638579 | 0.6571648083047708 |
| 0.0921141591231296 | 0.3667400064965931 | 0.4691383073684015 |
| 0.0304412675026329 | 0.1986345093582270 | 0.2997656760499223 |
| 0.6887064111518826 | 0.5316464245688872 | 0.6394600086175413 |
| 0.3653458692373874 | 0.8593416534207602 | 0.4649661105536204 |
| 0.2809954796098194 | 0.9708122584426454 | 0.2692019627089002 |
| 0.9562869855643188 | 0.3161960331908199 | 0.6114701193449241 |



|                    |                    |                    |
|--------------------|--------------------|--------------------|
| 0.6250737057047809 | 0.6402703656169842 | 0.4436236516061423 |
| 0.2264887617386884 | 0.3176467222437381 | 0.3785675680645683 |
| 0.8859667585157978 | 0.6465966596768152 | 0.7093005538121779 |
| 0.5578857191154090 | 0.9868461744519271 | 0.5443563269666069 |
| 0.2679179038348295 | 0.9750200961752171 | 0.5308487664388073 |
| 0.9280169057324513 | 0.3060601216433636 | 0.3454320848132559 |
| 0.7593009454586092 | 0.1957422481293483 | 0.5355815984971448 |
| 0.4234154929853172 | 0.5286789348959476 | 0.3667847155617591 |
| 0.0985367777347132 | 0.8665960233405346 | 0.6995194228260667 |
| 0.5457978950917262 | 0.7173578096909603 | 0.5595038961550604 |
| 0.2148989869790528 | 0.0586966413012411 | 0.3880438376305858 |
| 0.8702601246201853 | 0.3904727764307864 | 0.7294763634225484 |
| 0.1821873386428225 | 0.8092198425164469 | 0.3785816841139921 |
| 0.8526434487191621 | 0.1378322444096693 | 0.7106098166948932 |
| 0.5174835842846971 | 0.4725042934878911 | 0.5504288550721399 |
| 0.5260722557908035 | 0.1905256630577600 | 0.5310005966416443 |
| 0.1946417802444887 | 0.5220927491623487 | 0.3471603029169109 |
| 0.8605204499676232 | 0.8679685332952696 | 0.7032209486843908 |
| 0.3060515564702077 | 0.4635487535976287 | 0.5345304399762512 |
| 0.9709953961363690 | 0.7937334273717975 | 0.3635625074442260 |
| 0.6328617402325762 | 0.1330961660559993 | 0.6995894579260007 |
| 0.7863118567971563 | 0.7292694445861265 | 0.5580097616207335 |
| 0.4399216886004481 | 0.0558292746342937 | 0.3880146977268767 |
| 0.1109272872653887 | 0.3812233603148376 | 0.7299143336927462 |
| 0.6904555135310848 | 0.2730429193310374 | 0.3792574113969144 |
| 0.3615863861407261 | 0.6136497019105102 | 0.7115647117397265 |
| 0.0287994918737678 | 0.9419658021752951 | 0.5435469845682150 |
| 0.3058179157673046 | 0.2318861859680188 | 0.5295708992087680 |
| 0.9780219682287858 | 0.5717756295674061 | 0.3453162679081038 |
| 0.6314850395984181 | 0.8931350563094371 | 0.7029919697319000 |
| 0.0363364227230067 | 0.7409660528694204 | 0.5340724625568546 |
| 0.7056890277299332 | 0.0770945919286259 | 0.3651219346917904 |
| 0.3724005519790802 | 0.4001809987497894 | 0.6972764653193307 |
| 0.7739871439574477 | 0.9569385987196407 | 0.5587593236982601 |
| 0.4439489684728427 | 0.2844256841624034 | 0.3901815510001690 |
| 0.1189395886800259 | 0.6285182641937221 | 0.7294632087183874 |
| 0.1395850820854472 | 0.1451770291166907 | 0.3321677830662689 |
| 0.8100844738891646 | 0.4814835054869299 | 0.6746354249818852 |
| 0.5983334274154574 | 0.6223832498067856 | 0.3227746436491284 |
| 0.2551364921520969 | 0.9538574078391033 | 0.6526578563318400 |
| 0.9253511504850883 | 0.2908743014289478 | 0.4955362333791848 |
| 0.4701486291802949 | 0.8113239754774024 | 0.5135057679548007 |
| 0.3542624738895459 | 0.8943351191888173 | 0.3318973132400861 |
| 0.0184513885442752 | 0.2307379218419179 | 0.6750940078622575 |

|                    |                    |                    |
|--------------------|--------------------|--------------------|
| 0.8762231738469799 | 0.8756898135868052 | 0.3207124737387854 |
| 0.5457246147739269 | 0.2016018174694450 | 0.6523705088798770 |
| 0.2096694850763743 | 0.5345112249641040 | 0.4947914163980727 |
| 0.6917494917352033 | 0.5600749207609721 | 0.5147445408514852 |
| 0.6048840562992337 | 0.3596822061748922 | 0.3334213829334357 |
| 0.2692658127081751 | 0.6876432436170282 | 0.6746435945927085 |
| 0.6242633434209640 | 0.9009409219474958 | 0.3216931873831101 |
| 0.2957638223098391 | 0.2426384455171889 | 0.6511000083920319 |
| 0.9657965136157096 | 0.5747606033723426 | 0.4948508340064682 |
| 0.9408170975563301 | 0.0304898232168113 | 0.5132272720185520 |
| 0.9324055373573175 | 0.7904610810802902 | 0.4857064666669817 |
| 0.4744154157518639 | 0.3074742454777424 | 0.5069291197977256 |
| 0.1452077622163920 | 0.6453999728789510 | 0.3472201981018897 |
| 0.8003474004627550 | 0.9769984019450990 | 0.6789899649221288 |
| 0.5880446090318967 | 0.1189441705057559 | 0.3252315815246100 |
| 0.2603033954809604 | 0.4540555275313377 | 0.6663305728084666 |
| 0.7106582176832359 | 0.0417699599583724 | 0.4876294645895606 |
| 0.1899383690520718 | 0.0641473687648767 | 0.5038043123624697 |
| 0.8544881094655600 | 0.3995868255028718 | 0.3470364476496224 |
| 0.5218762166387844 | 0.7232153010181541 | 0.6783594013186953 |
| 0.3810390129980950 | 0.3688809172984870 | 0.3264257616133998 |
| 0.0471536467325443 | 0.7049999987284447 | 0.6656777529214397 |
| 0.4595049167997305 | 0.5702417539964018 | 0.4895769110375915 |
| 0.4350648006969581 | 0.0248470728563940 | 0.5036493931372502 |
| 0.0999997536348267 | 0.3547976979660317 | 0.3471434637519449 |
| 0.7819125604235814 | 0.7017944575169583 | 0.6765298640375507 |
| 0.1306497880896485 | 0.9115555207139719 | 0.3243214242967860 |
| 0.7948173280984009 | 0.2410954694890071 | 0.6672120866310948 |
| 0.7003548708976219 | 0.3007663391351594 | 0.4996865573421279 |
| 0.7012305146761686 | 0.8009060570831251 | 0.4995428506546614 |
| 0.1990421664634404 | 0.2990761385480666 | 0.4989736880196437 |
| 0.2008458083408938 | 0.8001058424498800 | 0.4994086476385100 |
| 0.8699123508188893 | 0.1280285693289767 | 0.3353733384455050 |
| 0.5218022371522241 | 0.4627503031525870 | 0.6606842912474120 |
| 0.3725154791272194 | 0.6421793090001059 | 0.3364887612037075 |
| 0.0287947823787274 | 0.9578595817716563 | 0.6649579695582896 |
| 0.3664614540020927 | 0.1331735726128545 | 0.3142895334669267 |
| 0.0331019723610721 | 0.4664004857635616 | 0.6855064917215827 |
| 0.8574329962302694 | 0.6293823468303489 | 0.3350427146333953 |
| 0.5419234700717921 | 0.9709862288932073 | 0.6659511784665635 |

### The perfect Rh<sub>11</sub>-O<sub>V6</sub>-bt-CO<sub>2</sub> surface

O In Rh In C O

1.000000000000000

14.4443000000000001 0.000000000000000 0.000000000000000

-7.22214999999999965 12.5091307398835685 0.000000000000000

0.00000000000000011 0.00000000000000019 17.9854999999999983

O In Rh In C O

71 41 1 6 1 2

Direct

0.8409254182705290 0.6141109757976276 0.4566997232364212

0.5154759116852123 0.9523995413900704 0.2893555489909997

0.1715436198788450 0.2815383497026996 0.6198272881301607

0.7928634230051611 0.9611350001112836 0.2976804189057740

0.4764842728302038 0.3048897331637569 0.6494015124954766

0.1341232416733504 0.6268079613739026 0.4698942754906651

0.3012431181532663 0.7318286303861326 0.3005778275405194

0.9763116984703287 0.0704049748298488 0.6362402764713632

0.6423632356256204 0.4054690216009255 0.4628467167112655

0.5295559382897921 0.2101436458261903 0.2690316499862253

0.1862340815929341 0.5424177199375199 0.6105240155137016

0.8566849551639083 0.8835986462853189 0.4410672838133952

0.8863487808383840 0.1288645856070233 0.4564386665172754

0.5482813656236226 0.4636361604019239 0.2900466180463086

0.2189946338636100 0.7929320087362129 0.6210521355768681

0.5394722159875924 0.7325863785747231 0.2982401168695180

0.2070629698718966 0.0796969195495593 0.6538073517677883

0.8748223042632989 0.4081154004968833 0.4688355575722058

0.7691091013969960 0.4692200576470732 0.2990040987696418

0.4283903134644270 0.8092825507376379 0.6362630733782909

0.0936328887464930 0.1347516769158483 0.4643510647761204

0.2899339047035530 0.2194316289003595 0.2691729000176171

0.9591629346175400 0.5444622680932688 0.6103618364833500

0.6167433127565577 0.8740453174090421 0.4423047981297302

0.3742708073873710 0.6592656422514344 0.4578592691728469

0.0368621308294608 0.9843812334756368 0.2887173488703554

0.7093325078572275 0.3303153127861923 0.6200010913402062

0.7677938468756955 0.7072157410511312 0.2980095704338644

0.4229757100385796 0.0332290238126195 0.6562618329846898

0.0918239961669857 0.3664300341906612 0.4691483956127556

0.0310016700216404 0.1993458567415992 0.2993584160396467

0.6936132456174978 0.5292174730085017 0.6354902123101775

0.3653700519670715 0.8603776287899353 0.4656403111797500

0.2812444898727846 0.9709934056446874 0.2693660251016644

0.9560979660652871 0.3163128083673468 0.6106682534019864

|                    |                    |                    |
|--------------------|--------------------|--------------------|
| 0.6263481417438557 | 0.6457851087666627 | 0.4421083886984840 |
| 0.2273072546587134 | 0.3179376951697742 | 0.3784914192052322 |
| 0.8872057063937863 | 0.6470187652305965 | 0.7111015774158731 |
| 0.5581829618103477 | 0.9880729424291280 | 0.5441363159001490 |
| 0.2677634436311648 | 0.9757564562379130 | 0.5307234852572709 |
| 0.9285830431723375 | 0.3062233244280698 | 0.3461771808169579 |
| 0.7590631819162617 | 0.1956716320267727 | 0.5345371095489014 |
| 0.4233287681793487 | 0.5293686156528880 | 0.3646230444989249 |
| 0.0988191730976422 | 0.8686917923991058 | 0.6995537071459578 |
| 0.5450675428033950 | 0.7171717101363030 | 0.5623184745774058 |
| 0.2154614857339141 | 0.0594591386484857 | 0.3878339133992709 |
| 0.8712958448357785 | 0.3906720456803387 | 0.7290504205565023 |
| 0.1824781904649211 | 0.8101463414780604 | 0.3790353370205793 |
| 0.8523175477565840 | 0.1377016089262650 | 0.7096582134938563 |
| 0.5131371646204850 | 0.4677577593586426 | 0.5402611632746489 |
| 0.5249815512528804 | 0.1931680956577171 | 0.5313064626108666 |
| 0.1948240967135885 | 0.5228314928549102 | 0.3493428546455839 |
| 0.8600644897289681 | 0.8674484993413570 | 0.7024194197255300 |
| 0.3040612919639814 | 0.4642796972954630 | 0.5337316035819735 |
| 0.9708339670574514 | 0.7938484833658025 | 0.3637078874208319 |
| 0.6328153968647982 | 0.1346482129153411 | 0.6998062849700738 |
| 0.7837862213363058 | 0.7284700965781513 | 0.5584134347614328 |
| 0.4408517451206043 | 0.0566271478557932 | 0.3881269706105095 |
| 0.1118796597259600 | 0.3827952146981473 | 0.7284440683742013 |
| 0.6914482802464467 | 0.2720726119450839 | 0.3781264770021569 |
| 0.3624291526058385 | 0.6171870238306976 | 0.7120558002800356 |
| 0.0288852654523727 | 0.9423370553202148 | 0.5434836642124030 |
| 0.3065376603426285 | 0.2317719154861860 | 0.5294298287819872 |
| 0.9781049130366127 | 0.5724753938386657 | 0.3483121435218553 |
| 0.6310571065982399 | 0.8934124046652264 | 0.7030230867762305 |
| 0.0356052319881387 | 0.7415339663890728 | 0.5340995112949525 |
| 0.7060734117042404 | 0.0765763651599149 | 0.3642421031513181 |
| 0.3731503233348453 | 0.4047118090661667 | 0.6934089584776761 |
| 0.7736281137219909 | 0.9574186690177932 | 0.5588578558507761 |
| 0.4439439499292158 | 0.2832817286352486 | 0.3873807615998687 |
| 0.1184566345625754 | 0.6293770045375909 | 0.7294400898049902 |
| 0.1402161867635242 | 0.1457660078592122 | 0.3317099973724468 |
| 0.8112459993924691 | 0.4817794255236283 | 0.6745513990083332 |
| 0.5987834206679918 | 0.6238431213697081 | 0.3219600597948253 |
| 0.2556453615689890 | 0.9568000182559443 | 0.6526815176206900 |
| 0.9252518190865312 | 0.2910132384639238 | 0.4946529546968667 |
| 0.4702226706409915 | 0.8118205638082671 | 0.5133790524025497 |
| 0.3544937405061812 | 0.8948898213552228 | 0.3324513725679074 |
| 0.0191748018794929 | 0.2317876639031557 | 0.6742349932293162 |

|                    |                    |                    |
|--------------------|--------------------|--------------------|
| 0.8763821338545221 | 0.8755234219406894 | 0.3207918900673118 |
| 0.5467571223855243 | 0.2058489326802627 | 0.6527269565081542 |
| 0.2098601180153580 | 0.5351498400717001 | 0.4939857383134923 |
| 0.6866599089409168 | 0.5578371133418122 | 0.5126762346351275 |
| 0.6061821070546716 | 0.3599010776604081 | 0.3322857189035510 |
| 0.2681808650247886 | 0.6888749227278795 | 0.6746877248975333 |
| 0.6247265794238878 | 0.9012557945623557 | 0.3214722643495503 |
| 0.3002541613324171 | 0.2475848475869382 | 0.6508565567839626 |
| 0.9650894145847134 | 0.5753402245090816 | 0.4942481642043163 |
| 0.9409997066018501 | 0.0305901357655981 | 0.5127931939464417 |
| 0.9305817995422928 | 0.7900456571089088 | 0.4860498925498285 |
| 0.4746063853013066 | 0.3104022684943260 | 0.5032872966702756 |
| 0.1454287023192193 | 0.6462739184198408 | 0.3482023355849315 |
| 0.8009934547696905 | 0.9771552269622136 | 0.6785662926126308 |
| 0.5882781789865252 | 0.1188309064243263 | 0.3244198805701918 |
| 0.2618841334245945 | 0.4556106575044277 | 0.6646413960952632 |
| 0.7107227103823333 | 0.0420251000668362 | 0.4869195429351238 |
| 0.1903268079032023 | 0.0652739046153238 | 0.5036404009703392 |
| 0.8548082786271817 | 0.3995796565105166 | 0.3471477080401722 |
| 0.5182525048971881 | 0.7283066477071024 | 0.6790354399287688 |
| 0.3817386640478591 | 0.3695714791858759 | 0.3250898209681272 |
| 0.0470232019448470 | 0.7063956751289000 | 0.6657109510302175 |
| 0.4593887838149830 | 0.5677232698357212 | 0.4888445868529540 |
| 0.4353407010751380 | 0.0269059583722507 | 0.5038717514402229 |
| 0.1007629101868340 | 0.3550856177792174 | 0.3475716815173670 |
| 0.7841198125387510 | 0.7014392950201732 | 0.6761319463599824 |
| 0.1307414733113688 | 0.9120978994994844 | 0.3245971209552229 |
| 0.7950217224146223 | 0.2416810982102065 | 0.6662473588819090 |
| 0.7000572748474637 | 0.3008413769406253 | 0.4989699259796510 |
| 0.7003527683972459 | 0.8011165821217696 | 0.5002665104034381 |
| 0.1994813608648704 | 0.2993373886575724 | 0.4991865696082430 |
| 0.2006431615314606 | 0.8012734166391310 | 0.4999339242613546 |
| 0.8705313514002018 | 0.1279737232810881 | 0.3349823197800286 |
| 0.5334799287528658 | 0.4678865089850156 | 0.6672235415010815 |
| 0.3732801368771743 | 0.6432023028975918 | 0.3363359283933544 |
| 0.0295720662200979 | 0.9597209790715489 | 0.6646655061824156 |
| 0.3669582064931263 | 0.1337706133673694 | 0.3132670852551041 |
| 0.0337234369157626 | 0.4672902825874535 | 0.6846697573244507 |
| 0.8567121348965353 | 0.6294229520952216 | 0.3352926274462668 |
| 0.5422078385557283 | 0.9742329674907052 | 0.6651728098895202 |
| 0.5708863858644577 | 0.5350437841304424 | 0.7616833648210999 |
| 0.5769813028220978 | 0.5374875055423701 | 0.8276888257612002 |
| 0.6023912444731756 | 0.6294039087506205 | 0.7117756791674339 |

**The perfect Rh<sub>11</sub>-O<sub>V6</sub>-[CO<sub>2</sub>+H]\* surface**

O In Rh In C O H

1.000000000000000

14.4443000000000001 0.000000000000000 0.000000000000000

-7.2221499999999965 12.5091307398835685 0.000000000000000

0.00000000000000011 0.00000000000000019 17.985499999999983

O In Rh In C O H

71 41 1 6 1 2 1

Direct

0.8418441607944394 0.6153884840261522 0.4568633488951508

0.5160854412487600 0.9547897709717266 0.2882841623906212

0.1702470534630502 0.2810785107459393 0.6178153139981457

0.7927033824835241 0.9631857398578687 0.2974519880007407

0.4751544070706087 0.3039394910541222 0.6446567843128590

0.1343541535091245 0.6288259191482219 0.4700588765652585

0.3010726971687085 0.7329054733310124 0.2996424746999265

0.9769499697946212 0.0732163293414176 0.6349474743746811

0.6399808061937962 0.4079375580269210 0.4668049110561986

0.5294814962934763 0.2125493843475764 0.2700556512793699

0.1975582921926662 0.5502298816878753 0.6106443755870130

0.8572767313335777 0.8855371208062660 0.4404502033071445

0.8865092295839547 0.1309810401444662 0.4565740025524401

0.5475336160045208 0.4644125376270332 0.2893179932026522

0.2191770953753782 0.7972488088850171 0.6197062869998798

0.5395516876091417 0.7333640385258233 0.2979759688509460

0.2068096455335432 0.0814657384371590 0.6588255907771631

0.8742850391988835 0.4093039735602373 0.4697578107805013

0.7679215620862763 0.4706651475109683 0.3002704022603656

0.4289100056403007 0.8013501868865077 0.6400830724149846

0.0932176410490185 0.1351103425295865 0.4621730090168851

0.2910788557705065 0.2214062619549579 0.2687027650290979

0.9617801906039481 0.5466073170056807 0.6108364356695916

0.6173106386655706 0.8762157866699390 0.4410747135358991

0.3734164762503378 0.6599494760044113 0.4566707092554583

0.0367451741929788 0.9856343598458046 0.2868099007710224

0.7097440965670634 0.3311197942698491 0.6215864096185867

0.7679061426014896 0.7089586555506914 0.2982115733854475

0.4226995755740035 0.0318936968578867 0.6591265495051596

0.0920118603531786 0.3683420473690491 0.4692852911392487

0.0301413367368288 0.2009406369807582 0.2984207812157449

0.6929647704337955 0.5264259046731988 0.6370279231451107

0.3648727907025854 0.8613375561410601 0.4658646623688046

0.2814089413647584 0.9726651891215443 0.2676390394046933

0.9579595750556312 0.3199715475416042 0.6112785450502861

|                    |                    |                    |
|--------------------|--------------------|--------------------|
| 0.6257521275476569 | 0.6437805200900434 | 0.4423272321076729 |
| 0.2262443966576583 | 0.3193127636370355 | 0.3767647947743829 |
| 0.8848793342327310 | 0.6496288315893259 | 0.7086738686858122 |
| 0.5561895643972872 | 0.9862025515504701 | 0.5458745020597950 |
| 0.2688019348544893 | 0.9793760565924994 | 0.5311527335973482 |
| 0.9278335938363310 | 0.3079273274005116 | 0.3461538582292872 |
| 0.7591297421470292 | 0.1965455413024720 | 0.5361111776333203 |
| 0.4236530841272418 | 0.5302713520419564 | 0.3658144054082043 |
| 0.0986662133650331 | 0.8701007519398186 | 0.6998078365724335 |
| 0.5438723440139216 | 0.7209128392248683 | 0.5577385635516131 |
| 0.2154721586415756 | 0.0607619093883869 | 0.3856731431722569 |
| 0.8733411105325901 | 0.3935072709602762 | 0.7301947537137821 |
| 0.1830045912653488 | 0.8122800439890194 | 0.3781047153967795 |
| 0.8543521007465962 | 0.1410019338093269 | 0.7110271115383681 |
| 0.5164250481076003 | 0.4765016632213126 | 0.5520668778007037 |
| 0.5253174628088481 | 0.1931803923884851 | 0.5317213839028223 |
| 0.1948556911835350 | 0.5244031651638154 | 0.3500628270397589 |
| 0.8605644278132719 | 0.8705139889310136 | 0.7024347909384996 |
| 0.3046215487070777 | 0.4641014710112035 | 0.5322852512188344 |
| 0.9714362483821107 | 0.7960541699241994 | 0.3637043659512115 |
| 0.633554686496161  | 0.1348908753719939 | 0.7007744982522208 |
| 0.7845406995352868 | 0.7300622615774074 | 0.5579885652717208 |
| 0.4398648525683876 | 0.0570604219213715 | 0.3874058078941625 |
| 0.1155182262763494 | 0.3864754474804497 | 0.7269159804934939 |
| 0.6900546608589686 | 0.2745560248944248 | 0.3799649649026375 |
| 0.3676816069622258 | 0.6163511709335197 | 0.7212910813649404 |
| 0.0300738928401471 | 0.9447999460795914 | 0.5434011230525480 |
| 0.3057948774957850 | 0.2330015246200220 | 0.5289302052760700 |
| 0.9779667614225284 | 0.5738513912329182 | 0.3485448458811813 |
| 0.6337203393437748 | 0.8977086453708135 | 0.7033546522520173 |
| 0.0356805467090487 | 0.7430900230826502 | 0.5343187194913883 |
| 0.7055952609098509 | 0.0790043873572366 | 0.3650216481390152 |
| 0.3721750200302070 | 0.4061449935721613 | 0.6923061485230122 |
| 0.7733321428767130 | 0.9582444235769750 | 0.5585831624900510 |
| 0.4440083859144790 | 0.2867517556168999 | 0.3902798307885205 |
| 0.1204254185537425 | 0.6324987735749088 | 0.7289297885971485 |
| 0.1396358828599321 | 0.1471061221763212 | 0.3292810910772185 |
| 0.8131558056822800 | 0.4838577951336984 | 0.6748960454040751 |
| 0.5989599516871481 | 0.6246181273608327 | 0.3215492179171078 |
| 0.2556284749692696 | 0.9599791662916891 | 0.6534229517369177 |
| 0.9249548940985256 | 0.2923263269944127 | 0.4952021815171796 |
| 0.4699392047540271 | 0.8127312383625505 | 0.5118314915646232 |
| 0.3545359839008118 | 0.8963713811836707 | 0.3301289922652386 |
| 0.0189500155779215 | 0.2331323872633793 | 0.6742107207116443 |

|                    |                    |                    |
|--------------------|--------------------|--------------------|
| 0.8765571791642649 | 0.8775429620293982 | 0.3200639323530153 |
| 0.5468349956112669 | 0.2038804040383709 | 0.6525882180219944 |
| 0.2107743051551695 | 0.5373559936294313 | 0.4914106564852012 |
| 0.6896130356209601 | 0.5616687935376985 | 0.5145886575238855 |
| 0.6051453179782826 | 0.3616647182119796 | 0.3337058315039365 |
| 0.2676475435435415 | 0.6961105245225110 | 0.6729138732458052 |
| 0.6246686420896735 | 0.9030267099261988 | 0.3207065696571532 |
| 0.2984857550362001 | 0.2470428796958582 | 0.6498337390452636 |
| 0.9656092197655994 | 0.5768991375916390 | 0.4939491813638030 |
| 0.9410104782783064 | 0.0322548646607579 | 0.5122413723352671 |
| 0.9311565348298002 | 0.7920732688572093 | 0.4861082969345948 |
| 0.4754161396392713 | 0.3135119037487703 | 0.5072266332982863 |
| 0.1453992336719283 | 0.6480896890680909 | 0.3477212968774672 |
| 0.8031383218412323 | 0.9806970730744097 | 0.6782451482134984 |
| 0.5884707754388839 | 0.1209794874715732 | 0.3248510585700603 |
| 0.2582568956883103 | 0.4507446818899520 | 0.6573498897333673 |
| 0.7102882111834519 | 0.0431195796289084 | 0.4875716633825734 |
| 0.1899816065259602 | 0.0659525126796208 | 0.5008605116607823 |
| 0.8539337410580512 | 0.4010825754171068 | 0.3476911038514898 |
| 0.5335575425881846 | 0.7323105996488766 | 0.6757187900458995 |
| 0.3817221689779856 | 0.3708769349858322 | 0.3253338561349689 |
| 0.0452442462590864 | 0.7093372766181225 | 0.6645815170869962 |
| 0.4606001573712754 | 0.5705287917966118 | 0.4887358665823756 |
| 0.4354330607188381 | 0.0276732256572329 | 0.5030334307643619 |
| 0.0994404134508273 | 0.3565440111155724 | 0.3467093530698688 |
| 0.7764057506231934 | 0.7021021908140544 | 0.6773638326330375 |
| 0.1305383678443013 | 0.9131680033590641 | 0.3224675652174305 |
| 0.7955415847798695 | 0.2434297030822460 | 0.6676296053942146 |
| 0.6999982629737679 | 0.3023823437689157 | 0.5003244716861658 |
| 0.7011798050211179 | 0.8026876218468577 | 0.4983998714584778 |
| 0.1981685442002020 | 0.2990050175850488 | 0.4964280536310091 |
| 0.2002956830083514 | 0.8041854562051024 | 0.4987703298284221 |
| 0.8697952598347712 | 0.1297522584539098 | 0.3349551646381293 |
| 0.5352577295925777 | 0.4675173684544088 | 0.6688979432861560 |
| 0.3735581997296870 | 0.6443373062432699 | 0.3354343951527692 |
| 0.0285575993336885 | 0.9606898488188116 | 0.6649715623929718 |
| 0.3669337688457084 | 0.1352638962479467 | 0.3132233875315497 |
| 0.0349267307283413 | 0.4698171732715553 | 0.6849347094975975 |
| 0.8571714920010762 | 0.6314549161429857 | 0.3353949917326859 |
| 0.5415570115184057 | 0.9732276571461888 | 0.6668845462010076 |
| 0.5528745418036427 | 0.4557802926207942 | 0.7687835763830028 |
| 0.5609927732312533 | 0.4493899229386141 | 0.8323038428829744 |
| 0.6048453724771247 | 0.6369979768517975 | 0.6959328931535961 |
| 0.3666807166468646 | 0.5960299496005680 | 0.7728707270927163 |



### The perfect Rh<sub>11</sub>-O<sub>V6</sub>-[CO+OH]\* surface

O In Rh In C O H

1.000000000000000

14.4443000000000001 0.000000000000000 0.000000000000000

-7.2221499999999965 12.5091307398835685 0.000000000000000

0.0000000000000011 0.0000000000000019 17.985499999999983

O In Rh In C O H

71 41 1 6 1 2 1

Direct

0.8418252568324881 0.6163146294470615 0.4573868814238930

0.5159156888029419 0.9552696845142644 0.2883795455750320

0.1722230257850309 0.2842486272581851 0.6189994040939172

0.7924037536013312 0.9634947738546200 0.2978574566138119

0.4760366167076469 0.3036936479495112 0.6426979721705047

0.1345071160069969 0.6292663928001241 0.4692414836254512

0.3012344158931422 0.7332391219163246 0.2998659036570501

0.9775434373639803 0.0730494377968271 0.6356197507097018

0.6399939629897686 0.4090434765741225 0.4674013566144128

0.5295548912898691 0.2134816095440269 0.2688818385344378

0.1867273499031895 0.5436879338160214 0.6096298428306813

0.8569547533078758 0.8852151358843356 0.4413861493728097

0.8865735301762911 0.1314327645479430 0.4562626559111340

0.5469973806866423 0.4653227998735480 0.2895554764645507

0.2199415307752503 0.7948570630182935 0.6200093101390107

0.5391282525047436 0.7337116377105346 0.2992800311551294

0.2075195919357443 0.0806069999387159 0.6579423197048554

0.8746554238209985 0.4097420183899762 0.4691995119557093

0.7676499906030928 0.4713028421580652 0.3001890463538973

0.4278573556606607 0.8112039765163626 0.6339752381676611

0.0939454300626656 0.1363240323036075 0.4632518323853456

0.2908432448140666 0.2221892430935684 0.2689978251984939

0.9608382631666017 0.5463252624403058 0.6103584401658538

0.6176123435299171 0.8767308518072536 0.4415624158109800

0.3735175898317336 0.6611698773467728 0.4583037690059509

0.0364037585501081 0.9861605250991421 0.2875898074820926

0.7097554075999273 0.3321621760985430 0.6214068402933194

0.7669939488694545 0.7092144111713602 0.2994269696925131

0.4234259082535100 0.0346729409822392 0.6602989769282335

0.0916200586466357 0.3682165314292099 0.4687573844058829

0.0304117406600521 0.2012407554924780 0.2986605742114568

0.6949682274103706 0.5295709750964672 0.6394069761039356

0.3654228284590389 0.8632325232304667 0.4632174555151599

0.2808960152203284 0.9730013627501339 0.2672917399561336

|                    |                    |                    |
|--------------------|--------------------|--------------------|
| 0.9575628371018317 | 0.3182803203750728 | 0.6116538003921056 |
| 0.6254044689330412 | 0.6438393630796918 | 0.4442356770519822 |
| 0.2263313256713509 | 0.3197985288268055 | 0.3775342180668089 |
| 0.8884002931924875 | 0.6483989769673189 | 0.7118819263226942 |
| 0.5576029593381674 | 0.9906892344629640 | 0.5434988616466186 |
| 0.2693654430390408 | 0.9792566370406038 | 0.5311361028112440 |
| 0.9278828237191249 | 0.3085587875729059 | 0.3445597303101026 |
| 0.7597375128022605 | 0.1979911231897429 | 0.5359264503354425 |
| 0.4238939328225254 | 0.5309072895890984 | 0.3676913197125031 |
| 0.0988050423471319 | 0.8694470969925682 | 0.6990275771477906 |
| 0.5462016347370177 | 0.7213277345682478 | 0.5599797388434388 |
| 0.2156178103313193 | 0.0612554688138085 | 0.3858310533003078 |
| 0.8737509641780719 | 0.3924177280229607 | 0.7302120488536574 |
| 0.1823542077433613 | 0.8125058308801807 | 0.3779170881397100 |
| 0.8546200891711772 | 0.1399971942134202 | 0.7114482344195353 |
| 0.5174141798833423 | 0.4773938223428796 | 0.5552562917324995 |
| 0.5255464895443811 | 0.1941463141077315 | 0.5311924807389672 |
| 0.1949834955583642 | 0.5247984118371762 | 0.3499312132985385 |
| 0.8612644464421045 | 0.8703683412056752 | 0.7032157146832296 |
| 0.3052370934622880 | 0.4655171155962833 | 0.5337224839502763 |
| 0.9710549251170963 | 0.7963635815171785 | 0.3636172271641884 |
| 0.6351083622946571 | 0.1357976178800706 | 0.7005556100324507 |
| 0.7846909192240336 | 0.7302329643171875 | 0.5593518125253921 |
| 0.4397664536270539 | 0.0589743180847926 | 0.3860039589604405 |
| 0.1151896993738043 | 0.3852749710908426 | 0.7286293197955589 |
| 0.6896112833124913 | 0.2754621503503312 | 0.3795661127624081 |
| 0.3644765390040454 | 0.6184682829781578 | 0.7100266246330861 |
| 0.0303027531284297 | 0.9451048273215701 | 0.5432805262690190 |
| 0.3062527435980548 | 0.2335671620726213 | 0.5289206518713319 |
| 0.9776075121649584 | 0.5742705328918846 | 0.3482399554156676 |
| 0.6313703556897035 | 0.8963039509138648 | 0.7028002589963074 |
| 0.0364069167468627 | 0.7435770372757888 | 0.5341995311038962 |
| 0.7056390294455491 | 0.0798820704703180 | 0.3645626859655494 |
| 0.3737102905067072 | 0.4022747893165429 | 0.6937789594529604 |
| 0.7739555187131224 | 0.9595052915950274 | 0.5588598092802695 |
| 0.4444883178651413 | 0.2874435321867454 | 0.3899579225936364 |
| 0.1202263014385894 | 0.6314048270087825 | 0.7291956822715829 |
| 0.1397509253739285 | 0.1477881474764484 | 0.3301433435816036 |
| 0.8146883946173029 | 0.4832667298815296 | 0.6752833489577211 |
| 0.5982836559136981 | 0.6249944980628576 | 0.3232244631145544 |
| 0.2564078729450120 | 0.9581695159940069 | 0.6532518817079142 |
| 0.9254944397573657 | 0.2929926353803963 | 0.4957312517014454 |
| 0.4702786764473375 | 0.8152898239287539 | 0.5110092222523728 |
| 0.3540763906199146 | 0.8966678334325092 | 0.3300492464471627 |

|                    |                    |                    |
|--------------------|--------------------|--------------------|
| 0.0205304572502613 | 0.2336645791559206 | 0.6752281776892579 |
| 0.8760952847157460 | 0.8779117665163896 | 0.3206615919209433 |
| 0.5482370541798465 | 0.2038711286762121 | 0.6518235293938603 |
| 0.2096959534063078 | 0.5368419670019241 | 0.4928877684635966 |
| 0.6898292067581249 | 0.5620488898521133 | 0.5153076720611458 |
| 0.6048158786664022 | 0.3622047704354100 | 0.3326253997992663 |
| 0.2689011735097265 | 0.6904855525065479 | 0.6734269899836921 |
| 0.6243425638806978 | 0.9034591848828877 | 0.3208867001155165 |
| 0.2958318382250412 | 0.2458759792897833 | 0.6495317068738340 |
| 0.9660488509115540 | 0.5773672644385266 | 0.4939437090156720 |
| 0.9415004785143458 | 0.0331884349991638 | 0.5126246250848374 |
| 0.9323432713486108 | 0.7928092921160589 | 0.4858271982564851 |
| 0.4753945219851869 | 0.3138981487649164 | 0.5066183721423949 |
| 0.1452428421058060 | 0.6483625523999924 | 0.3473982488041219 |
| 0.8018270329238008 | 0.9799080320238061 | 0.6784391194160274 |
| 0.5884872082946108 | 0.1218724817423630 | 0.3240293845224522 |
| 0.2634070277070604 | 0.4577724557057496 | 0.6631112607425349 |
| 0.7110144530217190 | 0.0447885485947162 | 0.4869490714626027 |
| 0.1904930516941860 | 0.0663202681491827 | 0.5010471703078971 |
| 0.8539870690033601 | 0.4015379859204704 | 0.3472065110570777 |
| 0.5185827033116021 | 0.7335367577507550 | 0.6749162009481581 |
| 0.3813757593928571 | 0.3716647170193244 | 0.3259737379309386 |
| 0.0486993589015853 | 0.7083428523049001 | 0.6650818037391797 |
| 0.4603104123405650 | 0.5716097530078065 | 0.4909448181611905 |
| 0.4355711211188151 | 0.0292539397401020 | 0.5011780160673113 |
| 0.0996364525312959 | 0.3570753791677221 | 0.3466246347033400 |
| 0.7877969613094474 | 0.7052567688196573 | 0.6764346340110846 |
| 0.1303945528930215 | 0.9136163712109776 | 0.3225521492584528 |
| 0.7968523433675061 | 0.2431579851154349 | 0.6676249565281143 |
| 0.7005549470727612 | 0.3034550853203032 | 0.4999762047990219 |
| 0.7012224195248727 | 0.8037142810031250 | 0.4995413162165387 |
| 0.1986406478836641 | 0.3009166391488108 | 0.4977556176535768 |
| 0.2011683310253322 | 0.8038189393307429 | 0.4989313599187110 |
| 0.8699484798776821 | 0.1306831022643279 | 0.3345491477783375 |
| 0.5342193784433715 | 0.4608181202053174 | 0.6703693384414200 |
| 0.3730631227068600 | 0.6444899376340705 | 0.3368307089407417 |
| 0.0307551026766376 | 0.9621484838153068 | 0.6648141817187873 |
| 0.3667367131907770 | 0.1358503299581211 | 0.3122006483490935 |
| 0.0359393130201979 | 0.4691331064776303 | 0.6850368449387785 |
| 0.8567445819193326 | 0.6317475392399631 | 0.3356451709289464 |
| 0.5421539162291937 | 0.9758350548258510 | 0.6650167366721312 |
| 0.5500042112766209 | 0.4323953719949554 | 0.7679182862936303 |
| 0.5554883344736196 | 0.4080503347034483 | 0.8284011798910068 |
| 0.6034525824691729 | 0.6379542639464538 | 0.7054451127020303 |

0.5939718881338950 0.6310199972129243 0.7591142115632130

### The perfect Rh<sub>11</sub>-O<sub>V6</sub>-[TS-CO-O]\* surface

O In Rh In C O

|                     |    |                     |    |                     |   |
|---------------------|----|---------------------|----|---------------------|---|
| 1.000000000000000   |    |                     |    |                     |   |
| 14.4443000000000001 |    | 0.000000000000000   |    | 0.000000000000000   |   |
| -7.2221500000000001 |    | 12.5091307398836005 |    | 0.000000000000000   |   |
| 0.00000000000000011 |    | 0.00000000000000019 |    | 17.9855000000000018 |   |
| O                   | In | Rh                  | In | C                   | O |
| 71                  | 41 | 1                   | 6  | 1                   | 2 |

Selective dynamics

Direct

|                    |                    |                    |
|--------------------|--------------------|--------------------|
| 0.8411133314316217 | 0.6141337019463435 | 0.4567350005237145 |
| 0.5155439746105159 | 0.9524946744561902 | 0.2893669655768463 |
| 0.1716211241737540 | 0.2816726700617380 | 0.6198166491003860 |
| 0.7928469233485060 | 0.9612097927362768 | 0.2979069723460839 |
| 0.4767000632793881 | 0.3050784325077629 | 0.6488142294408235 |
| 0.1340698559789004 | 0.6267993924245090 | 0.4698077023452498 |
| 0.3013833497078267 | 0.7318724995565802 | 0.3006630764445291 |
| 0.9764995827785796 | 0.0706458697161167 | 0.6361384146092846 |
| 0.6421873063748720 | 0.4054936524132557 | 0.4629385644029753 |
| 0.5295689615895327 | 0.2102090755886650 | 0.2691160858546411 |
| 0.1861001661539348 | 0.5424523575723370 | 0.6104539782356966 |
| 0.8567690980782317 | 0.8836679848449194 | 0.4411067179513566 |
| 0.8863687750549119 | 0.1290544760382417 | 0.4565140405619488 |
| 0.5481587099344765 | 0.4635751502128400 | 0.2900060581918140 |
| 0.2189772737559750 | 0.7930044604623987 | 0.6210786162971189 |
| 0.5394652023182971 | 0.7325470087060566 | 0.2985010754634416 |
| 0.2071981723940013 | 0.0798417187877973 | 0.6541807813519114 |
| 0.8748603430822683 | 0.4082015323459416 | 0.4688166420976572 |
| 0.7690250240503431 | 0.4693341196483942 | 0.2991484192254532 |
| 0.4284794191369699 | 0.8090076562054023 | 0.6361959439762046 |
| 0.0936198582877097 | 0.1347605632200697 | 0.4643440341429681 |
| 0.2900360600178686 | 0.2195475567049812 | 0.2691717376026048 |
| 0.9592989234805955 | 0.5444755941528001 | 0.6104073722821610 |
| 0.6167185499374881 | 0.8740696746072842 | 0.4423178648292350 |
| 0.3741335722859276 | 0.6591885776539073 | 0.4579210097541591 |
| 0.0369010409121984 | 0.9844433090558837 | 0.2888075745294216 |
| 0.7092908002854017 | 0.3302497462755127 | 0.6200043527289907 |
| 0.7678193903145996 | 0.7073032396042080 | 0.2983182463826282 |
| 0.4229300755680470 | 0.0331180201394901 | 0.6564205153084046 |
| 0.0916369614631094 | 0.3664566671327947 | 0.4691143574699623 |
| 0.0309205980921590 | 0.1992723554256912 | 0.2994741362897670 |
| 0.6934788876994631 | 0.5289250364452016 | 0.6352343374684750 |
| 0.3653254033863931 | 0.8603422243322640 | 0.4656664776510979 |
| 0.2811735903732853 | 0.9710224224741779 | 0.2693223844487775 |

|                    |                    |                    |
|--------------------|--------------------|--------------------|
| 0.9560660457306227 | 0.3163433449260040 | 0.6108406846492471 |
| 0.6261431868419081 | 0.6454280289643251 | 0.4421516688666287 |
| 0.2271871462200821 | 0.3179480014373368 | 0.3784532697225984 |
| 0.8869159539862039 | 0.6471978642501881 | 0.7107380923407902 |
| 0.5580766200853517 | 0.9880164745505127 | 0.5440821053839429 |
| 0.2677827989251469 | 0.9759020392200810 | 0.5307854034349688 |
| 0.9285695651466028 | 0.3063552260040510 | 0.3458578489470554 |
| 0.7590637572288230 | 0.1956944092664941 | 0.5346066667753533 |
| 0.4232677029465250 | 0.5292417035808654 | 0.3648493530280703 |
| 0.0987238025888146 | 0.8687313051132293 | 0.6994738400879115 |
| 0.5450124197349737 | 0.7170955806118400 | 0.5620925570479685 |
| 0.2155087749470823 | 0.0595453642952464 | 0.3877775647056367 |
| 0.8711880599524235 | 0.3907977833802008 | 0.7291576188681148 |
| 0.1825326440013058 | 0.8101757352333507 | 0.3790445715482491 |
| 0.8524554462566840 | 0.1377534105292142 | 0.7097425623058058 |
| 0.5133622369267812 | 0.4679911559652723 | 0.5411168879863766 |
| 0.5249752880836667 | 0.1929656994208386 | 0.5312483265725589 |
| 0.1947884287536468 | 0.5228158466752362 | 0.3492221429699356 |
| 0.8601304955704094 | 0.8676580705857262 | 0.7021137051911737 |
| 0.3039589590317817 | 0.4642043530968252 | 0.5336142108030373 |
| 0.9709421637245441 | 0.7939066540824129 | 0.3638352434517458 |
| 0.6328336332793256 | 0.1343734404268560 | 0.6997383008695266 |
| 0.7836292210909690 | 0.7283755959105349 | 0.5583120851820595 |
| 0.4407763987075555 | 0.0565873974905173 | 0.3880631710987075 |
| 0.1118592038258726 | 0.3828095345196445 | 0.7285076428104063 |
| 0.6914652996909254 | 0.2721869341240932 | 0.3781473105107409 |
| 0.3623619364427881 | 0.6170601761798054 | 0.7118469282481783 |
| 0.0289466893387882 | 0.9424487588226285 | 0.5434613797087451 |
| 0.3065047504206078 | 0.2317871294233314 | 0.5293429221575678 |
| 0.9781686841922763 | 0.5725225009101607 | 0.3480859401499075 |
| 0.6311184695544867 | 0.8932679869135995 | 0.7027390205452377 |
| 0.0356197158043798 | 0.7415186458109417 | 0.5341200087887543 |
| 0.7060428808453381 | 0.0766963345981893 | 0.3644079810360878 |
| 0.3733166831878734 | 0.4049729992010285 | 0.6929394308498686 |
| 0.7736874479291203 | 0.9574713545394786 | 0.5587773743508251 |
| 0.4439160688499939 | 0.2834490587590537 | 0.3875777352239069 |
| 0.1185735992401717 | 0.6295309496661403 | 0.7295010238226922 |
| 0.1402674148276333 | 0.1458667629972794 | 0.3317095600150850 |
| 0.8112328626337799 | 0.4818917020997517 | 0.6744582735989937 |
| 0.5987348285130878 | 0.6237447657964097 | 0.3220358363611737 |
| 0.2556047632402354 | 0.9568817390702407 | 0.6527392277270039 |
| 0.9251830842613842 | 0.2910824703296626 | 0.4948776801572947 |
| 0.4701738258323402 | 0.8117212854804379 | 0.5134512128607511 |
| 0.3544622211009312 | 0.8949152411687251 | 0.3323630921709295 |

|                    |                    |                    |
|--------------------|--------------------|--------------------|
| 0.0192610819539496 | 0.2317984749320274 | 0.6743239590218764 |
| 0.8764595072301589 | 0.8756450644006435 | 0.3208982220412864 |
| 0.5467649431404880 | 0.2056139648827724 | 0.6526074471923309 |
| 0.2097516564632542 | 0.5351093986169460 | 0.4939615621026476 |
| 0.6869452950158390 | 0.5580321120225591 | 0.5126494012458309 |
| 0.6061124904623796 | 0.3599532265596821 | 0.3323986655895723 |
| 0.2683388728054794 | 0.6889783454310887 | 0.6746512820324995 |
| 0.6247122800597396 | 0.9013103829619737 | 0.3215627557621801 |
| 0.3003365069612940 | 0.2476904239886153 | 0.6506946112155276 |
| 0.9651798636506257 | 0.5753945917628016 | 0.4943247987929738 |
| 0.9409826382358233 | 0.0306709296266874 | 0.5127729556450760 |
| 0.9305790331964943 | 0.7900828782832789 | 0.4862046181093689 |
| 0.4747247449757239 | 0.3104466215271415 | 0.5035994160360175 |
| 0.1454813229482070 | 0.6463064861244092 | 0.3481445105216352 |
| 0.8009996093041067 | 0.9771992344254059 | 0.6785035757856761 |
| 0.5883199236538559 | 0.1188913950319019 | 0.3244579477370877 |
| 0.2617597496987329 | 0.4556842215503423 | 0.6645408449028309 |
| 0.7106840350068708 | 0.0420295620748306 | 0.4870368806115266 |
| 0.1903165959236688 | 0.0653037928166569 | 0.5035541128249008 |
| 0.8548575552638411 | 0.3997120456413796 | 0.3471090461180211 |
| 0.5187402572087123 | 0.7276553975620317 | 0.6790597199369444 |
| 0.3816999780203503 | 0.3695859552727043 | 0.3251713336081679 |
| 0.0469571649842138 | 0.7064507362199350 | 0.6658030420189647 |
| 0.4594380405342235 | 0.5678402849476853 | 0.4890474691802211 |
| 0.4352505601033272 | 0.0267987916894228 | 0.5038082488564939 |
| 0.1006235590778388 | 0.3550924631926335 | 0.3475323457905120 |
| 0.7831724449341522 | 0.7013433977891950 | 0.6762090834142782 |
| 0.1307516797485206 | 0.9121016802175177 | 0.3245967837278698 |
| 0.7950321418158168 | 0.2416838444747356 | 0.6664587083688076 |
| 0.7000388749989384 | 0.3008355947572454 | 0.4989569127876337 |
| 0.7003058043316699 | 0.8010741151363021 | 0.5001578612228244 |
| 0.1993462993252848 | 0.2993319378393622 | 0.4991370151239991 |
| 0.2006567577815517 | 0.8012947766316714 | 0.4999774247503055 |
| 0.8704721157683935 | 0.1281294647744318 | 0.3350848658628252 |
| 0.5338373802274461 | 0.4684703641477199 | 0.6667920529307807 |
| 0.3732420151371301 | 0.6430988462449108 | 0.3364697164316226 |
| 0.0295144083015160 | 0.9597853799003744 | 0.6646478875971127 |
| 0.3669727507802278 | 0.1338420584477831 | 0.3133232149390395 |
| 0.0337292826507962 | 0.4673893437378140 | 0.6847888701636720 |
| 0.8568814767378541 | 0.6295427223260930 | 0.3353715171425193 |
| 0.5421609718616480 | 0.9738861875181613 | 0.6651457237267806 |
| 0.5662959505545615 | 0.5240396661014088 | 0.7619362449676714 |
| 0.5730009450337405 | 0.5284768039567851 | 0.8276714577864510 |
| 0.6032986444132789 | 0.6305825237934783 | 0.7083441437139466 |

### The perfect Rh<sub>11</sub>-CO\* \_P surface

O In Rh In C O

|                     |                     |                    |    |   |   |
|---------------------|---------------------|--------------------|----|---|---|
| 1.000000000000000   |                     |                    |    |   |   |
| 14.444300000000001  | 0.000000000000000   | 0.000000000000000  |    |   |   |
| -7.2221499999999965 | 12.5091307398835685 | 0.000000000000000  |    |   |   |
| 0.0000000000000011  | 0.0000000000000019  | 17.985499999999983 |    |   |   |
| O                   | In                  | Rh                 | In | C | O |
| 71                  | 41                  | 1                  | 6  | 1 | 2 |

Direct

|                    |                    |                    |
|--------------------|--------------------|--------------------|
| 0.8418463829459132 | 0.6140456475885971 | 0.4568706895242353 |
| 0.5154670144429725 | 0.9538189113437211 | 0.2890526847654824 |
| 0.1718647693760041 | 0.2833034172524017 | 0.6197832514039672 |
| 0.7924425173607568 | 0.9621952277345259 | 0.2975625477163475 |
| 0.4752523652842063 | 0.3017348284444614 | 0.6446184142059085 |
| 0.1328036224846185 | 0.6268215790338985 | 0.4690131033951017 |
| 0.3011244432011557 | 0.7324903850545970 | 0.3002031609638474 |
| 0.9770605582872496 | 0.0717327458592577 | 0.6357614428556330 |
| 0.6403831294597132 | 0.4073011313980565 | 0.4667493616014353 |
| 0.5288868278951282 | 0.2119154277986105 | 0.2705074748038073 |
| 0.1850647700145001 | 0.5422758133613814 | 0.6101779141183837 |
| 0.8564488280058618 | 0.8843445900153156 | 0.4409976205218116 |
| 0.8864626343678389 | 0.1301753221775138 | 0.4561851158014512 |
| 0.5469586905083744 | 0.4639280473600677 | 0.2904120799147122 |
| 0.2187370603316252 | 0.7929830064119314 | 0.6206606418586333 |
| 0.5388244656282636 | 0.7325321771656620 | 0.2988760830735455 |
| 0.2065368023970893 | 0.0798052651385041 | 0.6524537293973270 |
| 0.8747732360633498 | 0.4088324504160075 | 0.4691038471312192 |
| 0.7671473223594376 | 0.4698265593276955 | 0.3005083772390273 |
| 0.4288881510968887 | 0.8076765704959588 | 0.6357097162340444 |
| 0.0936450140824482 | 0.1356203633897768 | 0.4646126543231998 |
| 0.2903885133584641 | 0.2204743057264005 | 0.2706454163922384 |
| 0.9597394840341160 | 0.5447093652982581 | 0.6110369156330003 |
| 0.6175012360487887 | 0.8757836861244347 | 0.4412107407417136 |
| 0.3714004246394904 | 0.6593711797841731 | 0.4575680065978971 |
| 0.0366144306269826 | 0.9852175237508265 | 0.2889633816061504 |
| 0.7095601427135448 | 0.3289833081064428 | 0.6214508447404657 |
| 0.7673102100452505 | 0.7080433532571588 | 0.2989750047659788 |
| 0.4225374729819045 | 0.0317798656261907 | 0.6571569051613670 |
| 0.0909905503004059 | 0.3674679964066082 | 0.4688227580787497 |
| 0.0304061589330372 | 0.1997775056878583 | 0.2993856683655801 |
| 0.6937001245508237 | 0.5247095401456338 | 0.6364053177188165 |
| 0.3648933940307684 | 0.8609545485550145 | 0.4648849200878594 |
| 0.2809011931649445 | 0.9722268465026529 | 0.2695098660350125 |
| 0.9559127741910036 | 0.3166169140159734 | 0.6116180950494894 |



|                    |                    |                    |
|--------------------|--------------------|--------------------|
| 0.6253359712669604 | 0.6428691877792950 | 0.4430905058475036 |
| 0.2260087371170471 | 0.3188944633994076 | 0.3782987577311908 |
| 0.8849362924535763 | 0.6489563104735955 | 0.7090076419866632 |
| 0.5577137372437754 | 0.9883682547291498 | 0.5438581252107850 |
| 0.2680396294824305 | 0.9766356333201375 | 0.5306578745069814 |
| 0.9276721629278021 | 0.3072225486809729 | 0.3444283107846497 |
| 0.7590456112635724 | 0.1959980482248258 | 0.5348555699731101 |
| 0.4232193211891322 | 0.5299378426715479 | 0.3668675214586148 |
| 0.0993793059662453 | 0.8697638683800223 | 0.6998794537443823 |
| 0.5438786021181921 | 0.7204998654923541 | 0.5577999702659994 |
| 0.2150583354547723 | 0.0601334854576864 | 0.3883184193126446 |
| 0.8719492570813767 | 0.3914117324471414 | 0.7302836972819995 |
| 0.1819779663722655 | 0.8105306679808656 | 0.3787239283510380 |
| 0.8529513353687542 | 0.1379658252459723 | 0.7107436429103814 |
| 0.5165851871057752 | 0.4754247042751995 | 0.5523431886301761 |
| 0.5254740575157644 | 0.1927886624542389 | 0.5309506572514842 |
| 0.1941125492703581 | 0.5232333146019933 | 0.3479437222135874 |
| 0.8602394431836751 | 0.8685482295825601 | 0.7021175781710061 |
| 0.3044416831369446 | 0.4648351435740891 | 0.5335754679438068 |
| 0.9706549920170442 | 0.7947510053705069 | 0.3641024326978182 |
| 0.6326853180764792 | 0.1321497098862074 | 0.7000220626562955 |
| 0.7845558141266261 | 0.7289012141512896 | 0.5580282252185441 |
| 0.4401552762330554 | 0.0570837575494679 | 0.3878919627536884 |
| 0.1123649862373559 | 0.3830664151804982 | 0.7289750353322278 |
| 0.6902993992109391 | 0.2739469620599616 | 0.3796297763956347 |
| 0.3624273150095949 | 0.6162736716166226 | 0.7102365089827652 |
| 0.0288293357095936 | 0.9430697827407970 | 0.5432279209900062 |
| 0.3066153803978486 | 0.2342873797379506 | 0.5288517997818646 |
| 0.9776727468920028 | 0.5729065955493898 | 0.3455623743266131 |
| 0.6311794064117306 | 0.8917540449232844 | 0.7017702350527841 |
| 0.0357305062729909 | 0.7421644167598554 | 0.5344749468171788 |
| 0.7058873238330816 | 0.0785321593071563 | 0.3640590577365453 |
| 0.3738678843832555 | 0.4041342015054696 | 0.6928546796056184 |
| 0.7738598382869992 | 0.9582317480373438 | 0.5584956972172800 |
| 0.4442046455015359 | 0.2861953197104795 | 0.3909877566773399 |
| 0.1192607825549660 | 0.6305620661768475 | 0.7293702871700248 |
| 0.1396744043163611 | 0.1465025463524690 | 0.3322438311346437 |
| 0.8127655269862850 | 0.4825473445025619 | 0.6751643462160866 |
| 0.5982576118848553 | 0.6239711071054519 | 0.3228875983490418 |
| 0.2555017583540742 | 0.9565935148847527 | 0.6524492771135867 |
| 0.9248170867347130 | 0.2914521600173233 | 0.4957424540827356 |
| 0.4696396462262755 | 0.8125410343814974 | 0.5128204261416340 |
| 0.3540507184597849 | 0.8954045566744018 | 0.3318555339857306 |
| 0.0192213929397291 | 0.2320183328666658 | 0.6748396333143305 |

|                    |                    |                    |
|--------------------|--------------------|--------------------|
| 0.8760583928489080 | 0.8765383661259974 | 0.3210544577455083 |
| 0.5467383727335531 | 0.2022358672262101 | 0.6517685102168745 |
| 0.2091464539127247 | 0.5358064420768384 | 0.4939192980415261 |
| 0.6893990070772209 | 0.5608199520738999 | 0.5148219722102410 |
| 0.6048075680329867 | 0.3609672762579214 | 0.3343677627299909 |
| 0.2693976798849299 | 0.6894773973704754 | 0.6742240867794870 |
| 0.6242855135302906 | 0.9021420866541622 | 0.3211425066196553 |
| 0.2982790543637308 | 0.2470740230093901 | 0.6497648279450947 |
| 0.9652005909281428 | 0.5759082655289064 | 0.4951973539577711 |
| 0.9407052048463657 | 0.0314038056327854 | 0.5127850388623743 |
| 0.9306629797482944 | 0.7906257329788569 | 0.4864978030997446 |
| 0.4758020829779465 | 0.3132267072861951 | 0.5079282128885176 |
| 0.1448396329523237 | 0.6467378675964718 | 0.3473447231401510 |
| 0.8006337141845312 | 0.9771861495848096 | 0.6786274100417722 |
| 0.5880795675275984 | 0.1202577426938622 | 0.3249325742417341 |
| 0.2620441559109914 | 0.4565808236487225 | 0.6645086092312305 |
| 0.7105051308351444 | 0.0425433612222330 | 0.4868533478034152 |
| 0.1904274170272872 | 0.0662279794088822 | 0.5041727467132708 |
| 0.8541863818127581 | 0.4006023622902174 | 0.3472670180732549 |
| 0.5221846756129808 | 0.7228988018139560 | 0.6771117809935716 |
| 0.3812784888374836 | 0.3703373694422063 | 0.3268930973440085 |
| 0.0463583113385102 | 0.7072267659231085 | 0.6662565924894350 |
| 0.4598193702396368 | 0.5703739828764330 | 0.4905245497346834 |
| 0.4351259812105809 | 0.0269087224316299 | 0.5034263138155030 |
| 0.0994353605949873 | 0.3558392415898204 | 0.3469522917774451 |
| 0.7751833075504636 | 0.6999417318548542 | 0.6775399565717990 |
| 0.1304368912676202 | 0.9128246054198098 | 0.3247780920653391 |
| 0.7951496613028914 | 0.2414675288178476 | 0.6677305823469513 |
| 0.7000934186060315 | 0.3016403615428340 | 0.5000610029021074 |
| 0.7003003158100674 | 0.8016103811668646 | 0.4997445924108329 |
| 0.1985544048614144 | 0.3003686688852616 | 0.4986886910383626 |
| 0.2003312362202454 | 0.8015624362367182 | 0.4996922259020601 |
| 0.8699042837207542 | 0.1291843445682135 | 0.3348027338627026 |
| 0.5359273012371492 | 0.4659242741173816 | 0.6692777345463232 |
| 0.3724405511192215 | 0.6432297324343744 | 0.3367160601519498 |
| 0.0277452193478445 | 0.9585091287491208 | 0.6644117187563323 |
| 0.3665742925054390 | 0.1346678395901289 | 0.3147992957743915 |
| 0.0345217481557004 | 0.4681225807815332 | 0.6852643872412569 |
| 0.8569917627914748 | 0.6304210512583936 | 0.3355570555572061 |
| 0.5422055741094997 | 0.9711577956104620 | 0.6652633459377342 |
| 0.5539100352720528 | 0.4541184658742617 | 0.7690780660122287 |
| 0.5626489442824824 | 0.4470654819459774 | 0.8324220224681473 |
| 0.6043807606417259 | 0.6343598479482432 | 0.6938781116418430 |

### The perfect Rh<sub>11</sub>-H<sub>2</sub>\*\_P surface

O In Rh In H

|                     |                     |                     |  |  |
|---------------------|---------------------|---------------------|--|--|
| 1.000000000000000   |                     |                     |  |  |
| 14.4442996979000000 | 0.0000000000000000  | 0.0000000000000000  |  |  |
| -7.2221498489000000 | 12.5091304781999995 | 0.0000000000000000  |  |  |
| 0.0000000000000000  | 0.0000000000000000  | 17.9855003356999994 |  |  |

|    |    |    |    |   |
|----|----|----|----|---|
| O  | In | Rh | In | H |
| 72 | 41 | 1  | 6  | 2 |

Direct

|                    |                    |                    |
|--------------------|--------------------|--------------------|
| 0.8431470315038997 | 0.6131003124191680 | 0.4557280946570610 |
| 0.5154656600330294 | 0.9523397313010036 | 0.2887911316848026 |
| 0.1726535373176806 | 0.2829101531843343 | 0.6201569695272199 |
| 0.7923619243873360 | 0.9609120744490423 | 0.2971910451956535 |
| 0.4748242090059032 | 0.3016095632363078 | 0.6413932953286324 |
| 0.1329368425906036 | 0.6252844596136578 | 0.4686413086743194 |
| 0.3012282789573692 | 0.7314277424026873 | 0.2996769632880278 |
| 0.9767767663315275 | 0.0701922233110735 | 0.6359602651528193 |
| 0.6398302775962745 | 0.4052323161369039 | 0.4651411678861347 |
| 0.5287296137460464 | 0.2102863349087997 | 0.2700563070332924 |
| 0.1853737584261219 | 0.5406909101223901 | 0.6104632533847806 |
| 0.8562903812616787 | 0.8830594787517686 | 0.4404884471086288 |
| 0.8865050125028507 | 0.1289024263621883 | 0.4560270085459530 |
| 0.5465531715615962 | 0.4622280103711293 | 0.2897248490566685 |
| 0.2182312801049633 | 0.7916587909005064 | 0.6205319469161518 |
| 0.5388044544487813 | 0.7310320323772144 | 0.2985425374702638 |
| 0.2061862931647763 | 0.0786530521662891 | 0.6509152708066648 |
| 0.8750721075131765 | 0.4078623458318446 | 0.4684263309267384 |
| 0.7673413890203097 | 0.4687000056103667 | 0.2998131261141865 |
| 0.4286458440797246 | 0.8062036047135519 | 0.6353516159623724 |
| 0.0933591235933667 | 0.1345705372352954 | 0.4646908830583736 |
| 0.2899911481607517 | 0.2189380980686348 | 0.2703047295829356 |
| 0.9592124038019236 | 0.5434138493942258 | 0.6107504917233971 |
| 0.6173760768106353 | 0.8737943531451614 | 0.4410860050049626 |
| 0.3712562798879553 | 0.6583437589564924 | 0.4569830093425503 |
| 0.0366644289761076 | 0.9841580023009281 | 0.2888195609889376 |
| 0.7089765823245050 | 0.3281240448262192 | 0.6202277518466901 |
| 0.7671503536829628 | 0.7066017179284262 | 0.2987519067216195 |
| 0.4222345670551335 | 0.0308326895404682 | 0.6559203594722630 |
| 0.0917766426956488 | 0.3668453757648419 | 0.4687347315809814 |
| 0.0304438870319768 | 0.1985448969453127 | 0.2993065667246217 |
| 0.6925369111866476 | 0.5245020082471393 | 0.6342584810987437 |
| 0.3647564865042712 | 0.8590947517504736 | 0.4647078360296603 |
| 0.2807082944615301 | 0.9708700733554633 | 0.2691940856584999 |
| 0.9560484177832071 | 0.3155381960334416 | 0.6111607140425027 |

|                    |                    |                    |
|--------------------|--------------------|--------------------|
| 0.6244373041847493 | 0.6398501571753695 | 0.4429983659770221 |
| 0.2261159606294658 | 0.3176363838915838 | 0.3782446573335202 |
| 0.8837235435668105 | 0.6472627469392900 | 0.7084345473381249 |
| 0.5578897455321253 | 0.9866767404778429 | 0.5436081655351114 |
| 0.2676692044553338 | 0.9750120491650995 | 0.5300118849087849 |
| 0.9279457914278427 | 0.3059490583349135 | 0.3447945175058006 |
| 0.5985120151230573 | 0.6262780020206327 | 0.6955438342113329 |
| 0.7593761306880199 | 0.1948913921993811 | 0.5344783411622114 |
| 0.4230809674641693 | 0.5285899295782206 | 0.3662944696687416 |
| 0.0989267484269362 | 0.8684656232775917 | 0.6997762074308287 |
| 0.5437486508042517 | 0.7183151572769446 | 0.5579794998748503 |
| 0.2148583071194651 | 0.0588698250762696 | 0.3884591324755063 |
| 0.8706493180063102 | 0.3900580118415376 | 0.7293409201567619 |
| 0.1819658136659762 | 0.8091004185427770 | 0.3784762701914115 |
| 0.8522445028698614 | 0.1366228052761678 | 0.7099302634156616 |
| 0.5179672693967903 | 0.4728806852295159 | 0.5508359636743756 |
| 0.5265004999471906 | 0.1903357401682963 | 0.5296878378102007 |
| 0.1942791471191295 | 0.5220151801212269 | 0.3467550436857522 |
| 0.8584467885578297 | 0.8658625890005646 | 0.7015416169497075 |
| 0.3058865861299395 | 0.4641030014221554 | 0.5335256033920318 |
| 0.9707150663037143 | 0.7935824660812441 | 0.3635150203492752 |
| 0.6320219546583311 | 0.1315494616577047 | 0.6992704463289536 |
| 0.7846068194856021 | 0.7280537300619124 | 0.5573011207291179 |
| 0.4399652137228410 | 0.0554898317868778 | 0.3876201871137137 |
| 0.1113959413149689 | 0.3815198112953704 | 0.7293030851092276 |
| 0.6908843098443970 | 0.2726529565115184 | 0.3786411970397331 |
| 0.3617043638483066 | 0.6156553276215979 | 0.7112817667448101 |
| 0.0282831982183784 | 0.9416045977876356 | 0.5430178963766105 |
| 0.3062351379341292 | 0.2334407145614781 | 0.5283267844896369 |
| 0.9780618096010090 | 0.5716304642296528 | 0.3443095084966008 |
| 0.6305719782046121 | 0.8902538878291213 | 0.7016721891026381 |
| 0.0356412185253918 | 0.7409182603163468 | 0.5341364392407062 |
| 0.7057603166127395 | 0.0769070123027391 | 0.3640452242240170 |
| 0.3774532092347749 | 0.4058856580403636 | 0.6940933260734938 |
| 0.7737193544788411 | 0.9568010551934136 | 0.5582450701896244 |
| 0.4439112192395483 | 0.2843321058930229 | 0.3901060843060931 |
| 0.1184417280477753 | 0.6291235369711153 | 0.7291146040152919 |
| 0.1395340740441908 | 0.1451989990339443 | 0.3323980330541265 |
| 0.8110413088278382 | 0.4813051575229317 | 0.6741785080849366 |
| 0.5980855287211835 | 0.6222445271375326 | 0.3223189271065620 |
| 0.2550015313520065 | 0.9554257746581286 | 0.6518918733160645 |
| 0.9251955697769935 | 0.2904317302947664 | 0.4952209471773510 |
| 0.4697773638721534 | 0.8111792868395269 | 0.5129318275225012 |
| 0.3539544311851278 | 0.8941113096474494 | 0.3315323715878848 |

|                    |                    |                    |
|--------------------|--------------------|--------------------|
| 0.0189669990422668 | 0.2307150851469700 | 0.6746217777379576 |
| 0.8760678398296676 | 0.8753743760562472 | 0.3206659569448374 |
| 0.5461391329887385 | 0.2020121003333613 | 0.6508851153987240 |
| 0.2094987699393986 | 0.5347010614186216 | 0.4944484133991962 |
| 0.6921511257595787 | 0.5595608518114310 | 0.5133805402383139 |
| 0.6049390409175366 | 0.3596308270402715 | 0.3335719712552887 |
| 0.2689225484898760 | 0.6883380286141985 | 0.6742462631223312 |
| 0.6242580190377229 | 0.9007099438464461 | 0.3209973419364073 |
| 0.2995460038709424 | 0.2469116356602562 | 0.6498886874268658 |
| 0.9657065586449999 | 0.5746953391606496 | 0.4951020117919827 |
| 0.9404592956422985 | 0.0300658599278536 | 0.5127139550339841 |
| 0.9309270248314399 | 0.7897082270445924 | 0.4860018852617616 |
| 0.4750778231476813 | 0.3082265714733055 | 0.5069648757767553 |
| 0.1450525912374927 | 0.6453775940846164 | 0.3468726475830110 |
| 0.8000381835825219 | 0.9756092868901719 | 0.6784397771287914 |
| 0.5879320834992398 | 0.1187292129608776 | 0.3246612103933434 |
| 0.2622295402818950 | 0.4553116292882698 | 0.6661711206368494 |
| 0.7105756447136656 | 0.0411652287382822 | 0.4867048106154304 |
| 0.1900838890094227 | 0.0651838633239142 | 0.5045761748614669 |
| 0.8546525148496444 | 0.3996371743886475 | 0.3465985216442990 |
| 0.5216312704381906 | 0.7209185350516270 | 0.6775902195561065 |
| 0.3809008855839248 | 0.3687548863152516 | 0.3264186177327735 |
| 0.0454157151252967 | 0.7057408100129376 | 0.6662451245826850 |
| 0.4595537790664006 | 0.5703896736687154 | 0.4894064667845202 |
| 0.4347866806723900 | 0.0246406652230133 | 0.5032160404123840 |
| 0.0997629853650651 | 0.3547086810696780 | 0.3467620704411682 |
| 0.7722038961554109 | 0.6965342287396500 | 0.6770979489982775 |
| 0.1305321673812463 | 0.9117621539211521 | 0.3247160438857099 |
| 0.7945899807327785 | 0.2402915156193038 | 0.6668772426088385 |
| 0.7005276725187164 | 0.3002368677850876 | 0.4990480902918804 |
| 0.7003946987953459 | 0.8000564849466076 | 0.4995272021560966 |
| 0.1988879688007550 | 0.2994155792689621 | 0.4987840720145443 |
| 0.2002050161344529 | 0.8001899743813898 | 0.4994360319367103 |
| 0.8699137310878117 | 0.1278387425945189 | 0.3346820274061811 |
| 0.5324166861278167 | 0.4678963881582772 | 0.6607392388591007 |
| 0.3721395854119195 | 0.6418315651345571 | 0.3360175328627761 |
| 0.0265356663056825 | 0.9563056646435366 | 0.6642279400704338 |
| 0.3663372143857976 | 0.1331856722869947 | 0.3144741423919349 |
| 0.0336296709677737 | 0.4666588539927009 | 0.6850998324259662 |
| 0.8577633588328843 | 0.6293956443263159 | 0.3344807705436459 |
| 0.5419774863657766 | 0.9701317586568503 | 0.6650062732903257 |
| 0.5919616906174759 | 0.6463481795345161 | 0.8643836181108864 |
| 0.6422105369224633 | 0.6815748850076105 | 0.8842431326431557 |

**The perfect Rh<sub>11</sub>-[TS-2H]\* surface**

| O                   | In | Rh                  | In | H                   |
|---------------------|----|---------------------|----|---------------------|
| 1.000000000000000   |    |                     |    |                     |
| 14.4442996979000000 |    | 0.0000000000000000  |    | 0.0000000000000000  |
| -7.2221498489000000 |    | 12.5091304781999995 |    | 0.0000000000000000  |
| 0.0000000000000000  |    | 0.0000000000000000  |    | 17.9855003356999994 |

| O  | In | Rh | In | H |
|----|----|----|----|---|
| 72 | 41 | 1  | 6  | 2 |

**Direct**

|                    |                    |                    |
|--------------------|--------------------|--------------------|
| 0.8428534233100469 | 0.6129717873972244 | 0.4562032415688924 |
| 0.5159864596597904 | 0.9521550815938385 | 0.2892394111835903 |
| 0.1735947998149167 | 0.2830319720897162 | 0.6211011690961541 |
| 0.7922023794067388 | 0.9604156473353206 | 0.2982602862135000 |
| 0.4739405439234789 | 0.2989357890663967 | 0.6409368960654023 |
| 0.1335570283803293 | 0.6254532272459850 | 0.4688171689879830 |
| 0.3019233989360515 | 0.7310027124598614 | 0.3006759351970060 |
| 0.9775685055611278 | 0.0707671813911980 | 0.6365748023885489 |
| 0.6395570966200840 | 0.4051579637350745 | 0.4655088457963503 |
| 0.5290850125282898 | 0.2102886201597737 | 0.2704726332089402 |
| 0.1834232834040634 | 0.5393889253388524 | 0.6104335272283063 |
| 0.8557190222942044 | 0.8819364715685011 | 0.4416280006646453 |
| 0.8869865719278126 | 0.1287609456624388 | 0.4564068480767048 |
| 0.5468055242191868 | 0.4625427827562856 | 0.2913788908050973 |
| 0.2180058416044072 | 0.7912555702985776 | 0.6204700587577225 |
| 0.5387912919069977 | 0.7308126353325157 | 0.3000724463344561 |
| 0.2058827476434213 | 0.0776634022249579 | 0.6508494367494180 |
| 0.8753881935012084 | 0.4076866114725757 | 0.4686218132547414 |
| 0.7675883196835841 | 0.4684481221281085 | 0.3001465738725365 |
| 0.4281329538143829 | 0.8090892317749870 | 0.6383837484305355 |
| 0.0939171730896623 | 0.1345537271050941 | 0.4652669493636554 |
| 0.2902853755488954 | 0.2192862961203911 | 0.2710875364403465 |
| 0.9598227621479213 | 0.5436523212660240 | 0.6105730091468050 |
| 0.6170550214486187 | 0.8730945209646859 | 0.4429129742576088 |
| 0.3724105289574538 | 0.6586122165276820 | 0.4594078540105441 |
| 0.0364229845240765 | 0.9839916021186867 | 0.2896795809073724 |
| 0.7103150819021253 | 0.3282144543393692 | 0.6197894740900578 |
| 0.7663560721331923 | 0.7060925334855085 | 0.3003851128877072 |
| 0.4225788762260695 | 0.0322219674466894 | 0.6574832656494494 |
| 0.0922584075406477 | 0.3665540699672074 | 0.4692790554332906 |
| 0.0307101858883168 | 0.1983794085890774 | 0.2998782684518452 |
| 0.6943961006999104 | 0.5220081201197848 | 0.6350434996062418 |
| 0.3652724026534679 | 0.8588277351791743 | 0.4654817857031756 |
| 0.2806581401860917 | 0.9707580884913535 | 0.2691929108278936 |
| 0.9568056142136326 | 0.3155931496587135 | 0.6113280054634760 |

|                    |                    |                    |
|--------------------|--------------------|--------------------|
| 0.6238405235787251 | 0.6404022584568384 | 0.4460376227269597 |
| 0.2264152950363072 | 0.3176326861866272 | 0.3791036507932886 |
| 0.8857723512343029 | 0.6465191639930705 | 0.7103784162841580 |
| 0.5578518204224916 | 0.9875607031790311 | 0.5442850600823927 |
| 0.2684188483444649 | 0.9751683055047865 | 0.5304517591291050 |
| 0.9282567979341484 | 0.3057261498250191 | 0.3453486960712729 |
| 0.6011948165575962 | 0.6211170863266958 | 0.6969438044755809 |
| 0.7599337397880973 | 0.1947412014995744 | 0.5348124607558701 |
| 0.4236610236679400 | 0.5286100390731051 | 0.3689281408938882 |
| 0.0992399608783059 | 0.8682342087344264 | 0.6998795105410536 |
| 0.5444134615510011 | 0.7200946593950992 | 0.5635936305753292 |
| 0.2149835032187023 | 0.0584537143788710 | 0.3889324470482672 |
| 0.8720139211696155 | 0.3900332844109863 | 0.7298852272409793 |
| 0.1824494709574091 | 0.8091445568666368 | 0.3784751457954478 |
| 0.8543495886834009 | 0.1385301438574650 | 0.7111131497566349 |
| 0.5194226793329004 | 0.4733253077543014 | 0.5537337701136690 |
| 0.5270668495134533 | 0.1901856920054047 | 0.5296341627345955 |
| 0.1948381308025760 | 0.5218299908474993 | 0.3477279745102334 |
| 0.8591176500185254 | 0.8661276991779500 | 0.7016478008877602 |
| 0.3061943202708061 | 0.4637713478921936 | 0.5353047885529308 |
| 0.9707114232474422 | 0.7931791998226055 | 0.3635853003502535 |
| 0.6332768906733655 | 0.1348173383344258 | 0.7009796514905882 |
| 0.7850718247782984 | 0.7271741204805331 | 0.5588635669421805 |
| 0.4398461210030123 | 0.0549554347856973 | 0.3873982517855535 |
| 0.1126443551696668 | 0.3818456344785404 | 0.7300445645808200 |
| 0.6911353578164013 | 0.2725160437019788 | 0.3789353828529213 |
| 0.3589454447477540 | 0.6143801707747581 | 0.7092525337725685 |
| 0.0284924513333029 | 0.9414519113614699 | 0.5433579539973094 |
| 0.3064001012185072 | 0.2334228390472647 | 0.5289943438990110 |
| 0.9782787482438621 | 0.5715082446684472 | 0.3452630020295336 |
| 0.6338346636963328 | 0.9000215748764914 | 0.7004832824480438 |
| 0.0359849516280175 | 0.7409312475678907 | 0.5339128524181648 |
| 0.7057295920775378 | 0.0763975282250321 | 0.3649952327744207 |
| 0.3790275837316549 | 0.4034435401262672 | 0.6960854080675595 |
| 0.7751240432987290 | 0.9576083898193876 | 0.5589089834056258 |
| 0.4437932320817077 | 0.2836531471070288 | 0.3906743476767839 |
| 0.1178721990759712 | 0.6287256439974367 | 0.7296784542093451 |
| 0.1398169574291769 | 0.1450775304462110 | 0.3331143564372152 |
| 0.8127396977684067 | 0.4806230579259498 | 0.6745460530883448 |
| 0.5977663354293387 | 0.6222122277870820 | 0.3247946955202682 |
| 0.2553505058953303 | 0.9549451983196519 | 0.6522556016079617 |
| 0.9255723856050095 | 0.2902590389488841 | 0.4955423923785072 |
| 0.4701202359673291 | 0.8117065088784302 | 0.5154625699476438 |
| 0.3541774873410432 | 0.8939143102333128 | 0.3313345528894774 |

|                    |                    |                    |
|--------------------|--------------------|--------------------|
| 0.0200351510096614 | 0.2315172873823952 | 0.6754540576485564 |
| 0.8758314147188064 | 0.8749910535002060 | 0.3216499647132859 |
| 0.5474768423448274 | 0.2027278030586978 | 0.6509166611274166 |
| 0.2095178680805265 | 0.5343959254025755 | 0.4952085523483840 |
| 0.6925227780873021 | 0.5589362468100275 | 0.5146947476877900 |
| 0.6050655455045966 | 0.3594549504810841 | 0.3341346473621158 |
| 0.2672064444439132 | 0.6871855404335631 | 0.6742068578727729 |
| 0.6242129388325228 | 0.9002990611318142 | 0.3225494994845241 |
| 0.2988421885441443 | 0.2453491239436235 | 0.6507342059540031 |
| 0.9660992821206575 | 0.5746929144130735 | 0.4948961841662604 |
| 0.9410006824976834 | 0.0299833288907420 | 0.5130770968240654 |
| 0.9311134025858484 | 0.7895638416985301 | 0.4862296130208562 |
| 0.4750618248198304 | 0.3077875172956145 | 0.5072802187018135 |
| 0.1454219098191038 | 0.6452051149144488 | 0.3472826042694592 |
| 0.8018319222075260 | 0.9778141283541713 | 0.6791221213417237 |
| 0.5882538049743925 | 0.1185355442329951 | 0.3249631580770956 |
| 0.2634137765863864 | 0.4548965681051966 | 0.6666633661569445 |
| 0.7108241519005610 | 0.0409978052217071 | 0.4875936863982281 |
| 0.1904358813880909 | 0.0648868882558606 | 0.5050644982329495 |
| 0.8548493720239886 | 0.3994028096541699 | 0.3469108372212558 |
| 0.5201753332044586 | 0.7302248580660057 | 0.6840927115385371 |
| 0.3812387370601080 | 0.3690093665391511 | 0.3277483890450949 |
| 0.0462076282821857 | 0.7056393831842428 | 0.6663101748285239 |
| 0.4604444800814640 | 0.5717918032127618 | 0.4933234827155159 |
| 0.4350963886680026 | 0.0247292118986306 | 0.5028867701916269 |
| 0.1000928316618728 | 0.3544658987538061 | 0.3473182731204479 |
| 0.7773044780768963 | 0.6968208186930581 | 0.6776533099343838 |
| 0.1305861460117026 | 0.9116092245725007 | 0.3249363108857838 |
| 0.7957133080673385 | 0.2406819735020256 | 0.6673963857625290 |
| 0.7009954662894911 | 0.3001670752689916 | 0.4992256148877099 |
| 0.7002337214683844 | 0.8001954490579104 | 0.5025174315211258 |
| 0.1992724212258739 | 0.2993320129744086 | 0.4995273474701273 |
| 0.2006404847086148 | 0.8002305775135589 | 0.4994174870724232 |
| 0.8700984069896165 | 0.1275049317236927 | 0.3353107561468582 |
| 0.5335696688493066 | 0.4619745598175058 | 0.6630071478842454 |
| 0.3727570334200918 | 0.6416793132657848 | 0.3380402126173331 |
| 0.0271679655224799 | 0.9565765560979183 | 0.6646334494182805 |
| 0.3664346506759247 | 0.1330728470446312 | 0.3146265126013065 |
| 0.0345353773264598 | 0.4664882490273471 | 0.6852471285205550 |
| 0.8574490755529216 | 0.6290161672156519 | 0.3350019081509161 |
| 0.5425511759688988 | 0.9743050143845152 | 0.6658676241321867 |
| 0.5649878807253187 | 0.7001246583410580 | 0.7863943639446885 |
| 0.5817189046824597 | 0.6518032152043047 | 0.7548394278182863 |



### The perfect Rh<sub>11</sub>-2H\* surface

O In Rh In H

|                     |                     |                     |  |  |
|---------------------|---------------------|---------------------|--|--|
| 1.000000000000000   |                     |                     |  |  |
| 14.4442996979000000 | 0.0000000000000000  | 0.0000000000000000  |  |  |
| -7.2221498489000000 | 12.5091304781999995 | 0.0000000000000000  |  |  |
| 0.0000000000000000  | 0.0000000000000000  | 17.9855003356999994 |  |  |

|    |    |    |    |   |
|----|----|----|----|---|
| O  | In | Rh | In | H |
| 72 | 41 | 1  | 6  | 2 |

Direct

|                    |                    |                    |
|--------------------|--------------------|--------------------|
| 0.8427794187600809 | 0.6129816606730148 | 0.4555473341533221 |
| 0.5153871278551841 | 0.9518308687594244 | 0.2892604287105727 |
| 0.1734995081798368 | 0.2824552511236054 | 0.6199976469687902 |
| 0.7917439790291679 | 0.9603532049510504 | 0.2983522939280694 |
| 0.4731437109541211 | 0.2983433563347864 | 0.6386136834071413 |
| 0.1326499694303346 | 0.6258402379528949 | 0.4680971384329112 |
| 0.3019304212139651 | 0.7306878467321180 | 0.3010751631442518 |
| 0.9780156847061809 | 0.0710309784409904 | 0.6363209843578677 |
| 0.6392711081311048 | 0.4051855093695845 | 0.4642671981275450 |
| 0.5287347759876370 | 0.2098986875874948 | 0.2696441219572999 |
| 0.1795514034652290 | 0.5382946709035222 | 0.6078530875241502 |
| 0.8551937744021505 | 0.8809043701714078 | 0.4414745927475538 |
| 0.8869656568969507 | 0.1291292540472221 | 0.4554287582670124 |
| 0.5466258658402922 | 0.4631196577360008 | 0.2910917467713792 |
| 0.2175128410434747 | 0.7912311408352384 | 0.6199298308828487 |
| 0.5388932707751505 | 0.7311893406093655 | 0.3011377537911664 |
| 0.2055092010141389 | 0.0769263373294353 | 0.6523011498368215 |
| 0.8758047478369706 | 0.4075889163076240 | 0.4676905905157461 |
| 0.7673965289827340 | 0.4684826785394927 | 0.2993047780215677 |
| 0.4283765726575229 | 0.8111784907417970 | 0.6406277360755389 |
| 0.0937706616838376 | 0.1344867681888233 | 0.4641591829892805 |
| 0.2903524347609834 | 0.2199606136847903 | 0.2698546667137908 |
| 0.9589688078295499 | 0.5438886945970739 | 0.6101062635279365 |
| 0.6161698372284095 | 0.8725690460431949 | 0.4440389700433131 |
| 0.3732048376081581 | 0.6595363348063038 | 0.4610821082961313 |
| 0.0356663228865410 | 0.9838182664815208 | 0.2889351011790676 |
| 0.7110890769171427 | 0.3291669925027602 | 0.6183236964714752 |
| 0.7657233512631172 | 0.7057386713451711 | 0.3007202684807604 |
| 0.4226119757244699 | 0.0342944350337160 | 0.6554327530045239 |
| 0.0916794306786889 | 0.3650849744087017 | 0.4687210493342737 |
| 0.0303699197726581 | 0.1986243585445723 | 0.2987660769374462 |
| 0.6947175566045853 | 0.5218894137000246 | 0.6343746760713591 |
| 0.3650148174793971 | 0.8583473049220007 | 0.4663469944841511 |
| 0.2804773246713331 | 0.9706516975190369 | 0.2682639839097061 |
| 0.9565468401629948 | 0.3152049959569905 | 0.6110066303036986 |

|                    |                    |                    |
|--------------------|--------------------|--------------------|
| 0.6234205843982114 | 0.6409851679931506 | 0.4471518973324236 |
| 0.2260472766214399 | 0.3174655016475314 | 0.3779680185363642 |
| 0.8859715868942153 | 0.6452257858693559 | 0.7118469191558150 |
| 0.5576345458538160 | 0.9890405158572926 | 0.5435208633944861 |
| 0.2674546276882734 | 0.9750638303455562 | 0.5298355209958030 |
| 0.9281032505887218 | 0.3059246920825314 | 0.3435892456655209 |
| 0.6026127289199164 | 0.6186510082954527 | 0.6979579048667935 |
| 0.7598723692079333 | 0.1946505653613337 | 0.5346867886834860 |
| 0.4237752522090514 | 0.5288561218074321 | 0.3702051531802568 |
| 0.0983537544318141 | 0.8673715537180419 | 0.6992837465080001 |
| 0.5454700632971556 | 0.7208959090471079 | 0.5677868477907498 |
| 0.2148207923740400 | 0.0589077398923892 | 0.3872563535978991 |
| 0.8722362877172335 | 0.3902804534364698 | 0.7295658565933598 |
| 0.1825527165138380 | 0.8098145609969737 | 0.3779223646620226 |
| 0.8567413275279101 | 0.1410620804987917 | 0.7124211141350998 |
| 0.5197859192762025 | 0.4730489586650513 | 0.5534662210202210 |
| 0.5273225659208005 | 0.1908539482373870 | 0.5283887688029607 |
| 0.1951358120250418 | 0.5221277094649543 | 0.3503760246810633 |
| 0.8589897562551881 | 0.8660870274324347 | 0.7009081000010089 |
| 0.3055266952839062 | 0.4631459853142825 | 0.5348376919186919 |
| 0.9707962642580812 | 0.7931190992285670 | 0.3628326019298086 |
| 0.6335012176505642 | 0.1383439230940956 | 0.7018489409544131 |
| 0.7852209729322505 | 0.7267324187666280 | 0.5588615879956064 |
| 0.4388849871425393 | 0.0549229656749037 | 0.3870692582872822 |
| 0.1132284547928399 | 0.3821498957325922 | 0.7289331246200985 |
| 0.6911379893579179 | 0.2726654765434414 | 0.3779769502392213 |
| 0.3552077868095961 | 0.6110105303901603 | 0.7044144953954754 |
| 0.0289439281276601 | 0.9419177924778478 | 0.5426302174176489 |
| 0.3059007083743492 | 0.2321766309029893 | 0.5281431079080601 |
| 0.9781973520117341 | 0.5715429021575931 | 0.3434783217834849 |
| 0.6385922908691035 | 0.9107006591890902 | 0.6951412682247395 |
| 0.0354200812200900 | 0.7409773222089023 | 0.5334409602118012 |
| 0.7052538512107739 | 0.0762432643568152 | 0.3648723553491084 |
| 0.3793903766133415 | 0.4007839929933401 | 0.6957540627301356 |
| 0.7772644495956895 | 0.9589659234043031 | 0.5577076283120860 |
| 0.4433628285251789 | 0.2834672693885241 | 0.3893144282099821 |
| 0.1174349808161202 | 0.6280610006580950 | 0.7290199138368332 |
| 0.1395021357996700 | 0.1453415926831451 | 0.3313462369186229 |
| 0.8126099454903232 | 0.4800284847654490 | 0.6741929701788164 |
| 0.5973068594543393 | 0.6222797929491698 | 0.3258123185790089 |
| 0.2549834457845074 | 0.9546055452849019 | 0.6517102639219785 |
| 0.9254450525529728 | 0.2898803954404232 | 0.4955153991808643 |
| 0.4702463992936626 | 0.8120918633742509 | 0.5184482787736406 |
| 0.3538345380264514 | 0.8939489648182833 | 0.3313147802681088 |

|                    |                    |                    |
|--------------------|--------------------|--------------------|
| 0.0205899150565805 | 0.2317941546321038 | 0.6755098964121384 |
| 0.8752081050501680 | 0.8747406472683423 | 0.3215561602829513 |
| 0.5488426272309697 | 0.2043996489197074 | 0.6493785361402572 |
| 0.2085021467228804 | 0.5338592014025746 | 0.4934742734647231 |
| 0.6925885679542392 | 0.5586092671682570 | 0.5139642167593933 |
| 0.6048933016819580 | 0.3594395715550466 | 0.3328128794434551 |
| 0.2661092829740694 | 0.6858927585106277 | 0.6723467103981104 |
| 0.6238214312889165 | 0.9003707132754732 | 0.3234903050050529 |
| 0.2971000818979725 | 0.2435029439551564 | 0.6499441826720580 |
| 0.9657507073564975 | 0.5745872721138785 | 0.4946632542377104 |
| 0.9412198839625648 | 0.0302137839997122 | 0.5120128046726586 |
| 0.9312698781102062 | 0.7897838419352857 | 0.4853995943735994 |
| 0.4745684555444451 | 0.3073103558635664 | 0.5053918131993139 |
| 0.1451409487402818 | 0.6455889161835332 | 0.3469723640712707 |
| 0.8035640172781767 | 0.9807213316173516 | 0.6781658157959877 |
| 0.5875665270865716 | 0.1181837822474736 | 0.3247822659739393 |
| 0.2621694430802966 | 0.4539478793714994 | 0.6642020587662455 |
| 0.7106437673857141 | 0.0409253379094604 | 0.4874712808781447 |
| 0.1899849574385113 | 0.0643358622163662 | 0.5030728602133050 |
| 0.8549530877732464 | 0.3995788200362860 | 0.3459586494058702 |
| 0.5202964934486111 | 0.7357472819000695 | 0.6907820233602407 |
| 0.3810817567744235 | 0.3696909091974118 | 0.3271057388615278 |
| 0.0461582988198173 | 0.7050201465720543 | 0.6664306957752989 |
| 0.4608175791383871 | 0.5737037439590142 | 0.4956914108524511 |
| 0.4344511315816409 | 0.0246909567840053 | 0.5026409474041527 |
| 0.0994614955253786 | 0.3543207169285670 | 0.3469517994835519 |
| 0.7816844076575713 | 0.6980334309640188 | 0.6764458482624235 |
| 0.1302861827476669 | 0.9116145383414637 | 0.3237456180479383 |
| 0.7962171920618505 | 0.2408226543310827 | 0.6678387364116798 |
| 0.7012945185316752 | 0.3002006187530339 | 0.4981051171547257 |
| 0.6996420454197647 | 0.8005498639325312 | 0.5038807629547124 |
| 0.1993657354592900 | 0.2990466116300801 | 0.4983929501482603 |
| 0.2001795821555206 | 0.8001380440754327 | 0.4989472344973119 |
| 0.8697313025107186 | 0.1277067273266777 | 0.3345798953349906 |
| 0.5318930018724061 | 0.4565774903942355 | 0.6620908076654691 |
| 0.3734752022047721 | 0.6425514683122305 | 0.3396953471458024 |
| 0.0274810500945581 | 0.9567866498528457 | 0.6639932480649192 |
| 0.3660450529848211 | 0.1331538840270258 | 0.3133910052736132 |
| 0.0345475492505680 | 0.4662755396880729 | 0.6842390500349055 |
| 0.8573713154794208 | 0.6289523267057011 | 0.3342929072291864 |
| 0.5432525762725329 | 0.9781231076311891 | 0.6652071238047546 |
| 0.5536277292686677 | 0.7292993702739882 | 0.7856063590011442 |
| 0.5852782403739709 | 0.6188491722073405 | 0.7503315085303199 |

**The perfect Rh<sub>11</sub>-[TS-H<sub>2</sub>O]\* surface**

| O                   | In | Rh                  | In | H                   |
|---------------------|----|---------------------|----|---------------------|
| 1.000000000000000   |    |                     |    |                     |
| 14.4442996979000000 |    | 0.0000000000000000  |    | 0.0000000000000000  |
| -7.2221498489000000 |    | 12.5091304781999995 |    | 0.0000000000000000  |
| 0.0000000000000000  |    | 0.0000000000000000  |    | 17.9855003356999994 |

| O  | In | Rh | In | H |
|----|----|----|----|---|
| 72 | 41 | 1  | 6  | 2 |

**Direct**

|                    |                    |                    |
|--------------------|--------------------|--------------------|
| 0.8420923373890826 | 0.6141702989641120 | 0.4567884171764828 |
| 0.5152198072052649 | 0.9525751692503874 | 0.2883271301576048 |
| 0.1733469974977568 | 0.2840155563419928 | 0.6203397145360378 |
| 0.7916698988400055 | 0.9610132764817181 | 0.2984876247902969 |
| 0.4731448378885437 | 0.2999498464407216 | 0.6366579181892468 |
| 0.1333049249768741 | 0.6266083915580497 | 0.4683568255355073 |
| 0.3011691804980621 | 0.7311853889803548 | 0.2999650140759151 |
| 0.9766524764700192 | 0.0713354690044080 | 0.6364217358826896 |
| 0.6385894724996265 | 0.4063465790950949 | 0.4639148202553625 |
| 0.5286364616531523 | 0.2108953029467641 | 0.2683639059674780 |
| 0.1832562732024037 | 0.5399331664098435 | 0.6095828769898355 |
| 0.8544923277595416 | 0.8814572339587065 | 0.4423565394129741 |
| 0.8857936263185108 | 0.1293954342744726 | 0.4560446473829354 |
| 0.5459587947966628 | 0.4632407895788656 | 0.2897185038405285 |
| 0.2191278852834672 | 0.7928234481348001 | 0.6197797039169702 |
| 0.5384430771487246 | 0.7313335665118014 | 0.3005824099277296 |
| 0.2054809895960114 | 0.0780166401654784 | 0.6543350668990930 |
| 0.8749591993518425 | 0.4080842338887277 | 0.4675123469662250 |
| 0.7674632448999867 | 0.4697555667848791 | 0.2993043918921276 |
| 0.4282149397785736 | 0.8110740704177634 | 0.6372709459805853 |
| 0.0922081912652526 | 0.1343406505295873 | 0.4640260689437690 |
| 0.2893407143500796 | 0.2199021006164963 | 0.2688456368622620 |
| 0.9600316249976748 | 0.5442622200075492 | 0.6095339050412750 |
| 0.6168516047338798 | 0.8746552978724805 | 0.4426816293290089 |
| 0.3713431745132108 | 0.6587725029810824 | 0.4590792822101489 |
| 0.0350587310039506 | 0.9837862776815597 | 0.2884738918632414 |
| 0.7105572538610152 | 0.3311549064248998 | 0.6179104817149640 |
| 0.7657520551334761 | 0.7066544008624099 | 0.3005098666704286 |
| 0.4223916194625750 | 0.0355263242602026 | 0.6576599576431112 |
| 0.0912945756862295 | 0.3663368533662847 | 0.4684459316195660 |
| 0.0296111741307002 | 0.1987223934007049 | 0.2988701929095396 |
| 0.6956660125026914 | 0.5250087825245709 | 0.6346764507305236 |
| 0.3646556055274228 | 0.8600548413312346 | 0.4641028053552492 |
| 0.2795080925888481 | 0.9706855271901693 | 0.2674029585270811 |
| 0.9569314058718726 | 0.3164133714516060 | 0.6110324023369682 |

|                    |                    |                    |
|--------------------|--------------------|--------------------|
| 0.6236537801062617 | 0.6400937101406935 | 0.4462184246227191 |
| 0.2255225498503927 | 0.3175082260583736 | 0.3778279547033767 |
| 0.8890283755941142 | 0.6452781113848924 | 0.7127358163460658 |
| 0.5564657591185239 | 0.9894869297014279 | 0.5433028778778570 |
| 0.2678103705956738 | 0.9763765999635809 | 0.5298972675519775 |
| 0.9276078263652765 | 0.3065314191769691 | 0.3433160485659322 |
| 0.6170031398168154 | 0.5957268851508333 | 0.7353274113998661 |
| 0.7590845309289966 | 0.1959289287172666 | 0.5347135480921353 |
| 0.4231227599524269 | 0.5286536732344000 | 0.3687712044749520 |
| 0.0981382743161286 | 0.8678490461287195 | 0.6987439746098806 |
| 0.5438908378503504 | 0.7203030858981462 | 0.5616755761655786 |
| 0.2143627790663193 | 0.0591878084853632 | 0.3865886875654457 |
| 0.8724369552942560 | 0.3908409166491851 | 0.7293349365946015 |
| 0.1819361450194151 | 0.8100909597801063 | 0.3776060653393727 |
| 0.8555624861150842 | 0.1410375955538052 | 0.7117940483591719 |
| 0.5176665185858372 | 0.4722819875761980 | 0.5553062660283019 |
| 0.5261723979510406 | 0.1916205530257883 | 0.5281058375212622 |
| 0.1942118925184002 | 0.5222442752481434 | 0.3482478869752115 |
| 0.8594413412042921 | 0.8675106077171402 | 0.7029510436256862 |
| 0.3053991979696919 | 0.4634065495080590 | 0.5350254128647466 |
| 0.9702080490800155 | 0.7941566167540385 | 0.3640215787930973 |
| 0.6338297685981529 | 0.1399721050896986 | 0.7012254843639260 |
| 0.7837666779508722 | 0.7274995704537627 | 0.5613284114735386 |
| 0.4386631283922342 | 0.0559737620570704 | 0.3855108995962346 |
| 0.1137035488924014 | 0.3829685596575052 | 0.7295408263917583 |
| 0.6902184049155743 | 0.2733718070961657 | 0.3775242111689381 |
| 0.3572278434655785 | 0.6151567205251149 | 0.7100378082731824 |
| 0.0284173356640252 | 0.9426165611380145 | 0.5433383942579963 |
| 0.3042785083409142 | 0.2316286774465948 | 0.5280699582612105 |
| 0.9776464305877498 | 0.5725305191474289 | 0.3456620065981763 |
| 0.6340986495493930 | 0.9105886184498422 | 0.7025615309092320 |
| 0.0358044055787335 | 0.7416723848315299 | 0.5338071011983537 |
| 0.7048046986384883 | 0.0774108648358312 | 0.3643402561594971 |
| 0.3791775977799605 | 0.3990383576461245 | 0.6992437917179440 |
| 0.7740026566943420 | 0.9583520011031672 | 0.5592028494011958 |
| 0.4427525061534908 | 0.2836962079535471 | 0.3883422257600758 |
| 0.1175832381784916 | 0.6290845694376461 | 0.7291689979677587 |
| 0.1388211427190755 | 0.1454345975967109 | 0.3308870069740180 |
| 0.8135297219575782 | 0.4809890004662781 | 0.6737879389512554 |
| 0.5971600553735971 | 0.6223646769569140 | 0.3248711350293796 |
| 0.2550171779128774 | 0.9560713833547799 | 0.6519071842959354 |
| 0.9249261011647293 | 0.2908812122192106 | 0.4955451196264299 |
| 0.4694689266414497 | 0.8129597081660418 | 0.5138486926379168 |
| 0.3533167386393034 | 0.8943434906801137 | 0.3300006264719995 |

|                    |                    |                    |
|--------------------|--------------------|--------------------|
| 0.0202584878317855 | 0.2325753466574870 | 0.6755618278329607 |
| 0.8749469570922259 | 0.8753981808376132 | 0.3219469851396515 |
| 0.5489410432721775 | 0.2054836887109530 | 0.6487769674274863 |
| 0.2085831094658728 | 0.5344417241116491 | 0.4943716245382279 |
| 0.6910047543164874 | 0.5589566652289931 | 0.5148740993164423 |
| 0.6044998021018199 | 0.3602123214313868 | 0.3320309972109512 |
| 0.2664923524734240 | 0.6874352221012334 | 0.6735872304458655 |
| 0.6235754181595452 | 0.9010535690853307 | 0.3223183864369414 |
| 0.2959283502798472 | 0.2443191112163320 | 0.6498379234943116 |
| 0.9657430391054554 | 0.5752530441293822 | 0.4939226612878618 |
| 0.9398700357038672 | 0.0307033325199814 | 0.5131038562276689 |
| 0.9305336238822852 | 0.7901557157492765 | 0.4867208484647252 |
| 0.4734497438498311 | 0.3089047384493687 | 0.5044722288949262 |
| 0.1449547971589996 | 0.6458797115497834 | 0.3468927083848342 |
| 0.8006031210353800 | 0.9797568594585425 | 0.6794324440291593 |
| 0.5875300848413977 | 0.1192143160375331 | 0.3235387127994991 |
| 0.2645007867661039 | 0.4559484647742405 | 0.6664825210421856 |
| 0.7099047439606937 | 0.0421592936089377 | 0.4872668646252202 |
| 0.1888727271307199 | 0.0644061294990729 | 0.5022007819889591 |
| 0.8543914137604059 | 0.4000786398146287 | 0.3457649561438998 |
| 0.5194340572134071 | 0.7388510286688541 | 0.6819800529142607 |
| 0.3802447445978493 | 0.3695254003013712 | 0.3259981417503292 |
| 0.0476880491228234 | 0.7060822902578909 | 0.6652552268600038 |
| 0.4594237861452397 | 0.5715975291691368 | 0.4930821677477321 |
| 0.4342820302903836 | 0.0262270723367752 | 0.5008724152752757 |
| 0.0991231049149989 | 0.3547833807667976 | 0.3464956218259497 |
| 0.7869929620111664 | 0.7001444614676720 | 0.6795994044570280 |
| 0.1295020858472898 | 0.9116177783246634 | 0.3234745412430628 |
| 0.7961243780602248 | 0.2418425576977464 | 0.6673203969933110 |
| 0.7005987245747836 | 0.3016369334419277 | 0.4976320999590324 |
| 0.6993518369588962 | 0.8007328401436885 | 0.5026801443452894 |
| 0.1981859593315379 | 0.2991895675199808 | 0.4983795536137031 |
| 0.2002825386184315 | 0.8011169878526885 | 0.4986306666573653 |
| 0.8691472313484364 | 0.1283535758775770 | 0.3347440940052803 |
| 0.5332490454236292 | 0.4539445044200187 | 0.6655949913512007 |
| 0.3722125796163390 | 0.6421022481731942 | 0.3378942779866653 |
| 0.0281339122329913 | 0.9589084057655500 | 0.6647771429340203 |
| 0.3656085616051731 | 0.1335107775589091 | 0.3119483349091891 |
| 0.0350897287633446 | 0.4671027069632103 | 0.6847280299364229 |
| 0.8567316063914058 | 0.6298813445845501 | 0.3353138859995979 |
| 0.5417226891392912 | 0.9793684810405373 | 0.6651865311216733 |
| 0.5914779116260379 | 0.6780712380138564 | 0.7240034057247527 |
| 0.5981689658813469 | 0.5818636430904225 | 0.7877572719596228 |

### The perfect Rh<sub>11</sub>-H<sub>2</sub>O\* surface

O In Rh In H

|                     |                     |                     |  |  |
|---------------------|---------------------|---------------------|--|--|
| 1.000000000000000   |                     |                     |  |  |
| 14.4442996979000000 | 0.0000000000000000  | 0.0000000000000000  |  |  |
| -7.2221498489000000 | 12.5091304781999995 | 0.0000000000000000  |  |  |
| 0.0000000000000000  | 0.0000000000000000  | 17.9855003356999994 |  |  |

|    |    |    |    |   |
|----|----|----|----|---|
| O  | In | Rh | In | H |
| 72 | 41 | 1  | 6  | 2 |

Direct

|                    |                    |                    |
|--------------------|--------------------|--------------------|
| 0.8405297843886046 | 0.6129987384717573 | 0.4553904919694805 |
| 0.5142653871270917 | 0.9515935133967823 | 0.2872059754323011 |
| 0.1698081261612136 | 0.2796600037700143 | 0.6183373880883744 |
| 0.7906848661989933 | 0.9603188950891819 | 0.2967110422146959 |
| 0.4677226761580122 | 0.2944489622094473 | 0.6446943026537053 |
| 0.1327536817140819 | 0.6252814278733411 | 0.4680311151084531 |
| 0.2996341723613962 | 0.7297904499072573 | 0.2987038536331453 |
| 0.9745261966660753 | 0.0693810791808203 | 0.6335813449080381 |
| 0.6380170933847106 | 0.4046020858082977 | 0.4650409019425016 |
| 0.5280976960474656 | 0.2097719145373111 | 0.2672200468824668 |
| 0.1839810769750495 | 0.5389874369535759 | 0.6090563838742347 |
| 0.8552724786657200 | 0.8822910284323610 | 0.4396643000343145 |
| 0.8843995627250471 | 0.1282366321161799 | 0.4553905454239571 |
| 0.5453653777901938 | 0.4617696765497899 | 0.2885372921214382 |
| 0.2169703797862667 | 0.7896469628305662 | 0.6187171415826700 |
| 0.5375848676953036 | 0.7301802694683791 | 0.2982085994708152 |
| 0.2030270057205729 | 0.0741583313093711 | 0.6583584463436331 |
| 0.8727704192465429 | 0.4060781861901989 | 0.4676055531594230 |
| 0.7662660636102162 | 0.4677908470009049 | 0.2983924276475030 |
| 0.4250803997029677 | 0.8059934968029044 | 0.6330992249822248 |
| 0.0920592825339321 | 0.1328468669156417 | 0.4615107622847660 |
| 0.2888725467904870 | 0.2188249298901876 | 0.2673375078645699 |
| 0.9565822260212911 | 0.5417920207545938 | 0.6087520575122730 |
| 0.6150263034921555 | 0.8719359917449921 | 0.4410525204645513 |
| 0.3720112569630238 | 0.6576432581502530 | 0.4574666378633379 |
| 0.0348279909610141 | 0.9828201269177075 | 0.2860518402831281 |
| 0.7048114034423395 | 0.3299897806501680 | 0.6192326321611836 |
| 0.7655118301437326 | 0.7059413052547981 | 0.2979668217683653 |
| 0.4197140639669313 | 0.0284893702277846 | 0.6589670677713879 |
| 0.0903798765751811 | 0.3646797656423832 | 0.4679852149446792 |
| 0.0288298059305122 | 0.1978683799814576 | 0.2977913549179881 |
| 0.6867867566969073 | 0.5337252042421353 | 0.6396715877255208 |
| 0.3633411746481507 | 0.8590399786394173 | 0.4622267242859228 |
| 0.2792700193027140 | 0.9692825405675506 | 0.2656385720918588 |
| 0.9549509860623631 | 0.3146773656780510 | 0.6103794979360919 |

|                    |                    |                    |
|--------------------|--------------------|--------------------|
| 0.6239607153236435 | 0.6404282370606884 | 0.4434438396802147 |
| 0.2252640051949065 | 0.3165185252089232 | 0.3768005479311176 |
| 0.8865453017442527 | 0.6423121042154832 | 0.7118475204052908 |
| 0.5554259517629381 | 0.9862093712952978 | 0.5428125780775813 |
| 0.2666179132162045 | 0.9748033681280631 | 0.5299726312925530 |
| 0.9264895410408208 | 0.3050556434684165 | 0.3439276725021766 |
| 0.6695567757810443 | 0.6854310962296873 | 0.7757010951552118 |
| 0.7576424426849317 | 0.1948077656542312 | 0.5351618839105007 |
| 0.4223867908150377 | 0.5276491875043090 | 0.3663268279204945 |
| 0.0942055070223700 | 0.8631722831966164 | 0.6969455027512756 |
| 0.5454235044416466 | 0.7153572128496204 | 0.5612477961239807 |
| 0.2139436518718116 | 0.0575794948616380 | 0.3842198700886197 |
| 0.8687714313798408 | 0.3882667209547077 | 0.7280814345396858 |
| 0.1806173208265726 | 0.8088512895931811 | 0.3764761664432080 |
| 0.8514356029523503 | 0.1363669739544844 | 0.7099951420315050 |
| 0.5155518517843498 | 0.4698252683578610 | 0.5478941285649471 |
| 0.5239800510572443 | 0.1890766266256352 | 0.5298662396947411 |
| 0.1936788649553707 | 0.5212690341010244 | 0.3486612569394590 |
| 0.8602935720870174 | 0.8680880783704371 | 0.7036325684334869 |
| 0.3042108919623898 | 0.4619480508448748 | 0.5334560899606077 |
| 0.9695703520939108 | 0.7930100995282540 | 0.3618737093249283 |
| 0.6319105288990624 | 0.1328215313794331 | 0.6989742660894838 |
| 0.7863132179180220 | 0.7297005312001696 | 0.5577167560431477 |
| 0.4377418719028581 | 0.0550914197288312 | 0.3848579016183264 |
| 0.1107814433332975 | 0.3803140571545699 | 0.7281285071336892 |
| 0.6882864246999770 | 0.2715870611620491 | 0.3777634558292184 |
| 0.3606703858708570 | 0.6133417695966061 | 0.7108329884753021 |
| 0.0286149028938557 | 0.9420404043037762 | 0.5417208138545979 |
| 0.3032598497083128 | 0.2285324673083228 | 0.5283779115628675 |
| 0.9761421845031334 | 0.5707753533117988 | 0.3466575392827235 |
| 0.6290419944074456 | 0.8920842243227719 | 0.7028912046272179 |
| 0.0344039308733176 | 0.7396527527595961 | 0.5324245687404257 |
| 0.7034801266689624 | 0.0757373774562424 | 0.3640240548999210 |
| 0.3703422620219023 | 0.3981046735646604 | 0.6951992873105728 |
| 0.7715663702354797 | 0.9558118820449957 | 0.5573420066553538 |
| 0.4421244958441288 | 0.2823856012352255 | 0.3876939130985059 |
| 0.1166698641406781 | 0.6261106958567711 | 0.7283292582389272 |
| 0.1381418251803815 | 0.1443414033529619 | 0.3290398155426479 |
| 0.8084015926512270 | 0.4789128711904319 | 0.6730873586745673 |
| 0.5969586931165726 | 0.6215910992167407 | 0.3220820860699365 |
| 0.2527650394659954 | 0.9526268101802760 | 0.6522285494750111 |
| 0.9237590568741165 | 0.2898028823931201 | 0.4943655006481872 |
| 0.4682939121262035 | 0.8114858787928476 | 0.5105431483169011 |
| 0.3523898553735429 | 0.8931881149861564 | 0.3289862382817307 |



|                    |                    |                    |
|--------------------|--------------------|--------------------|
| 0.0172795279040989 | 0.2294463992427073 | 0.6737891150528684 |
| 0.8745876096309110 | 0.8748494732212436 | 0.3192179472530990 |
| 0.5431482066313497 | 0.1999523623365745 | 0.6519102192631590 |
| 0.2079836119618552 | 0.5330409486099325 | 0.4924395056737391 |
| 0.6900257823274620 | 0.5587960878483037 | 0.5138346932195512 |
| 0.6035049305686153 | 0.3586109529409331 | 0.3312752784524708 |
| 0.2653689920351902 | 0.6857658889714568 | 0.6726154518220200 |
| 0.6226065980711374 | 0.8998696762294890 | 0.3202735853523673 |
| 0.2925688006458982 | 0.2393415418546376 | 0.6501724987952162 |
| 0.9641635130238948 | 0.5735733618413352 | 0.4923891800978030 |
| 0.9396746208223218 | 0.0299086347422280 | 0.5108357323141115 |
| 0.9317418443067766 | 0.7902397502945329 | 0.4837003728349454 |
| 0.4719369670532865 | 0.3050898309420237 | 0.5041984785756709 |
| 0.1437040474088612 | 0.6446794797535259 | 0.3462411595316951 |
| 0.7995773533354208 | 0.9769562281255908 | 0.6762542399571975 |
| 0.5865246489762918 | 0.1180142252526220 | 0.3228838468784731 |
| 0.2589728144287798 | 0.4522004660003171 | 0.6633166627304030 |
| 0.7086553926347653 | 0.0412027481478753 | 0.4861741264423327 |
| 0.1882448643145405 | 0.0621750264661728 | 0.4992883761756329 |
| 0.8524696422898081 | 0.3980310288667842 | 0.3457608161834735 |
| 0.5136987313212977 | 0.7295848308410280 | 0.6756048266300487 |
| 0.3796902201944784 | 0.3680222769250308 | 0.3247239102675280 |
| 0.0460045689077532 | 0.7028303073618124 | 0.6635678264968429 |
| 0.4580834887511950 | 0.5686438878132033 | 0.4888791857922031 |
| 0.4330410912381705 | 0.0245816977481341 | 0.5002756983310244 |
| 0.0984040504898321 | 0.3535368930211644 | 0.3458831051654446 |
| 0.7924256319000303 | 0.7039192666933769 | 0.6742991013404138 |
| 0.1288319099585963 | 0.9101290240446231 | 0.3208448601545160 |
| 0.7932066456408680 | 0.2394026569375848 | 0.6656440839920484 |
| 0.6983304276616960 | 0.2995101999402600 | 0.4983387996561369 |
| 0.6998506191160424 | 0.8001058684591059 | 0.4986920440252611 |
| 0.1973461954406036 | 0.2970571857865938 | 0.4971802777601461 |
| 0.1990533755948257 | 0.7997823602975103 | 0.4975694855054118 |
| 0.8681583324702087 | 0.1272678168456140 | 0.3337223830742772 |
| 0.5188716833949563 | 0.4570282970771205 | 0.6582933299140096 |
| 0.3714381069219203 | 0.6411849006760494 | 0.3355964219618513 |
| 0.0287662613178572 | 0.9590098278269987 | 0.6634207898789305 |
| 0.3650505926404732 | 0.1322132151387655 | 0.3101201225821328 |
| 0.0313389341264572 | 0.4642210085397994 | 0.6841732994821470 |
| 0.8553525557662824 | 0.6283190567223625 | 0.3338188505152764 |
| 0.5389234629891050 | 0.9720970181018728 | 0.6644215356727901 |
| 0.7107407835657873 | 0.7484383053434297 | 0.8065157780270649 |
| 0.6413591158085128 | 0.6237857757372162 | 0.8085535227928643 |
